# Supplementary material for: Integrative analysis of genome-wide gene copy number changes and gene expression in non-small cell lung cancer
Source: PubMed Central journal article supplement (PMC5675410; doi:10.1371/journal.pone.0187246), 2017-11-07

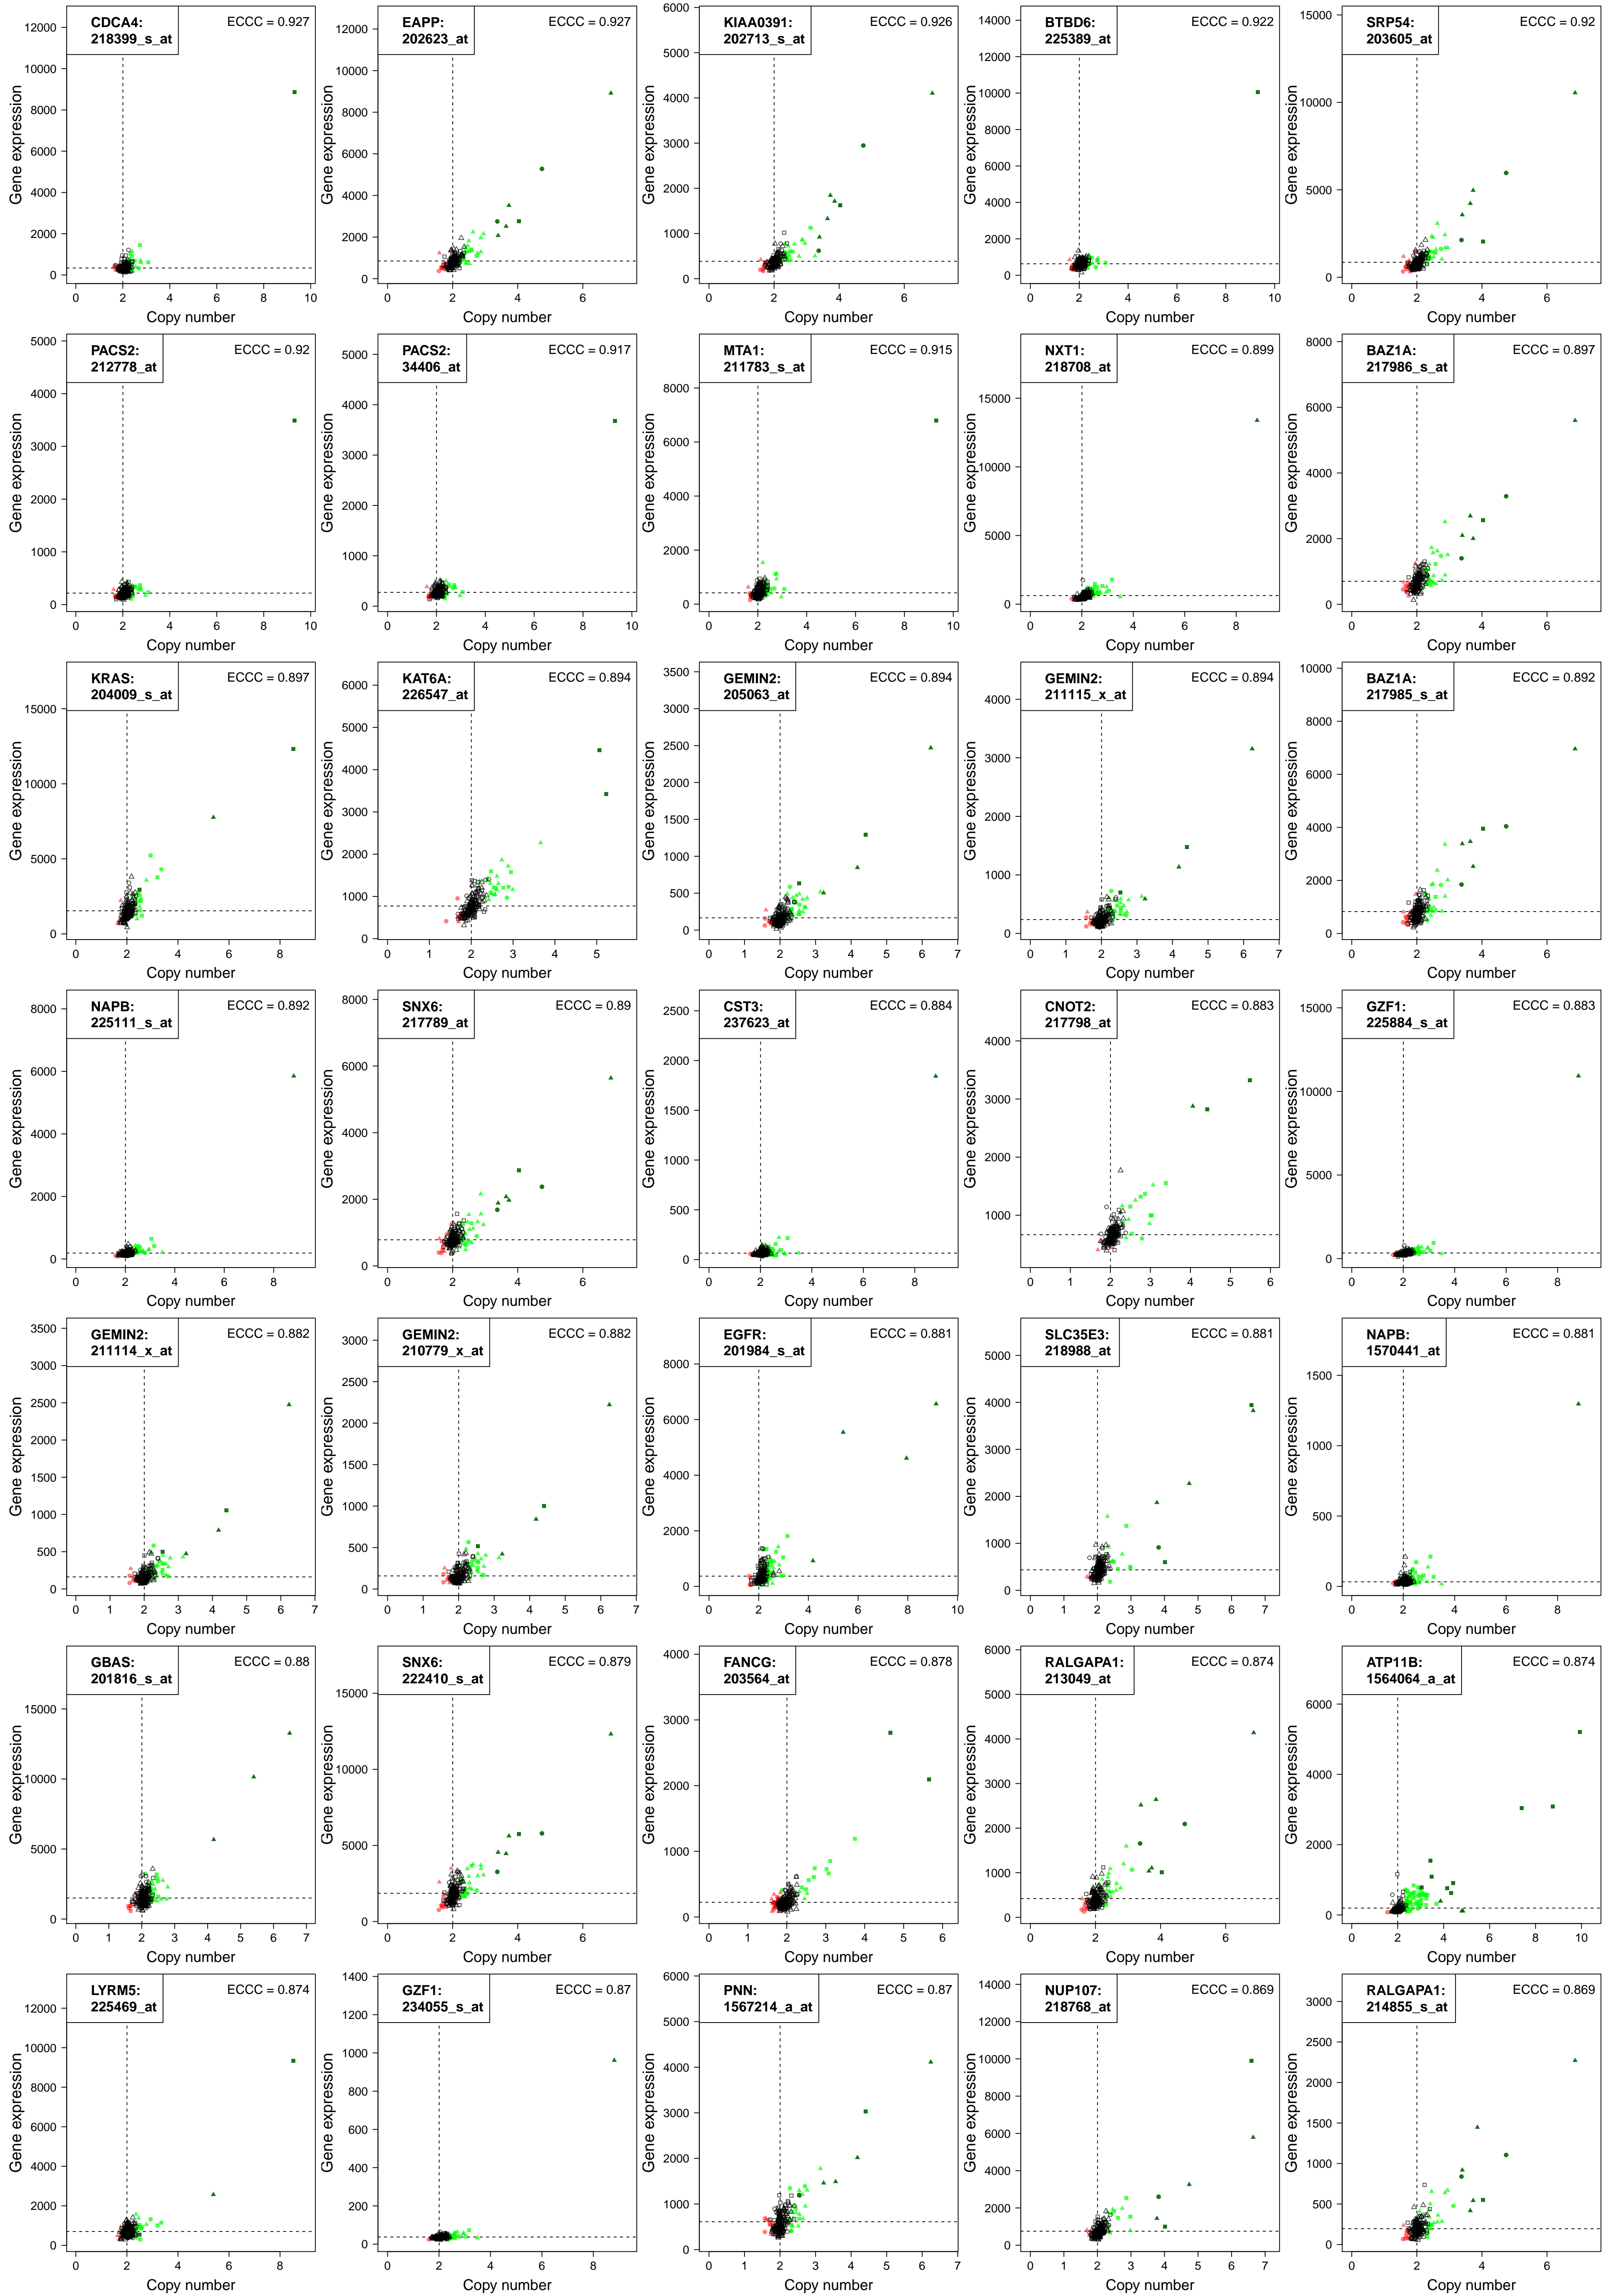

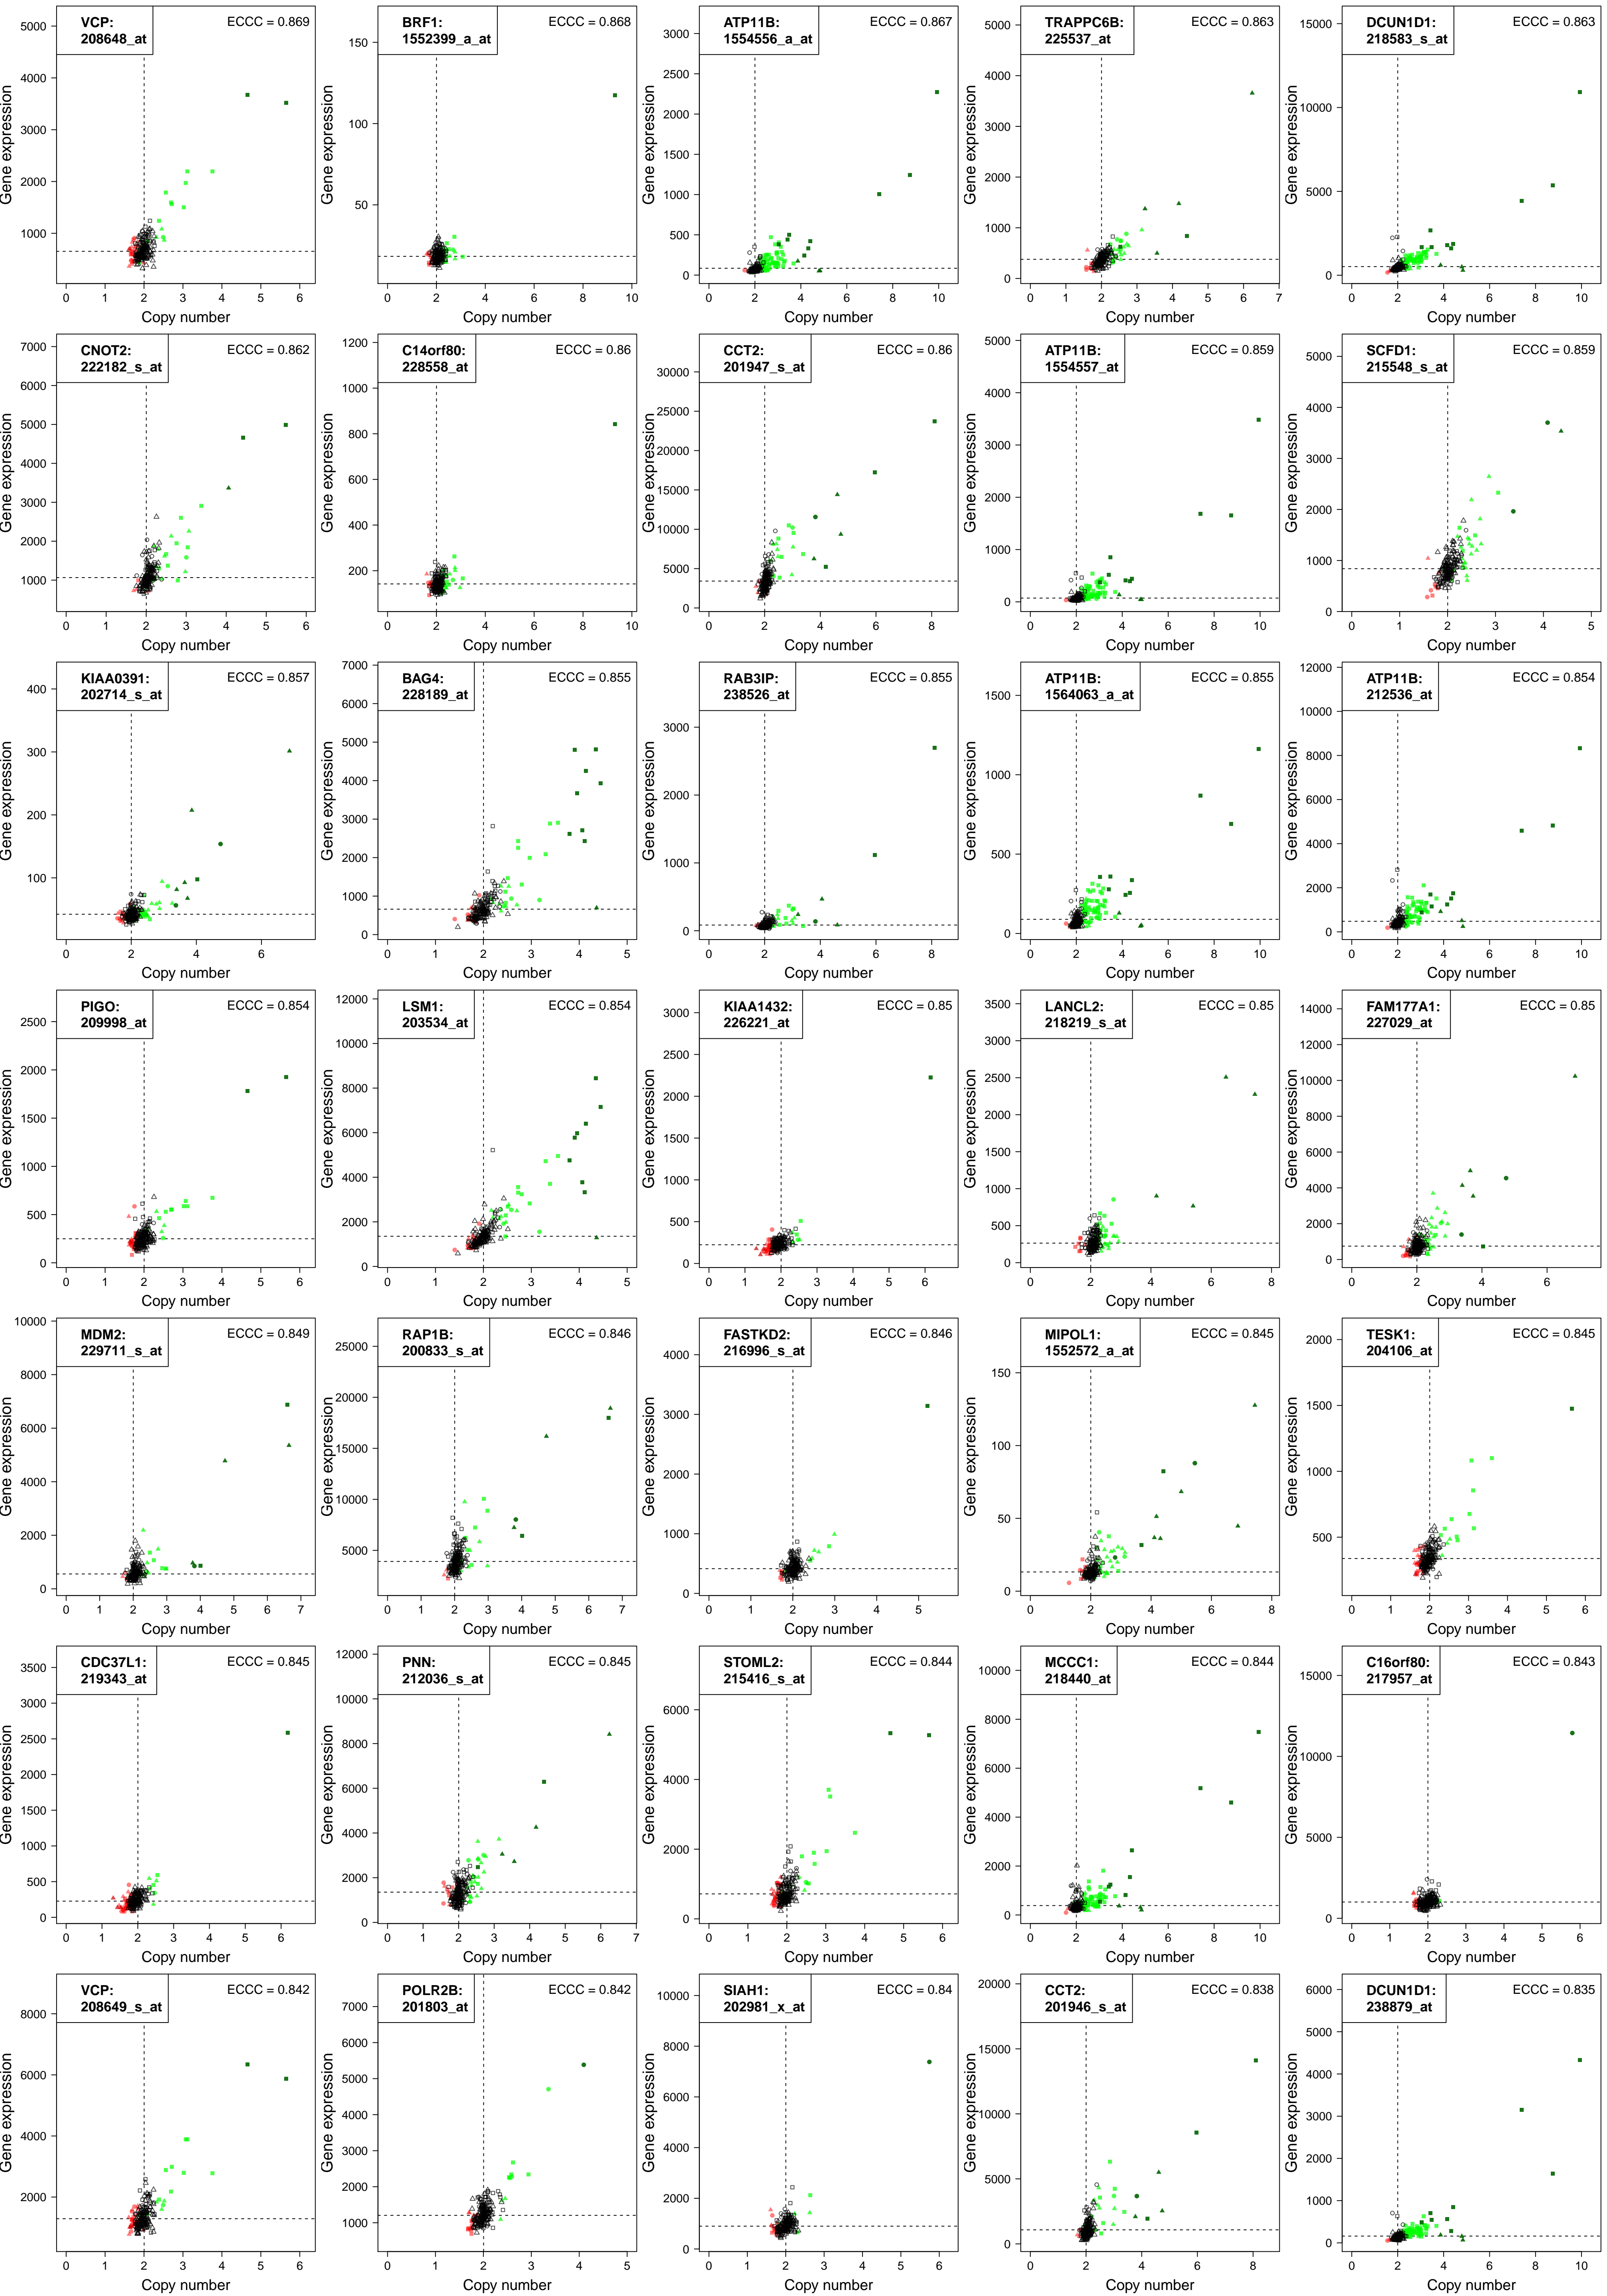

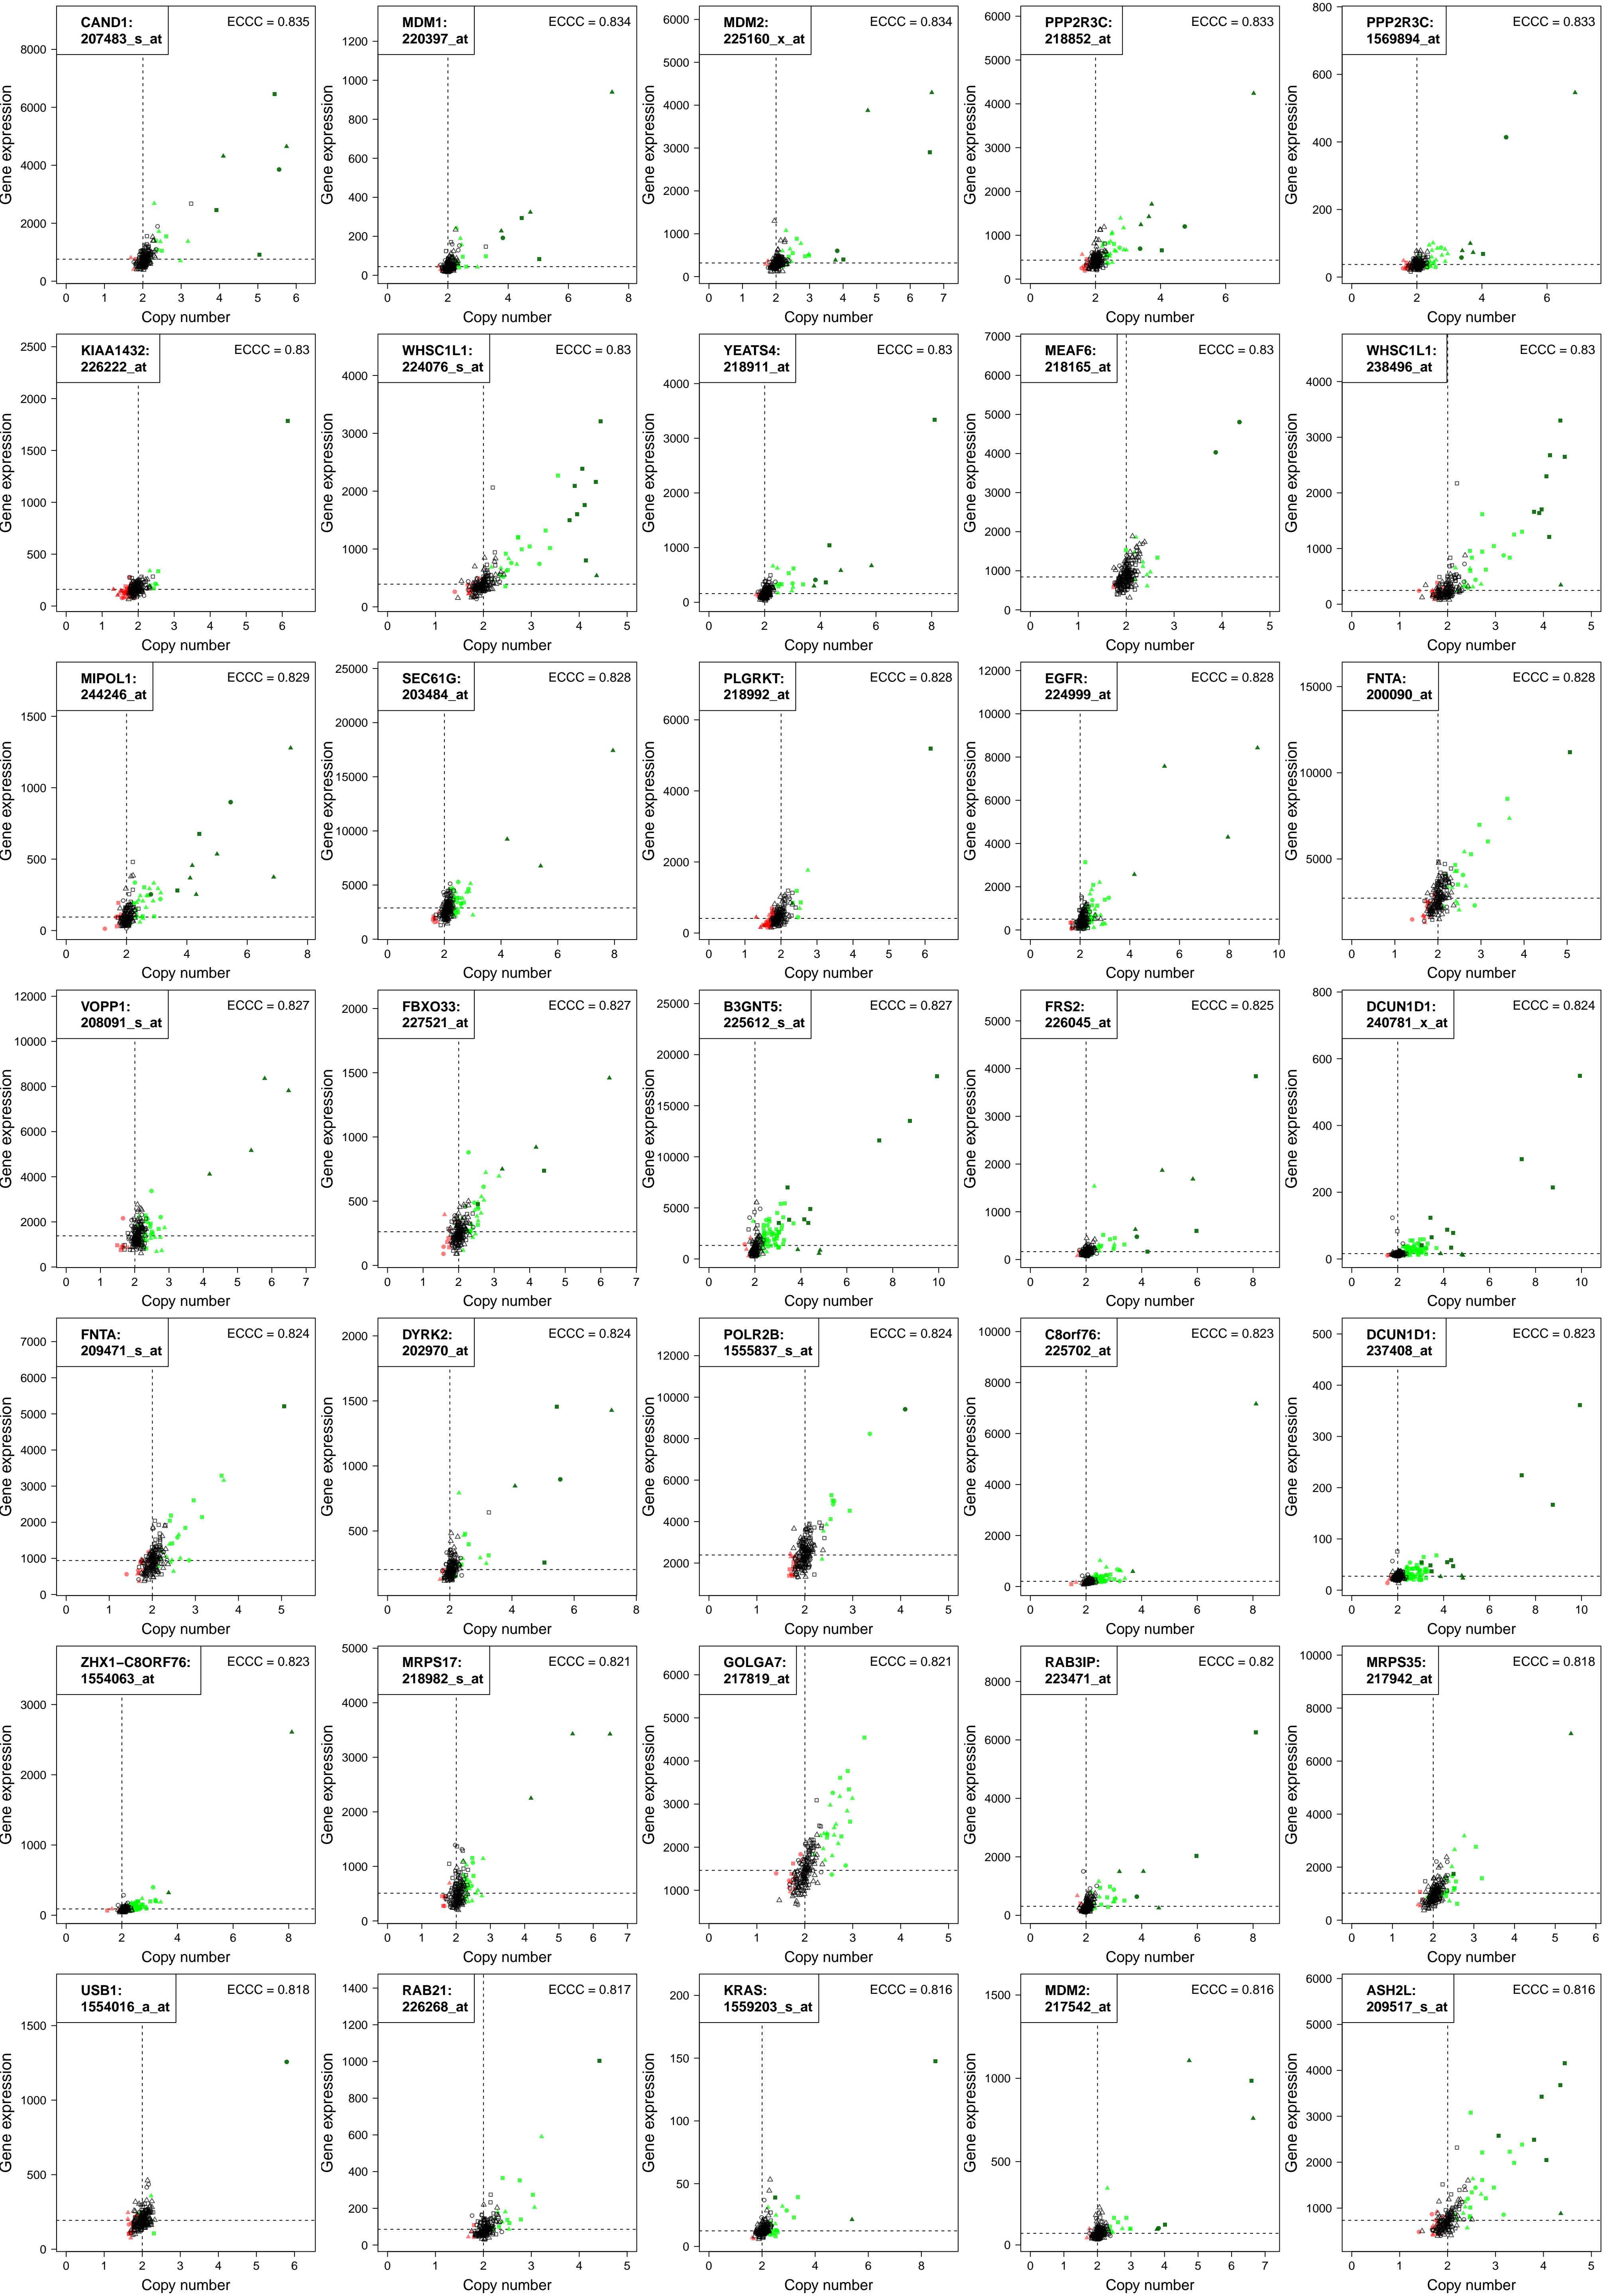

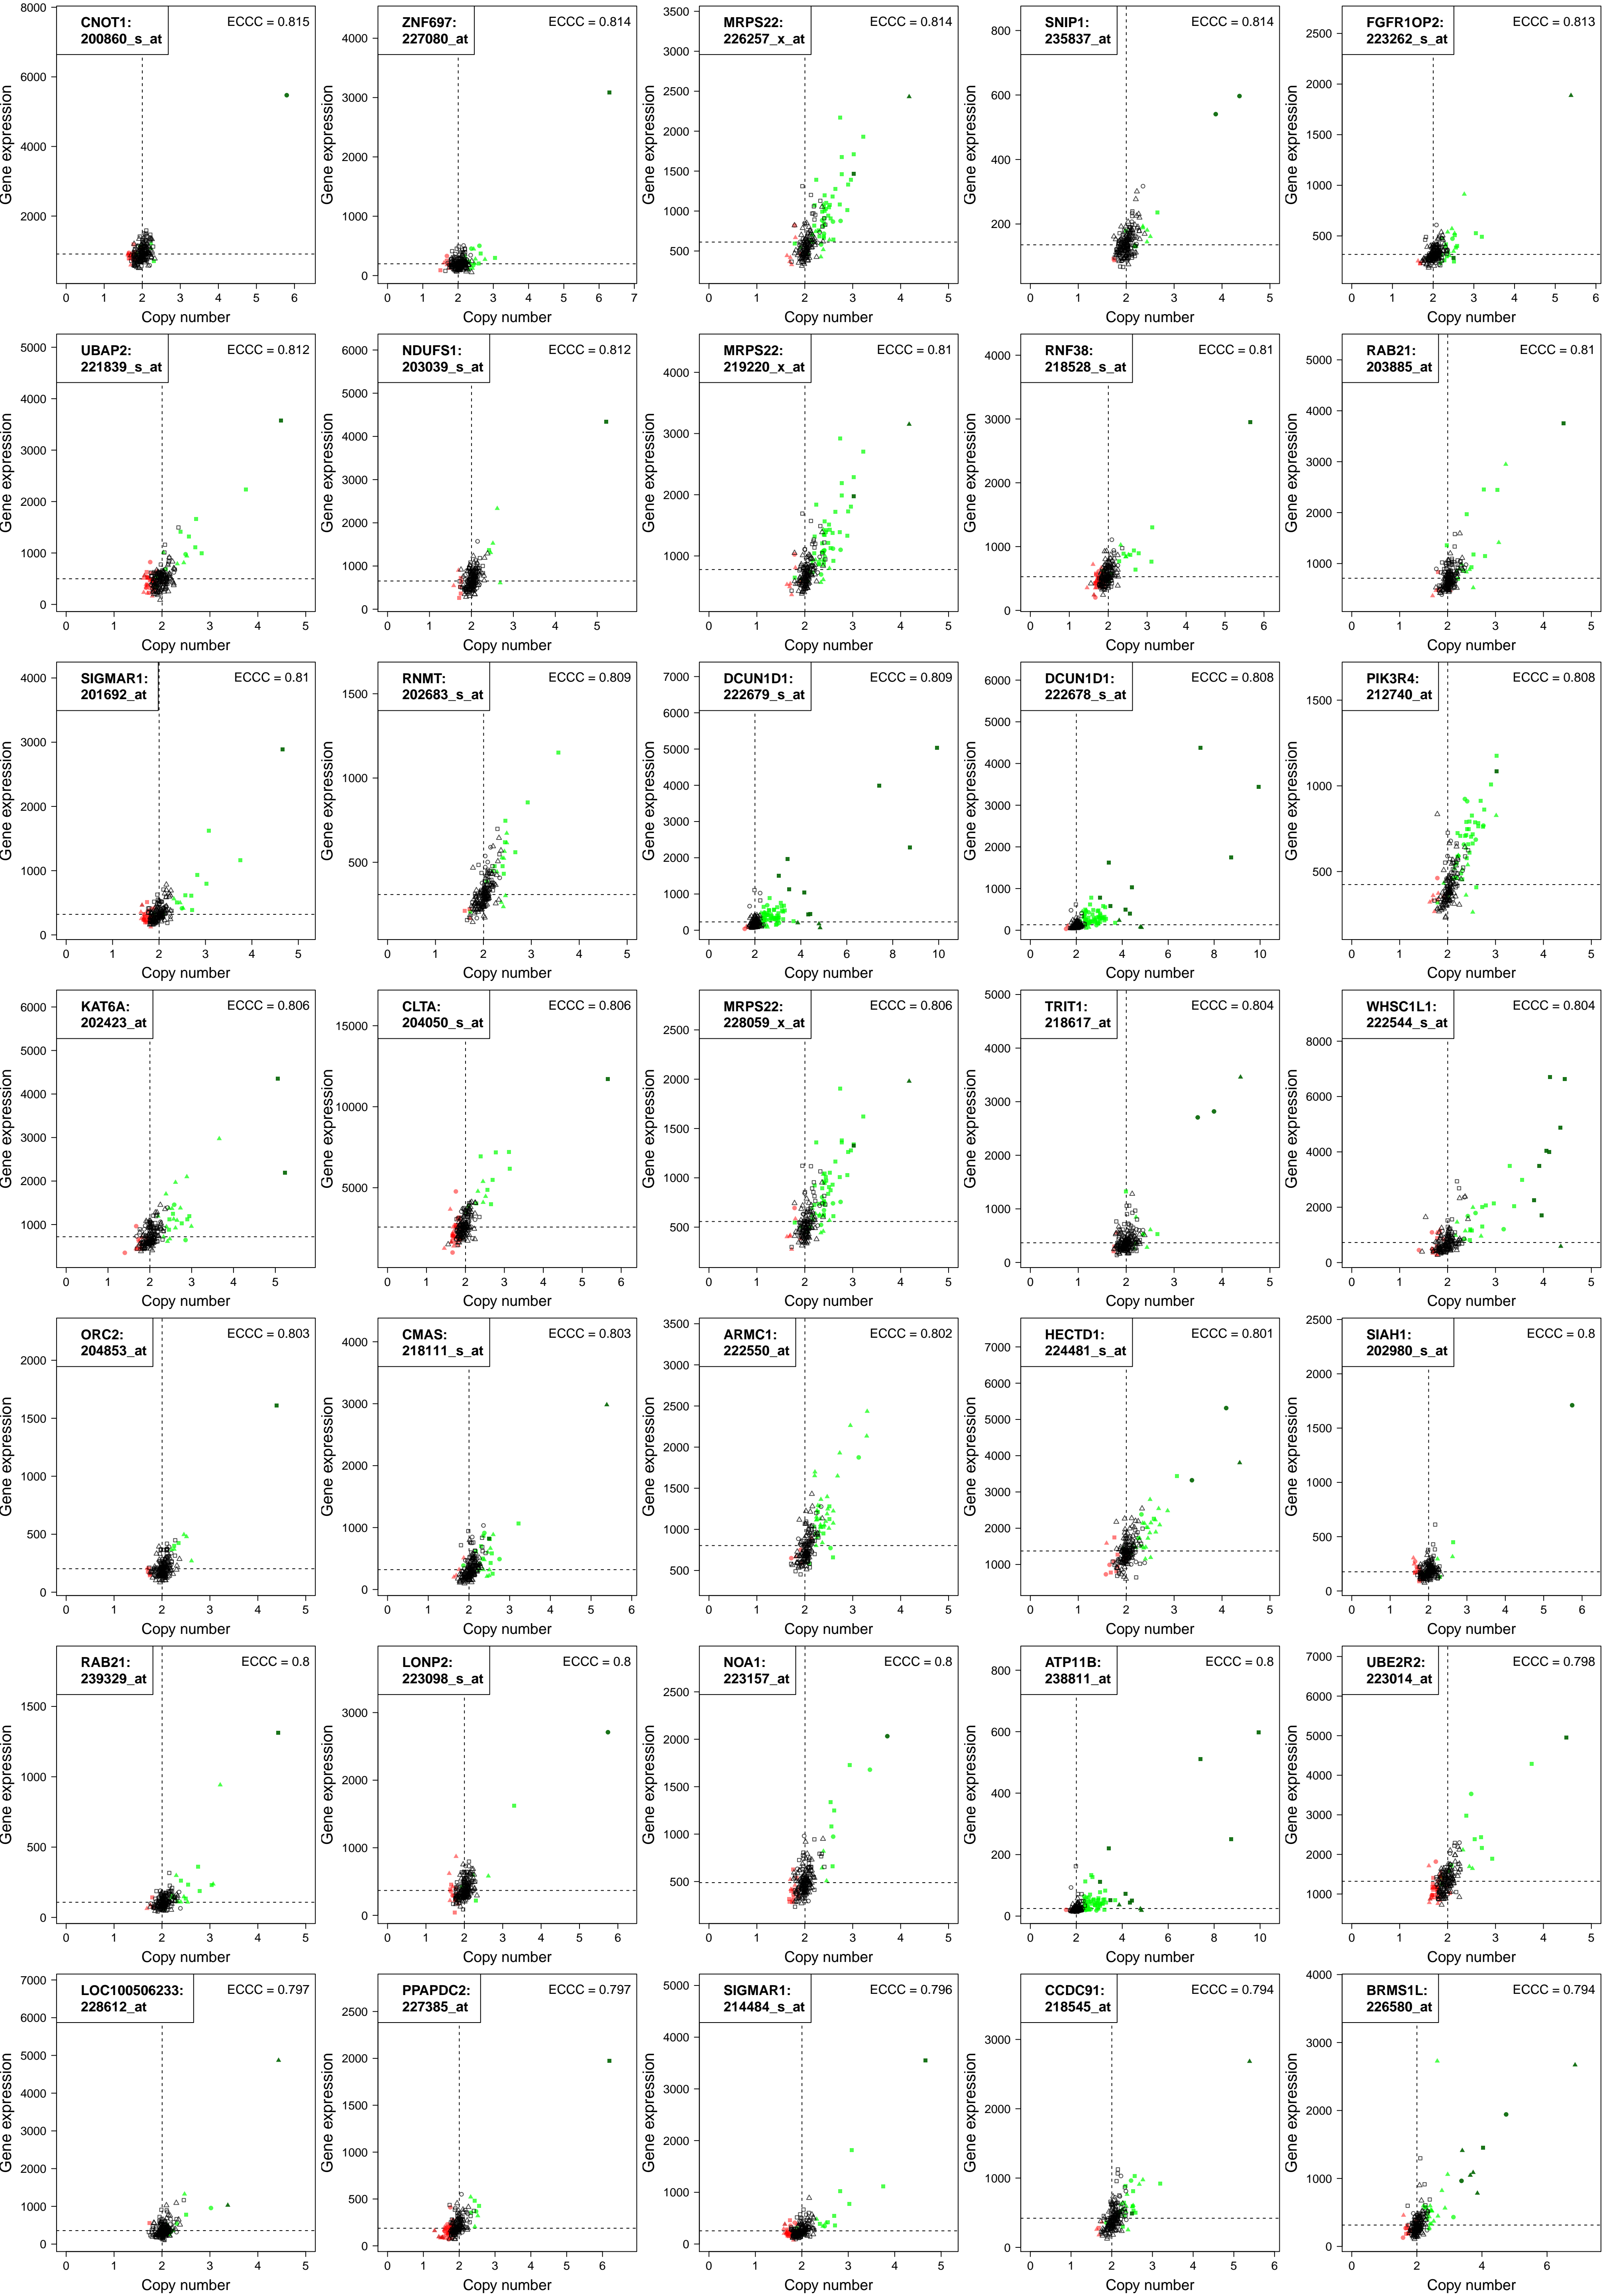

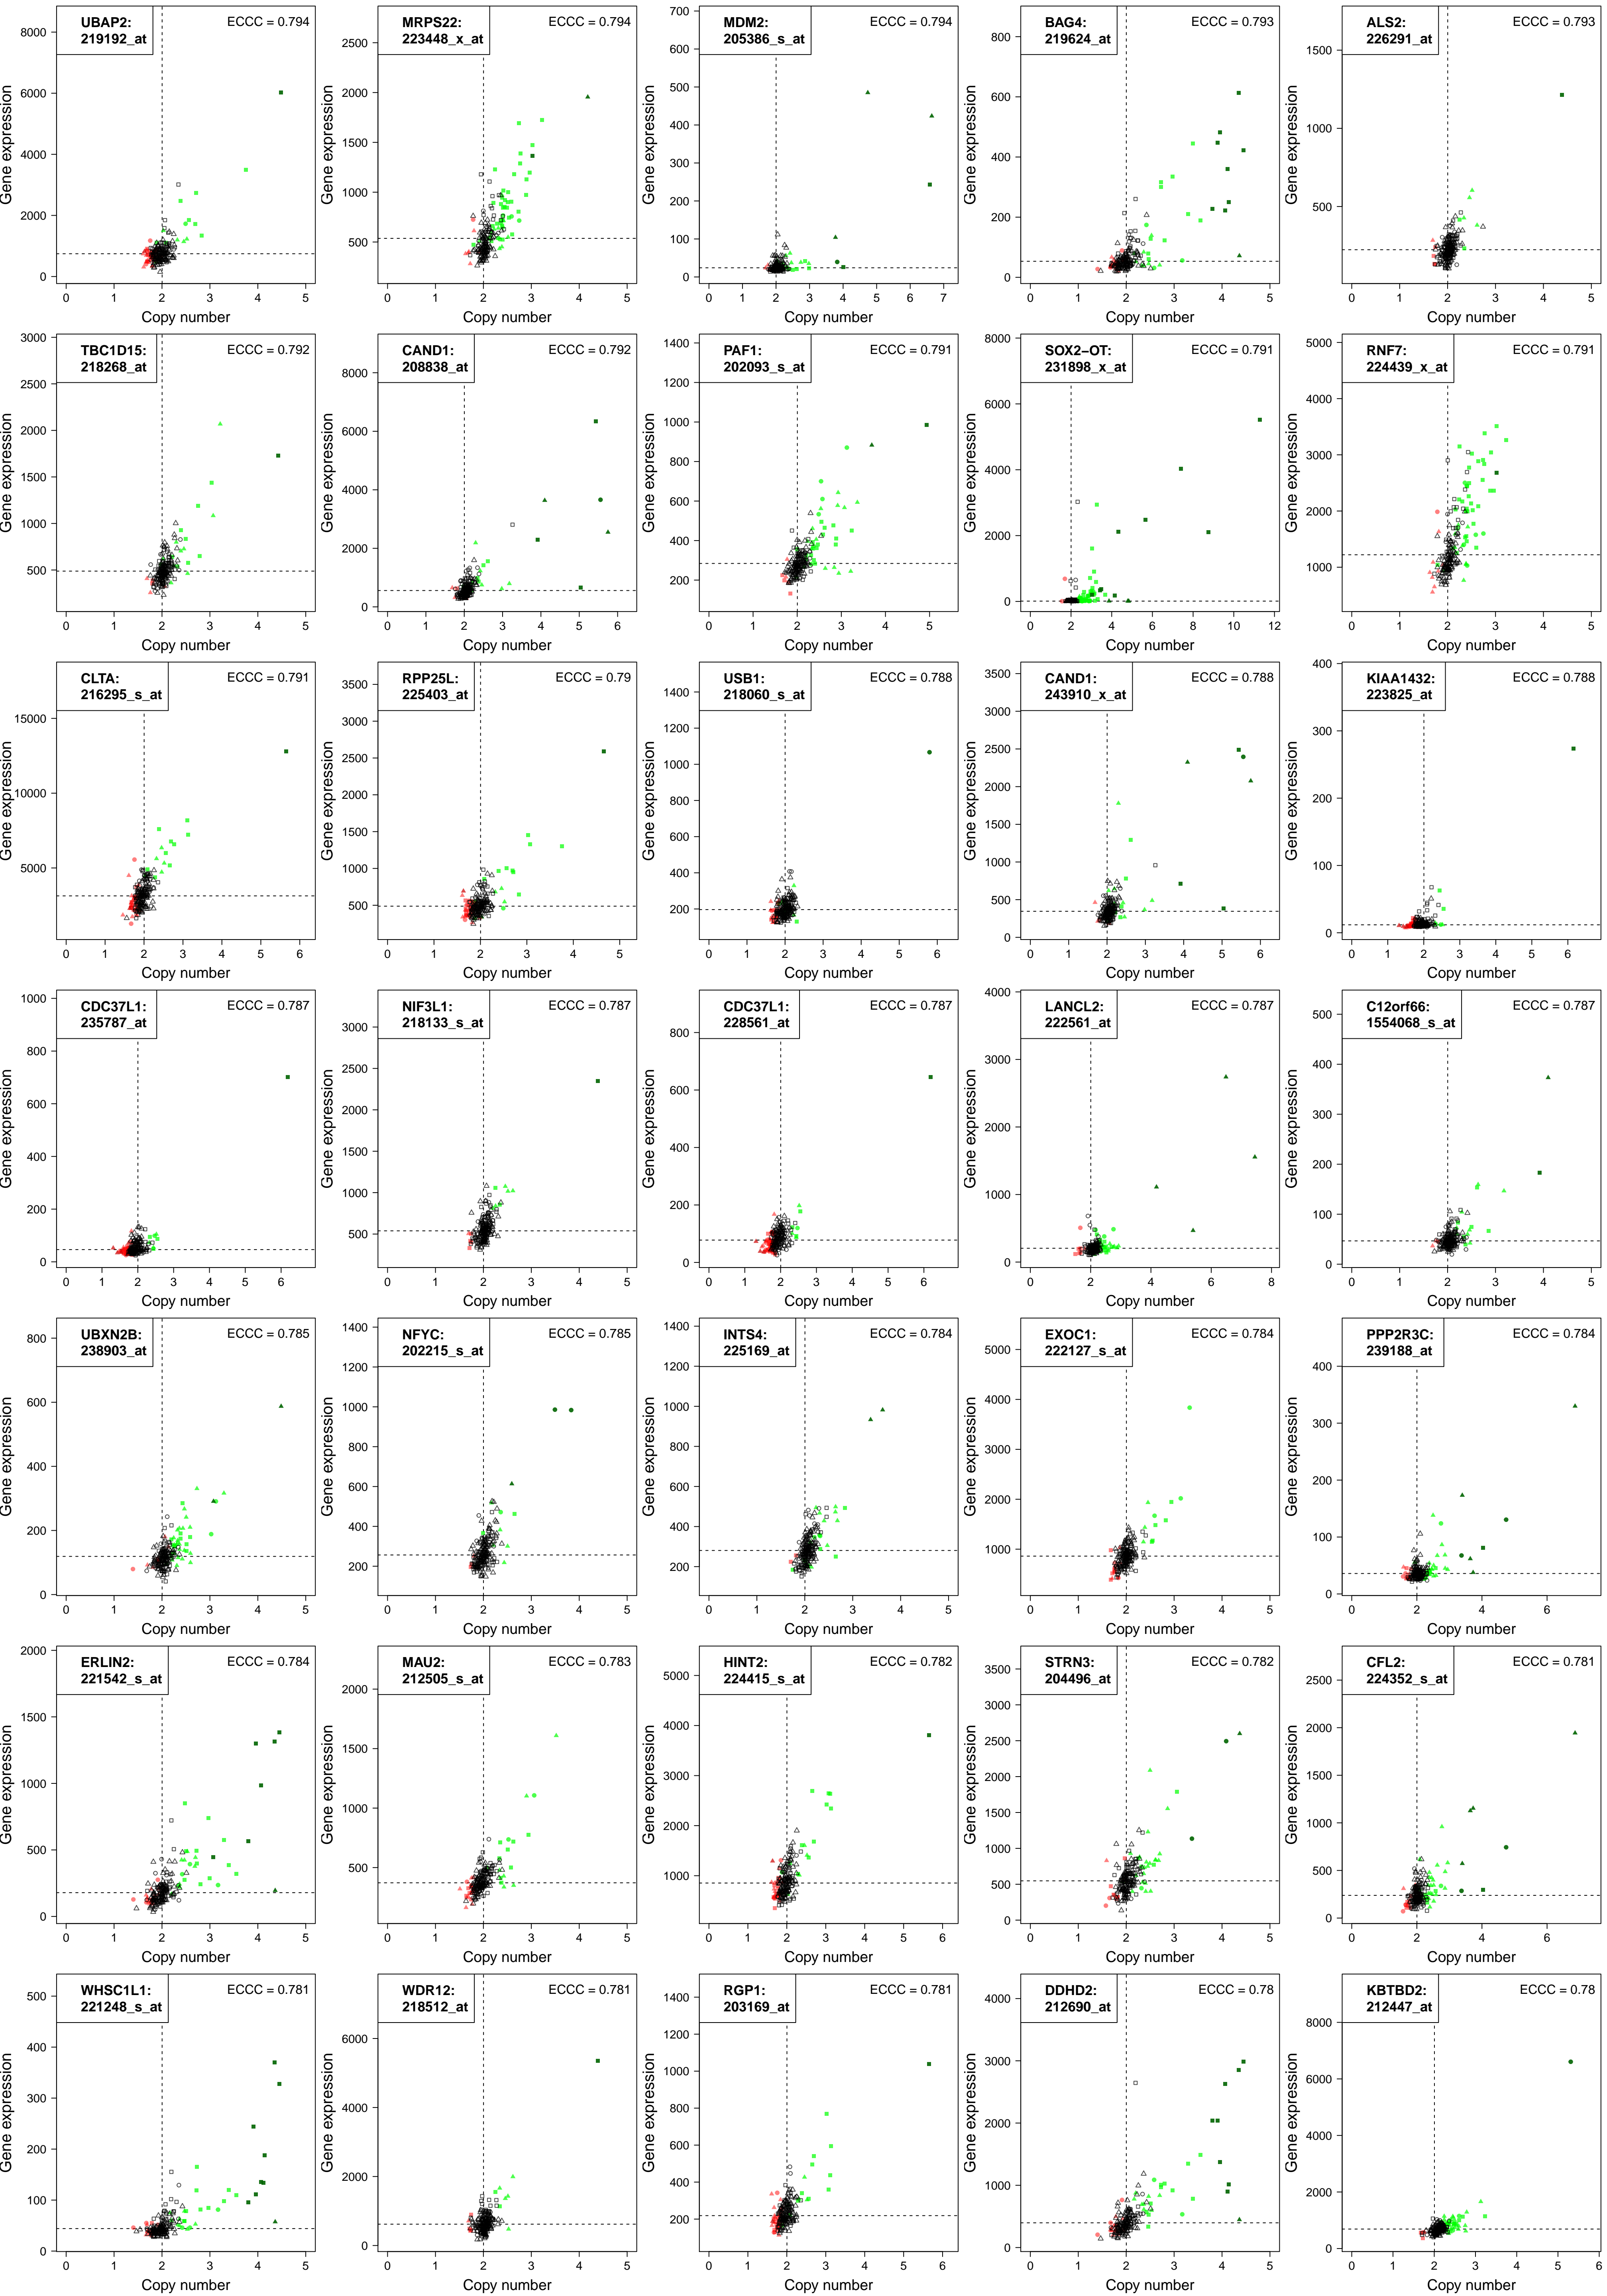

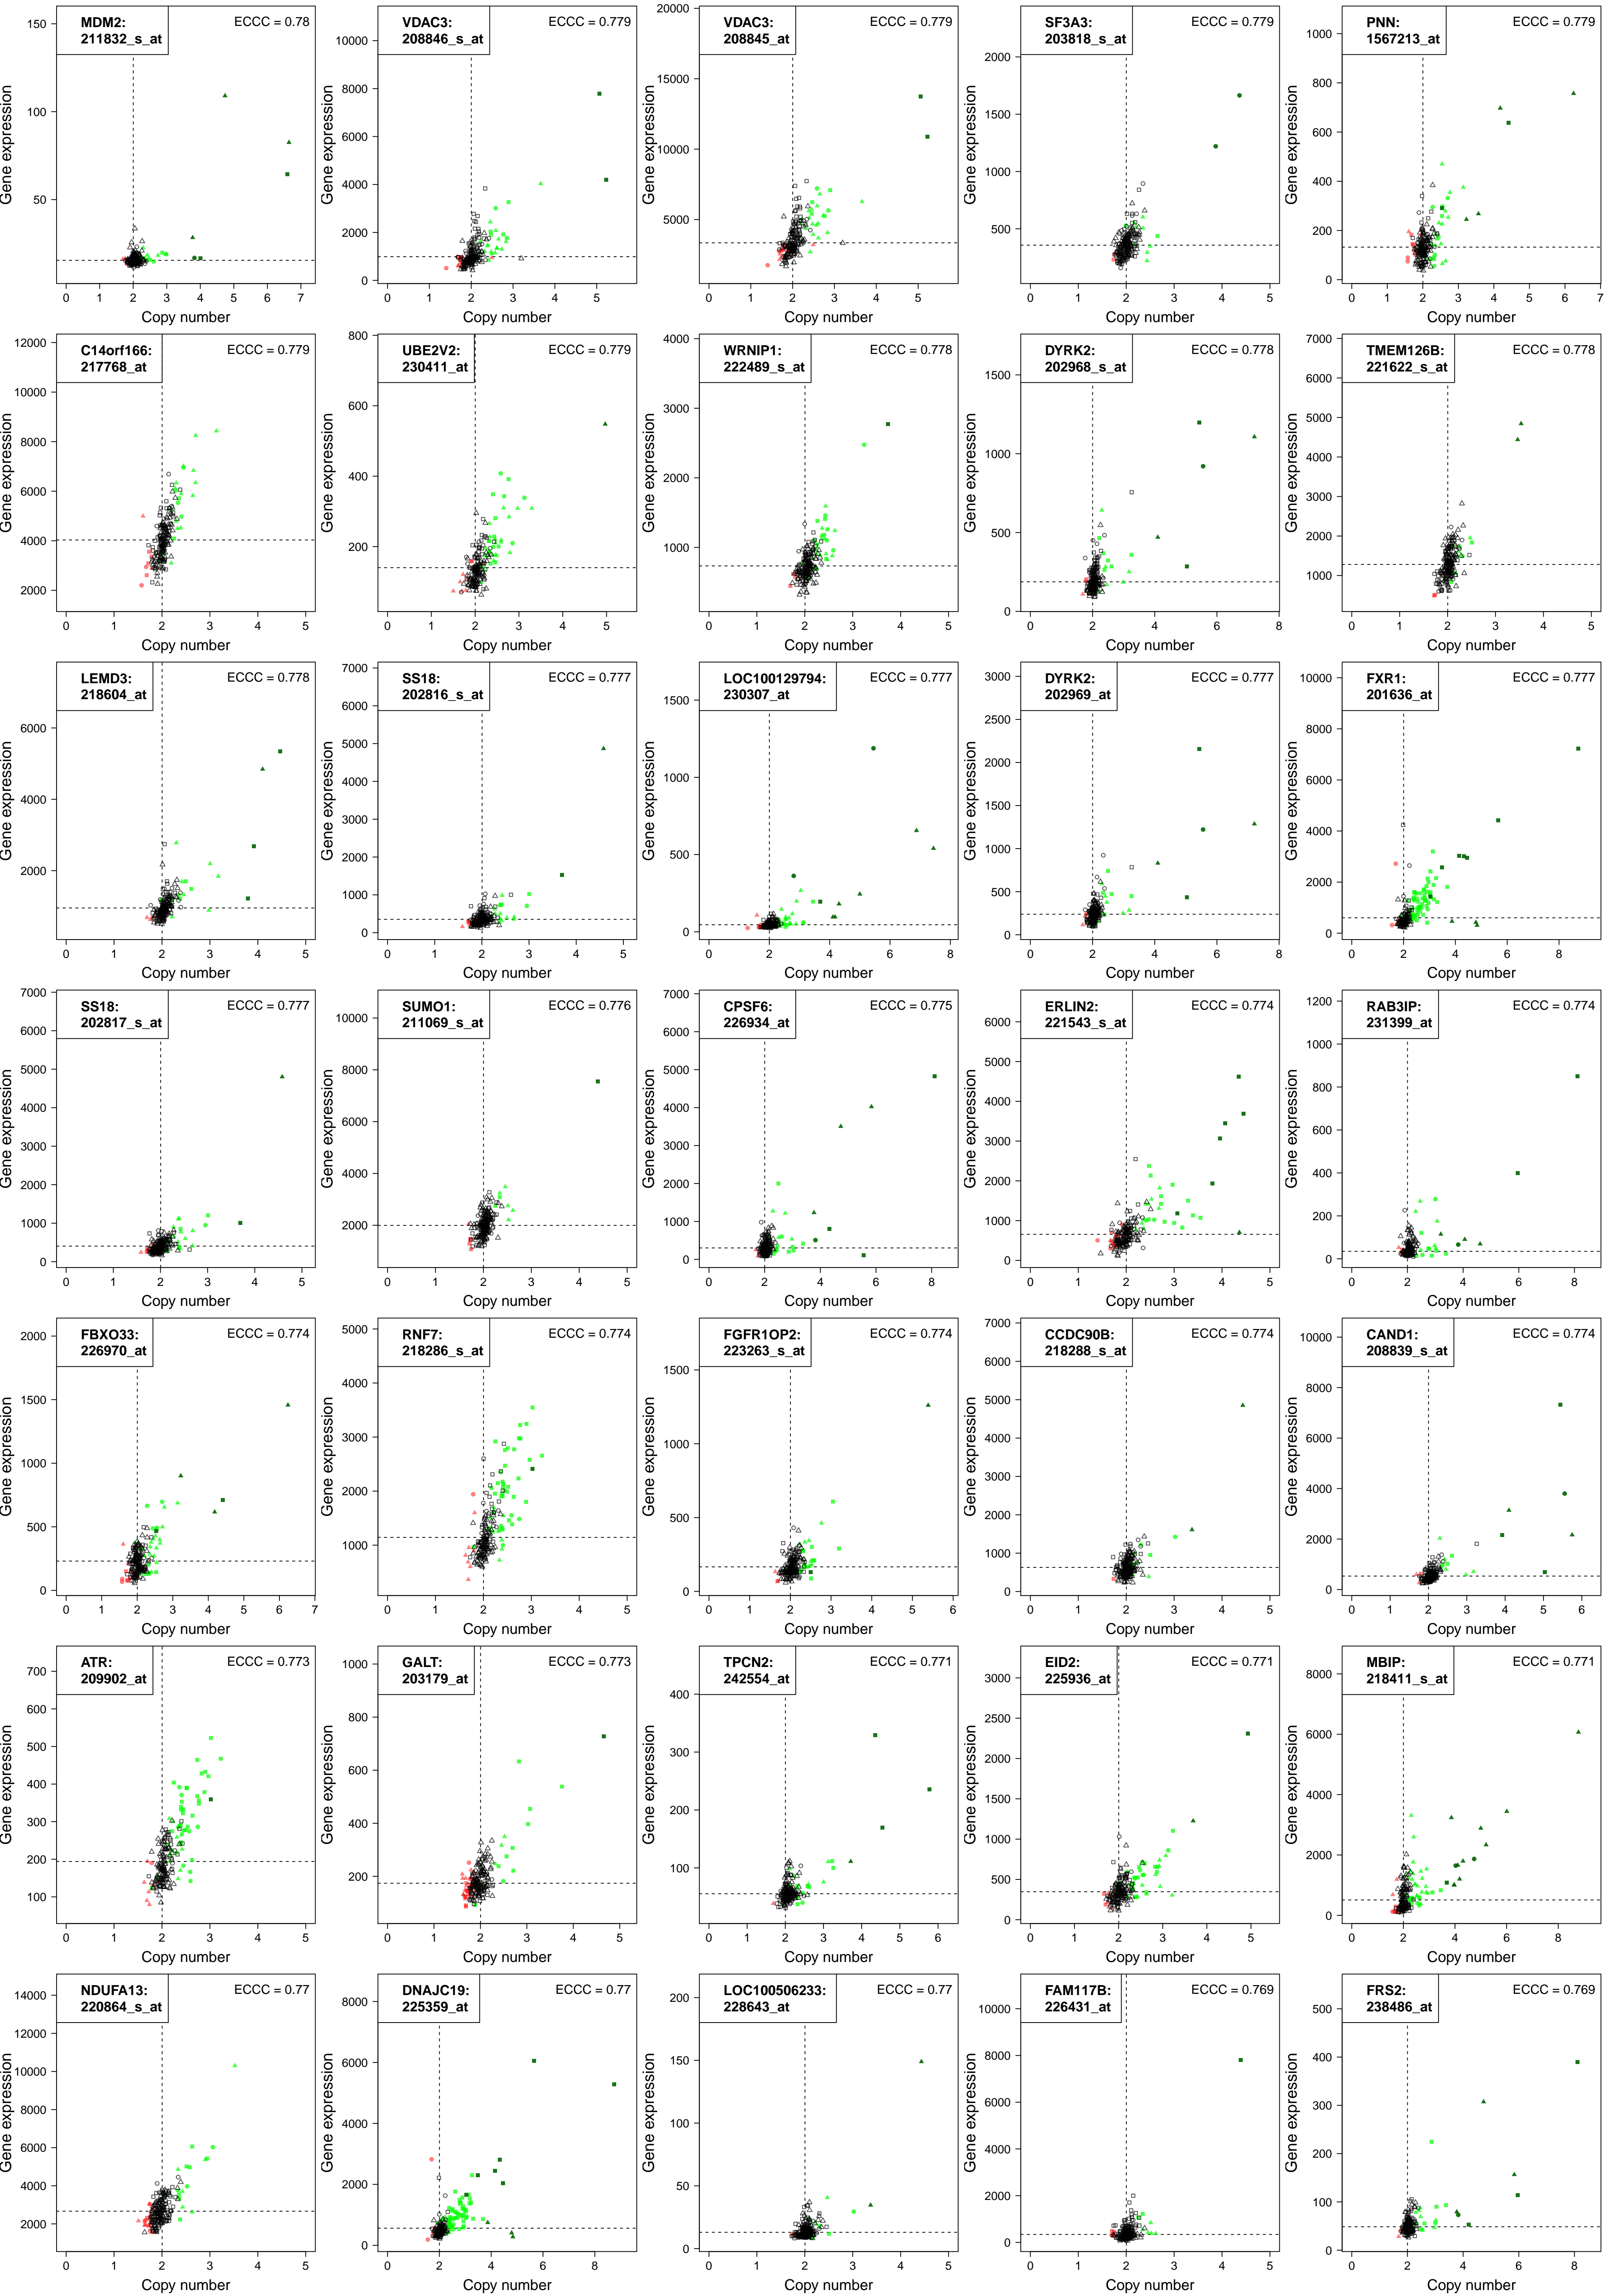

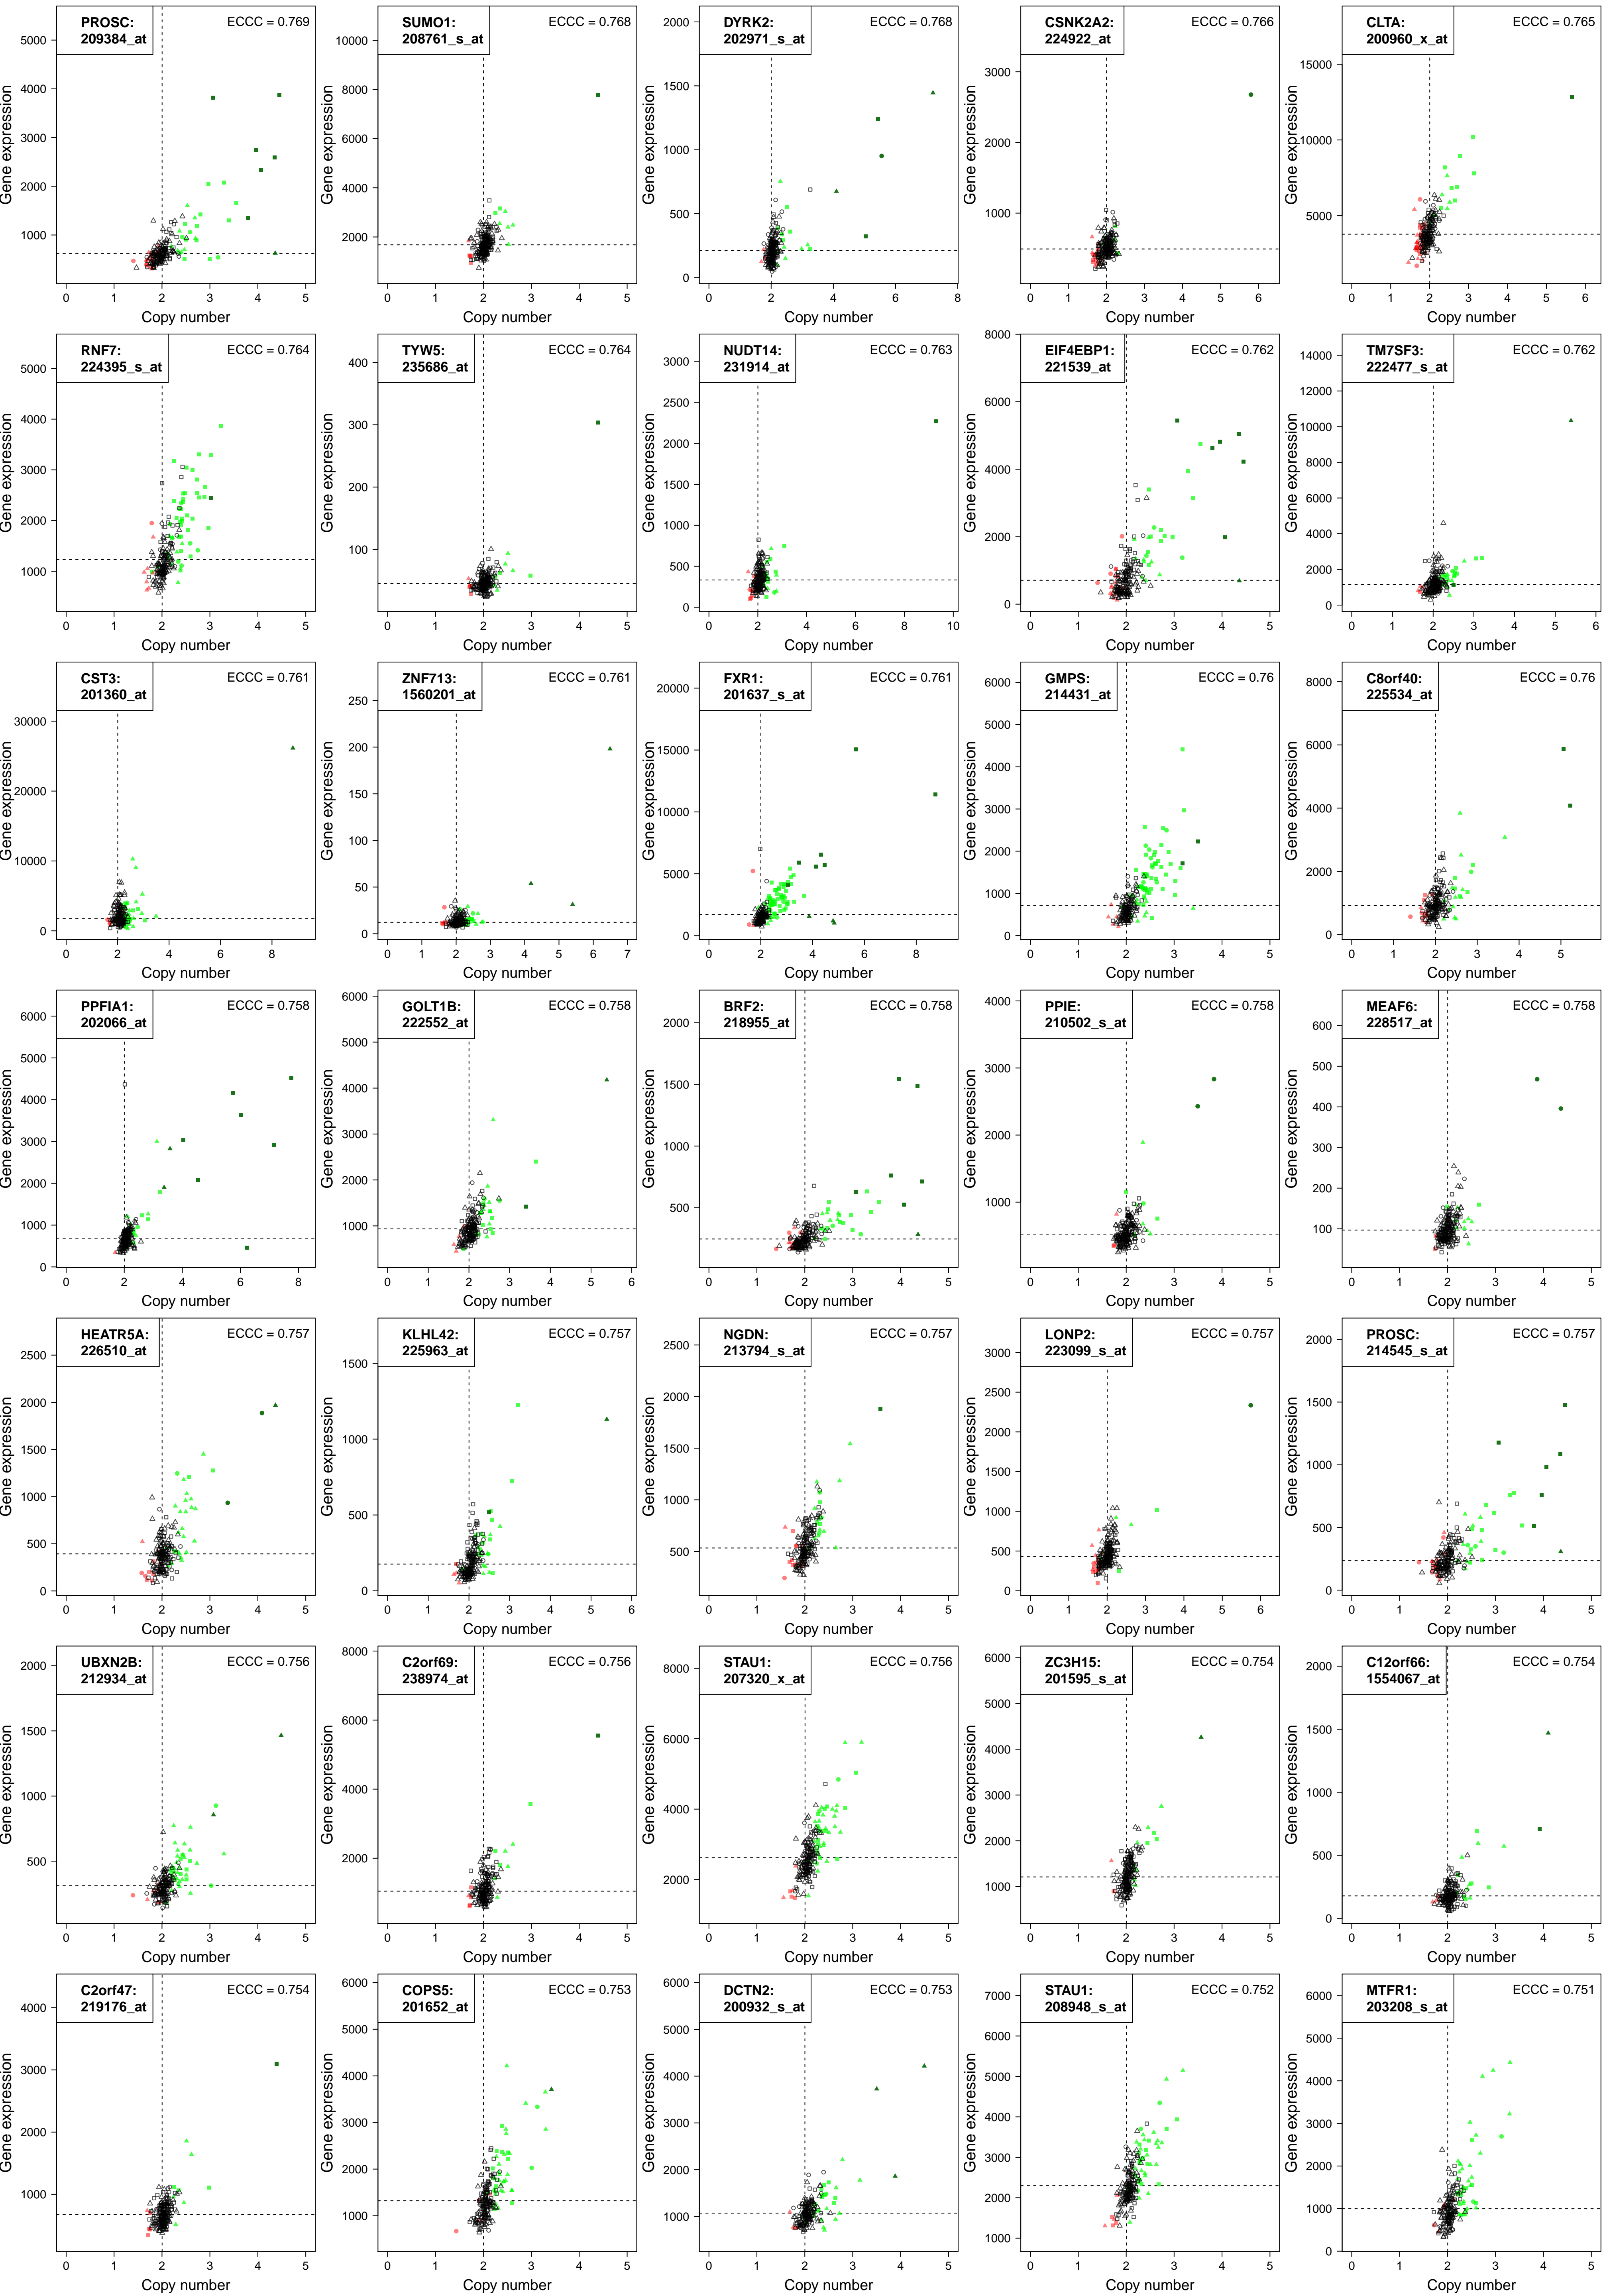

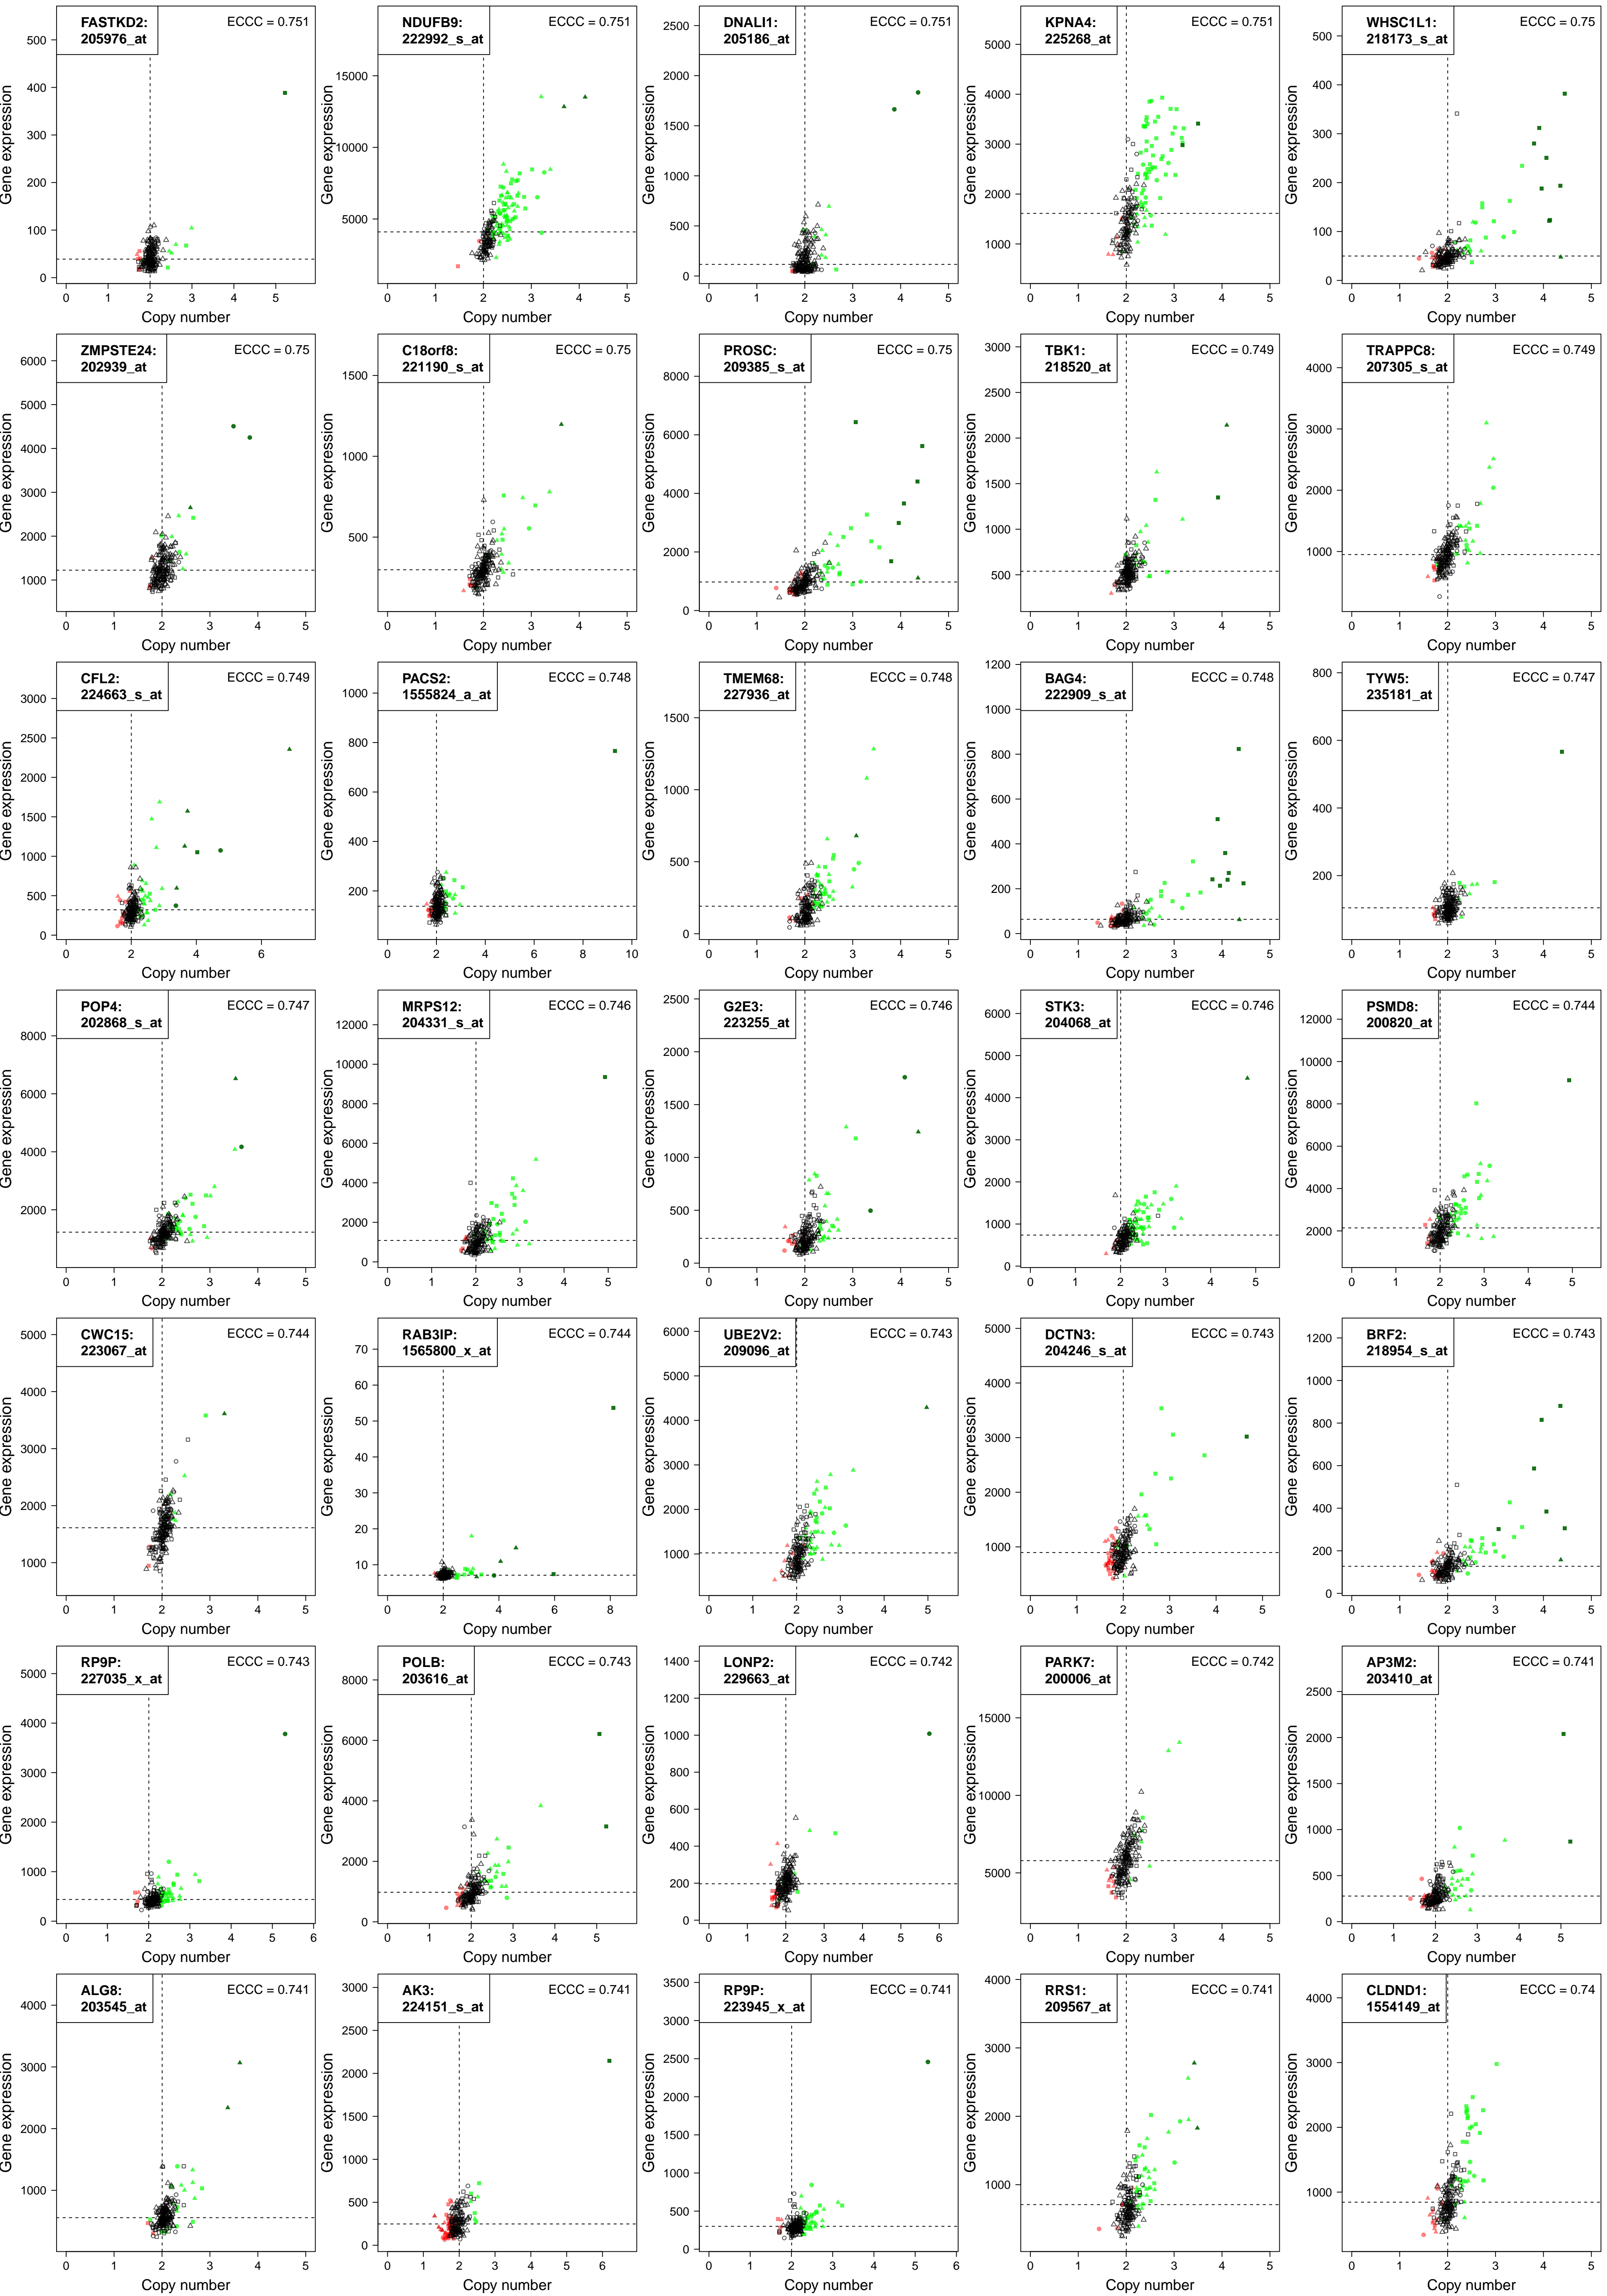



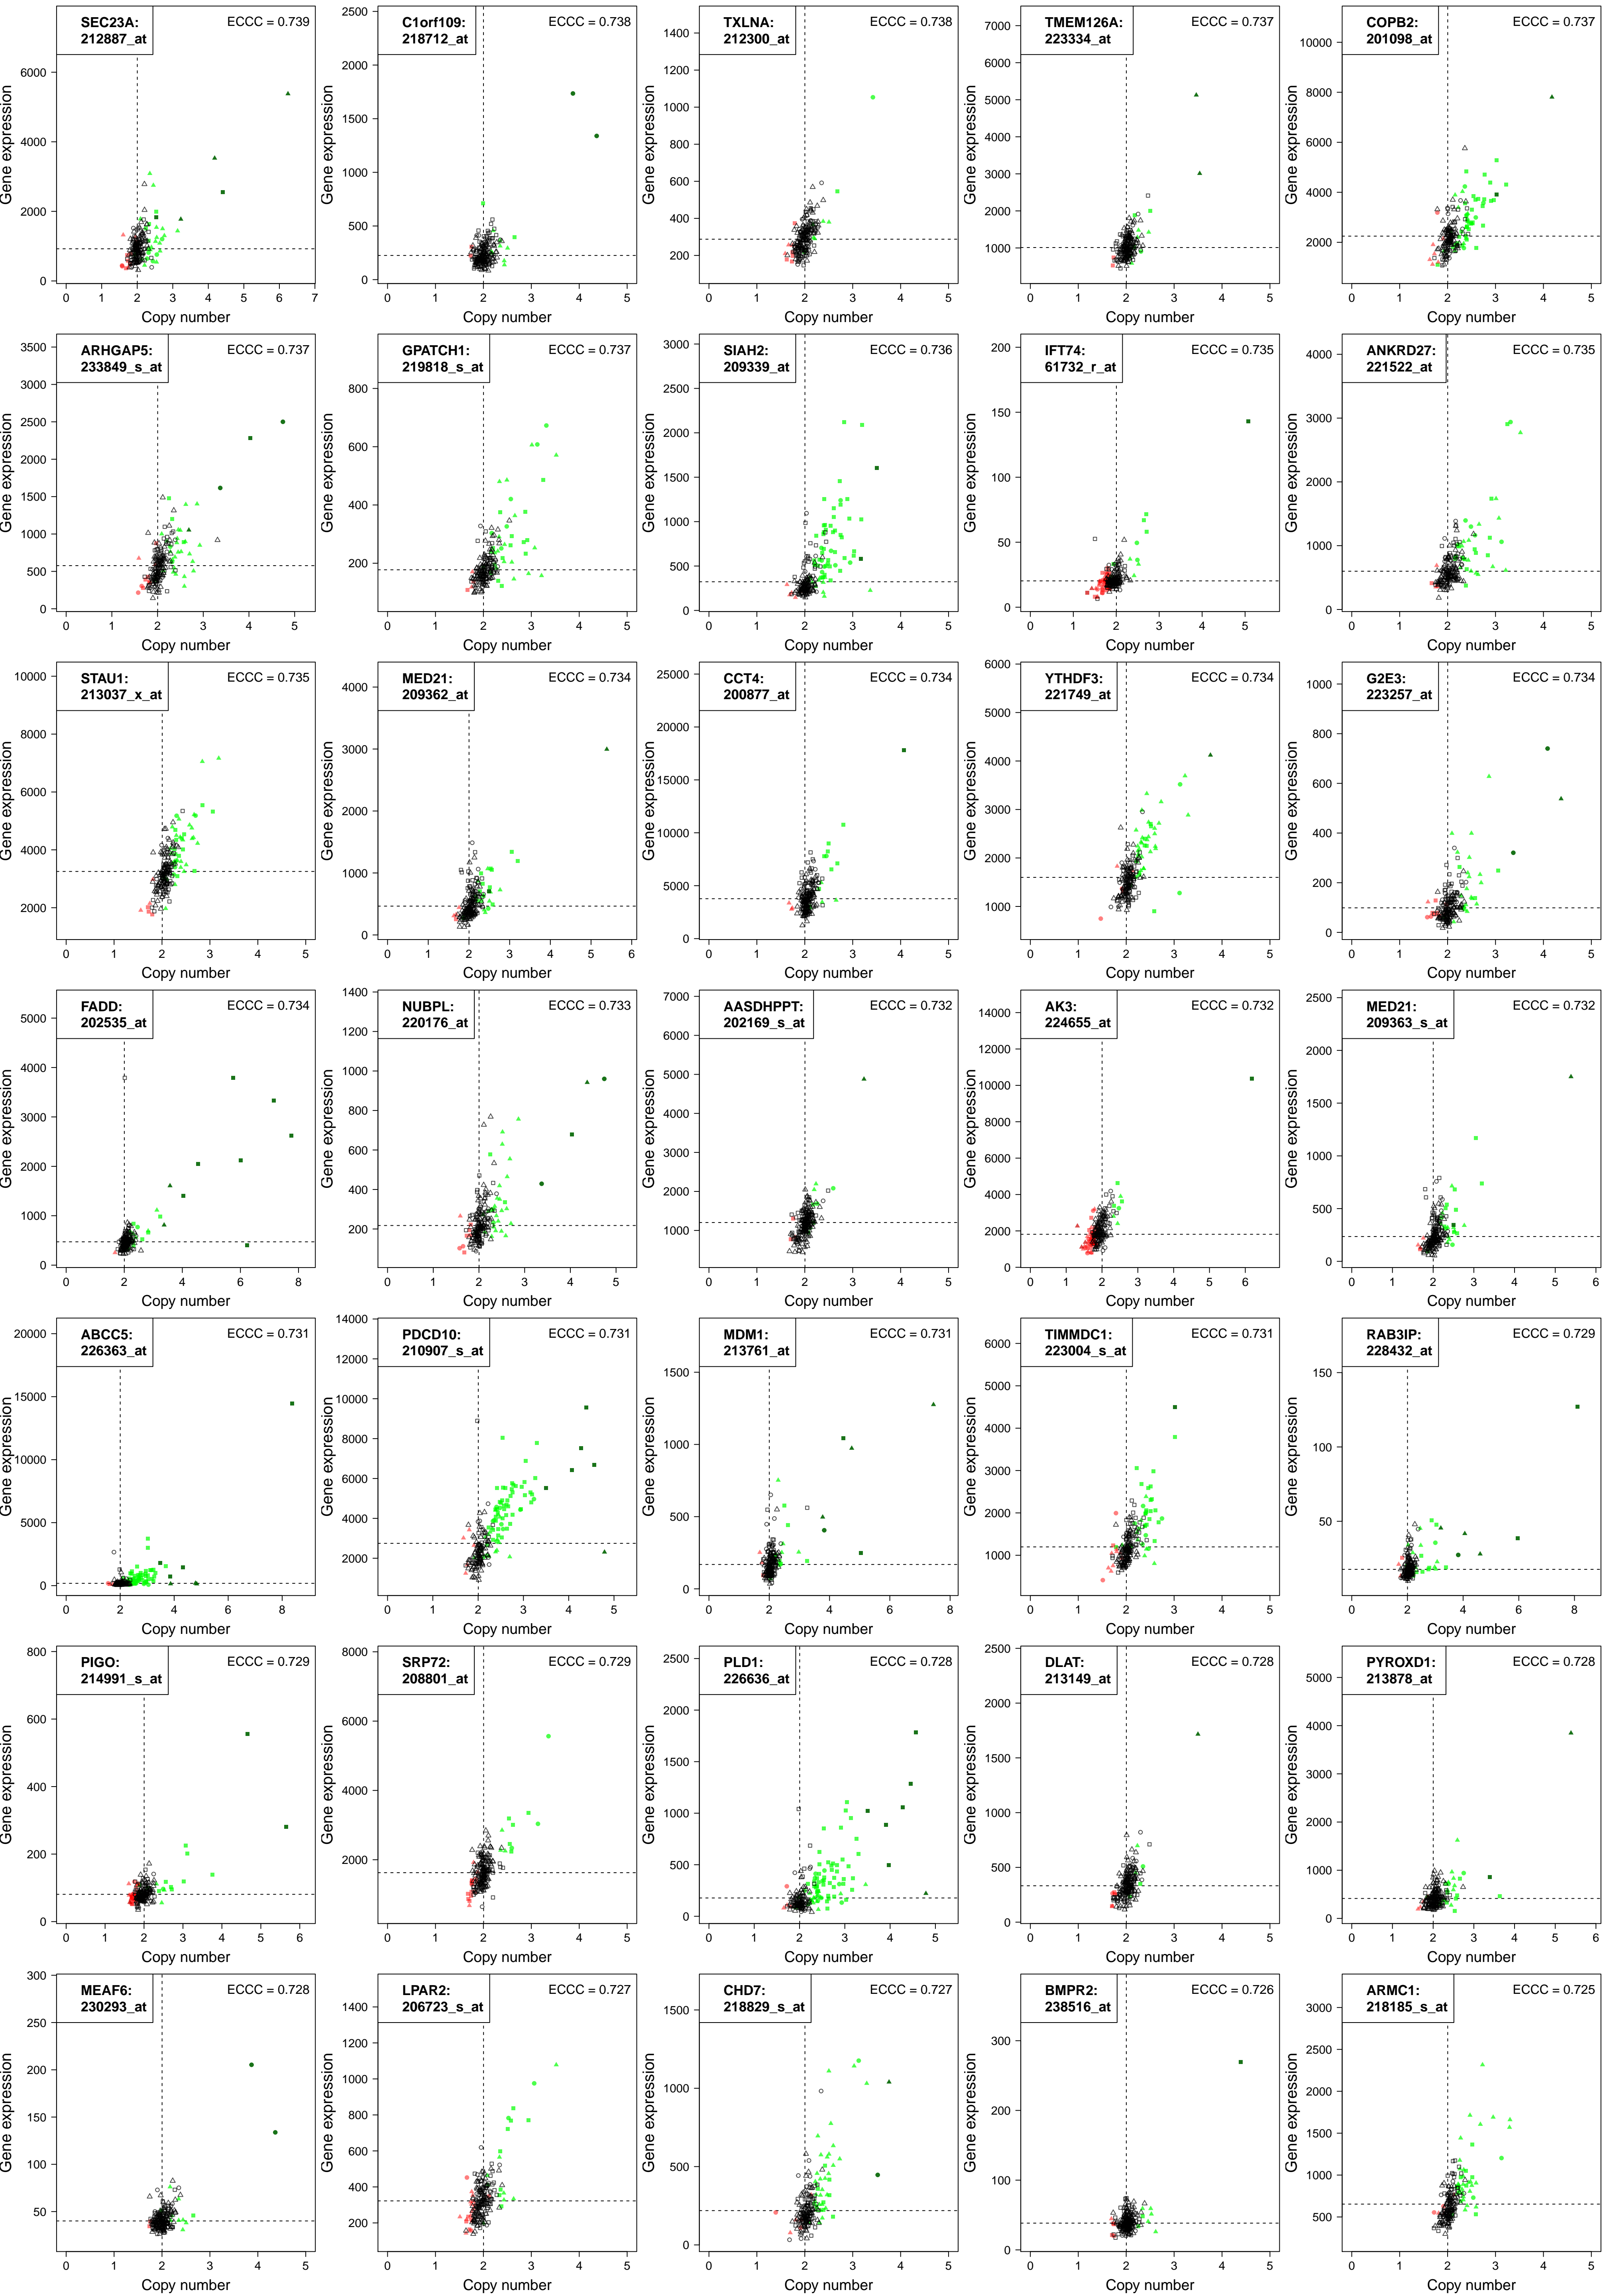

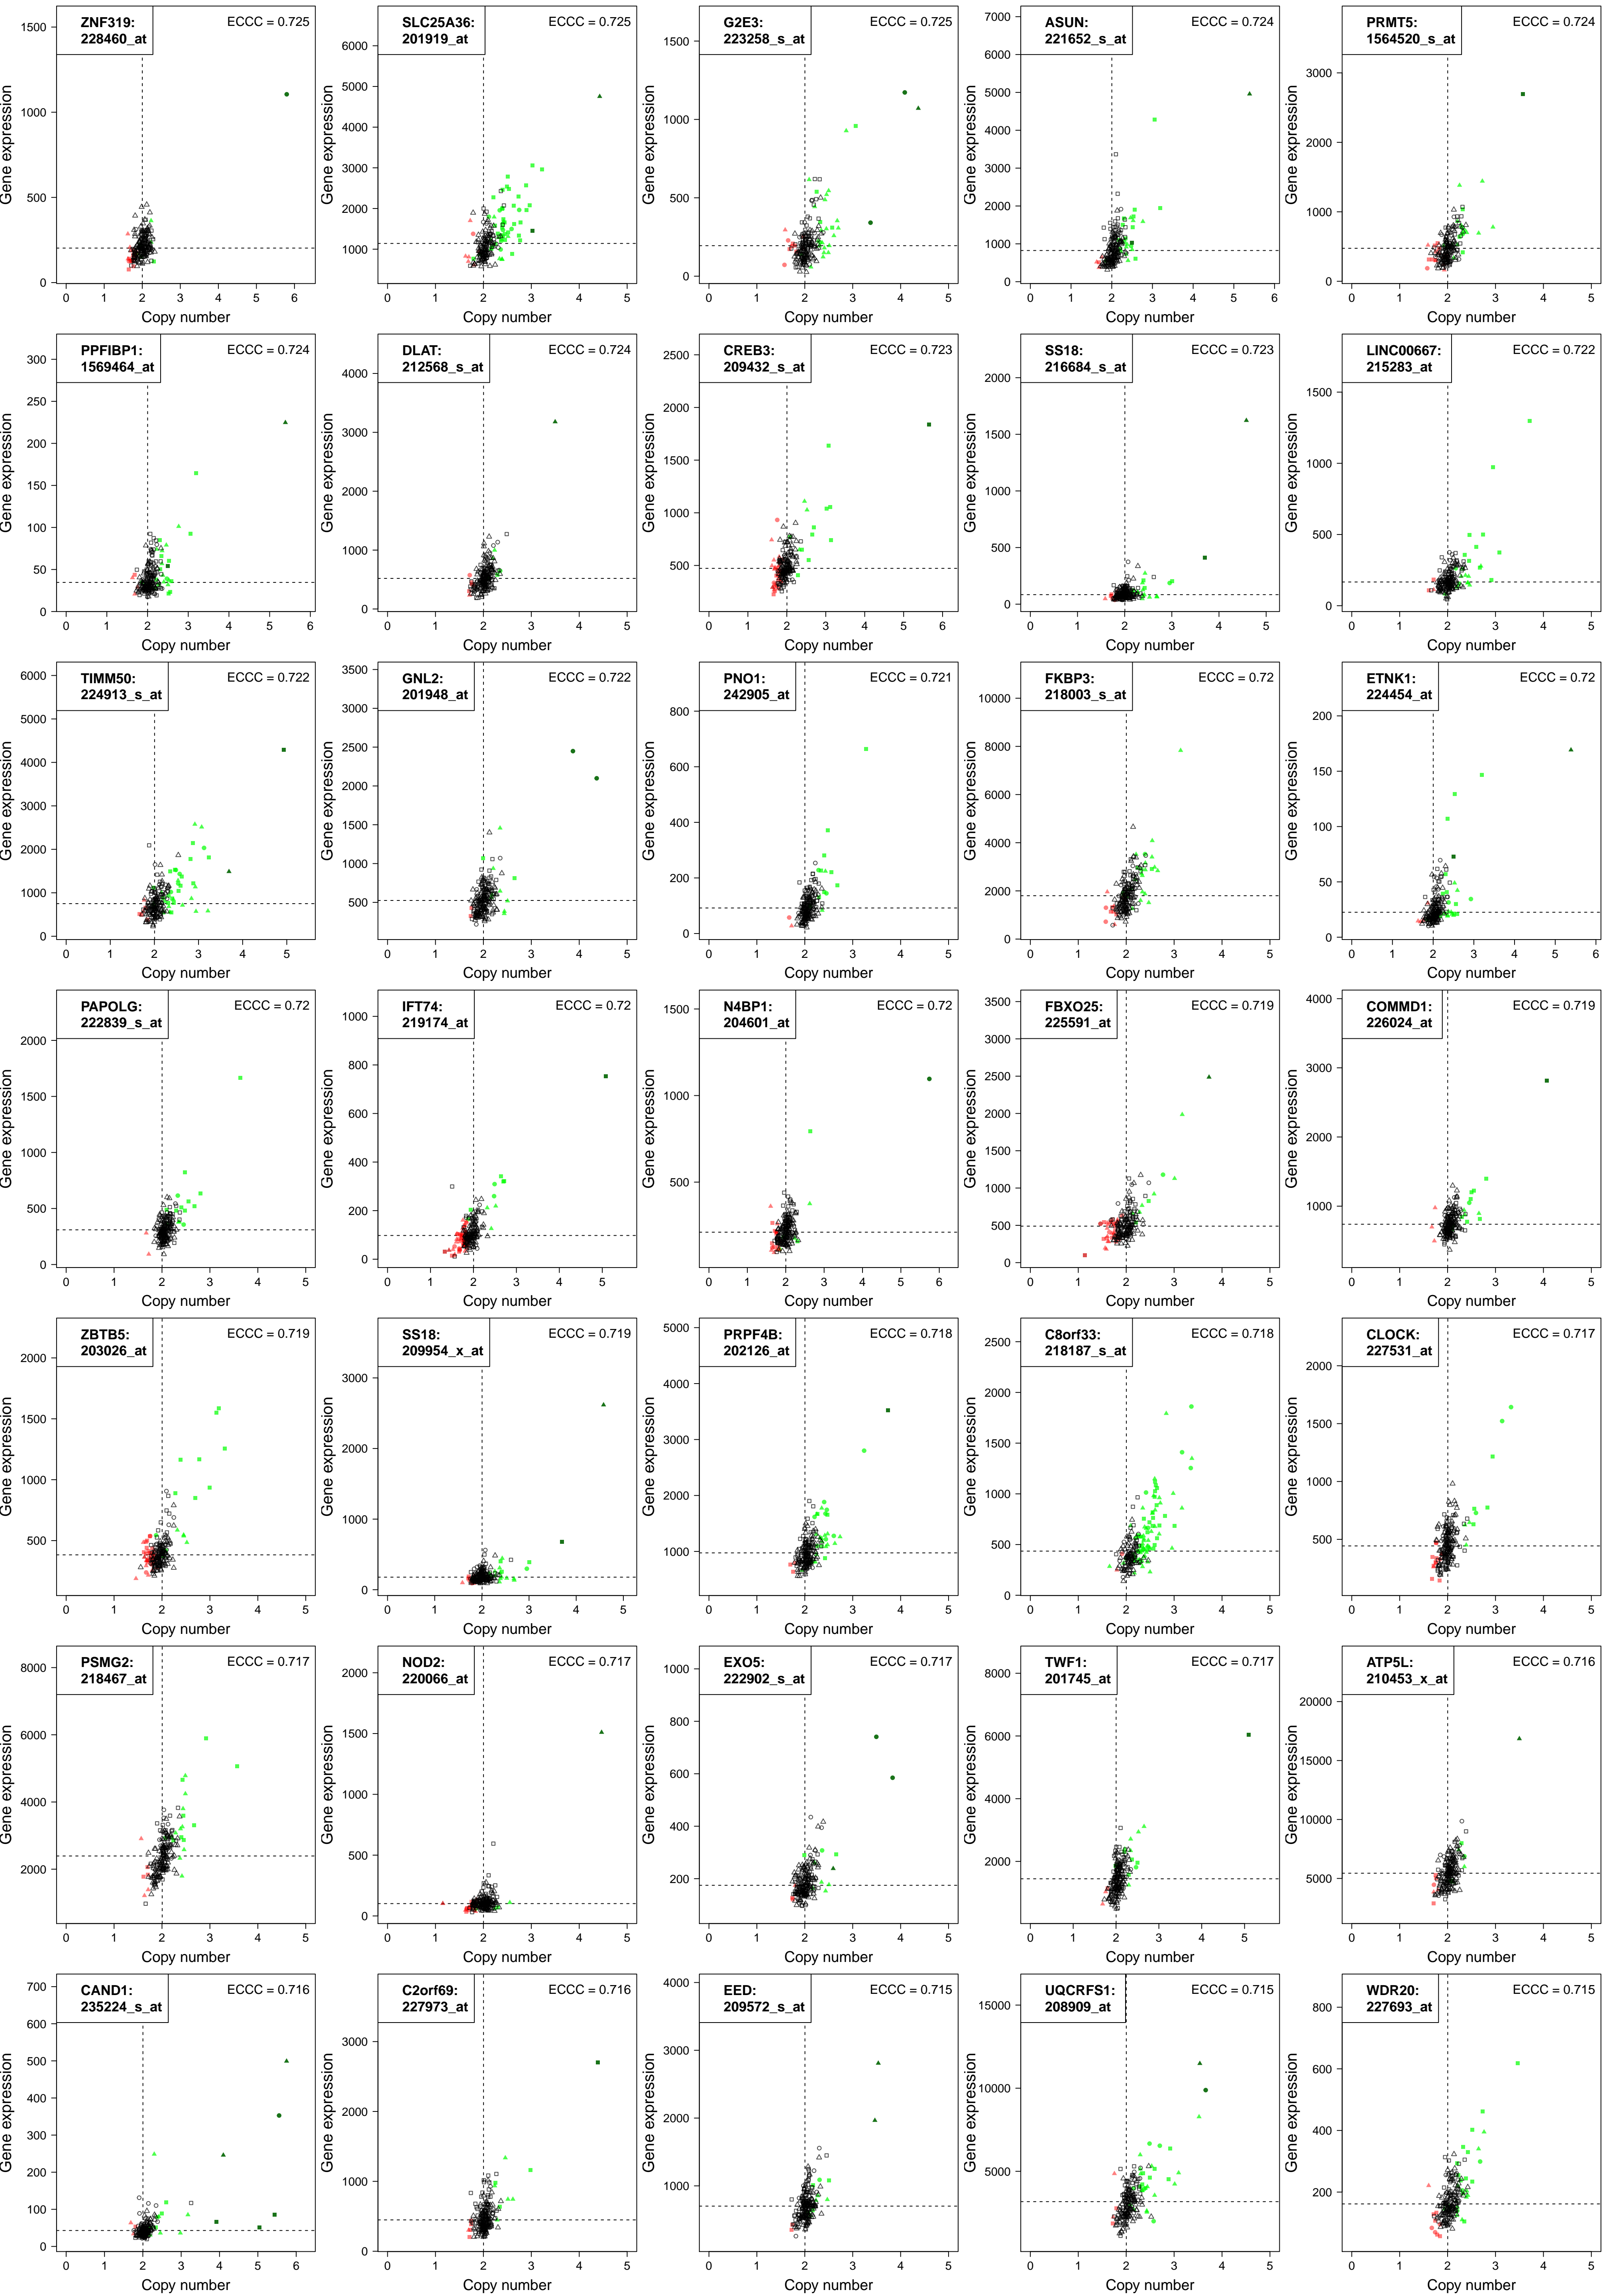

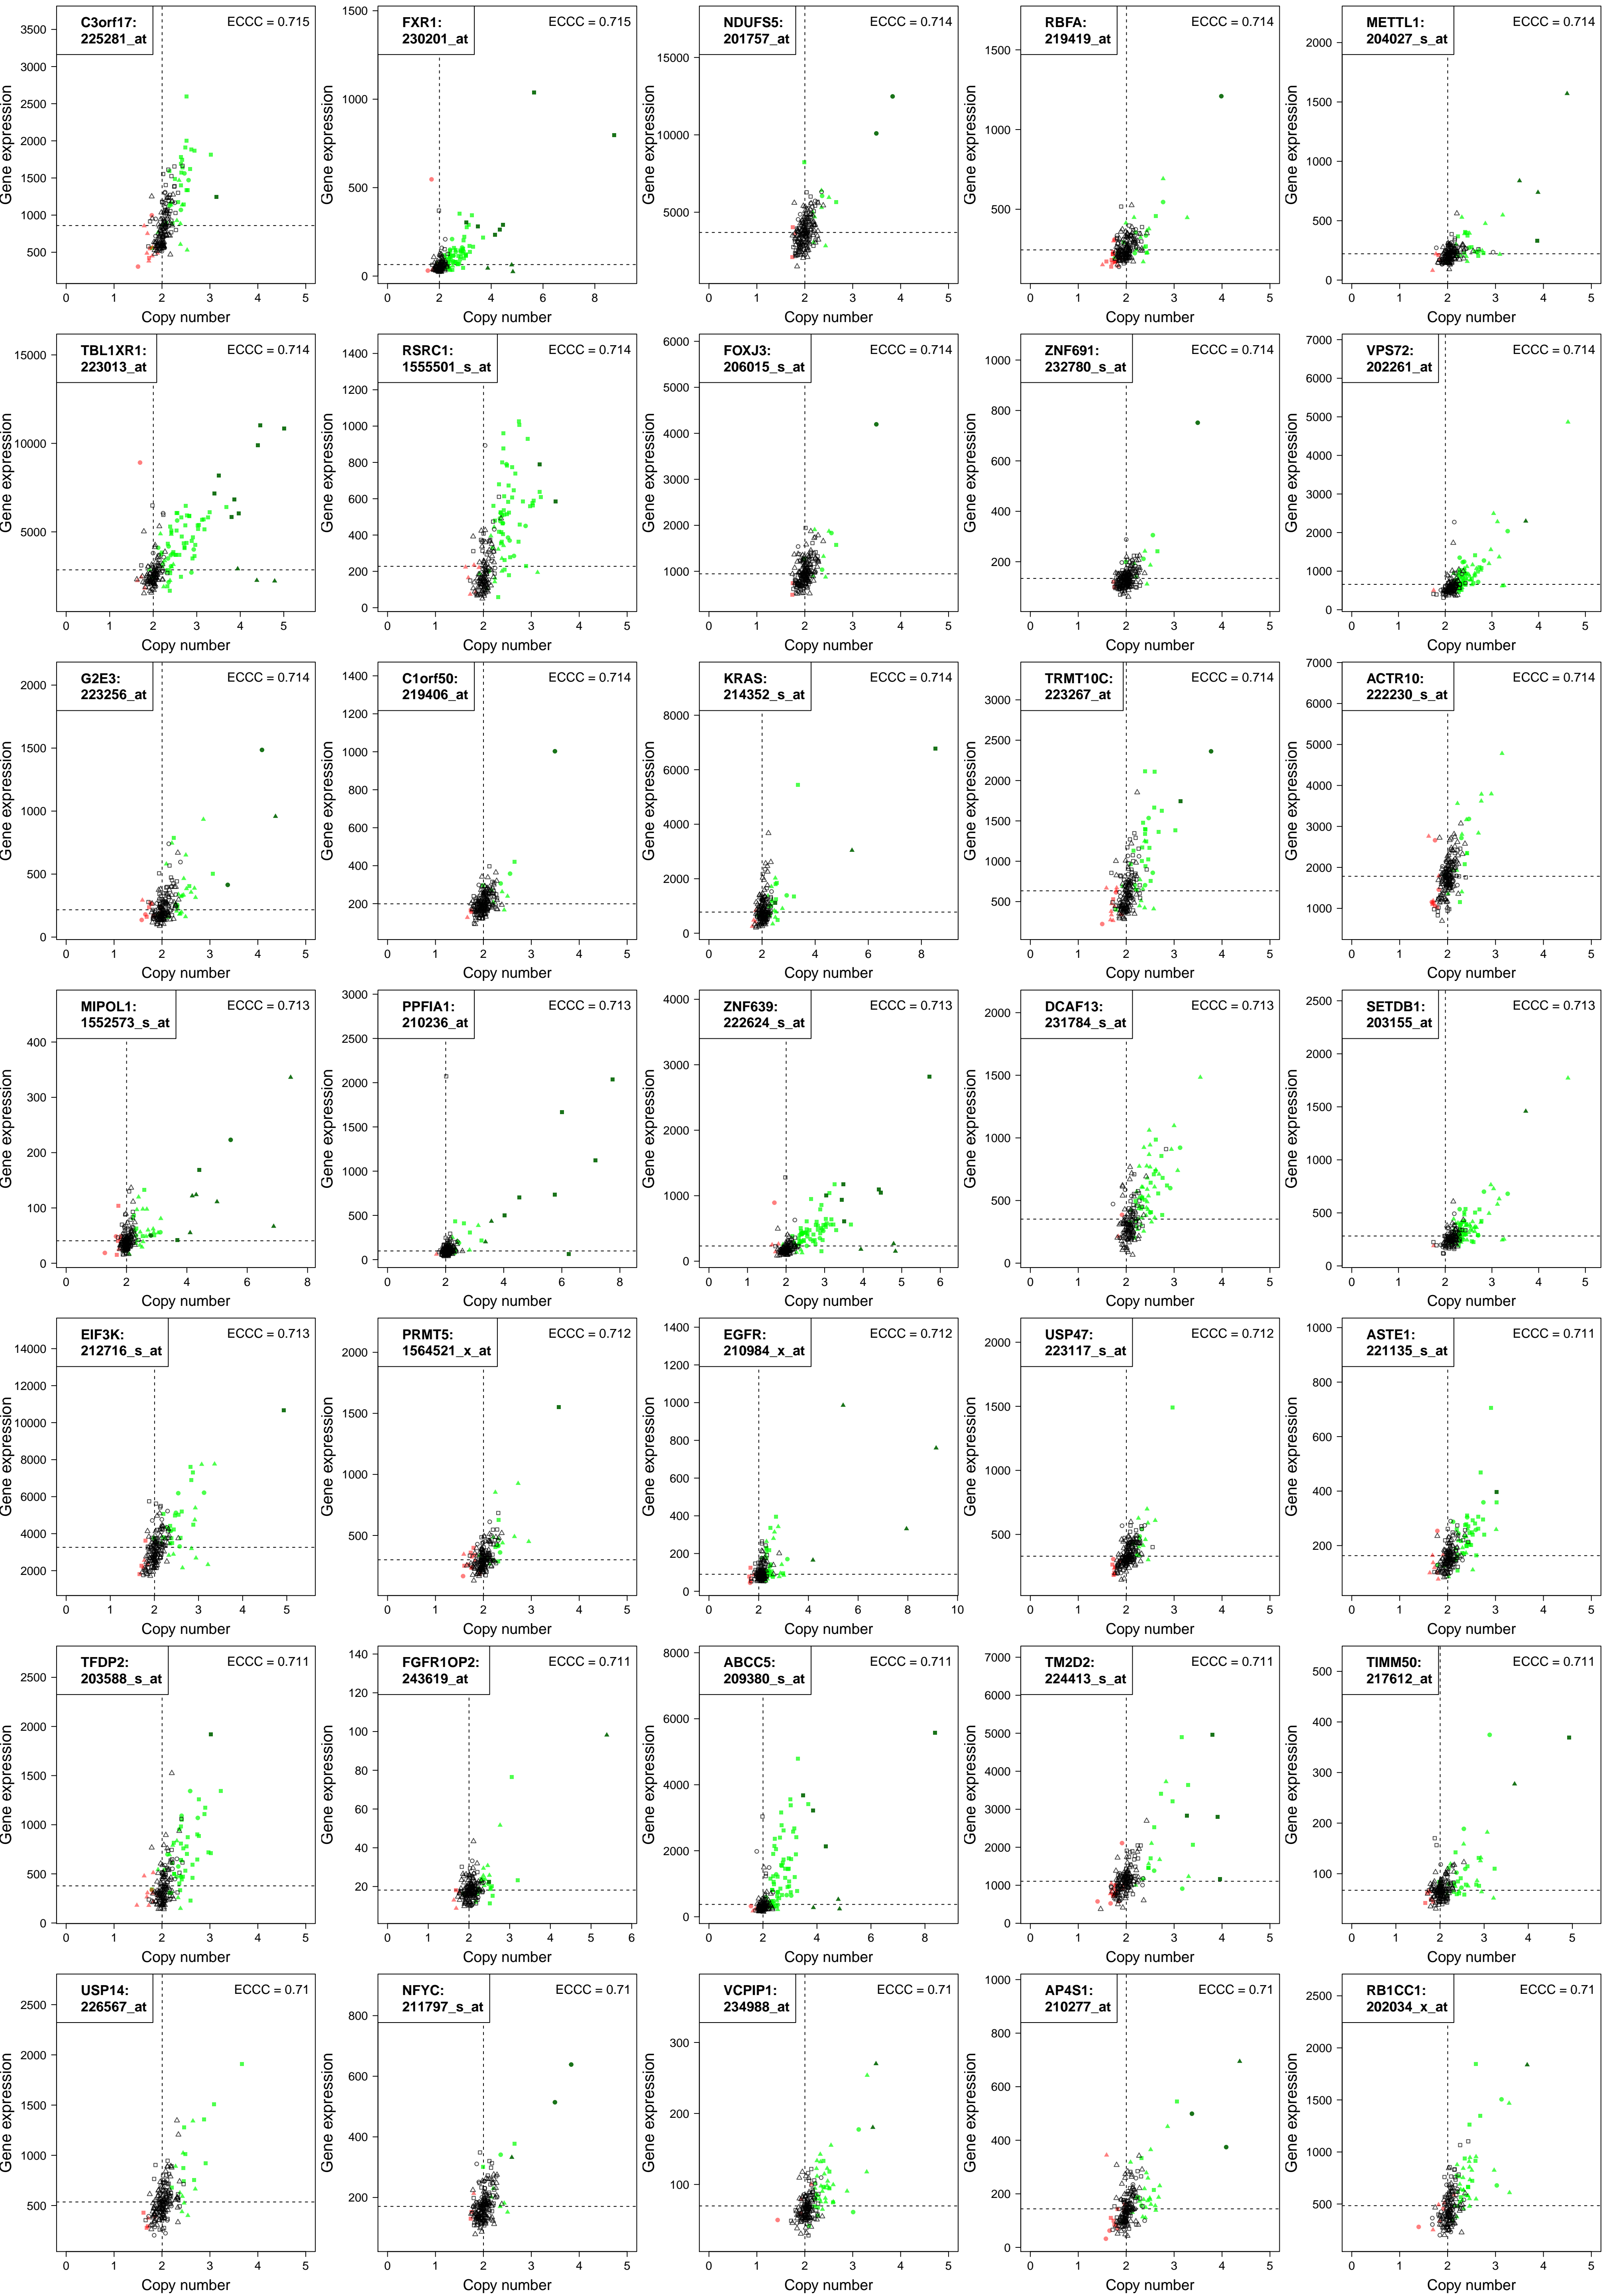

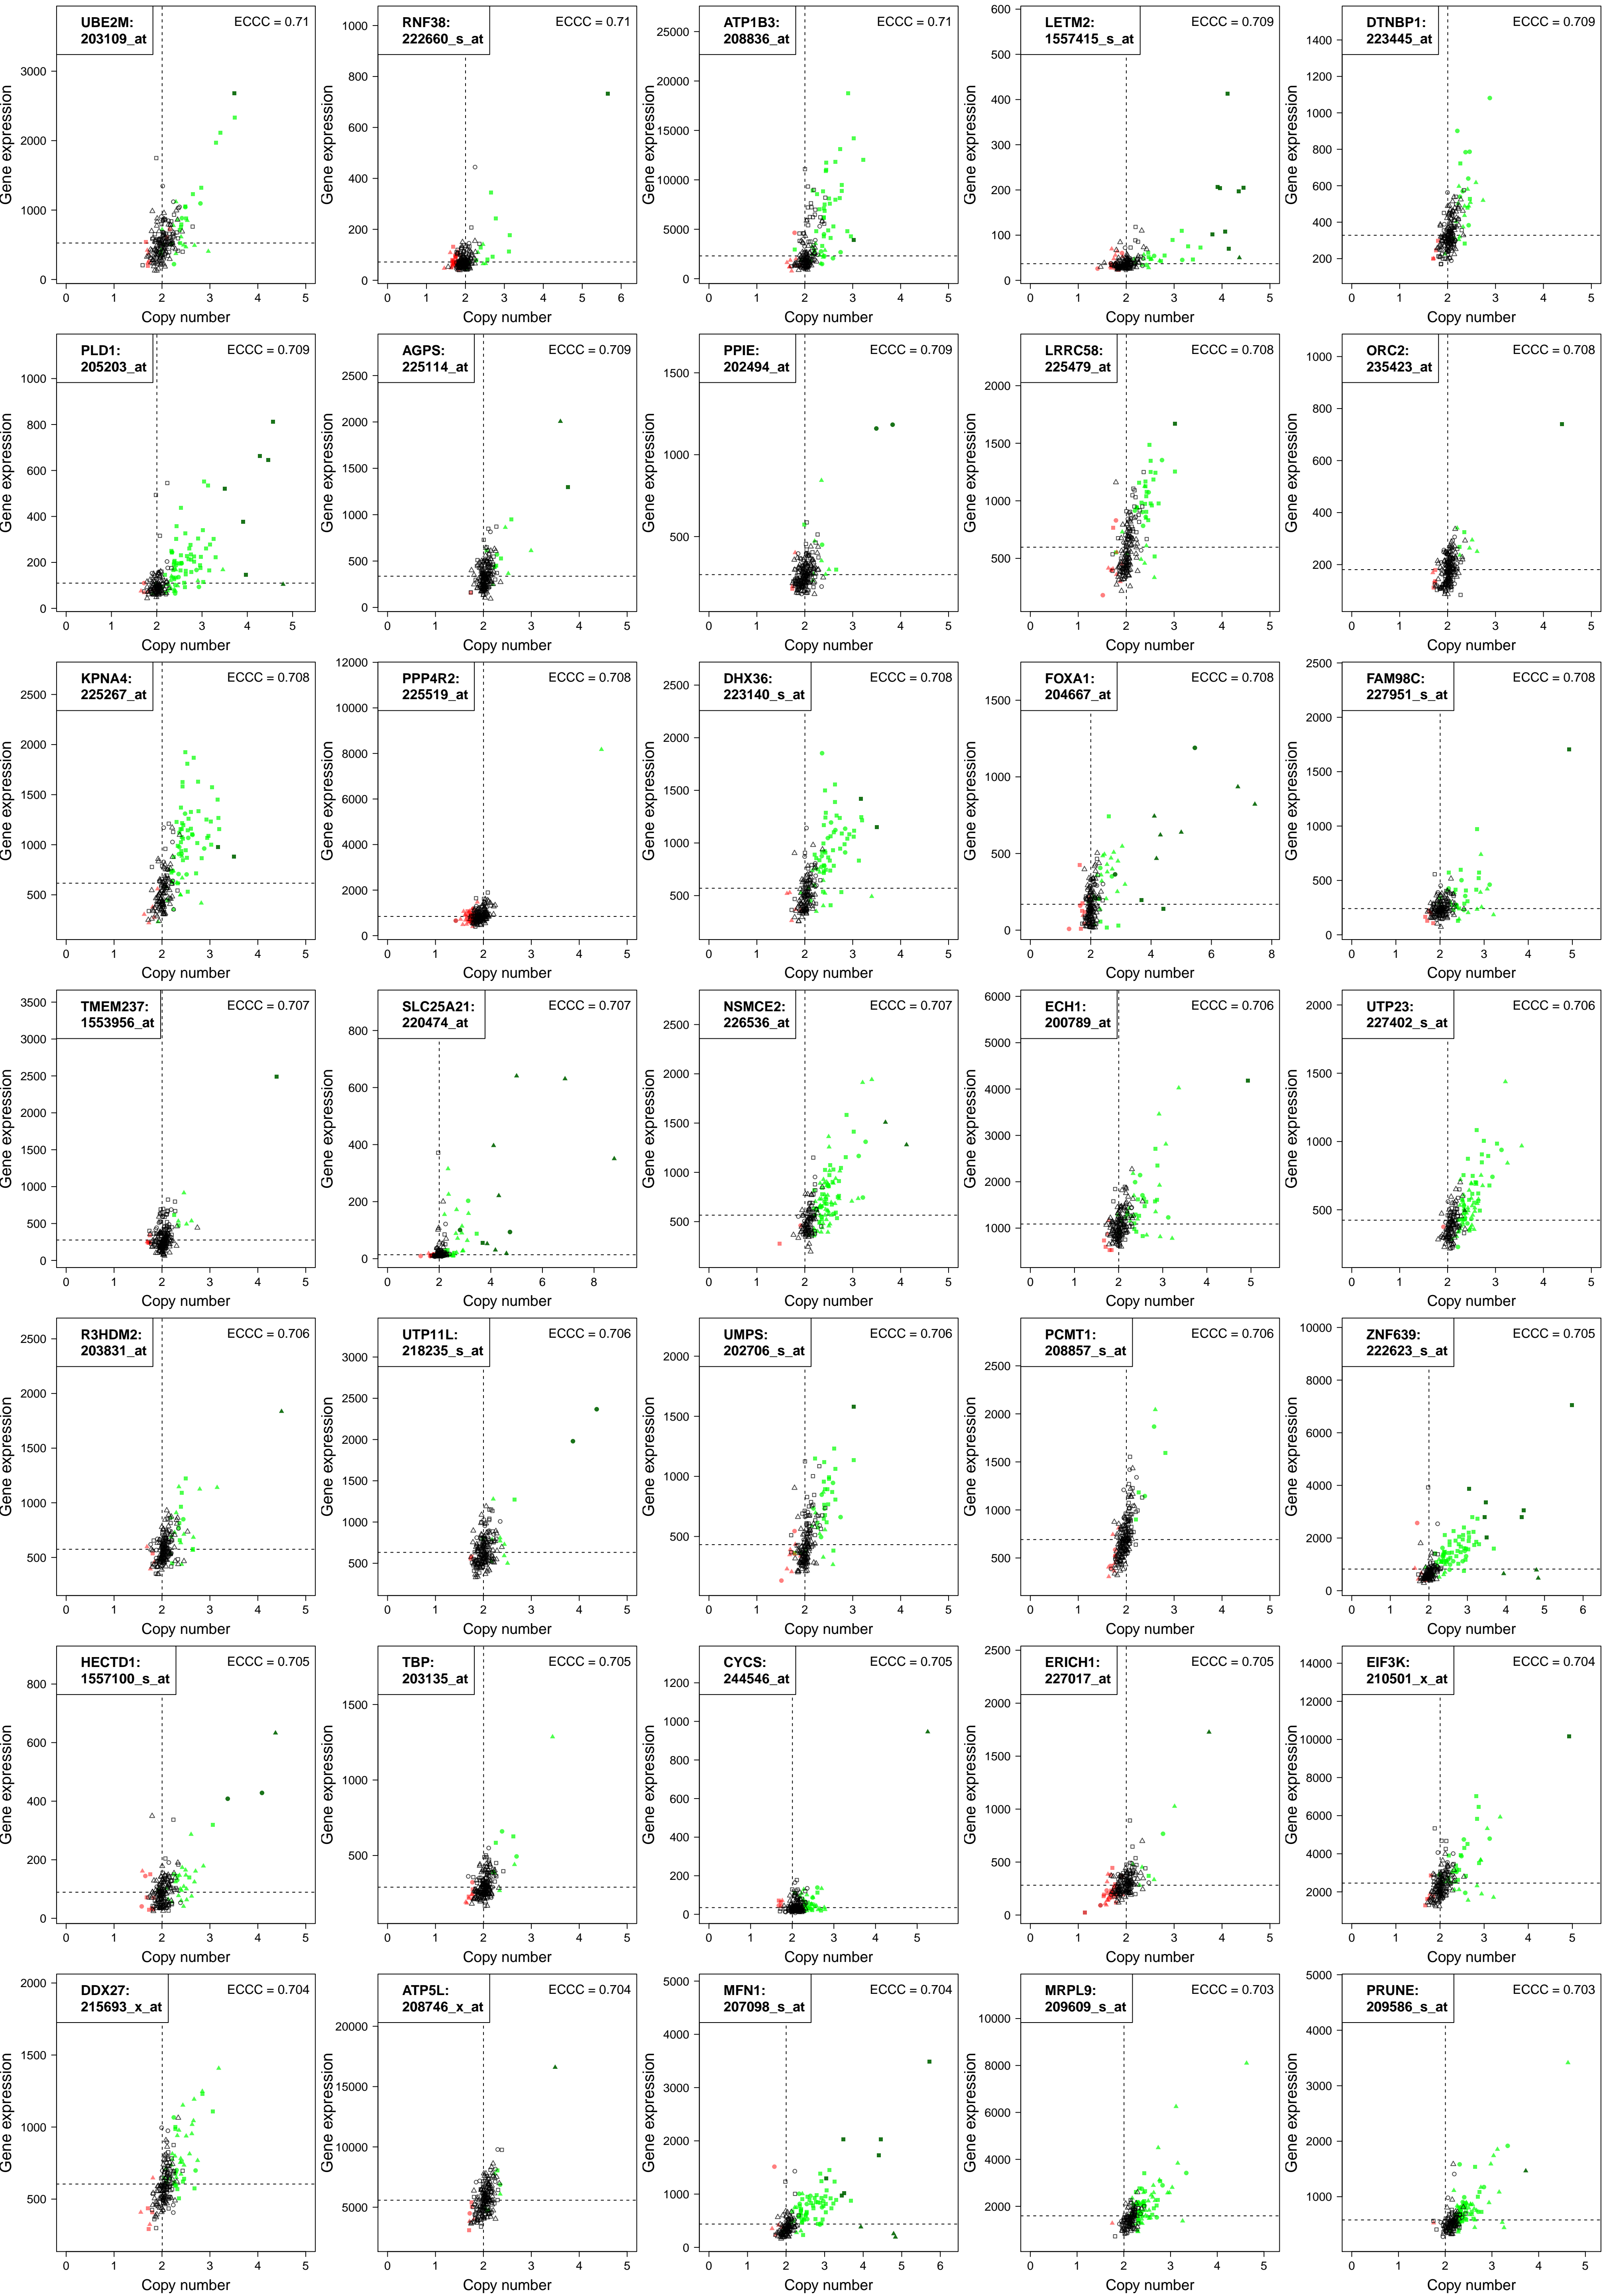

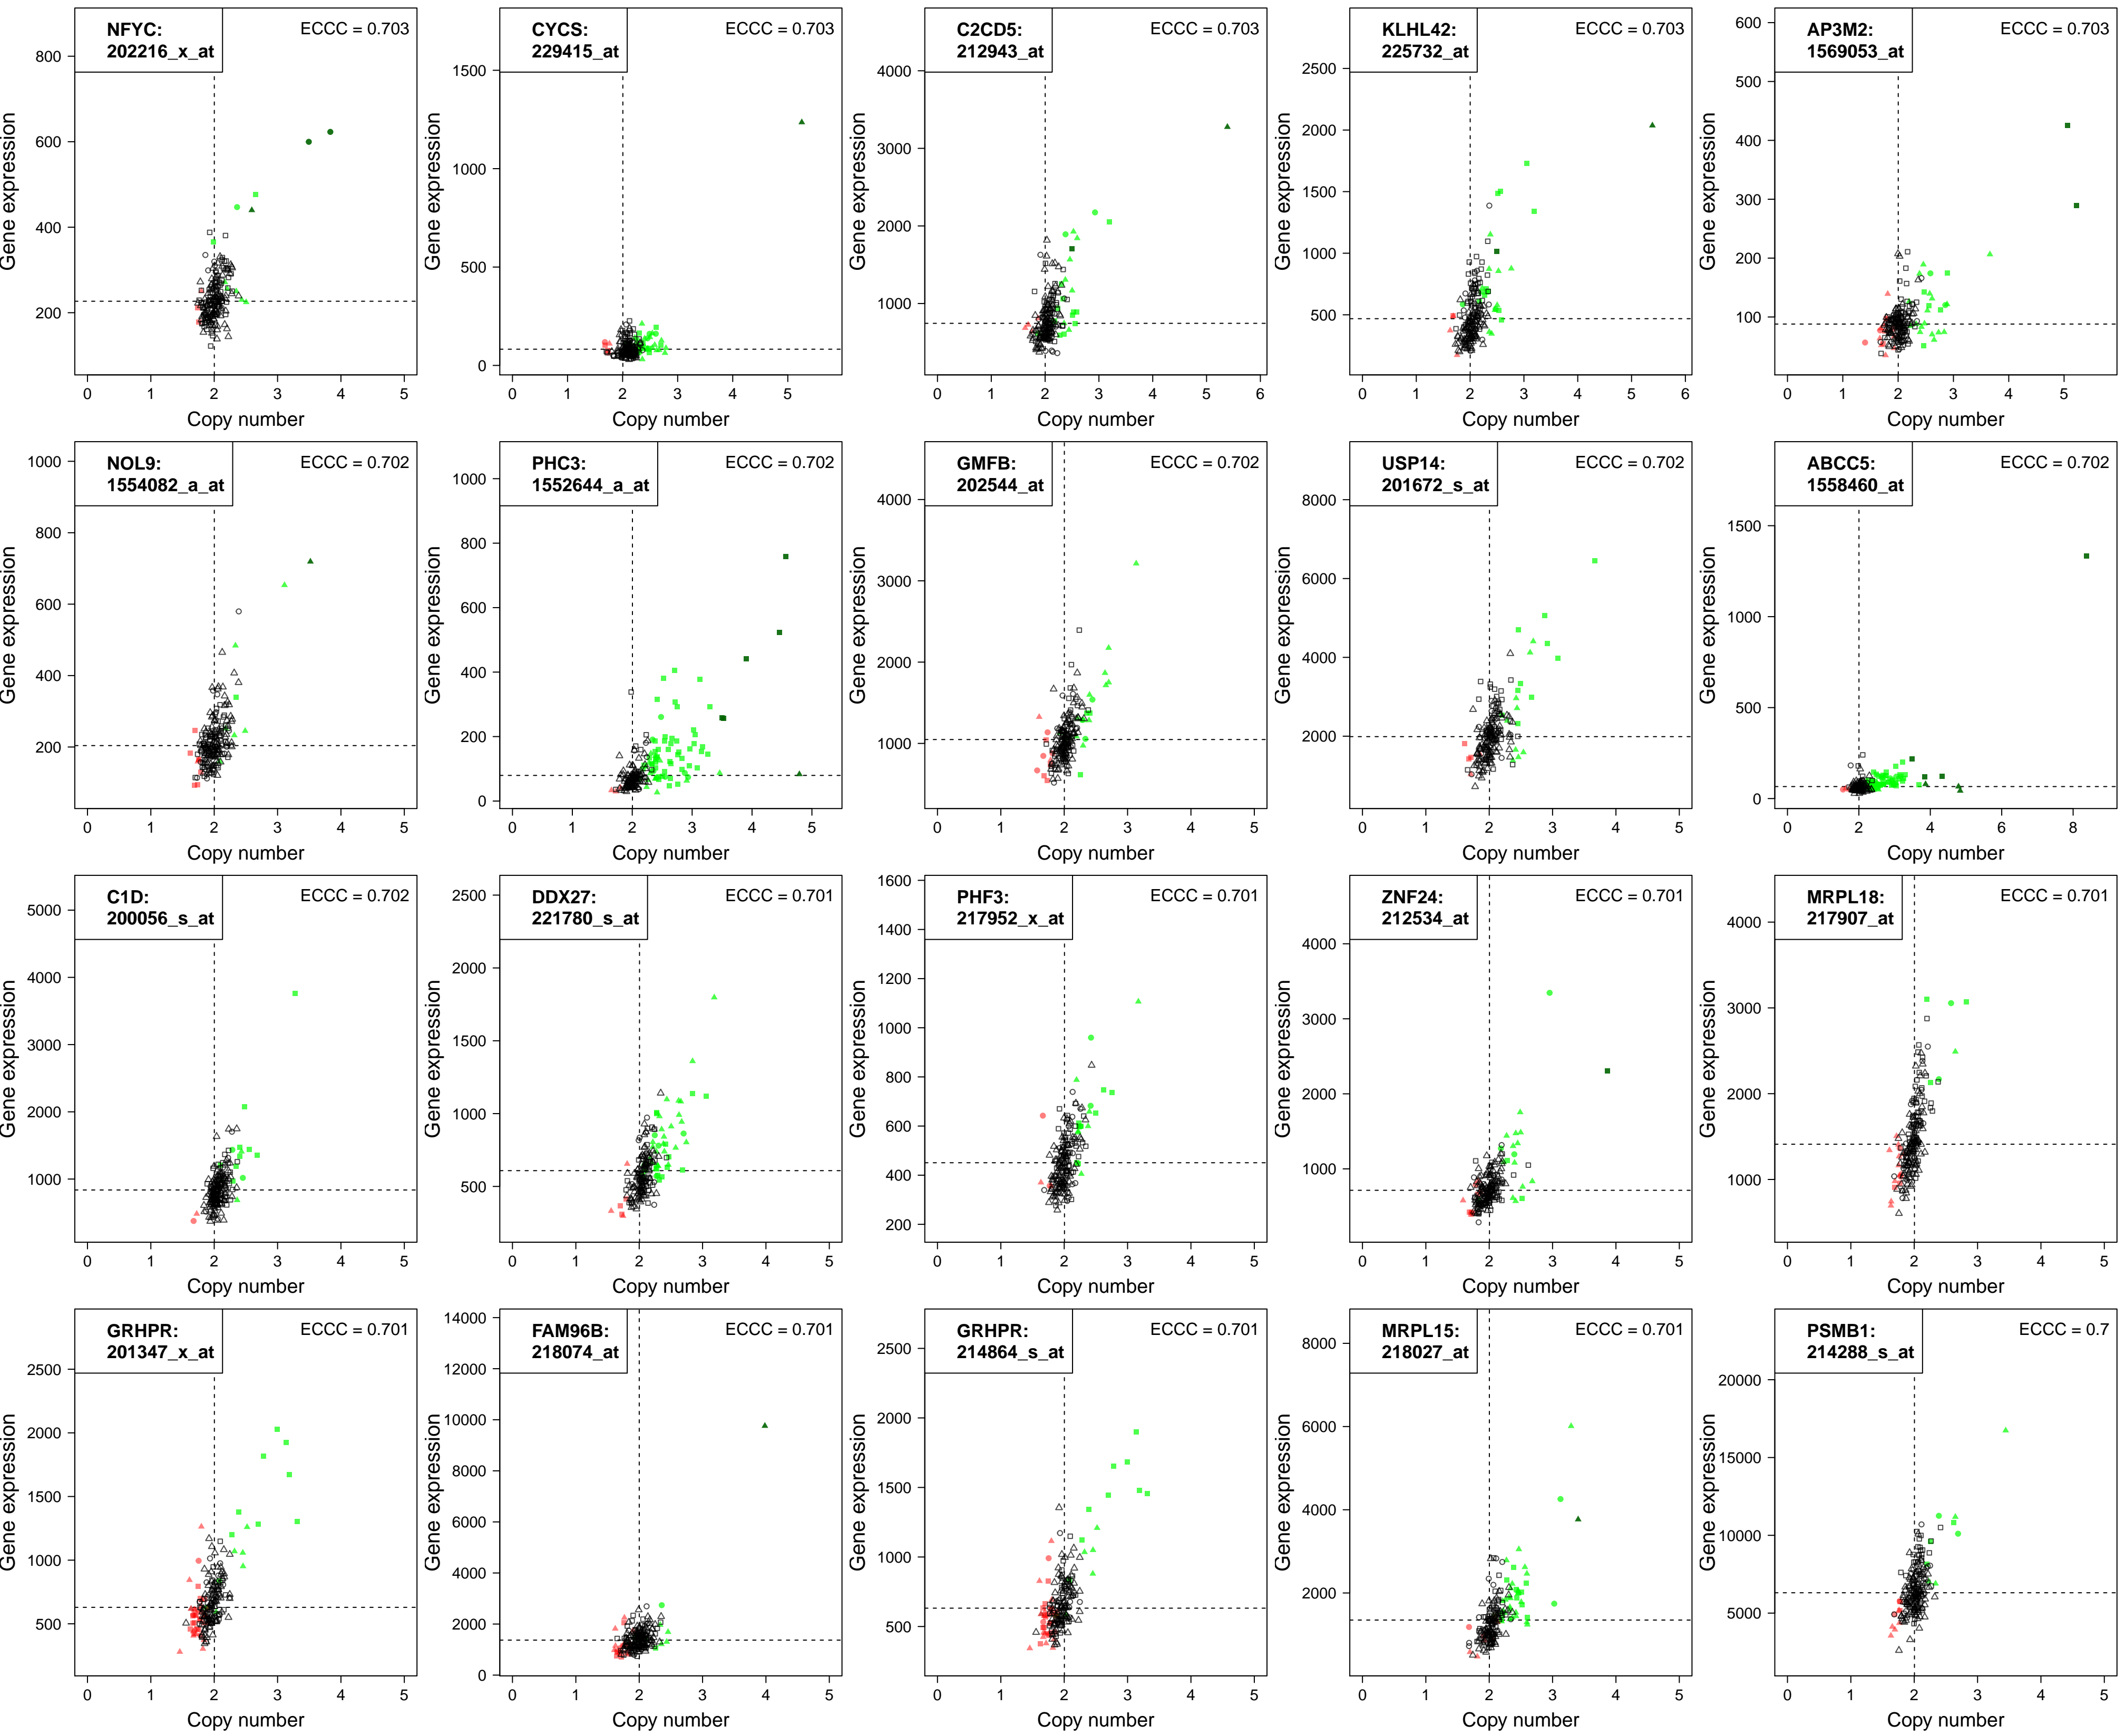

Supplement: pone.0187246.s001.pdf [file pone.0187246.s001.pdf]
