# Supplementary material for: Integrative analysis of genome-wide gene copy number changes and gene expression in non-small cell lung cancer
Source: PLoS One. 2017 Nov 7;12(11):e0187246. doi: 10.1371/journal.pone.0187246 (PMC5675410; doi:10.1371/journal.pone.0187246)
Supplement: S5 Table — (A) Gene Ontology (GO) enrichment analysis of the 440 significant highly correlating probe sets from the total NSCLC cohort. (B) Gene Ontology (GO) enrichment analysis of the 383 significant highly correlating probe set from the adenocarcinoma cases (n = 105). (C) Gene Ontology (GO) enrichment analysis of the 626 significant highly correlating probe set from the squamous cell cancer cases (n = 62). (XLSX) [file pone.0187246.s009.xlsx]

## Sheet: S5A All NSCLC
Suppl. Table 5A: Gene Ontology (GO) enrichment analysis of the 440 significant highly correlating probe sets from the total NSCLC cohort.
GO:ID	GO:Term	GO:N	sigProb	sigGen	Gene symbol	FDR	process/function
GO:2001145	negative regulation of phosphatidylinositol-3,4,5-trisphosphate 5-phosphatase activity	3	3	1	BAG4	0.00154	GS	Legend
GO:0090367	negative regulation of mRNA modification	3	3	1	BAG4	0.00154	R	GO:ID= Gene ontology group identification number
GO:1903363	negative regulation of cellular protein catabolic process	6	4	2	PPP2R3C,NOD2	0.000352	P	GO:Term= official GO term
GO:0002759	regulation of antimicrobial humoral response	6	4	2	ATP11B	0.000352	I	GO:N= Number of probe sets that are included in the GO-group
GO:0015917	aminophospholipid transport	6	6	1	RGP1,RIC1	2.64e-08	NS	sigProb=number of highly correlating probe sets present in the GO group
GO:0010265	SCF complex assembly	7	5	1	CAND1	2.376e-05	M	sigGen=number of highly correlating genes present in the GO group
GO:0045899	positive regulation of RNA polymerase II transcriptional preinitiation complex assembly	9	5	1	CAND1	5.544e-05	R	Gene symbol=highly correlating genes present in the GO group
GO:0071301	cellular response to vitamin B1	9	5	1	MDM2	5.544e-05	S	FDR=significance adjusted
GO:0071494	cellular response to UV-C	9	5	1	MDM2	5.544e-05	S	process/function= simplified process
GO:0035022	positive regulation of Rac protein signal transduction	11	4	2	KRAS,ALS2	0.0040425	G
GO:0045472	response to ether	13	5	1	MDM2	0.000352	S
GO:0051534	negative regulation of NFAT protein import into nucleus	13	4	1	DYRK2	0.00776471	NS
GO:0045116	protein neddylation	14	4	2	UBE2M,RNF7	0.00924	P
GO:0007089	traversing start control point of mitotic cell cycle	18	5	1	MDM2	0.00154	M
GO:0071236	cellular response to antibiotic	27	5	1	MDM2	0.00833684	S
GO:0071157	negative regulation of cell cycle arrest	37	5	1	MDM2	0.032713	M
GO:0032026	response to magnesium ion	38	5	1	MDM2	0.03575	S
GO:0045332	phospholipid translocation	52	6	1	ATP11B	0.0156	NS
GO:0031648	protein destabilization	59	7	2	SIAH1,MDM2	0.00396	P
GO:0071391	cellular response to estrogen stimulus	79	8	2	EGFR,MDM2	0.00292286	S
GO:0032436	positive regulation of proteasomal ubiquitin-dependent protein catabolic process	128	11	4	MDM2,VCP,SUMO1,UBE2V2	0.000352	P
GO:0001824	blastocyst development	154	10	5	CNOT1,SETDB1,MED21,CNOT2,G2E3	0.00806667	DE
GO:0032851	positive regulation of Rab GTPase activity	201	11	5	RAB3IP,RGP1,TBC1D15,RIC1,ALS2	0.0119429	G
GO:0016567	protein ubiquitination	1625	45	25	HECTD1,PARK7,PSMD8,PAF1,SIAH1,UBE2M,N4BP1,MDM2,CAND1,VCP,UBE2V2,SIAH2,MTA1,PSMB1,RNF7,RNF38,NOD2,UBE2R2,G2E3,FBXO25,KLHL42,COMMD1,FBXO33,DCAF13,VCPIP1	0.00162462	P

## Sheet: S5B Adeno-ca
Suppl. Table 5B: Gene Ontology (GO) enrichment analysis of the 383 significant highly correlating probe set from the adenocarcinoma cases (n=105).
GO:ID	GO:Term	GO:N	sigProb	sigGen	Gene symbol	FDR	process/function
GO:0010265	SCF complex assembly	7	7	1	CAND1	1.2804e-10	M	Legend
GO:0045899	positive regulation of RNA polymerase II transcriptional preinitiation complex assembly	9	7	1	CAND1	2.244e-09	R	GO:ID= Gene ontology group identification number
GO:0008298	intracellular mRNA localization	17	6	2	BICD1,STAU1	4.84e-05	R	GO:Term= official GO term
GO:0010569	regulation of double-strand break repair via homologous recombination	30	7	3	CHEK1,SPIDR,PPP4R2	5.28e-05	D	GO:N= Number of probe sets that are included in the GO-group
GO:0001824	blastocyst development	154	11	4	SETDB1,MED21,CNOT2,G2E3	0.00132	DE	sigProb=number of highly correlating probe sets present in the GO group
GO:0019694	alkanesulfonate metabolic process	9	4	1	MDM2	0.00198	NS	sigGen=number of highly correlating genes present in the GO group
GO:0071301	cellular response to vitamin B1	9	4	1	MDM2	0.00198	S	Gene symbol=highly correlating genes present in the GO group
GO:0071494	cellular response to UV-C	9	4	1	EGFR	0.00198	S	FDR=significance adjusted
GO:0048143	astrocyte activation	10	4	1	EGFR	0.00264	NS	process/function= simplified process
GO:0043006	activation of phospholipase A2 activity by calcium-mediated signaling	10	4	1	EGFR	0.00264	NS
GO:0045739	positive regulation of DNA repair	73	9	4	EGFR,UBE2V2,APEX1,SPIDR	0.00312	D
GO:0033594	response to hydroxyisoflavone	11	4	1	EGFR	0.00341	S
GO:2000645	negative regulation of receptor catabolic process	4	3	1	MTMR2	0.00406154	NS
GO:0045472	response to ether	13	4	1	MDM2	0.005808	S
GO:0051534	negative regulation of NFAT protein import into nucleus	13	4	1	DYRK2	0.005808	NS
GO:0033590	response to cobalamin	14	4	1	EGFR	0.00726	S
GO:0035407	histone H3-T11 phosphorylation	5	3	1	CHEK1	0.00726	NS
GO:0010767	regulation of transcription from RNA polymerase II promoter in response to UV-induced DNA damage	5	3	1	CHEK1	0.00726	D/R
GO:0045931	positive regulation of mitotic cell cycle	113	8	5	CDK4,TERF1,FOXA1,MDM2,USP2	0.0132	M
GO:0032930	positive regulation of superoxide anion generation	17	4	1	EGFR	0.01386	S
GO:0007089	traversing start control point of mitotic cell cycle	18	4	1	MDM2	0.0169714	M
GO:0071157	negative regulation of cell cycle arrest	37	5	2	CDK4,MDM2	0.0187	M
GO:2000615	regulation of histone H3-K9 acetylation	7	3	1	CHEK1	0.0187	D
GO:0070141	response to UV-A	19	4	1	EGFR	0.0187	S
GO:0002091	negative regulation of receptor internalization	8	3	1	MTMR2	0.0279231	NS
GO:0043518	negative regulation of DNA damage response, signal transduction by p53 class mediator	41	5	2	MDM2,DYRK1A	0.0279231	D
GO:0046602	regulation of mitotic centrosome separation	9	3	1	CHEK1	0.0396	M
GO:0071391	cellular response to estrogen stimulus	79	8	2	EGFR,MDM2	0.0409655	S
GO:0031659	positive regulation of cyclin-dependent protein serine/threonine kinase activity involved in G1/S transition of mitotic cell cycle	24	4	1	EGFR	0.0409655	M
GO:0050999	regulation of nitric-oxide synthase activity	106	7	4	EGFR,KRAS,PTS,LYPLA1	0.044	NS

## Sheet: S5C Squamous-ca
Suppl. Table 5C: Gene Ontology (GO) enrichment analysis of the 626 significant highly correlating probe set from the squamous cell cancer cases (n=62).
GO:ID	GO:Term	GO:N	sigProb	sigGen	Gene symbol	FDR	process/function
GO:0045006	DNA deamination	20	6	2	EXOSC5,EXOSC3	0.003652	D	Legend
GO:0071034	CUT catabolic process	12	5	1	EXOSC3	0.003652	R	GO:ID= Gene ontology group identification number
GO:1903363	negative regulation of cellular protein catabolic process	6	4	2	RGP1,RIC1	0.003652	P	GO:Term= official GO term
GO:0090503	RNA phosphodiester bond hydrolysis, exonucleolytic	71	9	3	CNOT2,EXOSC5,EXOSC3	0.00495	R	GO:N= Number of probe sets that are included in the GO-group
GO:2001145	negative regulation of phosphatidylinositol-3,4,5-trisphosphate 5-phosphatase activity	3	3	1	BAG4	0.00814	G	sigProb=number of highly correlating probe sets present in the GO group
GO:0090367	negative regulation of mRNA modification	3	3	1	BAG4	0.00814	R	sigGen=number of highly correlating genes present in the GO group
GO:0042771	intrinsic apoptotic signaling pathway in response to DNA damage by p53 class mediator	121	10	4	PPP2R5C,SNW1,DYRK2,TOPORS	0.0377143	M	Gene symbol=highly correlating genes present in the GO group
								FDR=significance adjusted
								process/function= simplified process
