# Supplementary material for: Integrative analysis of genome-wide gene copy number changes and gene expression in non-small cell lung cancer
Source: PLoS One. 2017 Nov 7;12(11):e0187246. doi: 10.1371/journal.pone.0187246 (PMC5675410; doi:10.1371/journal.pone.0187246)
Supplement: S7 Table — (A) Cox regression model for gene copy number and gene expression in the total NSCLC cohort (n = 190) for the 440 high correlation probe sets. (B) Cox regression model for gene copy number and gene expression in the total NSCLC cohort (n = 105) for the 383 high correlation probe sets. (C) Cox regression model for gene copy number and gene expression in the total NSCLC cohort (n = 62) for the 626 high correlation probe sets. (XLSX) [file pone.0187246.s011.xlsx]

## Sheet: S7A All NSCLC
Suppl. Table 7A: Cox regression model for gene copy number and gene expression in the total NSCLC cohort (n=190) for the 440 high correlation probe sets. In the multivariate in Cox regression model the gene copy number and gene expression are adjusted for the variables age (< 70 versus ≥ 70 years), patient performance status (0 versus I-III) and tumor stage (I versus II-IV). The p-values were adj…
		CN (univariate)					GE (univariate)					CN (multivariate)					GE (multivariate)
genesymbol	probe set	p-value	adj p-value	HR	CI lower	CI upper	p-value	adj p-value	HR	CI lower	CI upper	p-value	adj p-value	HR	CI lower	CI upper	p-value	adj p-value	HR	CI lower	CI upper
CDCA4	218399_s_at	0.349777	0.998794	0.836419	0.58	1.22	0.102467	0.756783	1.15916	0.97	1.38	0.665504	0.899957	0.926919	0.66	1.31	0.0768237	0.842809	1.19297	0.98	1.45
EAPP	202623_at	0.937269	0.998794	1.01333	0.73	1.41	0.309922	0.77952	0.862897	0.65	1.15	0.0972705	0.792574	1.30753	0.95	1.8	0.916508	0.98774	0.983705	0.72	1.34
KIAA0391	202713_s_at	0.886529	0.998794	0.977076	0.71	1.34	0.931426	0.980703	1.01079	0.79	1.29	0.249507	0.899957	1.20265	0.88	1.65	0.137105	0.842809	1.21272	0.94	1.56
BTBD6	225389_at	0.353567	0.998794	0.839113	0.58	1.22	0.69631	0.908911	0.945251	0.71	1.25	0.683081	0.899957	0.931908	0.66	1.31	0.915457	0.98774	0.98388	0.73	1.33
SRP54	203605_at	0.893316	0.998794	1.02253	0.74	1.42	0.776203	0.936549	0.964923	0.75	1.23	0.0831643	0.792574	1.31869	0.96	1.8	0.452854	0.89908	1.1081	0.85	1.45
PACS2	212778_at	0.375166	0.998794	0.852173	0.6	1.21	0.615344	0.893254	0.926729	0.69	1.25	0.721454	0.901818	0.942333	0.68	1.31	0.454156	0.89908	1.11926	0.83	1.5
PACS2	34406_at	0.375166	0.998794	0.852173	0.6	1.21	0.57307	0.886468	0.90614	0.64	1.28	0.721454	0.901818	0.942333	0.68	1.31	0.591113	0.924466	1.09785	0.78	1.54
MTA1	211783_s_at	0.375166	0.998794	0.852173	0.6	1.21	0.674694	0.907845	1.05189	0.83	1.33	0.721454	0.901818	0.942333	0.68	1.31	0.349561	0.89908	1.12735	0.88	1.45
NXT1	218708_at	0.780138	0.998794	1.03715	0.8	1.34	0.729628	0.919874	1.04692	0.81	1.36	0.707694	0.901818	1.05204	0.81	1.37	0.922706	0.98774	0.98641	0.75	1.3
BAZ1A	217986_s_at	0.963547	0.998794	1.00774	0.72	1.4	0.952937	0.980703	1.00753	0.79	1.29	0.0952288	0.792574	1.30906	0.95	1.8	0.26956	0.89908	1.16005	0.89	1.51
KRAS	204009_s_at	0.469645	0.998794	1.09451	0.86	1.4	0.634556	0.893254	1.06886	0.81	1.41	0.324347	0.899957	1.1436	0.88	1.49	0.989015	0.997798	0.997943	0.74	1.34
KAT6A	226547_at	0.763587	0.998794	1.05648	0.74	1.51	0.875087	0.97423	0.975831	0.72	1.32	0.470708	0.899957	1.14931	0.79	1.68	0.833928	0.984038	1.03456	0.75	1.42
GEMIN2	205063_at	0.257586	0.998794	1.21309	0.87	1.69	0.215538	0.756783	1.12611	0.93	1.36	0.0182023	0.715569	1.48299	1.07	2.06	0.0431021	0.812275	1.2279	1.01	1.5
GEMIN2	211115_x_at	0.257586	0.998794	1.21309	0.87	1.69	0.124369	0.756783	1.2011	0.95	1.52	0.0182023	0.715569	1.48299	1.07	2.06	0.0174722	0.704337	1.34775	1.05	1.72
BAZ1A	217985_s_at	0.963547	0.998794	1.00774	0.72	1.4	0.691835	0.908911	1.04555	0.84	1.3	0.0952288	0.792574	1.30906	0.95	1.8	0.183905	0.855223	1.17106	0.93	1.48
NAPB	225111_s_at	0.88403	0.998794	1.02016	0.78	1.33	0.59233	0.892553	1.0703	0.83	1.37	0.803696	0.927891	1.03567	0.79	1.37	0.583794	0.924466	1.07638	0.83	1.4
SNX6	217789_at	0.990702	0.998794	0.998006	0.71	1.4	0.896173	0.97603	1.02183	0.74	1.41	0.112018	0.834275	1.29705	0.94	1.79	0.137209	0.842809	1.30522	0.92	1.85
CST3	237623_at	0.710907	0.998794	1.04884	0.82	1.35	0.945267	0.980703	0.989956	0.74	1.32	0.551354	0.899957	1.07989	0.84	1.39	0.737577	0.94295	0.948722	0.7	1.29
CNOT2	217798_at	0.930636	0.998794	1.01871	0.67	1.55	0.962194	0.980703	1.00971	0.68	1.51	0.909763	0.948568	1.02436	0.68	1.55	0.983537	0.997798	1.00412	0.68	1.48
GZF1	225884_s_at	0.780138	0.998794	1.03715	0.8	1.34	0.853001	0.968307	0.973584	0.73	1.29	0.707694	0.901818	1.05204	0.81	1.37	0.749144	0.94295	0.951749	0.7	1.29
GEMIN2	211114_x_at	0.257586	0.998794	1.21309	0.87	1.69	0.080468	0.756783	1.21627	0.98	1.51	0.0182023	0.715569	1.48299	1.07	2.06	0.0136847	0.704337	1.33908	1.06	1.69
GEMIN2	210779_x_at	0.257586	0.998794	1.21309	0.87	1.69	0.15365	0.756783	1.17489	0.94	1.47	0.0182023	0.715569	1.48299	1.07	2.06	0.0255547	0.704337	1.29977	1.03	1.64
EGFR	201984_s_at	0.687207	0.998794	1.05018	0.83	1.33	0.510767	0.86217	1.05027	0.91	1.22	0.640766	0.899957	1.05771	0.84	1.34	0.47854	0.912261	1.05496	0.91	1.22
SLC35E3	218988_at	0.105007	0.998794	1.25158	0.95	1.64	0.204469	0.756783	1.18221	0.91	1.53	0.295886	0.899957	1.14872	0.89	1.49	0.521273	0.912261	1.08549	0.84	1.39
NAPB	1570441_at	0.88403	0.998794	1.02016	0.78	1.33	0.483755	0.850211	1.06661	0.89	1.28	0.803696	0.927891	1.03567	0.79	1.37	0.459588	0.89908	1.07311	0.89	1.29
GBAS	201816_s_at	0.813666	0.998794	0.950242	0.62	1.45	0.420803	0.812075	0.884278	0.66	1.19	0.822553	0.927891	0.954811	0.64	1.43	0.847694	0.98774	0.97163	0.72	1.3
SNX6	222410_s_at	0.990702	0.998794	0.998006	0.71	1.4	0.990469	0.992726	1.00186	0.74	1.36	0.112018	0.834275	1.29705	0.94	1.79	0.116358	0.842809	1.30651	0.94	1.82
FANCG	203564_at	0.401125	0.998794	1.16996	0.81	1.69	0.0565567	0.756783	1.22104	0.99	1.5	0.535776	0.899957	1.11306	0.79	1.56	0.109695	0.842809	1.17947	0.96	1.44
RALGAPA1	213049_at	0.92988	0.998794	1.01411	0.74	1.39	0.13572	0.756783	0.829658	0.65	1.06	0.203955	0.899957	1.2229	0.9	1.67	0.56093	0.924379	0.926156	0.72	1.2
ATP11B	1564064_a_at	0.983514	0.998794	1.00176	0.85	1.18	0.19851	0.756783	1.09883	0.95	1.27	0.559794	0.899957	0.944831	0.78	1.14	0.65699	0.935343	1.03499	0.89	1.2
LYRM5	225469_at	0.478997	0.998794	1.09279	0.85	1.4	0.621887	0.893254	0.927379	0.69	1.25	0.327838	0.899957	1.14276	0.87	1.49	0.622929	0.925976	0.924404	0.68	1.26
GZF1	234055_s_at	0.780138	0.998794	1.03715	0.8	1.34	0.719304	0.919874	0.934538	0.65	1.35	0.707694	0.901818	1.05204	0.81	1.37	0.993262	0.997798	1.00152	0.7	1.43
PNN	1567214_a_at	0.521624	0.998794	1.11985	0.79	1.58	0.197683	0.756783	1.18995	0.91	1.55	0.0512663	0.792574	1.40009	1	1.96	0.0875271	0.842809	1.27806	0.96	1.69
NUP107	218768_at	0.105007	0.998794	1.25158	0.95	1.64	0.0142086	0.748984	1.35705	1.06	1.73	0.295886	0.899957	1.14872	0.89	1.49	0.043574	0.812275	1.26867	1.01	1.6
RALGAPA1	214855_s_at	0.92988	0.998794	1.01411	0.74	1.39	0.140928	0.756783	0.85068	0.69	1.06	0.203955	0.899957	1.2229	0.9	1.67	0.492904	0.912261	0.923308	0.74	1.16
VCP	208648_at	0.401125	0.998794	1.16996	0.81	1.69	0.351228	0.78385	1.16212	0.85	1.59	0.535776	0.899957	1.11306	0.79	1.56	0.426196	0.89908	1.1306	0.84	1.53
BRF1	1552399_a_at	0.353567	0.998794	0.839113	0.58	1.22	0.584714	0.892553	0.879452	0.55	1.39	0.683081	0.899957	0.931908	0.66	1.31	0.899486	0.98774	0.969322	0.6	1.57
ATP11B	1554556_a_at	0.983514	0.998794	1.00176	0.85	1.18	0.150014	0.756783	1.11837	0.96	1.3	0.559794	0.899957	0.944831	0.78	1.14	0.4485	0.89908	1.06358	0.91	1.25
TRAPPC6B	225537_at	0.521624	0.998794	1.11985	0.79	1.58	0.563652	0.882215	1.09494	0.8	1.49	0.0512663	0.792574	1.40009	1	1.96	0.1098	0.842809	1.28732	0.94	1.75
DCUN1D1	218583_s_at	0.99181	0.998794	1.00088	0.85	1.18	0.610988	0.893254	1.04954	0.87	1.26	0.552534	0.899957	0.943822	0.78	1.14	0.797352	0.958833	0.974746	0.8	1.18
CNOT2	222182_s_at	0.930636	0.998794	1.01871	0.67	1.55	0.486734	0.850211	1.13232	0.8	1.61	0.909763	0.948568	1.02436	0.68	1.55	0.778335	0.953999	1.0523	0.74	1.5
C14orf80	228558_at	0.375166	0.998794	0.852173	0.6	1.21	0.959054	0.980703	1.01118	0.66	1.55	0.721454	0.901818	0.942333	0.68	1.31	0.365435	0.89908	1.22386	0.79	1.9
CCT2	201947_s_at	0.428073	0.998794	1.11141	0.86	1.44	0.0148688	0.748984	1.35316	1.06	1.73	0.608624	0.899957	1.06726	0.83	1.37	0.0356074	0.761854	1.29394	1.02	1.65
ATP11B	1554557_at	0.983514	0.998794	1.00176	0.85	1.18	0.226828	0.756783	1.07582	0.96	1.21	0.559794	0.899957	0.944831	0.78	1.14	0.588439	0.924466	1.03388	0.92	1.17
SCFD1	215548_s_at	0.996932	0.998794	1.00101	0.6	1.67	0.905039	0.978988	0.981426	0.72	1.34	0.223495	0.899957	1.38316	0.82	2.33	0.310201	0.89908	1.18722	0.85	1.65
KIAA0391	202714_s_at	0.886529	0.998794	0.977076	0.71	1.34	0.655339	0.893254	0.917543	0.63	1.34	0.249507	0.899957	1.20265	0.88	1.65	0.761948	0.947055	1.06039	0.73	1.55
BAG4	228189_at	0.708174	0.998794	0.943868	0.7	1.28	0.861217	0.969281	1.01858	0.83	1.25	0.755671	0.908457	0.953556	0.71	1.29	0.701556	0.94295	1.04216	0.84	1.29
RAB3IP	238526_at	0.459243	0.998794	1.10733	0.85	1.45	0.293976	0.77952	1.11583	0.91	1.37	0.651809	0.899957	1.06117	0.82	1.37	0.571573	0.924466	1.06105	0.86	1.3
ATP11B	1564063_a_at	0.983514	0.998794	1.00176	0.85	1.18	0.099045	0.756783	1.15759	0.97	1.38	0.559794	0.899957	0.944831	0.78	1.14	0.489635	0.912261	1.06776	0.89	1.29
ATP11B	212536_at	0.983514	0.998794	1.00176	0.85	1.18	0.311306	0.77952	1.09602	0.92	1.31	0.559794	0.899957	0.944831	0.78	1.14	0.990663	0.997798	0.998873	0.83	1.21
PIGO	209998_at	0.401125	0.998794	1.16996	0.81	1.69	0.415046	0.808483	1.11689	0.86	1.46	0.535776	0.899957	1.11306	0.79	1.56	0.435568	0.89908	1.10751	0.86	1.43
LSM1	203534_at	0.708174	0.998794	0.943868	0.7	1.28	0.921436	0.979504	0.987744	0.77	1.26	0.755671	0.908457	0.953556	0.71	1.29	0.859014	0.98774	1.02302	0.8	1.32
KIAA1432	226221_at	0.205196	0.998794	1.34071	0.85	2.11	0.700275	0.908911	1.08292	0.72	1.62	0.286835	0.899957	1.23345	0.84	1.81	0.602535	0.924466	1.10642	0.76	1.62
LANCL2	218219_s_at	0.983572	0.998794	1.00321	0.74	1.36	0.456194	0.850211	1.11027	0.84	1.46	0.929005	0.95061	1.01358	0.75	1.36	0.307255	0.89908	1.15449	0.88	1.52
FAM177A1	227029_at	0.893316	0.998794	1.02253	0.74	1.42	0.651974	0.893254	0.956673	0.79	1.16	0.0831643	0.792574	1.31869	0.96	1.8	0.537875	0.913764	1.06643	0.87	1.31
MDM2	229711_s_at	0.105007	0.998794	1.25158	0.95	1.64	0.108601	0.756783	1.23133	0.95	1.59	0.295886	0.899957	1.14872	0.89	1.49	0.579218	0.924466	1.07362	0.84	1.38
RAP1B	200833_s_at	0.105007	0.998794	1.25158	0.95	1.64	0.334367	0.78385	1.19449	0.83	1.71	0.295886	0.899957	1.14872	0.89	1.49	0.982251	0.997798	1.00406	0.7	1.43
FASTKD2	216996_s_at	0.99377	0.998794	1.00228	0.57	1.77	0.0949794	0.756783	1.31057	0.95	1.8	0.997565	0.997565	0.999096	0.56	1.79	0.0986304	0.842809	1.33095	0.95	1.87
MIPOL1	1552572_a_at	0.881419	0.998794	1.0178	0.81	1.28	0.199803	0.756783	1.1687	0.92	1.48	0.284002	0.899957	1.13415	0.9	1.43	0.0235514	0.704337	1.3448	1.04	1.74
TESK1	204106_at	0.507795	0.998794	1.16001	0.75	1.8	0.41135	0.808009	1.1949	0.78	1.83	0.516686	0.899957	1.1398	0.77	1.69	0.289979	0.89908	1.24226	0.83	1.86
CDC37L1	219343_at	0.182412	0.998794	1.35248	0.87	2.11	0.695841	0.908911	1.05653	0.8	1.39	0.272989	0.899957	1.23765	0.85	1.81	0.436822	0.89908	1.11386	0.85	1.46
PNN	212036_s_at	0.521624	0.998794	1.11985	0.79	1.58	0.222108	0.756783	1.18434	0.9	1.55	0.0512663	0.792574	1.40009	1	1.96	0.130117	0.842809	1.25015	0.94	1.67
STOML2	215416_s_at	0.401125	0.998794	1.16996	0.81	1.69	0.00823437	0.748984	1.35183	1.08	1.69	0.535776	0.899957	1.11306	0.79	1.56	0.0130576	0.704337	1.31656	1.06	1.64
MCCC1	218440_at	0.992125	0.998794	0.999156	0.84	1.18	0.392104	0.799891	0.923906	0.77	1.11	0.538515	0.899957	0.941657	0.78	1.14	0.35172	0.89908	0.915339	0.76	1.1
C16orf80	217957_at	0.307884	0.998794	0.681656	0.33	1.42	0.563757	0.882215	1.09594	0.8	1.5	0.493033	0.899957	0.76728	0.36	1.64	0.883491	0.98774	1.02697	0.72	1.47
VCP	208649_s_at	0.401125	0.998794	1.16996	0.81	1.69	0.363625	0.784058	1.18096	0.82	1.69	0.535776	0.899957	1.11306	0.79	1.56	0.309083	0.89908	1.19531	0.85	1.69
POLR2B	201803_at	0.0344644	0.998794	0.365083	0.14	0.93	0.363716	0.784058	0.821566	0.54	1.26	0.0426156	0.792574	0.363604	0.14	0.97	0.378047	0.89908	0.822697	0.53	1.27
SIAH1	202981_x_at	0.396967	0.998794	0.74991	0.39	1.46	0.393275	0.799891	1.15775	0.83	1.62	0.615717	0.899957	0.838192	0.42	1.67	0.35627	0.89908	1.18807	0.82	1.71
CCT2	201946_s_at	0.428073	0.998794	1.11141	0.86	1.44	0.0153201	0.748984	1.25455	1.04	1.51	0.608624	0.899957	1.06726	0.83	1.37	0.0789558	0.842809	1.17829	0.98	1.41
DCUN1D1	238879_at	0.99181	0.998794	1.00088	0.85	1.18	0.514019	0.86217	1.0559	0.9	1.24	0.552534	0.899957	0.943822	0.78	1.14	0.857975	0.98774	1.0157	0.86	1.2
CAND1	207483_s_at	0.310656	0.998794	1.15431	0.87	1.52	0.0454447	0.756783	1.31139	1.01	1.71	0.469299	0.899957	1.10594	0.84	1.45	0.173253	0.847598	1.20397	0.92	1.57
MDM1	220397_at	0.154105	0.998794	1.21082	0.93	1.58	0.300235	0.77952	1.10401	0.92	1.33	0.345251	0.899957	1.13138	0.88	1.46	0.558531	0.924379	1.05676	0.88	1.27
MDM2	225160_x_at	0.105007	0.998794	1.25158	0.95	1.64	0.0420928	0.756783	1.30143	1.01	1.68	0.295886	0.899957	1.14872	0.89	1.49	0.195969	0.879861	1.17507	0.92	1.5
PPP2R3C	218852_at	0.893316	0.998794	1.02253	0.74	1.42	0.240439	0.756783	1.17076	0.9	1.52	0.0831643	0.792574	1.31869	0.96	1.8	0.00401975	0.528257	1.50881	1.14	2
PPP2R3C	1569894_at	0.893316	0.998794	1.02253	0.74	1.42	0.648499	0.893254	0.937399	0.71	1.24	0.0831643	0.792574	1.31869	0.96	1.8	0.681061	0.94295	1.06363	0.79	1.43
KIAA1432	226222_at	0.205196	0.998794	1.34071	0.85	2.11	0.631025	0.893254	1.09347	0.76	1.57	0.286835	0.899957	1.23345	0.84	1.81	0.436255	0.89908	1.14816	0.81	1.63
WHSC1L1	224076_s_at	0.861894	0.998794	0.974194	0.73	1.31	0.515206	0.86217	0.927603	0.74	1.16	0.847708	0.927891	0.971515	0.72	1.3	0.405895	0.89908	0.905656	0.72	1.14
YEATS4	218911_at	0.198503	0.998794	1.18671	0.91	1.54	0.313815	0.77952	1.11038	0.91	1.36	0.407452	0.899957	1.10847	0.87	1.41	0.532741	0.912261	1.0643	0.88	1.29
MEAF6	218165_at	0.0940434	0.998794	0.453229	0.18	1.14	0.1036	0.756783	0.760283	0.55	1.06	0.132726	0.834275	0.469149	0.17	1.26	0.226342	0.89908	0.804543	0.57	1.14
WHSC1L1	238496_at	0.861894	0.998794	0.974194	0.73	1.31	0.99735	0.99735	0.999728	0.85	1.17	0.847708	0.927891	0.971515	0.72	1.3	0.954813	0.992791	0.99533	0.85	1.17
MIPOL1	244246_at	0.881419	0.998794	1.0178	0.81	1.28	0.167915	0.756783	1.12079	0.95	1.32	0.284002	0.899957	1.13415	0.9	1.43	0.0288138	0.704337	1.21708	1.02	1.45
SEC61G	203484_at	0.956522	0.998794	0.989235	0.67	1.46	0.851276	0.968307	0.962294	0.64	1.44	0.983104	0.992123	0.995983	0.69	1.45	0.845165	0.98774	1.04201	0.69	1.57
PLGRKT	218992_at	0.367895	0.998794	1.24889	0.77	2.03	0.959853	0.980703	1.00581	0.8	1.26	0.394913	0.899957	1.19045	0.8	1.78	0.525834	0.912261	1.07741	0.86	1.36
EGFR	224999_at	0.687207	0.998794	1.05018	0.83	1.33	0.782387	0.936549	1.01863	0.89	1.16	0.640766	0.899957	1.05771	0.84	1.34	0.882708	0.98774	1.00999	0.88	1.15
FNTA	200090_at	0.161457	0.998794	1.30253	0.9	1.89	0.0390361	0.756783	1.42802	1.02	2	0.0544019	0.792574	1.47757	0.99	2.2	0.0780947	0.842809	1.38798	0.96	2
VOPP1	208091_s_at	0.869244	0.998794	0.97042	0.68	1.39	0.704677	0.911935	1.05959	0.79	1.43	0.946823	0.96213	0.988396	0.7	1.39	0.279352	0.89908	1.18044	0.87	1.59
FBXO33	227521_at	0.303929	0.998794	1.19498	0.85	1.68	0.372461	0.787651	1.1394	0.86	1.52	0.0196622	0.715569	1.4791	1.06	2.06	0.0974487	0.842809	1.29009	0.95	1.74
B3GNT5	225612_s_at	0.928285	0.998794	0.992186	0.84	1.18	0.26626	0.756783	1.08358	0.94	1.25	0.481949	0.899957	0.932164	0.77	1.13	0.503133	0.912261	1.05029	0.91	1.21
FRS2	226045_at	0.391877	0.998794	1.11446	0.87	1.43	0.263583	0.756783	1.1456	0.9	1.45	0.600202	0.899957	1.06539	0.84	1.35	0.836276	0.984038	1.02565	0.81	1.3
DCUN1D1	240781_x_at	0.99181	0.998794	1.00088	0.85	1.18	0.56542	0.882215	1.05121	0.89	1.25	0.552534	0.899957	0.943822	0.78	1.14	0.963459	0.992791	1.00419	0.84	1.2
FNTA	209471_s_at	0.161457	0.998794	1.30253	0.9	1.89	0.0781323	0.756783	1.28444	0.97	1.7	0.0544019	0.792574	1.47757	0.99	2.2	0.157251	0.845909	1.24204	0.92	1.68
DYRK2	202970_at	0.208528	0.998794	1.17097	0.92	1.5	0.206334	0.756783	1.22153	0.9	1.67	0.42394	0.899957	1.10381	0.87	1.41	0.529625	0.912261	1.10175	0.81	1.49
POLR2B	1555837_s_at	0.0344644	0.998794	0.365083	0.14	0.93	0.263526	0.756783	0.808936	0.56	1.17	0.0426156	0.792574	0.363604	0.14	0.97	0.252497	0.89908	0.799856	0.55	1.17
C8orf76	225702_at	0.140828	0.998794	1.23496	0.93	1.64	0.194799	0.756783	1.16318	0.93	1.46	0.246121	0.899957	1.18153	0.89	1.57	0.413092	0.89908	1.10358	0.87	1.4
DCUN1D1	237408_at	0.99181	0.998794	1.00088	0.85	1.18	0.724707	0.919874	1.05167	0.79	1.39	0.552534	0.899957	0.943822	0.78	1.14	0.748148	0.94295	0.949605	0.69	1.3
ZHX1-C8ORF76	1554063_at	0.140828	0.998794	1.23496	0.93	1.64	0.295487	0.77952	1.13938	0.89	1.45	0.246121	0.899957	1.18153	0.89	1.57	0.388078	0.89908	1.11551	0.87	1.43
MRPS17	218982_s_at	0.813666	0.998794	0.950242	0.62	1.45	0.214401	0.756783	1.17041	0.91	1.5	0.822553	0.927891	0.954811	0.64	1.43	0.0819341	0.842809	1.24275	0.97	1.59
GOLGA7	217819_at	0.849661	0.998794	1.05561	0.6	1.85	0.918285	0.979504	0.981103	0.68	1.41	0.697364	0.901818	1.12229	0.63	2.01	0.690009	0.94295	0.925847	0.63	1.35
RAB3IP	223471_at	0.459243	0.998794	1.10733	0.85	1.45	0.245828	0.756783	1.1241	0.92	1.37	0.651809	0.899957	1.06117	0.82	1.37	0.218965	0.89908	1.13037	0.93	1.37
MRPS35	217942_at	0.759043	0.998794	1.06912	0.7	1.64	0.211738	0.756783	1.18186	0.91	1.54	0.824848	0.927891	1.05145	0.67	1.64	0.178515	0.847598	1.20863	0.92	1.59
USB1	1554016_a_at	0.318215	0.998794	0.690493	0.33	1.43	0.893901	0.97603	0.975575	0.68	1.4	0.514461	0.899957	0.780544	0.37	1.64	0.583045	0.924466	1.11167	0.76	1.62
RAB21	226268_at	0.00891231	0.653569	2.13439	1.21	3.77	0.0498146	0.756783	1.31058	1	1.72	0.0662101	0.792574	1.68016	0.97	2.92	0.232672	0.89908	1.17103	0.9	1.52
KRAS	1559203_s_at	0.469645	0.998794	1.09451	0.86	1.4	0.415266	0.808483	1.12779	0.84	1.51	0.324347	0.899957	1.1436	0.88	1.49	0.25883	0.89908	1.18722	0.88	1.6
MDM2	217542_at	0.105007	0.998794	1.25158	0.95	1.64	0.129897	0.756783	1.22104	0.94	1.58	0.295886	0.899957	1.14872	0.89	1.49	0.749311	0.94295	1.04362	0.8	1.36
ASH2L	209517_s_at	0.370862	0.998794	0.857537	0.61	1.2	0.953212	0.980703	1.00769	0.78	1.3	0.403764	0.899957	0.867416	0.62	1.21	0.821764	0.977233	1.03018	0.8	1.33
CNOT1	200860_s_at	0.258239	0.998794	0.631698	0.28	1.4	0.320666	0.77952	1.2085	0.83	1.76	0.421545	0.899957	0.71714	0.32	1.61	0.0892255	0.842809	1.4058	0.95	2.08
ZNF697	227080_at	0.0473919	0.998794	1.63449	1.01	2.66	0.152014	0.756783	1.21183	0.93	1.58	0.0896091	0.792574	1.58682	0.93	2.7	0.112439	0.842809	1.24344	0.95	1.63
MRPS22	226257_x_at	0.890872	0.998794	1.04137	0.58	1.86	0.157282	0.756783	1.2285	0.92	1.63	0.689286	0.899957	0.89221	0.51	1.56	0.518341	0.912261	1.09983	0.82	1.47
SNIP1	235837_at	0.0940434	0.998794	0.453229	0.18	1.14	0.0534023	0.756783	0.668301	0.44	1.01	0.132726	0.834275	0.469149	0.17	1.26	0.0966086	0.842809	0.69956	0.46	1.07
FGFR1OP2	223262_s_at	0.733062	0.998794	1.07675	0.7	1.65	0.909209	0.979504	0.976844	0.65	1.46	0.849864	0.927891	1.04449	0.67	1.64	0.946519	0.992791	1.01358	0.68	1.5
UBAP2	221839_s_at	0.585196	0.998794	1.14747	0.7	1.88	0.562234	0.882215	1.07736	0.84	1.39	0.670725	0.899957	1.10247	0.7	1.73	0.610791	0.924466	1.06592	0.83	1.36
NDUFS1	203039_s_at	0.548551	0.998794	1.1684	0.7	1.94	0.150224	0.756783	1.24372	0.92	1.67	0.41508	0.899957	1.23651	0.74	2.06	0.0881493	0.842809	1.30793	0.96	1.78
MRPS22	219220_x_at	0.890872	0.998794	1.04137	0.58	1.86	0.162854	0.756783	1.20955	0.93	1.58	0.689286	0.899957	0.89221	0.51	1.56	0.560483	0.924379	1.08373	0.83	1.42
RNF38	218528_s_at	0.375071	0.998794	1.2261	0.78	1.92	0.12024	0.756783	0.743993	0.51	1.08	0.328289	0.899957	1.21941	0.82	1.82	0.370403	0.89908	0.839016	0.57	1.23
RAB21	203885_at	0.00891231	0.653569	2.13439	1.21	3.77	0.00175348	0.748984	1.78334	1.24	2.56	0.0662101	0.792574	1.68016	0.97	2.92	0.0119275	0.704337	1.56204	1.1	2.21
SIGMAR1	201692_at	0.696415	0.998794	1.09901	0.68	1.77	0.280628	0.771727	1.15819	0.89	1.51	0.753567	0.908457	1.07176	0.7	1.65	0.11171	0.842809	1.22294	0.95	1.57
RNMT	202683_s_at	0.406029	0.998794	0.724335	0.34	1.55	0.946465	0.980703	0.988191	0.7	1.4	0.662694	0.899957	0.833274	0.37	1.89	0.991621	0.997798	1.00194	0.7	1.44
DCUN1D1	222679_s_at	0.99181	0.998794	1.00088	0.85	1.18	0.201727	0.756783	1.09352	0.95	1.25	0.552534	0.899957	0.943822	0.78	1.14	0.557645	0.924379	1.04294	0.91	1.2
DCUN1D1	222678_s_at	0.99181	0.998794	1.00088	0.85	1.18	0.189339	0.756783	1.08955	0.96	1.24	0.552534	0.899957	0.943822	0.78	1.14	0.567553	0.924466	1.04061	0.91	1.19
PIK3R4	212740_at	0.903097	0.998794	0.957496	0.48	1.93	0.774878	0.936549	0.950578	0.67	1.35	0.746132	0.908457	0.893663	0.45	1.77	0.285407	0.89908	0.82247	0.57	1.18
KAT6A	202423_at	0.763587	0.998794	1.05648	0.74	1.51	0.732455	0.920801	1.05283	0.78	1.41	0.470708	0.899957	1.14931	0.79	1.68	0.380696	0.89908	1.14498	0.85	1.55
CLTA	204050_s_at	0.375071	0.998794	1.2261	0.78	1.92	0.210429	0.756783	1.24612	0.88	1.76	0.328289	0.899957	1.21941	0.82	1.82	0.112401	0.842809	1.31844	0.94	1.85
MRPS22	228059_x_at	0.890872	0.998794	1.04137	0.58	1.86	0.2638	0.756783	1.1872	0.88	1.6	0.689286	0.899957	0.89221	0.51	1.56	0.72589	0.94295	1.05613	0.78	1.43
TRIT1	218617_at	0.0403827	0.998794	0.395775	0.16	0.96	0.367703	0.784058	0.900285	0.72	1.13	0.0441933	0.792574	0.403268	0.17	0.98	0.36284	0.89908	0.901104	0.72	1.13
WHSC1L1	222544_s_at	0.861894	0.998794	0.974194	0.73	1.31	0.683421	0.908911	1.04092	0.86	1.26	0.847708	0.927891	0.971515	0.72	1.3	0.750074	0.94295	1.03249	0.85	1.26
ORC2	204853_at	0.698785	0.998794	1.14634	0.57	2.29	0.0311474	0.756783	1.35824	1.03	1.79	0.65136	0.899957	1.18123	0.57	2.43	0.0762862	0.842809	1.30221	0.97	1.74
CMAS	218111_s_at	0.857885	0.998794	1.04108	0.67	1.62	0.0535422	0.756783	1.21308	1	1.48	0.927695	0.95061	1.0217	0.64	1.62	0.367671	0.89908	1.10075	0.89	1.36
ARMC1	222550_at	0.619125	0.998794	1.18092	0.61	2.27	0.268521	0.757367	1.23029	0.85	1.78	0.662637	0.899957	1.16577	0.59	2.32	0.277231	0.89908	1.23664	0.84	1.81
HECTD1	224481_s_at	0.831468	0.998794	1.05493	0.64	1.73	0.922339	0.979504	0.98298	0.7	1.39	0.139926	0.843391	1.45996	0.88	2.41	0.369935	0.89908	1.18364	0.82	1.71
SIAH1	202980_s_at	0.396967	0.998794	0.74991	0.39	1.46	0.337769	0.78385	1.1529	0.86	1.54	0.615717	0.899957	0.838192	0.42	1.67	0.38837	0.89908	1.15017	0.84	1.58
RAB21	239329_at	0.00891231	0.653569	2.13439	1.21	3.77	0.0123375	0.748984	1.4287	1.08	1.89	0.0662101	0.792574	1.68016	0.97	2.92	0.0350239	0.761854	1.32953	1.02	1.73
LONP2	223098_s_at	0.409278	0.998794	0.762846	0.4	1.45	0.182407	0.756783	1.18594	0.92	1.52	0.560413	0.899957	0.815627	0.41	1.62	0.168822	0.847598	1.2141	0.92	1.6
NOA1	223157_at	0.0231948	0.998794	0.332081	0.13	0.86	0.341173	0.78385	0.841945	0.59	1.2	0.0274964	0.792574	0.326634	0.12	0.88	0.6417	0.934928	0.920332	0.65	1.31
ATP11B	238811_at	0.983514	0.998794	1.00176	0.85	1.18	0.36038	0.784058	1.08443	0.91	1.29	0.559794	0.899957	0.944831	0.78	1.14	0.908985	0.98774	1.01097	0.84	1.22
UBE2R2	223014_at	0.537179	0.998794	1.16586	0.72	1.9	0.935359	0.980703	0.983356	0.66	1.48	0.629258	0.899957	1.11666	0.71	1.75	0.960351	0.992791	1.01005	0.68	1.5
LOC100506233	228612_at	0.157709	0.998794	1.61967	0.83	3.16	0.420589	0.812075	0.889963	0.67	1.18	0.0971652	0.792574	1.66078	0.91	3.02	0.450487	0.89908	0.896799	0.68	1.19
PPAPDC2	227385_at	0.182412	0.998794	1.35248	0.87	2.11	0.968496	0.982681	1.00572	0.76	1.33	0.272989	0.899957	1.23765	0.85	1.81	0.901934	0.98774	1.01776	0.77	1.35
SIGMAR1	214484_s_at	0.696415	0.998794	1.09901	0.68	1.77	0.389251	0.799891	1.1043	0.88	1.38	0.753567	0.908457	1.07176	0.7	1.65	0.285377	0.89908	1.12317	0.91	1.39
CCDC91	218545_at	0.821397	0.998794	1.05147	0.68	1.63	0.355446	0.78385	1.13571	0.87	1.49	0.89505	0.948568	1.03105	0.65	1.62	0.725402	0.94295	1.05154	0.79	1.39
BRMS1L	226580_at	0.899113	0.998794	1.02026	0.75	1.39	0.531545	0.878111	0.92645	0.73	1.18	0.187542	0.899957	1.23048	0.9	1.68	0.914627	0.98774	0.986151	0.76	1.27
UBAP2	219192_at	0.585196	0.998794	1.14747	0.7	1.88	0.0881363	0.756783	1.23489	0.97	1.57	0.670725	0.899957	1.10247	0.7	1.73	0.138426	0.842809	1.19688	0.94	1.52
MRPS22	223448_x_at	0.890872	0.998794	1.04137	0.58	1.86	0.215205	0.756783	1.1965	0.9	1.59	0.689286	0.899957	0.89221	0.51	1.56	0.695157	0.94295	1.05943	0.79	1.41
MDM2	205386_s_at	0.105007	0.998794	1.25158	0.95	1.64	0.11874	0.756783	1.21427	0.95	1.55	0.295886	0.899957	1.14872	0.89	1.49	0.23147	0.89908	1.1504	0.91	1.45
BAG4	219624_at	0.708174	0.998794	0.943868	0.7	1.28	0.692276	0.908911	1.03413	0.88	1.22	0.755671	0.908457	0.953556	0.71	1.29	0.722677	0.94295	1.03197	0.87	1.23
ALS2	226291_at	0.877695	0.998794	1.05794	0.52	2.17	0.75955	0.936549	1.05456	0.75	1.48	0.824887	0.927891	1.08833	0.51	2.3	0.904038	0.98774	1.02219	0.72	1.46
TBC1D15	218268_at	0.00782651	0.653569	2.15281	1.22	3.79	0.0677121	0.756783	1.47852	0.97	2.25	0.0607024	0.792574	1.69397	0.98	2.94	0.139343	0.842809	1.36284	0.9	2.05
CAND1	208838_at	0.310656	0.998794	1.15431	0.87	1.52	0.121622	0.756783	1.19584	0.95	1.5	0.469299	0.899957	1.10594	0.84	1.45	0.340497	0.89908	1.11721	0.89	1.4
PAF1	202093_s_at	0.641561	0.998794	0.89664	0.57	1.42	0.831844	0.957325	1.04136	0.72	1.51	0.371415	0.899957	0.809507	0.51	1.29	0.773018	0.953999	0.94559	0.65	1.38
SOX2-OT	231898_x_at	0.944583	0.998794	1.00542	0.86	1.17	0.863542	0.969281	0.993961	0.93	1.07	0.657633	0.899957	0.96117	0.81	1.15	0.257059	0.89908	0.958561	0.89	1.03
RNF7	224439_x_at	0.705742	0.998794	0.890798	0.49	1.62	0.833308	0.957325	1.03096	0.78	1.37	0.351475	0.899957	0.758085	0.42	1.36	0.398139	0.89908	0.883118	0.66	1.18
CLTA	216295_s_at	0.375071	0.998794	1.2261	0.78	1.92	0.353378	0.78385	1.18491	0.83	1.7	0.328289	0.899957	1.21941	0.82	1.82	0.161492	0.845909	1.29062	0.9	1.84
RPP25L	225403_at	0.696415	0.998794	1.09901	0.68	1.77	0.461931	0.850211	1.13924	0.8	1.61	0.753567	0.908457	1.07176	0.7	1.65	0.369301	0.89908	1.16589	0.83	1.63
USB1	218060_s_at	0.318215	0.998794	0.690493	0.33	1.43	0.85387	0.968307	1.03998	0.69	1.58	0.514461	0.899957	0.780544	0.37	1.64	0.30215	0.89908	1.25589	0.81	1.94
CAND1	243910_x_at	0.310656	0.998794	1.15431	0.87	1.52	0.221544	0.756783	1.18555	0.9	1.56	0.469299	0.899957	1.10594	0.84	1.45	0.334567	0.89908	1.13781	0.88	1.48
KIAA1432	223825_at	0.205196	0.998794	1.34071	0.85	2.11	0.0215531	0.756783	1.3432	1.04	1.73	0.286835	0.899957	1.23345	0.84	1.81	0.0285902	0.704337	1.3061	1.03	1.66
CDC37L1	235787_at	0.182412	0.998794	1.35248	0.87	2.11	0.869577	0.971438	1.02676	0.75	1.41	0.272989	0.899957	1.23765	0.85	1.81	0.959037	0.992791	0.99182	0.72	1.36
NIF3L1	218133_s_at	0.698785	0.998794	1.14634	0.57	2.29	0.349853	0.78385	1.21043	0.81	1.81	0.65136	0.899957	1.18123	0.57	2.43	0.731393	0.94295	1.07467	0.71	1.62
CDC37L1	228561_at	0.182412	0.998794	1.35248	0.87	2.11	0.921216	0.979504	1.01485	0.76	1.36	0.272989	0.899957	1.23765	0.85	1.81	0.963267	0.992791	1.00679	0.75	1.34
LANCL2	222561_at	0.983572	0.998794	1.00321	0.74	1.36	0.589219	0.892553	1.08448	0.81	1.46	0.929005	0.95061	1.01358	0.75	1.36	0.409566	0.89908	1.13276	0.84	1.52
C12orf66	1554068_s_at	0.945238	0.998794	1.02244	0.54	1.93	0.791719	0.936549	1.04737	0.74	1.48	0.668569	0.899957	1.15848	0.59	2.27	0.984115	0.997798	0.996404	0.7	1.42
UBXN2B	238903_at	0.91301	0.998794	1.02946	0.61	1.73	0.631528	0.893254	1.07993	0.79	1.48	0.90773	0.948568	1.03324	0.59	1.8	0.533275	0.912261	1.11058	0.8	1.54
NFYC	202215_s_at	0.068229	0.998794	0.410241	0.16	1.07	0.0241053	0.756783	0.625246	0.42	0.94	0.0700616	0.792574	0.387588	0.14	1.08	0.0709544	0.842809	0.684563	0.45	1.03
INTS4	225169_at	0.523455	0.998794	1.3147	0.57	3.05	0.83096	0.957325	1.0471	0.69	1.6	0.175542	0.899957	1.72269	0.78	3.78	0.271141	0.89908	1.2804	0.82	1.99
EXOC1	222127_s_at	0.00780106	0.653569	0.256451	0.09	0.7	0.139686	0.756783	0.743627	0.5	1.1	0.0095708	0.715569	0.255542	0.09	0.72	0.170571	0.847598	0.749424	0.5	1.13
PPP2R3C	239188_at	0.893316	0.998794	1.02253	0.74	1.42	0.210832	0.756783	0.782654	0.53	1.15	0.0831643	0.792574	1.31869	0.96	1.8	0.606475	0.924466	0.903982	0.62	1.33
ERLIN2	221542_s_at	0.433261	0.998794	0.876289	0.63	1.22	0.229	0.756783	0.886036	0.73	1.08	0.477303	0.899957	0.888109	0.64	1.23	0.266002	0.89908	0.88919	0.72	1.09
MAU2	212505_s_at	0.529526	0.998794	0.792429	0.38	1.64	0.351241	0.78385	0.812484	0.53	1.26	0.557309	0.899957	0.790638	0.36	1.73	0.332088	0.89908	0.793478	0.5	1.27
HINT2	224415_s_at	0.522236	0.998794	1.16652	0.73	1.87	0.539998	0.878111	0.905567	0.66	1.24	0.53185	0.899957	1.14493	0.75	1.75	0.923633	0.98774	0.984925	0.72	1.34
STRN3	204496_at	0.766279	0.998794	1.07711	0.66	1.76	0.988805	0.992726	1.00196	0.76	1.32	0.123401	0.834275	1.48113	0.9	2.44	0.604422	0.924466	1.07782	0.81	1.43
CFL2	224352_s_at	0.963547	0.998794	1.00774	0.72	1.4	0.260159	0.756783	0.863626	0.67	1.11	0.0952288	0.792574	1.30906	0.95	1.8	0.999992	0.999992	0.999999	0.76	1.32
WHSC1L1	221248_s_at	0.861894	0.998794	0.974194	0.73	1.31	0.374134	0.787651	1.11799	0.87	1.43	0.847708	0.927891	0.971515	0.72	1.3	0.377973	0.89908	1.12137	0.87	1.45
WDR12	218512_at	0.701952	0.998794	1.14419	0.57	2.28	0.141856	0.756783	1.20506	0.94	1.55	0.680382	0.899957	1.16461	0.56	2.4	0.12305	0.842809	1.22492	0.95	1.59
RGP1	203169_at	0.529874	0.998794	1.16308	0.73	1.86	0.790661	0.936549	1.04881	0.74	1.49	0.495088	0.899957	1.15645	0.76	1.76	0.781699	0.953999	1.05006	0.74	1.48
DDHD2	212690_at	0.708174	0.998794	0.943868	0.7	1.28	0.362036	0.784058	0.904099	0.73	1.12	0.755671	0.908457	0.953556	0.71	1.29	0.512467	0.912261	0.930723	0.75	1.15
KBTBD2	212447_at	0.715597	0.998794	1.08283	0.71	1.66	0.502172	0.86217	1.12415	0.8	1.58	0.333752	0.899957	1.24187	0.8	1.93	0.310577	0.89908	1.21028	0.84	1.75
MDM2	211832_s_at	0.105007	0.998794	1.25158	0.95	1.64	0.0479091	0.756783	1.58107	1	2.49	0.295886	0.899957	1.14872	0.89	1.49	0.24839	0.89908	1.30551	0.83	2.05
VDAC3	208846_s_at	0.617485	0.998794	1.09249	0.77	1.55	0.0133342	0.748984	1.33668	1.06	1.68	0.321159	0.899957	1.20346	0.83	1.74	0.023463	0.704337	1.33615	1.04	1.72
VDAC3	208845_at	0.617485	0.998794	1.09249	0.77	1.55	0.0305149	0.756783	1.42329	1.03	1.96	0.321159	0.899957	1.20346	0.83	1.74	0.0534322	0.814507	1.40528	0.99	1.98
SF3A3	203818_s_at	0.0940434	0.998794	0.453229	0.18	1.14	0.486745	0.850211	0.882459	0.62	1.26	0.132726	0.834275	0.469149	0.17	1.26	0.731907	0.94295	0.938945	0.65	1.35
PNN	1567213_at	0.521624	0.998794	1.11985	0.79	1.58	0.40789	0.808009	1.10722	0.87	1.41	0.0512663	0.792574	1.40009	1	1.96	0.440336	0.89908	1.10647	0.86	1.43
C14orf166	217768_at	0.297462	0.998794	1.51947	0.69	3.34	0.213585	0.756783	1.34441	0.84	2.14	0.0255178	0.792574	2.46238	1.12	5.43	0.0250383	0.704337	1.76951	1.07	2.92
UBE2V2	230411_at	0.947826	0.998794	1.01619	0.63	1.64	0.597728	0.893254	1.08339	0.8	1.46	0.890936	0.948568	1.03568	0.63	1.71	0.968019	0.99516	1.00637	0.74	1.37
WRNIP1	222489_s_at	0.813941	0.998794	1.08992	0.53	2.23	0.595868	0.893254	1.10239	0.77	1.58	0.499765	0.899957	1.29047	0.62	2.71	0.458073	0.89908	1.14694	0.8	1.65
DYRK2	202968_s_at	0.208528	0.998794	1.17097	0.92	1.5	0.260454	0.756783	1.17585	0.89	1.56	0.42394	0.899957	1.10381	0.87	1.41	0.616029	0.924466	1.07442	0.81	1.42
TMEM126B	221622_s_at	0.418741	0.998794	1.49464	0.56	3.96	0.784337	0.936549	1.05334	0.73	1.53	0.248083	0.899957	1.70365	0.69	4.21	0.362794	0.89908	1.20136	0.81	1.78
LEMD3	218604_at	0.530993	0.998794	1.17479	0.71	1.94	0.319513	0.77952	1.19157	0.84	1.68	0.516741	0.899957	1.17721	0.72	1.93	0.718199	0.94295	1.06532	0.76	1.5
SS18	202816_s_at	0.761032	0.998794	1.09189	0.62	1.92	0.47166	0.850211	1.10155	0.85	1.43	0.685349	0.899957	1.12845	0.63	2.02	0.617712	0.924466	1.07043	0.82	1.4
LOC100129794	230307_at	0.900213	0.998794	1.01534	0.8	1.29	0.563892	0.882215	0.939052	0.76	1.16	0.291724	0.899957	1.13401	0.9	1.43	0.917022	0.98774	1.01164	0.81	1.26
DYRK2	202969_at	0.208528	0.998794	1.17097	0.92	1.5	0.189569	0.756783	1.18825	0.92	1.54	0.42394	0.899957	1.10381	0.87	1.41	0.388781	0.89908	1.1156	0.87	1.43
FXR1	201636_at	0.464483	0.998794	1.08087	0.88	1.33	0.34951	0.78385	1.08581	0.91	1.29	0.869279	0.937458	0.980666	0.78	1.24	0.871102	0.98774	0.985481	0.83	1.18
SS18	202817_s_at	0.761032	0.998794	1.09189	0.62	1.92	0.484893	0.850211	0.901829	0.67	1.21	0.685349	0.899957	1.12845	0.63	2.02	0.237442	0.89908	0.838621	0.63	1.12
SUMO1	211069_s_at	0.644936	0.998794	1.17241	0.6	2.31	0.315647	0.77952	1.26083	0.8	1.98	0.625308	0.899957	1.19426	0.59	2.44	0.526684	0.912261	1.16524	0.73	1.87
CPSF6	226934_at	0.153439	0.998794	1.20161	0.93	1.55	0.160499	0.756783	0.873182	0.72	1.06	0.329213	0.899957	1.12384	0.89	1.42	0.061841	0.842809	0.833407	0.69	1.01
ERLIN2	221543_s_at	0.433261	0.998794	0.876289	0.63	1.22	0.216484	0.756783	0.877348	0.71	1.08	0.477303	0.899957	0.888109	0.64	1.23	0.227501	0.89908	0.875095	0.7	1.09
RAB3IP	231399_at	0.459243	0.998794	1.10733	0.85	1.45	0.96928	0.982681	0.996571	0.84	1.19	0.651809	0.899957	1.06117	0.82	1.37	0.91955	0.98774	1.00905	0.85	1.2
FBXO33	226970_at	0.303929	0.998794	1.19498	0.85	1.68	0.57419	0.886468	0.936139	0.74	1.18	0.0196622	0.715569	1.4791	1.06	2.06	0.899747	0.98774	0.984533	0.77	1.25
RNF7	218286_s_at	0.705742	0.998794	0.890798	0.49	1.62	0.961545	0.980703	1.00676	0.77	1.32	0.351475	0.899957	0.758085	0.42	1.36	0.369951	0.89908	0.881172	0.67	1.16
FGFR1OP2	223263_s_at	0.733062	0.998794	1.07675	0.7	1.65	0.881092	0.97603	1.02085	0.78	1.34	0.849864	0.927891	1.04449	0.67	1.64	0.883679	0.98774	0.979631	0.74	1.29
CCDC90B	218288_s_at	0.185081	0.998794	1.58338	0.8	3.12	0.486939	0.850211	1.11143	0.83	1.5	0.118554	0.834275	1.62473	0.88	2.99	0.445707	0.89908	1.12365	0.83	1.52
CAND1	208839_s_at	0.310656	0.998794	1.15431	0.87	1.52	0.0874499	0.756783	1.22023	0.97	1.53	0.469299	0.899957	1.10594	0.84	1.45	0.272595	0.89908	1.13827	0.9	1.43
ATR	209902_at	0.694031	0.998794	0.887592	0.49	1.61	0.884224	0.97603	0.976212	0.71	1.35	0.351845	0.899957	0.760515	0.43	1.35	0.496612	0.912261	0.895727	0.65	1.23
GALT	203179_at	0.696415	0.998794	1.09901	0.68	1.77	0.790718	0.936549	1.04985	0.73	1.5	0.753567	0.908457	1.07176	0.7	1.65	0.443189	0.89908	1.1415	0.81	1.6
TPCN2	242554_at	0.0429009	0.998794	1.42656	1.01	2.01	0.185096	0.756783	1.31781	0.88	1.98	0.0699526	0.792574	1.35005	0.98	1.87	0.227463	0.89908	1.27833	0.86	1.9
EID2	225936_at	0.786008	0.998794	0.937649	0.59	1.49	0.863031	0.969281	1.02347	0.79	1.33	0.409031	0.899957	0.820681	0.51	1.31	0.72775	0.94295	0.955092	0.74	1.24
MBIP	218411_s_at	0.672923	0.998794	1.04662	0.85	1.29	0.255586	0.756783	0.918673	0.79	1.06	0.154835	0.899957	1.16461	0.94	1.44	0.603549	0.924466	0.961281	0.83	1.12
NDUFA13	220864_s_at	0.525362	0.998794	0.790319	0.38	1.63	0.942898	0.980703	0.984656	0.64	1.5	0.539061	0.899957	0.781338	0.36	1.72	0.931641	0.98774	1.01978	0.65	1.6
DNAJC19	225359_at	0.491233	0.998794	1.07605	0.87	1.33	0.2047	0.756783	1.12714	0.94	1.36	0.844763	0.927891	0.977085	0.77	1.23	0.59737	0.924466	1.05325	0.87	1.28
LOC100506233	228643_at	0.157709	0.998794	1.61967	0.83	3.16	0.986714	0.992726	1.00283	0.72	1.4	0.0971652	0.792574	1.66078	0.91	3.02	0.936108	0.98774	0.986324	0.7	1.38
FAM117B	226431_at	0.701952	0.998794	1.14419	0.57	2.28	0.820472	0.957189	1.01997	0.86	1.21	0.680382	0.899957	1.16461	0.56	2.4	0.664008	0.935343	0.960801	0.8	1.15
FRS2	238486_at	0.391877	0.998794	1.11446	0.87	1.43	0.0472319	0.756783	1.40369	1	1.96	0.600202	0.899957	1.06539	0.84	1.35	0.143298	0.842809	1.27074	0.92	1.75
PROSC	209384_at	0.433261	0.998794	0.876289	0.63	1.22	0.806899	0.946761	0.9677	0.74	1.26	0.477303	0.899957	0.888109	0.64	1.23	0.898189	0.98774	1.01734	0.78	1.32
SUMO1	208761_s_at	0.644936	0.998794	1.17241	0.6	2.31	0.609871	0.893254	1.11428	0.74	1.69	0.625308	0.899957	1.19426	0.59	2.44	0.787049	0.953999	0.94057	0.6	1.47
DYRK2	202971_s_at	0.208528	0.998794	1.17097	0.92	1.5	0.0890439	0.756783	1.21819	0.97	1.53	0.42394	0.899957	1.10381	0.87	1.41	0.222841	0.89908	1.15259	0.92	1.45
CSNK2A2	224922_at	0.307884	0.998794	0.681656	0.33	1.42	0.320491	0.77952	1.18798	0.85	1.67	0.493033	0.899957	0.76728	0.36	1.64	0.159709	0.845909	1.30163	0.9	1.88
CLTA	200960_x_at	0.375071	0.998794	1.2261	0.78	1.92	0.291684	0.77952	1.2362	0.83	1.83	0.328289	0.899957	1.21941	0.82	1.82	0.117326	0.842809	1.36311	0.93	2.01
RNF7	224395_s_at	0.705742	0.998794	0.890798	0.49	1.62	0.656851	0.893254	1.06646	0.8	1.42	0.351475	0.899957	0.758085	0.42	1.36	0.522827	0.912261	0.910329	0.68	1.21
TYW5	235686_at	0.848835	0.998794	1.06934	0.54	2.13	0.215164	0.756783	1.25136	0.88	1.78	0.928627	0.95061	1.03407	0.5	2.15	0.471146	0.908288	1.1493	0.79	1.68
NUDT14	231914_at	0.353567	0.998794	0.839113	0.58	1.22	0.904425	0.978988	0.983488	0.75	1.29	0.683081	0.899957	0.931908	0.66	1.31	0.992542	0.997798	1.00138	0.75	1.34
EIF4EBP1	221539_at	0.370862	0.998794	0.857537	0.61	1.2	0.237101	0.756783	1.09342	0.94	1.27	0.403764	0.899957	0.867416	0.62	1.21	0.188538	0.855223	1.10707	0.95	1.29
TM7SF3	222477_s_at	0.733062	0.998794	1.07675	0.7	1.65	0.738068	0.922967	0.95555	0.73	1.25	0.849864	0.927891	1.04449	0.67	1.64	0.534917	0.912261	0.911259	0.68	1.22
CST3	201360_at	0.710907	0.998794	1.04884	0.82	1.35	0.166362	0.756783	0.864932	0.7	1.06	0.551354	0.899957	1.07989	0.84	1.39	0.35791	0.89908	0.909687	0.74	1.11
ZNF713	1560201_at	0.813666	0.998794	0.950242	0.62	1.45	0.266594	0.756783	1.20178	0.87	1.66	0.822553	0.927891	0.954811	0.64	1.43	0.0862471	0.842809	1.31659	0.96	1.8
FXR1	201637_s_at	0.464483	0.998794	1.08087	0.88	1.33	0.0995074	0.756783	1.18592	0.97	1.45	0.869279	0.937458	0.980666	0.78	1.24	0.320689	0.89908	1.11272	0.9	1.37
GMPS	214431_at	0.943358	0.998794	0.982373	0.6	1.6	0.253758	0.756783	1.12452	0.92	1.38	0.481893	0.899957	0.841	0.52	1.36	0.681723	0.94295	1.04386	0.85	1.28
C8orf40	225534_at	0.584238	0.998794	1.10401	0.77	1.57	0.637666	0.893254	0.940294	0.73	1.21	0.389246	0.899957	1.1807	0.81	1.72	0.665369	0.935343	0.943078	0.72	1.23
PPFIA1	202066_at	0.255438	0.998794	1.11947	0.92	1.36	0.0953476	0.756783	1.25204	0.96	1.63	0.115	0.834275	1.16377	0.96	1.41	0.0268051	0.704337	1.3563	1.04	1.78
GOLT1B	222552_at	0.780739	0.998794	1.05932	0.71	1.59	0.698021	0.908911	1.06633	0.77	1.47	0.901757	0.948568	1.02743	0.67	1.58	0.917872	0.98774	0.981597	0.69	1.4
BRF2	218955_at	0.433261	0.998794	0.876289	0.63	1.22	0.396309	0.799891	0.873236	0.64	1.19	0.477303	0.899957	0.888109	0.64	1.23	0.438302	0.89908	0.877057	0.63	1.22
PPIE	210502_s_at	0.0644581	0.998794	0.400187	0.15	1.06	0.533395	0.878111	0.899099	0.64	1.26	0.0950613	0.792574	0.412669	0.15	1.17	0.419937	0.89908	0.866393	0.61	1.23
MEAF6	228517_at	0.0940434	0.998794	0.453229	0.18	1.14	0.394649	0.799891	0.862496	0.61	1.21	0.132726	0.834275	0.469149	0.17	1.26	0.598194	0.924466	0.909966	0.64	1.29
HEATR5A	226510_at	0.898692	0.998794	1.03305	0.63	1.7	0.577733	0.888613	0.940338	0.76	1.17	0.163039	0.899957	1.43664	0.86	2.39	0.467787	0.908288	1.09026	0.86	1.38
KLHL42	225963_at	0.759043	0.998794	1.06912	0.7	1.64	0.106987	0.756783	1.17336	0.97	1.43	0.824848	0.927891	1.05145	0.67	1.64	0.284778	0.89908	1.11834	0.91	1.37
NGDN	213794_s_at	0.966683	0.998794	0.983699	0.45	2.13	0.905564	0.978988	1.02334	0.7	1.5	0.191426	0.899957	1.67819	0.77	3.65	0.523247	0.912261	1.14244	0.76	1.72
LONP2	223099_s_at	0.409278	0.998794	0.762846	0.4	1.45	0.659761	0.893254	1.06619	0.8	1.42	0.560413	0.899957	0.815627	0.41	1.62	0.629898	0.926941	1.07804	0.79	1.46
PROSC	214545_s_at	0.433261	0.998794	0.876289	0.63	1.22	0.76829	0.936549	0.965203	0.76	1.22	0.477303	0.899957	0.888109	0.64	1.23	0.649934	0.935343	0.946163	0.75	1.2
UBXN2B	212934_at	0.91301	0.998794	1.02946	0.61	1.73	0.534254	0.878111	0.896691	0.64	1.26	0.90773	0.948568	1.03324	0.59	1.8	0.469612	0.908288	0.876265	0.61	1.25
C2orf69	238974_at	0.848835	0.998794	1.06934	0.54	2.13	0.231565	0.756783	1.21006	0.89	1.65	0.928627	0.95061	1.03407	0.5	2.15	0.366929	0.89908	1.1576	0.84	1.59
STAU1	207320_x_at	0.539716	0.998794	0.792987	0.38	1.66	0.351763	0.78385	0.800422	0.5	1.28	0.663708	0.899957	0.842714	0.39	1.82	0.252067	0.89908	0.756781	0.47	1.22
ZC3H15	201595_s_at	0.69306	0.998794	1.20576	0.48	3.05	0.698422	0.908911	1.08054	0.73	1.6	0.385316	0.899957	1.50741	0.6	3.81	0.657424	0.935343	1.09851	0.73	1.66
C12orf66	1554067_at	0.945238	0.998794	1.02244	0.54	1.93	0.657623	0.893254	0.936877	0.7	1.25	0.668569	0.899957	1.15848	0.59	2.27	0.627594	0.926648	0.930467	0.7	1.24
C2orf47	219176_at	0.821307	0.998794	1.08196	0.55	2.14	0.106979	0.756783	1.34876	0.94	1.94	0.900594	0.948568	1.04743	0.51	2.17	0.166739	0.847598	1.30713	0.89	1.91
COPS5	201652_at	0.596539	0.998794	1.17626	0.64	2.15	0.246667	0.756783	1.20936	0.88	1.67	0.54449	0.899957	1.21757	0.64	2.3	0.512026	0.912261	1.12288	0.79	1.59
DCTN2	200932_s_at	0.693961	0.998794	1.1172	0.64	1.94	0.235651	0.756783	1.29156	0.85	1.97	0.424173	0.899957	1.26979	0.71	2.28	0.433499	0.89908	1.20526	0.76	1.92
STAU1	208948_s_at	0.539716	0.998794	0.792987	0.38	1.66	0.497697	0.862153	0.848544	0.53	1.36	0.663708	0.899957	0.842714	0.39	1.82	0.437453	0.89908	0.825922	0.51	1.34
MTFR1	203208_s_at	0.619125	0.998794	1.18092	0.61	2.27	0.161646	0.756783	1.18729	0.93	1.51	0.662637	0.899957	1.16577	0.59	2.32	0.140443	0.842809	1.20196	0.94	1.54
FASTKD2	205976_at	0.99377	0.998794	1.00228	0.57	1.77	0.919466	0.979504	1.01186	0.81	1.27	0.997565	0.997565	0.999096	0.56	1.79	0.714115	0.94295	1.04463	0.83	1.32
NDUFB9	222992_s_at	0.778248	0.998794	1.07136	0.66	1.73	0.842579	0.965455	1.03183	0.76	1.41	0.652344	0.899957	1.1213	0.68	1.85	0.998844	0.999992	1.00024	0.72	1.38
DNALI1	205186_at	0.0940434	0.998794	0.453229	0.18	1.14	0.353528	0.78385	0.927891	0.79	1.09	0.132726	0.834275	0.469149	0.17	1.26	0.702771	0.94295	0.969281	0.83	1.14
KPNA4	225268_at	0.86129	0.998794	1.04377	0.65	1.69	0.129483	0.756783	1.24184	0.94	1.64	0.744273	0.908457	0.924386	0.58	1.48	0.380086	0.89908	1.13406	0.86	1.5
WHSC1L1	218173_s_at	0.861894	0.998794	0.974194	0.73	1.31	0.728329	0.919874	0.959655	0.76	1.21	0.847708	0.927891	0.971515	0.72	1.3	0.499377	0.912261	0.92003	0.72	1.17
ZMPSTE24	202939_at	0.0533793	0.998794	0.38739	0.15	1.01	0.125752	0.756783	0.725177	0.48	1.09	0.0651624	0.792574	0.382654	0.14	1.06	0.509086	0.912261	0.868838	0.57	1.32
C18orf8	221190_s_at	0.263511	0.998794	0.642861	0.3	1.39	0.226766	0.756783	0.79481	0.55	1.15	0.257977	0.899957	0.630804	0.28	1.4	0.24481	0.89908	0.800835	0.55	1.16
PROSC	209385_s_at	0.433261	0.998794	0.876289	0.63	1.22	0.645052	0.893254	0.939036	0.72	1.23	0.477303	0.899957	0.888109	0.64	1.23	0.757576	0.94697	0.957727	0.73	1.26
TBK1	218520_at	0.878466	0.998794	1.04983	0.56	1.96	0.245561	0.756783	1.28927	0.84	1.98	0.597924	0.899957	1.19515	0.62	2.32	0.352232	0.89908	1.22953	0.8	1.9
TRAPPC8	207305_s_at	0.562776	0.998794	0.797489	0.37	1.72	0.645623	0.893254	0.911136	0.61	1.35	0.604417	0.899957	0.80472	0.35	1.83	0.620075	0.924857	0.900414	0.59	1.36
CFL2	224663_s_at	0.963547	0.998794	1.00774	0.72	1.4	0.748355	0.930159	0.963057	0.77	1.21	0.0952288	0.792574	1.30906	0.95	1.8	0.274514	0.89908	1.15266	0.89	1.49
PACS2	1555824_a_at	0.375166	0.998794	0.852173	0.6	1.21	0.501214	0.86217	1.11611	0.81	1.54	0.721454	0.901818	0.942333	0.68	1.31	0.154674	0.845909	1.27632	0.91	1.79
TMEM68	227936_at	0.584249	0.998794	1.18446	0.65	2.17	0.250229	0.756783	1.12129	0.92	1.36	0.497527	0.899957	1.24286	0.66	2.33	0.344626	0.89908	1.10328	0.9	1.35
BAG4	222909_s_at	0.708174	0.998794	0.943868	0.7	1.28	0.778479	0.936549	0.96972	0.78	1.2	0.755671	0.908457	0.953556	0.71	1.29	0.725519	0.94295	0.960576	0.77	1.2
TYW5	235181_at	0.848835	0.998794	1.06934	0.54	2.13	0.235259	0.756783	1.2517	0.86	1.81	0.928627	0.95061	1.03407	0.5	2.15	0.24974	0.89908	1.25229	0.85	1.84
POP4	202868_s_at	0.94095	0.998794	0.979656	0.57	1.69	0.211239	0.756783	1.21796	0.89	1.66	0.949584	0.962712	1.0187	0.57	1.81	0.263824	0.89908	1.20707	0.87	1.68
MRPS12	204331_s_at	0.539917	0.998794	0.858802	0.53	1.4	0.508431	0.86217	1.07062	0.87	1.31	0.294458	0.899957	0.768945	0.47	1.26	0.722544	0.94295	0.962836	0.78	1.19
G2E3	223255_at	0.917018	0.998794	1.0273	0.62	1.71	0.339077	0.78385	1.10963	0.9	1.37	0.177763	0.899957	1.426	0.85	2.39	0.170023	0.847598	1.17094	0.93	1.47
STK3	204068_at	0.859191	0.998794	0.956157	0.58	1.57	0.632247	0.893254	1.06936	0.81	1.41	0.878067	0.942316	1.03972	0.63	1.71	0.929743	0.98774	0.986884	0.74	1.32
PSMD8	200820_at	0.733204	0.998794	0.918651	0.56	1.5	0.100457	0.756783	1.26955	0.95	1.69	0.365779	0.899957	0.797299	0.49	1.3	0.565429	0.924466	1.08997	0.81	1.46
CWC15	223067_at	0.542322	0.998794	1.4074	0.47	4.23	0.43251	0.822213	0.80625	0.47	1.38	0.445241	0.899957	1.51365	0.52	4.39	0.458309	0.89908	0.809557	0.46	1.41
RAB3IP	1565800_x_at	0.459243	0.998794	1.10733	0.85	1.45	0.00708948	0.748984	1.95921	1.2	3.2	0.651809	0.899957	1.06117	0.82	1.37	0.0517488	0.814507	1.58398	1	2.52
UBE2V2	209096_at	0.947826	0.998794	1.01619	0.63	1.64	0.0453601	0.756783	1.31459	1.01	1.72	0.890936	0.948568	1.03568	0.63	1.71	0.0491318	0.814507	1.33094	1	1.77
DCTN3	204246_s_at	0.696415	0.998794	1.09901	0.68	1.77	0.550981	0.88157	1.10664	0.79	1.54	0.753567	0.908457	1.07176	0.7	1.65	0.571733	0.924466	1.09755	0.79	1.52
BRF2	218954_s_at	0.433261	0.998794	0.876289	0.63	1.22	0.468571	0.850211	0.909644	0.7	1.18	0.477303	0.899957	0.888109	0.64	1.23	0.419163	0.89908	0.894842	0.68	1.17
RP9P	227035_x_at	0.715597	0.998794	1.08283	0.71	1.66	0.83099	0.957325	1.03894	0.73	1.48	0.333752	0.899957	1.24187	0.8	1.93	0.257844	0.89908	1.22232	0.86	1.73
POLB	203616_at	0.876179	0.998794	1.02984	0.71	1.49	0.392361	0.799891	1.12416	0.86	1.47	0.602073	0.899957	1.11031	0.75	1.65	0.230343	0.89908	1.18586	0.9	1.57
LONP2	229663_at	0.409278	0.998794	0.762846	0.4	1.45	0.715964	0.919874	0.950504	0.72	1.25	0.560413	0.899957	0.815627	0.41	1.62	0.88749	0.98774	1.0212	0.76	1.37
PARK7	200006_at	0.711048	0.998794	0.844355	0.34	2.07	0.962872	0.980703	1.01224	0.61	1.69	0.897658	0.948568	0.940226	0.37	2.41	0.52114	0.912261	1.18687	0.7	2
AP3M2	203410_at	0.82549	0.998794	1.04186	0.72	1.5	0.0403105	0.756783	1.30301	1.01	1.68	0.528858	0.899957	1.132	0.77	1.67	0.0981909	0.842809	1.25624	0.96	1.65
ALG8	203545_at	0.627899	0.998794	1.22689	0.54	2.8	0.469334	0.850211	1.13913	0.8	1.62	0.363166	0.899957	1.43624	0.66	3.13	0.199136	0.885049	1.26148	0.88	1.8
AK3	224151_s_at	0.182412	0.998794	1.35248	0.87	2.11	0.924225	0.979504	1.01072	0.81	1.26	0.272989	0.899957	1.23765	0.85	1.81	0.905357	0.98774	0.986211	0.78	1.24
RP9P	223945_x_at	0.715597	0.998794	1.08283	0.71	1.66	0.857997	0.969281	0.967556	0.67	1.39	0.333752	0.899957	1.24187	0.8	1.93	0.427455	0.89908	1.1556	0.81	1.65
RRS1	209567_at	0.755571	0.998794	1.09446	0.62	1.93	0.636899	0.893254	1.0662	0.82	1.39	0.649783	0.899957	1.15244	0.62	2.13	0.60982	0.924466	1.07373	0.82	1.41
CLDND1	1554149_at	0.185048	0.998794	1.64208	0.79	3.42	0.0883994	0.756783	1.27482	0.96	1.69	0.566801	0.899957	1.23372	0.6	2.53	0.786581	0.953999	1.0408	0.78	1.39
SEC23A	212887_at	0.257586	0.998794	1.21309	0.87	1.69	0.400124	0.800487	1.12323	0.86	1.47	0.0182023	0.715569	1.48299	1.07	2.06	0.0980171	0.842809	1.27291	0.96	1.69
C1orf109	218712_at	0.0940434	0.998794	0.453229	0.18	1.14	0.74425	0.927677	0.956392	0.73	1.25	0.132726	0.834275	0.469149	0.17	1.26	0.935455	0.98774	1.01137	0.77	1.33
TXLNA	212300_at	0.0349542	0.998794	0.346212	0.13	0.93	0.142439	0.756783	0.735084	0.49	1.11	0.0971011	0.792574	0.40841	0.14	1.18	0.336961	0.89908	0.81075	0.53	1.24
TMEM126A	223334_at	0.418741	0.998794	1.49464	0.56	3.96	0.272497	0.763687	1.23602	0.85	1.8	0.248083	0.899957	1.70365	0.69	4.21	0.143661	0.842809	1.3185	0.91	1.91
COPB2	201098_at	0.88374	0.998794	1.04418	0.58	1.86	0.876807	0.97423	1.0285	0.72	1.47	0.69784	0.901818	0.895143	0.51	1.57	0.418668	0.89908	0.857151	0.59	1.25
ARHGAP5	233849_s_at	0.753947	0.998794	0.928942	0.59	1.47	0.525824	0.876374	0.916636	0.7	1.2	0.329381	0.899957	1.25885	0.79	2	0.807536	0.965532	1.03536	0.78	1.37
GPATCH1	219818_s_at	0.666631	0.998794	0.88829	0.52	1.52	0.961237	0.980703	1.00825	0.72	1.4	0.650355	0.899957	0.876889	0.5	1.55	0.922415	0.98774	1.0172	0.72	1.43
SIAH2	209339_at	0.974798	0.998794	0.99206	0.6	1.63	0.376948	0.789795	1.08826	0.9	1.31	0.459262	0.899957	0.832184	0.51	1.35	0.954614	0.992791	0.994338	0.82	1.21
IFT74	61732_r_at	0.816261	0.998794	0.926271	0.49	1.77	0.338856	0.78385	0.846228	0.6	1.19	0.830937	0.927891	1.07183	0.57	2.03	0.710717	0.94295	0.934166	0.65	1.34
ANKRD27	221522_at	0.522863	0.998794	0.836288	0.48	1.45	0.331695	0.78385	1.13585	0.88	1.47	0.504765	0.899957	0.821407	0.46	1.46	0.454173	0.89908	1.10805	0.85	1.45
STAU1	213037_x_at	0.539716	0.998794	0.792987	0.38	1.66	0.356296	0.78385	0.799025	0.5	1.29	0.663708	0.899957	0.842714	0.39	1.82	0.219258	0.89908	0.737373	0.45	1.2
MED21	209362_at	0.750229	0.998794	1.07184	0.7	1.64	0.0726981	0.756783	1.24591	0.98	1.58	0.858031	0.932182	1.04207	0.66	1.64	0.186995	0.855223	1.17862	0.92	1.5
CCT4	200877_at	0.843008	0.998794	1.10066	0.43	2.84	0.0569992	0.756783	1.39306	0.99	1.96	0.770657	0.917844	0.87921	0.37	2.09	0.158023	0.845909	1.26749	0.91	1.76
YTHDF3	221749_at	0.849639	0.998794	1.05693	0.6	1.87	0.785448	0.936549	0.945714	0.63	1.41	0.83318	0.927891	1.06727	0.58	1.96	0.570954	0.924466	0.887566	0.59	1.34
G2E3	223257_at	0.917018	0.998794	1.0273	0.62	1.71	0.477038	0.850211	1.07165	0.89	1.3	0.177763	0.899957	1.426	0.85	2.39	0.293372	0.89908	1.11064	0.91	1.35
FADD	202535_at	0.255438	0.998794	1.11947	0.92	1.36	0.0219927	0.756783	1.35102	1.04	1.75	0.115	0.834275	1.16377	0.96	1.41	0.00565176	0.528257	1.44809	1.11	1.88
NUBPL	220176_at	0.786995	0.998794	0.939566	0.6	1.48	0.216932	0.756783	1.17775	0.91	1.53	0.336904	0.899957	1.24887	0.79	1.97	0.0156698	0.704337	1.3984	1.07	1.84
AASDHPPT	202169_s_at	0.834314	0.998794	1.13279	0.35	3.64	0.98326	0.99228	1.00415	0.68	1.48	0.399155	0.899957	1.66855	0.51	5.49	0.81168	0.967857	1.04688	0.72	1.53
AK3	224655_at	0.182412	0.998794	1.35248	0.87	2.11	0.779141	0.936549	1.04695	0.76	1.44	0.272989	0.899957	1.23765	0.85	1.81	0.634846	0.931107	1.08227	0.78	1.5
MED21	209363_s_at	0.750229	0.998794	1.07184	0.7	1.64	0.0685458	0.756783	1.21977	0.99	1.51	0.858031	0.932182	1.04207	0.66	1.64	0.185362	0.855223	1.16107	0.93	1.45
ABCC5	226363_at	0.708452	0.998794	1.04462	0.83	1.31	0.513082	0.86217	1.04113	0.92	1.17	0.600461	0.899957	0.930413	0.71	1.22	0.576018	0.924466	0.96467	0.85	1.09
PDCD10	210907_s_at	0.597489	0.998794	1.09149	0.79	1.51	0.118784	0.756783	1.21484	0.95	1.55	0.456909	0.899957	0.880557	0.63	1.23	0.42032	0.89908	1.10722	0.86	1.42
MDM1	213761_at	0.154105	0.998794	1.21082	0.93	1.58	0.821397	0.957189	0.973949	0.77	1.22	0.345251	0.899957	1.13138	0.88	1.46	0.279636	0.89908	0.885935	0.71	1.1
TIMMDC1	223004_s_at	0.957601	0.998794	1.01958	0.5	2.08	0.150908	0.756783	1.25041	0.92	1.7	0.79896	0.927891	0.913197	0.45	1.84	0.587874	0.924466	1.08642	0.81	1.47
RAB3IP	228432_at	0.459243	0.998794	1.10733	0.85	1.45	0.0375798	0.756783	1.43448	1.02	2.02	0.651809	0.899957	1.06117	0.82	1.37	0.0653787	0.842809	1.36516	0.98	1.9
PIGO	214991_s_at	0.401125	0.998794	1.16996	0.81	1.69	0.237709	0.756783	1.23125	0.87	1.74	0.535776	0.899957	1.11306	0.79	1.56	0.372741	0.89908	1.16489	0.83	1.63
SRP72	208801_at	0.0140961	0.886038	0.288477	0.11	0.78	0.254707	0.756783	0.793281	0.53	1.18	0.0149668	0.715569	0.276759	0.1	0.78	0.451945	0.89908	0.85354	0.56	1.29
PLD1	226636_at	0.687999	0.998794	1.06563	0.78	1.45	0.890491	0.97603	1.01091	0.87	1.18	0.509003	0.899957	0.894837	0.64	1.24	0.433263	0.89908	0.938849	0.8	1.1
DLAT	213149_at	0.998794	0.998794	1.00086	0.33	3.03	0.153542	0.756783	1.25882	0.92	1.73	0.543234	0.899957	1.41259	0.46	4.3	0.0443059	0.812275	1.41142	1.01	1.97
PYROXD1	213878_at	0.800717	0.998794	1.05368	0.7	1.58	0.65979	0.893254	0.943744	0.73	1.22	0.919469	0.95061	1.02239	0.67	1.57	0.393732	0.89908	0.888964	0.68	1.17
MEAF6	230293_at	0.0940434	0.998794	0.453229	0.18	1.14	0.446241	0.842686	0.834665	0.52	1.33	0.132726	0.834275	0.469149	0.17	1.26	0.7292	0.94295	0.919796	0.57	1.48
LPAR2	206723_s_at	0.391928	0.998794	0.718703	0.34	1.53	0.430523	0.822213	0.871451	0.62	1.23	0.388884	0.899957	0.697614	0.31	1.58	0.443594	0.89908	0.867826	0.6	1.25
CHD7	218829_s_at	0.759428	0.998794	1.09303	0.62	1.93	0.611602	0.893254	1.05536	0.86	1.3	0.725596	0.904426	1.1136	0.61	2.03	0.381528	0.89908	1.10016	0.89	1.36
BMPR2	238516_at	0.701952	0.998794	1.14419	0.57	2.28	0.127495	0.756783	1.29577	0.93	1.81	0.680382	0.899957	1.16461	0.56	2.4	0.137898	0.842809	1.30747	0.92	1.86
ARMC1	218185_s_at	0.619125	0.998794	1.18092	0.61	2.27	0.194252	0.756783	1.24556	0.89	1.74	0.662637	0.899957	1.16577	0.59	2.32	0.293869	0.89908	1.20166	0.85	1.69
ZNF319	228460_at	0.318215	0.998794	0.690493	0.33	1.43	0.311029	0.77952	0.841854	0.6	1.17	0.514461	0.899957	0.780544	0.37	1.64	0.388062	0.89908	0.863166	0.62	1.21
SLC25A36	201919_at	0.880108	0.998794	1.04529	0.59	1.86	0.926076	0.979504	1.01519	0.74	1.4	0.635465	0.899957	0.873333	0.5	1.53	0.374105	0.89908	0.86314	0.62	1.19
G2E3	223258_s_at	0.917018	0.998794	1.0273	0.62	1.71	0.47582	0.850211	1.07245	0.88	1.3	0.177763	0.899957	1.426	0.85	2.39	0.321722	0.89908	1.10681	0.91	1.35
ASUN	221652_s_at	0.733062	0.998794	1.07675	0.7	1.65	0.0605539	0.756783	1.25431	0.99	1.59	0.849864	0.927891	1.04449	0.67	1.64	0.113309	0.842809	1.21901	0.95	1.56
PRMT5	1564520_s_at	0.922925	0.998794	0.963	0.45	2.07	0.433531	0.822213	1.11707	0.85	1.47	0.250114	0.899957	1.57954	0.72	3.44	0.0807152	0.842809	1.3073	0.97	1.77
PPFIBP1	1569464_at	0.732076	0.998794	1.07687	0.7	1.65	0.612915	0.893254	1.07288	0.82	1.41	0.808283	0.927891	1.05629	0.68	1.64	0.734637	0.94295	1.04971	0.79	1.39
DLAT	212568_s_at	0.998794	0.998794	1.00086	0.33	3.03	0.195462	0.756783	1.22665	0.9	1.67	0.543234	0.899957	1.41259	0.46	4.3	0.0251213	0.704337	1.45336	1.05	2.02
CREB3	209432_s_at	0.529874	0.998794	1.16308	0.73	1.86	0.639222	0.893254	1.09572	0.75	1.61	0.495088	0.899957	1.15645	0.76	1.76	0.472723	0.908288	1.14204	0.79	1.64
SS18	216684_s_at	0.761032	0.998794	1.09189	0.62	1.92	0.23946	0.756783	1.14977	0.91	1.45	0.685349	0.899957	1.12845	0.63	2.02	0.250799	0.89908	1.15249	0.9	1.47
LINC00667	215283_at	0.248308	0.998794	0.65084	0.31	1.35	0.0732656	0.756783	0.759253	0.56	1.03	0.46654	0.899957	0.751357	0.35	1.62	0.0501115	0.814507	0.719592	0.52	1
TIMM50	224913_s_at	0.786008	0.998794	0.937649	0.59	1.49	0.234819	0.756783	1.16098	0.91	1.49	0.409031	0.899957	0.820681	0.51	1.31	0.54353	0.91982	1.0796	0.84	1.38
GNL2	201948_at	0.0940434	0.998794	0.453229	0.18	1.14	0.88858	0.97603	0.978234	0.72	1.33	0.132726	0.834275	0.469149	0.17	1.26	0.679711	0.94295	1.06625	0.79	1.45
PNO1	242905_at	0.916617	0.998794	0.942267	0.31	2.87	0.279533	0.771727	1.13251	0.9	1.42	0.44059	0.899957	0.658528	0.23	1.9	0.745756	0.94295	1.03798	0.83	1.3
FKBP3	218003_s_at	0.361857	0.998794	1.44314	0.66	3.17	0.478206	0.850211	1.11686	0.82	1.52	0.0580866	0.792574	2.14853	0.97	4.74	0.15673	0.845909	1.26412	0.91	1.75
ETNK1	224454_at	0.800945	0.998794	1.05775	0.68	1.64	0.158357	0.756783	1.166	0.94	1.44	0.904118	0.948568	1.02873	0.65	1.63	0.179151	0.847598	1.16341	0.93	1.45
PAPOLG	222839_s_at	0.851407	0.998794	1.10857	0.38	3.26	0.738373	0.922967	1.06491	0.74	1.54	0.675926	0.899957	0.809837	0.3	2.18	0.877478	0.98774	1.0278	0.73	1.46
IFT74	219174_at	0.816261	0.998794	0.926271	0.49	1.77	0.349646	0.78385	0.903357	0.73	1.12	0.830937	0.927891	1.07183	0.57	2.03	0.682373	0.94295	0.953487	0.76	1.2
N4BP1	204601_at	0.396967	0.998794	0.74991	0.39	1.46	0.680092	0.908911	1.06957	0.78	1.47	0.615717	0.899957	0.838192	0.42	1.67	0.517607	0.912261	1.1111	0.81	1.53
FBXO25	225591_at	0.733492	0.998794	1.10623	0.62	1.98	0.847174	0.968198	1.02858	0.77	1.37	0.674334	0.899957	1.14455	0.61	2.15	0.976288	0.997798	0.995476	0.74	1.34
COMMD1	226024_at	0.843008	0.998794	1.10066	0.43	2.84	0.829308	0.957325	0.945041	0.57	1.58	0.770657	0.917844	0.87921	0.37	2.09	0.524524	0.912261	1.16527	0.73	1.87
ZBTB5	203026_at	0.334439	0.998794	1.3664	0.72	2.58	0.600113	0.893254	1.09592	0.78	1.54	0.228872	0.899957	1.43844	0.8	2.6	0.586498	0.924466	1.09792	0.78	1.54
SS18	209954_x_at	0.761032	0.998794	1.09189	0.62	1.92	0.39441	0.799891	1.13037	0.85	1.5	0.685349	0.899957	1.12845	0.63	2.02	0.353954	0.89908	1.14788	0.86	1.54
PRPF4B	202126_at	0.714268	0.998794	1.14006	0.57	2.3	0.548062	0.881148	1.12164	0.77	1.63	0.395445	0.899957	1.36957	0.66	2.83	0.687129	0.94295	1.08383	0.73	1.6
C8orf33	218187_s_at	0.494929	0.998794	1.2075	0.7	2.08	0.235764	0.756783	1.15874	0.91	1.48	0.503997	0.899957	1.21362	0.69	2.14	0.328935	0.89908	1.13547	0.88	1.47
CLOCK	227531_at	0.00543998	0.653569	0.234472	0.08	0.65	0.160458	0.756783	0.793173	0.57	1.1	0.00651105	0.715569	0.232235	0.08	0.66	0.354018	0.89908	0.8557	0.62	1.19
PSMG2	218467_at	0.422258	0.998794	0.736492	0.35	1.55	0.542832	0.878111	0.873301	0.56	1.35	0.598476	0.899957	0.804416	0.36	1.81	0.850011	0.98774	1.04443	0.67	1.64
NOD2	220066_at	0.392305	0.998794	0.749208	0.39	1.45	0.400244	0.800487	0.902335	0.71	1.15	0.420409	0.899957	0.766383	0.4	1.46	0.509329	0.912261	0.924694	0.73	1.17
EXO5	222902_s_at	0.0533793	0.998794	0.38739	0.15	1.01	0.308503	0.77952	0.817931	0.56	1.2	0.0651624	0.792574	0.382654	0.14	1.06	0.664165	0.935343	0.917342	0.62	1.35
TWF1	201745_at	0.457097	0.998794	0.740603	0.34	1.63	0.368864	0.784058	1.14864	0.85	1.55	0.456564	0.899957	0.736209	0.33	1.65	0.616354	0.924466	1.08088	0.8	1.47
ATP5L	210453_x_at	0.532354	0.998794	1.4068	0.48	4.11	0.778835	0.936549	0.929415	0.56	1.55	0.193678	0.899957	2.04003	0.7	5.98	0.911004	0.98774	1.03124	0.6	1.77
CAND1	235224_s_at	0.310656	0.998794	1.15431	0.87	1.52	0.368489	0.784058	1.11923	0.88	1.43	0.469299	0.899957	1.10594	0.84	1.45	0.626243	0.926648	1.06362	0.83	1.36
C2orf69	227973_at	0.848835	0.998794	1.06934	0.54	2.13	0.078398	0.756783	1.28191	0.97	1.69	0.928627	0.95061	1.03407	0.5	2.15	0.118903	0.842809	1.24681	0.94	1.65
EED	209572_s_at	0.50236	0.998794	1.40312	0.52	3.77	0.539968	0.878111	1.1225	0.78	1.62	0.292376	0.899957	1.639	0.65	4.11	0.379434	0.89908	1.1834	0.81	1.72
UQCRFS1	208909_at	0.734759	0.998794	0.907789	0.52	1.59	0.315007	0.77952	1.16957	0.86	1.59	0.943288	0.960756	1.02126	0.57	1.82	0.4388	0.89908	1.13651	0.82	1.57
WDR20	227693_at	0.836869	0.998794	0.92603	0.45	1.92	0.726811	0.919874	0.946177	0.69	1.29	0.715	0.901818	1.15207	0.54	2.46	0.892781	0.98774	1.02196	0.75	1.4
C3orf17	225281_at	0.753681	0.998794	1.12347	0.54	2.32	0.185845	0.756783	1.22756	0.91	1.66	0.811697	0.927891	0.917237	0.45	1.87	0.522218	0.912261	1.10786	0.81	1.52
FXR1	230201_at	0.464483	0.998794	1.08087	0.88	1.33	0.349619	0.78385	1.0755	0.92	1.25	0.869279	0.937458	0.980666	0.78	1.24	0.928005	0.98774	1.00736	0.86	1.18
NDUFS5	201757_at	0.0476191	0.998794	0.366794	0.14	0.99	0.671419	0.90621	0.923344	0.64	1.33	0.0703289	0.792574	0.375285	0.13	1.08	0.95783	0.992791	1.01029	0.69	1.48
RBFA	219419_at	0.722082	0.998794	1.11868	0.6	2.08	0.685788	0.908911	0.917084	0.6	1.39	0.530969	0.899957	1.24175	0.63	2.44	0.949565	0.992791	1.01385	0.66	1.55
METTL1	204027_s_at	0.536153	0.998794	1.16875	0.71	1.92	0.249495	0.756783	1.21856	0.87	1.71	0.302777	0.899957	1.31539	0.78	2.22	0.149433	0.845909	1.30075	0.91	1.86
TBL1XR1	223013_at	0.576324	0.998794	1.07982	0.82	1.41	0.48271	0.850211	1.10624	0.83	1.47	0.629234	0.899957	0.930033	0.69	1.25	0.777136	0.953999	1.04253	0.78	1.39
RSRC1	1555501_s_at	0.901286	0.998794	0.969633	0.6	1.58	0.302631	0.77952	1.09039	0.92	1.29	0.513653	0.899957	0.851662	0.53	1.38	0.557085	0.924379	1.05108	0.89	1.24
FOXJ3	206015_s_at	0.0549139	0.998794	0.344435	0.12	1.02	0.275867	0.768237	0.803386	0.54	1.19	0.0743857	0.792574	0.342427	0.11	1.11	0.754904	0.946318	0.937145	0.62	1.41
ZNF691	232780_s_at	0.0712009	0.998794	0.373533	0.13	1.09	0.208955	0.756783	0.771021	0.51	1.16	0.102156	0.817248	0.381399	0.12	1.21	0.670987	0.940237	0.914779	0.61	1.38
VPS72	202261_at	0.190913	0.998794	1.41348	0.84	2.37	0.283799	0.775599	1.184	0.87	1.61	0.201066	0.899957	1.40665	0.83	2.37	0.313548	0.89908	1.17107	0.86	1.59
G2E3	223256_at	0.917018	0.998794	1.0273	0.62	1.71	0.353775	0.78385	1.1239	0.88	1.44	0.177763	0.899957	1.426	0.85	2.39	0.137472	0.842809	1.21174	0.94	1.56
C1orf50	219406_at	0.108436	0.998794	0.439297	0.16	1.2	0.541298	0.878111	0.887291	0.6	1.3	0.195448	0.899957	0.495826	0.17	1.43	0.724618	0.94295	1.07357	0.72	1.59
KRAS	214352_s_at	0.469645	0.998794	1.09451	0.86	1.4	0.0517901	0.756783	1.23142	1	1.52	0.324347	0.899957	1.1436	0.88	1.49	0.0950713	0.842809	1.21178	0.97	1.52
TRMT10C	223267_at	0.885819	0.998794	0.955657	0.51	1.77	0.111705	0.756783	1.22551	0.95	1.57	0.711722	0.901818	0.886004	0.47	1.68	0.399531	0.89908	1.12191	0.86	1.47
ACTR10	222230_s_at	0.114104	0.998794	1.84217	0.86	3.93	0.504358	0.86217	1.14698	0.77	1.72	0.0128148	0.715569	2.62751	1.23	5.62	0.148663	0.845909	1.36379	0.9	2.08
MIPOL1	1552573_s_at	0.881419	0.998794	1.0178	0.81	1.28	0.109212	0.756783	1.20622	0.96	1.52	0.284002	0.899957	1.13415	0.9	1.43	0.00600275	0.528257	1.42061	1.11	1.82
PPFIA1	210236_at	0.255438	0.998794	1.11947	0.92	1.36	0.0655419	0.756783	1.17798	0.99	1.4	0.115	0.834275	1.16377	0.96	1.41	0.0536834	0.814507	1.19967	1	1.44
ZNF639	222624_s_at	0.560838	0.998794	1.07802	0.84	1.39	0.192392	0.756783	1.12106	0.94	1.33	0.78914	0.927891	0.962124	0.72	1.28	0.721108	0.94295	1.03328	0.86	1.24
DCAF13	231784_s_at	0.23404	0.998794	1.422	0.8	2.54	0.472024	0.850211	1.08806	0.86	1.37	0.175098	0.899957	1.50846	0.83	2.73	0.432751	0.89908	1.09998	0.87	1.4
SETDB1	203155_at	0.190913	0.998794	1.41348	0.84	2.37	0.699321	0.908911	1.07492	0.75	1.55	0.201066	0.899957	1.40665	0.83	2.37	0.651203	0.935343	1.08655	0.76	1.56
EIF3K	212716_s_at	0.539605	0.998794	0.85886	0.53	1.4	0.318582	0.77952	1.18742	0.85	1.66	0.297609	0.899957	0.770844	0.47	1.26	0.641068	0.934928	1.08145	0.78	1.5
PRMT5	1564521_x_at	0.922925	0.998794	0.963	0.45	2.07	0.494554	0.860094	1.12783	0.8	1.59	0.250114	0.899957	1.57954	0.72	3.44	0.100497	0.842809	1.36582	0.94	1.98
EGFR	210984_x_at	0.687207	0.998794	1.05018	0.83	1.33	0.933306	0.980703	1.00996	0.8	1.27	0.640766	0.899957	1.05771	0.84	1.34	0.938464	0.987857	1.00908	0.8	1.27
USP47	223117_s_at	0.897341	0.998794	1.06685	0.4	2.85	0.54168	0.878111	0.889376	0.61	1.3	0.563273	0.899957	1.3409	0.5	3.63	0.797575	0.958833	0.950359	0.64	1.4
ASTE1	221135_s_at	0.930105	0.998794	0.969282	0.48	1.95	0.869878	0.971438	0.971505	0.69	1.37	0.767014	0.917844	0.902484	0.46	1.78	0.305944	0.89908	0.836546	0.59	1.18
TFDP2	203588_s_at	0.563821	0.998794	0.835856	0.45	1.54	0.723799	0.919874	0.963121	0.78	1.19	0.26878	0.899957	0.716743	0.4	1.29	0.331729	0.89908	0.901474	0.73	1.11
FGFR1OP2	243619_at	0.733062	0.998794	1.07675	0.7	1.65	0.610358	0.893254	0.907484	0.62	1.32	0.849864	0.927891	1.04449	0.67	1.64	0.44208	0.89908	0.860711	0.59	1.26
ABCC5	209380_s_at	0.708452	0.998794	1.04462	0.83	1.31	0.304487	0.77952	1.07216	0.94	1.22	0.600461	0.899957	0.930413	0.71	1.22	0.89015	0.98774	0.990535	0.87	1.13
TM2D2	224413_s_at	0.952174	0.998794	1.01211	0.68	1.5	0.887065	0.97603	1.02156	0.76	1.37	0.824264	0.927891	1.04572	0.7	1.55	0.890501	0.98774	1.02114	0.76	1.38
TIMM50	217612_at	0.786008	0.998794	0.937649	0.59	1.49	0.232838	0.756783	1.19613	0.89	1.61	0.409031	0.899957	0.820681	0.51	1.31	0.521318	0.912261	1.10371	0.82	1.49
USP14	226567_at	0.964086	0.998794	0.985267	0.52	1.88	0.803279	0.946034	0.959855	0.7	1.32	0.644398	0.899957	1.17633	0.59	2.34	0.496951	0.912261	0.889373	0.63	1.25
NFYC	211797_s_at	0.068229	0.998794	0.410241	0.16	1.07	0.3096	0.77952	0.821229	0.56	1.2	0.0700616	0.792574	0.387588	0.14	1.08	0.160887	0.845909	0.754224	0.51	1.12
VCPIP1	234988_at	0.605353	0.998794	1.15815	0.66	2.02	0.515342	0.86217	0.894318	0.64	1.25	0.46599	0.899957	1.24912	0.69	2.27	0.761565	0.947055	0.947277	0.67	1.34
AP4S1	210277_at	0.831468	0.998794	1.05493	0.64	1.73	0.804129	0.946034	1.03206	0.8	1.32	0.139926	0.843391	1.45996	0.88	2.41	0.299381	0.89908	1.149	0.88	1.49
RB1CC1	202034_x_at	0.455307	0.998794	1.23023	0.71	2.12	0.651088	0.893254	1.06556	0.81	1.4	0.432494	0.899957	1.25759	0.71	2.23	0.654215	0.935343	0.936227	0.7	1.25
UBE2M	203109_at	0.338151	0.998794	0.742432	0.4	1.37	0.960121	0.980703	1.00562	0.81	1.25	0.0928604	0.792574	0.597165	0.33	1.09	0.553313	0.924379	0.937015	0.76	1.16
RNF38	222660_s_at	0.375071	0.998794	1.2261	0.78	1.92	0.126926	0.756783	1.23726	0.94	1.63	0.328289	0.899957	1.21941	0.82	1.82	0.0831985	0.842809	1.26995	0.97	1.66
ATP1B3	208836_at	0.705742	0.998794	0.890798	0.49	1.62	0.45706	0.850211	1.0636	0.9	1.25	0.351475	0.899957	0.758085	0.42	1.36	0.806049	0.965532	0.979641	0.83	1.15
LETM2	1557415_s_at	0.905612	0.998794	0.982472	0.73	1.32	0.639902	0.893254	1.06335	0.82	1.38	0.898767	0.948568	0.981183	0.73	1.31	0.848527	0.98774	1.02668	0.78	1.35
DTNBP1	223445_at	0.725623	0.998794	0.835896	0.31	2.27	0.147832	0.756783	0.763887	0.53	1.1	0.872233	0.938344	0.918229	0.32	2.6	0.247325	0.89908	0.802886	0.55	1.16
PLD1	205203_at	0.687999	0.998794	1.06563	0.78	1.45	0.427501	0.8214	1.08128	0.89	1.31	0.509003	0.899957	0.894837	0.64	1.24	0.782036	0.953999	1.02872	0.84	1.26
AGPS	225114_at	0.416838	0.998794	0.725268	0.33	1.57	0.937044	0.980703	0.989756	0.77	1.28	0.551465	0.899957	0.778971	0.34	1.77	0.554119	0.924379	1.08357	0.83	1.41
PPIE	202494_at	0.0644581	0.998794	0.400187	0.15	1.06	0.79181	0.936549	0.955209	0.68	1.34	0.0950613	0.792574	0.412669	0.15	1.17	0.720549	0.94295	0.937976	0.66	1.33
LRRC58	225479_at	0.955437	0.998794	1.02044	0.5	2.08	0.252229	0.756783	1.18364	0.89	1.58	0.793735	0.927891	0.911381	0.45	1.83	0.747501	0.94295	1.04828	0.79	1.4
ORC2	235423_at	0.698785	0.998794	1.14634	0.57	2.29	0.571923	0.886468	1.10638	0.78	1.57	0.65136	0.899957	1.18123	0.57	2.43	0.990362	0.997798	1.00223	0.7	1.44
KPNA4	225267_at	0.86129	0.998794	1.04377	0.65	1.69	0.0876428	0.756783	1.24079	0.97	1.59	0.744273	0.908457	0.924386	0.58	1.48	0.174339	0.847598	1.19088	0.93	1.53
PPP4R2	225519_at	0.389743	0.998794	1.37718	0.66	2.86	0.0222398	0.756783	1.46398	1.06	2.03	0.486038	0.899957	1.27853	0.64	2.55	0.00373898	0.528257	1.58434	1.16	2.16
DHX36	223140_s_at	0.938286	0.998794	1.01944	0.63	1.66	0.256075	0.756783	1.16612	0.89	1.52	0.592613	0.899957	0.877808	0.54	1.41	0.738651	0.94295	1.04825	0.79	1.38
FOXA1	204667_at	0.824435	0.998794	1.02624	0.82	1.29	0.616799	0.893254	1.03182	0.91	1.17	0.245825	0.899957	1.14414	0.91	1.44	0.0894209	0.842809	1.12218	0.98	1.28
FAM98C	227951_s_at	0.733204	0.998794	0.918651	0.56	1.5	0.894347	0.97603	0.978972	0.72	1.34	0.365779	0.899957	0.797299	0.49	1.3	0.292741	0.89908	0.841027	0.61	1.16
TMEM237	1553956_at	0.894071	0.998794	1.05021	0.51	2.16	0.224183	0.756783	1.14607	0.92	1.43	0.836372	0.927891	1.08248	0.51	2.3	0.331661	0.89908	1.11628	0.89	1.39
SLC25A21	220474_at	0.738326	0.998794	1.03708	0.84	1.28	0.557335	0.882215	1.03744	0.92	1.17	0.232744	0.899957	1.13752	0.92	1.41	0.203735	0.896433	1.08506	0.96	1.23
NSMCE2	226536_at	0.854855	0.998794	1.04503	0.65	1.68	0.468147	0.850211	1.11749	0.83	1.51	0.664759	0.899957	1.11366	0.68	1.81	0.274759	0.89908	1.18891	0.87	1.62
ECH1	200789_at	0.567027	0.998794	0.868257	0.54	1.41	0.590516	0.892553	1.08964	0.8	1.49	0.313394	0.899957	0.778208	0.48	1.27	0.888333	0.98774	0.976472	0.7	1.36
UTP23	227402_s_at	0.423838	0.998794	1.25365	0.72	2.18	0.448719	0.843746	1.13384	0.82	1.57	0.509318	0.899957	1.20947	0.69	2.13	0.852451	0.98774	1.03277	0.74	1.45
R3HDM2	203831_at	0.575934	0.998794	0.818394	0.41	1.65	0.788904	0.936549	1.06631	0.67	1.71	0.771823	0.917844	0.895873	0.43	1.88	0.733043	0.94295	1.08834	0.67	1.77
UTP11L	218235_s_at	0.0993232	0.998794	0.461997	0.18	1.16	0.695827	0.908911	1.07702	0.74	1.56	0.141853	0.843448	0.480598	0.18	1.28	0.302296	0.89908	1.2297	0.83	1.82
UMPS	202706_s_at	0.96826	0.998794	1.01495	0.49	2.11	0.168912	0.756783	1.19849	0.93	1.55	0.721322	0.901818	0.877905	0.43	1.8	0.873978	0.98774	1.02157	0.78	1.33
PCMT1	208857_s_at	0.752869	0.998794	0.840129	0.28	2.48	0.548715	0.881148	1.11144	0.79	1.57	0.935925	0.955469	0.956703	0.33	2.81	0.446592	0.89908	1.14555	0.81	1.63
ZNF639	222623_s_at	0.560838	0.998794	1.07802	0.84	1.39	0.157797	0.756783	1.14678	0.95	1.39	0.78914	0.927891	0.962124	0.72	1.28	0.595498	0.924466	1.05493	0.87	1.29
HECTD1	1557100_s_at	0.831468	0.998794	1.05493	0.64	1.73	0.64699	0.893254	1.04713	0.86	1.28	0.139926	0.843391	1.45996	0.88	2.41	0.48626	0.912261	1.07528	0.88	1.32
TBP	203135_at	0.588643	0.998794	0.758097	0.28	2.07	0.710339	0.916567	1.08331	0.71	1.65	0.991754	0.996282	1.00544	0.36	2.81	0.927687	0.98774	0.980655	0.64	1.5
CYCS	244546_at	0.44995	0.998794	1.22146	0.73	2.05	0.722149	0.919874	1.03263	0.87	1.23	0.561456	0.899957	1.15167	0.72	1.85	0.650961	0.935343	0.960843	0.81	1.14
ERICH1	227017_at	0.77488	0.998794	1.0944	0.59	2.03	0.214022	0.756783	1.18438	0.91	1.55	0.715687	0.901818	1.13324	0.58	2.22	0.316749	0.89908	1.14732	0.88	1.5
EIF3K	210501_x_at	0.539605	0.998794	0.85886	0.53	1.4	0.478087	0.850211	1.11896	0.82	1.53	0.297609	0.899957	0.770844	0.47	1.26	0.891977	0.98774	1.02123	0.75	1.38
DDX27	215693_x_at	0.539716	0.998794	0.792987	0.38	1.66	0.555873	0.882215	0.88112	0.58	1.34	0.663708	0.899957	0.842714	0.39	1.82	0.459757	0.89908	0.849992	0.55	1.31
ATP5L	208746_x_at	0.532354	0.998794	1.4068	0.48	4.11	0.91929	0.979504	0.973842	0.58	1.63	0.193678	0.899957	2.04003	0.7	5.98	0.783966	0.953999	1.07788	0.63	1.84
MFN1	207098_s_at	0.560838	0.998794	1.07802	0.84	1.39	0.136488	0.756783	1.15765	0.95	1.4	0.78914	0.927891	0.962124	0.72	1.28	0.322594	0.89908	1.10512	0.91	1.35
MRPL9	209609_s_at	0.154218	0.998794	1.47989	0.86	2.54	0.0116538	0.748984	1.57208	1.11	2.23	0.242056	0.899957	1.38657	0.8	2.4	0.00600292	0.528257	1.64803	1.15	2.35
PRUNE	209586_s_at	0.190913	0.998794	1.41348	0.84	2.37	0.579618	0.888613	1.09627	0.79	1.52	0.201066	0.899957	1.40665	0.83	2.37	0.726885	0.94295	1.06096	0.76	1.48
NFYC	202216_x_at	0.068229	0.998794	0.410241	0.16	1.07	0.12686	0.756783	0.683721	0.42	1.11	0.0700616	0.792574	0.387588	0.14	1.08	0.119077	0.842809	0.673122	0.41	1.11
CYCS	229415_at	0.44995	0.998794	1.22146	0.73	2.05	0.791378	0.936549	1.03643	0.8	1.35	0.561456	0.899957	1.15167	0.72	1.85	0.651623	0.935343	0.939617	0.72	1.23
C2CD5	212943_at	0.791415	0.998794	1.06043	0.69	1.64	0.787801	0.936549	0.958789	0.71	1.3	0.833808	0.927891	1.0498	0.67	1.65	0.521597	0.912261	0.901457	0.66	1.24
KLHL42	225732_at	0.759043	0.998794	1.06912	0.7	1.64	0.410572	0.808009	1.11243	0.86	1.43	0.824848	0.927891	1.05145	0.67	1.64	0.836432	0.984038	0.971837	0.74	1.27
AP3M2	1569053_at	0.82549	0.998794	1.04186	0.72	1.5	0.31248	0.77952	1.18096	0.86	1.63	0.528858	0.899957	1.132	0.77	1.67	0.410793	0.89908	1.14976	0.82	1.6
NOL9	1554082_a_at	0.434061	0.998794	0.71297	0.31	1.66	0.155436	0.756783	1.26745	0.91	1.76	0.51735	0.899957	0.735118	0.29	1.87	0.0363612	0.761854	1.45319	1.02	2.06
PHC3	1552644_a_at	0.3875	0.998794	1.15701	0.83	1.61	0.591427	0.892553	1.05201	0.87	1.27	0.700223	0.901818	0.933831	0.66	1.32	0.870461	0.98774	0.984315	0.81	1.19
GMFB	202544_at	0.0817585	0.998794	1.95407	0.92	4.15	0.381021	0.794545	1.20238	0.8	1.82	0.00958501	0.715569	2.74755	1.28	5.9	0.143125	0.842809	1.38442	0.9	2.14
USP14	201672_s_at	0.964086	0.998794	0.985267	0.52	1.88	0.653405	0.893254	1.08024	0.77	1.51	0.644398	0.899957	1.17633	0.59	2.34	0.520453	0.912261	1.12352	0.79	1.6
ABCC5	1558460_at	0.708452	0.998794	1.04462	0.83	1.31	0.288727	0.77952	1.14009	0.89	1.45	0.600461	0.899957	0.930413	0.71	1.22	0.661475	0.935343	1.05919	0.82	1.37
C1D	200056_s_at	0.916617	0.998794	0.942267	0.31	2.87	0.822312	0.957189	1.04145	0.73	1.48	0.44059	0.899957	0.658528	0.23	1.9	0.830178	0.984038	0.961738	0.67	1.37
DDX27	221780_s_at	0.539716	0.998794	0.792987	0.38	1.66	0.631239	0.893254	0.910629	0.62	1.33	0.663708	0.899957	0.842714	0.39	1.82	0.684128	0.94295	0.920301	0.62	1.37
PHF3	217952_x_at	0.028546	0.998794	2.64597	1.11	6.32	0.650481	0.893254	1.11774	0.69	1.81	0.0211418	0.715569	2.84709	1.17	6.93	0.6148	0.924466	1.12867	0.7	1.81
ZNF24	212534_at	0.823179	0.998794	0.927163	0.48	1.8	0.342954	0.78385	0.840283	0.59	1.2	0.978268	0.989512	0.989961	0.48	2.05	0.603537	0.924466	0.905045	0.62	1.32
MRPL18	217907_at	0.280664	0.998794	0.563934	0.2	1.6	0.975448	0.98666	0.99399	0.68	1.46	0.396048	0.899957	0.631694	0.22	1.82	0.78562	0.953999	0.946928	0.64	1.4
GRHPR	201347_x_at	0.334439	0.998794	1.3664	0.72	2.58	0.237659	0.756783	1.25288	0.86	1.82	0.228872	0.899957	1.43844	0.8	2.6	0.17673	0.847598	1.28233	0.89	1.84
FAM96B	218074_at	0.232163	0.998794	0.620704	0.28	1.36	0.40409	0.804523	0.85915	0.6	1.23	0.216126	0.899957	0.602923	0.27	1.34	0.217017	0.89908	0.782874	0.53	1.15
GRHPR	214864_s_at	0.334439	0.998794	1.3664	0.72	2.58	0.133422	0.756783	1.33973	0.91	1.96	0.228872	0.899957	1.43844	0.8	2.6	0.0653203	0.842809	1.41276	0.98	2.04
MRPL15	218027_at	0.549959	0.998794	1.21167	0.65	2.27	0.101792	0.756783	1.26272	0.95	1.67	0.496288	0.899957	1.25802	0.65	2.44	0.132931	0.842809	1.24845	0.93	1.67
PSMB1	214288_s_at	0.588643	0.998794	0.758097	0.28	2.07	0.791601	0.936549	0.938073	0.58	1.51	0.991754	0.996282	1.00544	0.36	2.81	0.791755	0.957067	0.939841	0.59	1.49

## Sheet: S7B adenocarcinoma
Suppl. Table 7B: Cox regression model for gene copy number and gene expression in the total NSCLC cohort (n=105) for the 383 high correlation probe sets. In the multivariate in Cox regression model the gene copy number and gene expression are adjusted for the variables age (< 70 versus ≥ 70 years), patient performance status (0 versus I-III) and tumor stage (I versus II-IV). The p-values were adj…
		CN (univariat)					GE (univariat)					CN (multivariat)					GE (multivariat)
genesymbol	probe set	p-value	adj p-value	HR	CI lower	CI upper	p-value	adj p-value	HR	CI lower	CI upper	p-value	adj p-value	HR	CI lower	CI upper	p-value	adj p-value	HR	CI lower	CI upper
SRP54	203605_at	0.51762	0.921233	1.13623	0.77	1.67	0.848542	0.973269	1.03184	0.75	1.42	0.0282733	0.394075	1.48888	1.04	2.12	0.114709	0.448301	1.31233	0.94	1.84
KIAA0391	202713_s_at	0.863634	0.957894	1.03518	0.7	1.54	0.84416	0.973269	1.0327	0.75	1.42	0.185775	0.649422	1.29351	0.88	1.89	0.143769	0.492942	1.28217	0.92	1.79
NXT1	218708_at	0.884703	0.96536	1.02142	0.77	1.36	0.90653	0.986796	1.02065	0.73	1.44	0.768234	0.905289	1.04299	0.79	1.38	0.792661	0.901463	1.0468	0.74	1.47
MDM1	220397_at	0.515574	0.921233	1.13029	0.78	1.64	0.0205797	0.349641	1.30264	1.04	1.63	0.795511	0.905289	1.04829	0.73	1.5	0.0343005	0.241393	1.25571	1.02	1.55
EAPP	202623_at	0.569638	0.921233	1.12184	0.75	1.67	0.792663	0.973269	0.950062	0.65	1.39	0.0403284	0.394075	1.46449	1.02	2.11	0.368896	0.704073	1.20361	0.8	1.8
NAPB	225111_s_at	0.918819	0.970495	1.01529	0.76	1.36	0.379027	0.872125	1.13196	0.86	1.49	0.786615	0.905289	1.03985	0.78	1.38	0.207689	0.587929	1.1874	0.91	1.55
GEMIN2	211115_x_at	0.152959	0.921233	1.31665	0.9	1.92	0.10858	0.630092	1.2768	0.95	1.72	0.0125593	0.394075	1.60664	1.11	2.33	0.00479311	0.0876774	1.57613	1.15	2.16
FGFR1OP2	223262_s_at	0.796157	0.921233	0.927154	0.52	1.65	0.402494	0.888721	0.798226	0.47	1.35	0.699204	0.905289	0.882856	0.47	1.66	0.887916	0.955258	0.964948	0.59	1.58
GZF1	225884_s_at	0.884703	0.96536	1.02142	0.77	1.36	0.901637	0.986796	1.02099	0.73	1.42	0.768234	0.905289	1.04299	0.79	1.38	0.832902	0.921969	1.03604	0.75	1.44
GEMIN2	205063_at	0.152959	0.921233	1.31665	0.9	1.92	0.392921	0.884708	1.11432	0.87	1.43	0.0125593	0.394075	1.60664	1.11	2.33	0.0298009	0.241393	1.34916	1.03	1.77
GEMIN2	210779_x_at	0.152959	0.921233	1.31665	0.9	1.92	0.0849725	0.608233	1.28025	0.97	1.7	0.0125593	0.394075	1.60664	1.11	2.33	0.00282943	0.0663134	1.56688	1.17	2.1
EGFR	201984_s_at	0.418269	0.921233	1.10034	0.87	1.39	0.925076	0.986796	1.00934	0.83	1.23	0.390843	0.850618	1.11186	0.87	1.42	0.668503	0.859183	1.0436	0.86	1.27
GZF1	234055_s_at	0.884703	0.96536	1.02142	0.77	1.36	0.998641	0.998829	1.00035	0.67	1.5	0.768234	0.905289	1.04299	0.79	1.38	0.941114	0.980174	1.01532	0.68	1.52
SNX6	217789_at	0.654833	0.921233	1.09795	0.73	1.65	0.897249	0.986796	1.02877	0.67	1.58	0.0490539	0.394075	1.45134	1	2.1	0.220282	0.606964	1.33085	0.84	2.1
PNN	1567214_a_at	0.446955	0.921233	1.17104	0.78	1.76	0.0788308	0.608233	1.34601	0.97	1.87	0.048492	0.394075	1.4888	1	2.21	0.0108235	0.125168	1.59702	1.11	2.29
SLC35E3	218988_at	0.490129	0.921233	1.15707	0.76	1.75	0.51886	0.927534	1.11466	0.8	1.55	0.741987	0.905289	1.06897	0.72	1.59	0.382372	0.704073	1.14582	0.84	1.56
CST3	237623_at	0.899025	0.966752	1.01888	0.76	1.36	0.468222	0.927534	0.861909	0.58	1.29	0.768015	0.905289	1.04312	0.79	1.38	0.288786	0.669117	0.788922	0.51	1.22
GEMIN2	211114_x_at	0.152959	0.921233	1.31665	0.9	1.92	0.0641462	0.571349	1.29871	0.98	1.71	0.0125593	0.394075	1.60664	1.11	2.33	0.00363057	0.0772505	1.54284	1.15	2.07
CPSF6	226934_at	0.486182	0.921233	1.18353	0.74	1.9	0.358228	0.864468	0.886111	0.68	1.15	0.657207	0.905289	1.10576	0.71	1.72	0.395219	0.70661	0.893626	0.69	1.16
MRPS17	218982_s_at	0.984934	0.987987	1.00414	0.65	1.54	0.764163	0.973269	1.05077	0.76	1.45	0.893903	0.914813	0.970485	0.62	1.51	0.256248	0.641457	1.19702	0.88	1.63
TRAPPC6B	225537_at	0.446955	0.921233	1.17104	0.78	1.76	0.459969	0.917542	1.16083	0.78	1.72	0.048492	0.394075	1.4888	1	2.21	0.0949422	0.409367	1.40641	0.94	2.1
LANCL2	218219_s_at	0.625433	0.921233	1.07573	0.8	1.44	0.573538	0.927534	1.11487	0.76	1.63	0.629616	0.905289	1.07813	0.79	1.46	0.244433	0.629376	1.24368	0.86	1.8
MRPS35	217942_at	0.725166	0.921233	0.898274	0.49	1.63	0.646599	0.94041	1.07693	0.78	1.48	0.636709	0.905289	0.853597	0.44	1.65	0.387883	0.704073	1.1562	0.83	1.61
CMAS	218111_s_at	0.775767	0.921233	0.918852	0.51	1.64	0.100314	0.611423	1.24041	0.96	1.6	0.777719	0.905289	0.915709	0.5	1.69	0.0823134	0.387486	1.2846	0.97	1.7
FAM177A1	227029_at	0.51762	0.921233	1.13623	0.77	1.67	0.788306	0.973269	0.962569	0.73	1.27	0.0282733	0.394075	1.48888	1.04	2.12	0.367507	0.704073	1.14554	0.85	1.54
CCDC91	218545_at	0.758728	0.921233	0.912258	0.51	1.64	0.655586	0.94041	0.9234	0.65	1.31	0.670419	0.905289	0.86983	0.46	1.65	0.863034	0.943729	0.967513	0.66	1.41
SNX6	222410_s_at	0.654833	0.921233	1.09795	0.73	1.65	0.716598	0.966398	1.07586	0.72	1.6	0.0490539	0.394075	1.45134	1	2.1	0.0336695	0.241393	1.59242	1.04	2.45
BAZ1A	217986_s_at	0.601205	0.921233	1.11235	0.75	1.66	0.856375	0.973269	0.970394	0.7	1.34	0.0344553	0.394075	1.47696	1.03	2.12	0.405748	0.707224	1.15746	0.82	1.63
FGFR1OP2	223263_s_at	0.796157	0.921233	0.927154	0.52	1.65	0.97178	0.994424	0.994015	0.71	1.39	0.699204	0.905289	0.882856	0.47	1.66	0.6855	0.863954	1.07116	0.77	1.49
BAZ1A	217985_s_at	0.601205	0.921233	1.11235	0.75	1.66	0.818314	0.973269	0.965752	0.72	1.3	0.0344553	0.394075	1.47696	1.03	2.12	0.298945	0.684216	1.18374	0.86	1.63
PPP2R3C	218852_at	0.51762	0.921233	1.13623	0.77	1.67	0.110455	0.631409	1.29214	0.94	1.77	0.0282733	0.394075	1.48888	1.04	2.12	0.00113229	0.0460205	1.76488	1.25	2.48
CAND1	239771_at	0.560921	0.921233	1.17263	0.69	2.01	0.891864	0.986796	1.01535	0.82	1.26	0.815691	0.905289	1.06304	0.64	1.78	0.623563	0.843903	1.05399	0.85	1.3
NUP107	218768_at	0.490129	0.921233	1.15707	0.76	1.75	0.0287025	0.398343	1.45588	1.04	2.04	0.741987	0.905289	1.06897	0.72	1.59	0.0202301	0.18448	1.43253	1.06	1.94
LOC100129794	230307_at	0.737125	0.921233	1.0486	0.79	1.38	0.713927	0.966198	1.05254	0.8	1.38	0.319894	0.816796	1.14786	0.87	1.51	0.313236	0.684216	1.14839	0.88	1.5
RALGAPA1	213049_at	0.624491	0.921233	1.0979	0.76	1.6	0.530329	0.927534	0.900581	0.65	1.25	0.136426	0.562969	1.32443	0.92	1.92	0.659383	0.85608	1.08075	0.77	1.53
RALGAPA1	214855_s_at	0.624491	0.921233	1.0979	0.76	1.6	0.565826	0.927534	0.919289	0.69	1.23	0.136426	0.562969	1.32443	0.92	1.92	0.574393	0.81446	1.08974	0.81	1.47
ASUN	221652_s_at	0.796157	0.921233	0.927154	0.52	1.65	0.725781	0.968878	1.06514	0.75	1.52	0.699204	0.905289	0.882856	0.47	1.66	0.335511	0.695911	1.19489	0.83	1.72
PNN	212036_s_at	0.446955	0.921233	1.17104	0.78	1.76	0.0619763	0.565165	1.38594	0.98	1.95	0.048492	0.394075	1.4888	1	2.21	0.0132209	0.136854	1.59984	1.1	2.32
RAP1B	200833_s_at	0.490129	0.921233	1.15707	0.76	1.75	0.179301	0.729156	1.42866	0.85	2.4	0.741987	0.905289	1.06897	0.72	1.59	0.337174	0.695911	1.27294	0.78	2.08
MDM2	205386_s_at	0.490129	0.921233	1.15707	0.76	1.75	0.175524	0.729156	1.23106	0.91	1.66	0.741987	0.905289	1.06897	0.72	1.59	0.362557	0.704073	1.14149	0.86	1.52
SEC61G	203484_at	0.723958	0.921233	1.07223	0.73	1.58	0.392198	0.884708	0.780289	0.44	1.38	0.839628	0.905289	1.042	0.7	1.55	0.972652	0.986428	0.989891	0.55	1.77
VOPP1	208091_s_at	0.759763	0.921233	1.056	0.74	1.5	0.980084	0.994424	1.0049	0.68	1.48	0.754461	0.905289	1.05887	0.74	1.52	0.63305	0.846423	1.09773	0.75	1.61
C8orf76	225702_at	0.399108	0.921233	1.1657	0.82	1.66	0.281766	0.783645	1.16273	0.88	1.53	0.558714	0.905289	1.1105	0.78	1.58	0.326188	0.69022	1.14751	0.87	1.51
MDM2	225160_x_at	0.490129	0.921233	1.15707	0.76	1.75	0.0682411	0.594008	1.32452	0.98	1.79	0.741987	0.905289	1.06897	0.72	1.59	0.278269	0.653846	1.17545	0.88	1.57
ZHX1-C8ORF76	1554063_at	0.399108	0.921233	1.1657	0.82	1.66	0.367907	0.864468	1.15022	0.85	1.56	0.558714	0.905289	1.1105	0.78	1.58	0.206677	0.587929	1.20365	0.9	1.6
EGFR	224999_at	0.418269	0.921233	1.10034	0.87	1.39	0.96734	0.994424	0.996393	0.84	1.18	0.390843	0.850618	1.11186	0.87	1.42	0.774051	0.88761	1.02568	0.86	1.22
FBXO33	227521_at	0.19618	0.921233	1.29073	0.88	1.9	0.183519	0.729156	1.28039	0.89	1.84	0.0135352	0.394075	1.60429	1.1	2.33	0.0119781	0.131075	1.61344	1.11	2.34
MIPOL1	1552572_a_at	0.671553	0.921233	1.06056	0.81	1.39	0.0304424	0.398343	1.43411	1.03	1.99	0.302593	0.783061	1.15266	0.88	1.51	0.00210216	0.0619328	1.72057	1.22	2.43
KLHL42	225963_at	0.725166	0.921233	0.898274	0.49	1.63	0.927537	0.986796	0.986665	0.74	1.32	0.636709	0.905289	0.853597	0.44	1.65	0.772457	0.88761	1.0465	0.77	1.42
CAND1	235224_s_at	0.560921	0.921233	1.17263	0.69	2.01	0.0996821	0.611423	1.33332	0.95	1.88	0.815691	0.905289	1.06304	0.64	1.78	0.416077	0.711417	1.15715	0.81	1.65
CAND1	207483_s_at	0.560921	0.921233	1.17263	0.69	2.01	0.0161789	0.344252	1.60947	1.09	2.37	0.815691	0.905289	1.06304	0.64	1.78	0.0855933	0.394966	1.39935	0.95	2.05
KIAA0391	202714_s_at	0.863634	0.957894	1.03518	0.7	1.54	0.882769	0.98285	0.965799	0.61	1.53	0.185775	0.649422	1.29351	0.88	1.89	0.684582	0.863954	1.10189	0.69	1.76
SS18	202817_s_at	0.492636	0.921233	1.31847	0.6	2.9	0.708037	0.966198	0.928706	0.63	1.37	0.892115	0.914813	1.05865	0.46	2.41	0.750387	0.88159	0.942147	0.65	1.36
PYROXD1	213878_at	0.856883	0.957409	0.950198	0.55	1.66	0.794228	0.973269	0.95998	0.71	1.3	0.842689	0.905289	0.942328	0.52	1.69	0.506818	0.767238	0.891815	0.64	1.25
KAT6A	226547_at	0.479141	0.921233	0.73187	0.31	1.74	0.189079	0.729156	0.737681	0.47	1.16	0.421422	0.886138	0.684919	0.27	1.72	0.241828	0.629376	0.764149	0.49	1.2
MDM1	213761_at	0.515574	0.921233	1.13029	0.78	1.64	0.395	0.884708	1.15296	0.83	1.6	0.795511	0.905289	1.04829	0.73	1.5	0.403023	0.707224	1.13932	0.84	1.55
PPP2R3C	1569894_at	0.51762	0.921233	1.13623	0.77	1.67	0.854078	0.973269	0.964808	0.66	1.41	0.0282733	0.394075	1.48888	1.04	2.12	0.341873	0.695911	1.20742	0.82	1.78
LOC100506233	228643_at	0.088146	0.921233	1.8372	0.91	3.7	0.561815	0.927534	1.13411	0.74	1.73	0.102608	0.551326	1.7216	0.9	3.31	0.352699	0.704073	1.20678	0.81	1.79
CFL2	224352_s_at	0.601205	0.921233	1.11235	0.75	1.66	0.458616	0.917542	0.874797	0.61	1.25	0.0344553	0.394075	1.47696	1.03	2.12	0.717017	0.869043	1.06978	0.74	1.54
MDM2	229711_s_at	0.490129	0.921233	1.15707	0.76	1.75	0.233045	0.756407	1.21775	0.88	1.68	0.741987	0.905289	1.06897	0.72	1.59	0.44706	0.732263	1.12647	0.83	1.53
LOC100506233	228612_at	0.088146	0.921233	1.8372	0.91	3.7	0.578097	0.927534	0.898594	0.62	1.31	0.102608	0.551326	1.7216	0.9	3.31	0.871442	0.946629	0.969959	0.67	1.4
C12orf66	1554068_s_at	0.789363	0.921233	1.16525	0.38	3.58	0.620519	0.931996	1.12381	0.71	1.78	0.888085	0.914813	1.08657	0.34	3.45	0.499836	0.762698	1.16124	0.75	1.79
CCDC90B	218288_s_at	0.110286	0.921233	1.78932	0.88	3.65	0.119012	0.638347	1.34919	0.93	1.97	0.128415	0.562969	1.67606	0.86	3.26	0.0346648	0.241393	1.44683	1.03	2.04
CNOT2	217798_at	0.987987	0.987987	1.0086	0.33	3.08	0.575044	0.927534	1.1967	0.64	2.24	0.911054	0.920669	1.06958	0.33	3.48	0.76636	0.88761	1.10054	0.59	2.07
PPP4R2	225519_at	0.302535	0.921233	1.51145	0.69	3.31	0.00864831	0.301119	1.65953	1.14	2.42	0.467903	0.905086	1.31976	0.62	2.79	0.0109982	0.125168	1.59068	1.11	2.27
DYRK2	202970_at	0.496277	0.921233	1.1464	0.77	1.7	0.374768	0.872125	1.2271	0.78	1.93	0.788481	0.905289	1.05381	0.72	1.55	0.586184	0.819374	1.12782	0.73	1.74
MED21	209363_s_at	0.774473	0.921233	0.918632	0.51	1.64	0.2737	0.783645	1.17546	0.88	1.57	0.688696	0.905289	0.8782	0.47	1.66	0.12779	0.466131	1.2585	0.94	1.69
PTHLH	210355_at	0.720439	0.921233	0.896282	0.49	1.63	0.342034	0.845156	0.912043	0.75	1.1	0.631631	0.905289	0.851163	0.44	1.64	0.465412	0.746687	0.928912	0.76	1.13
GOLGA7	217819_at	0.200129	0.921233	0.55028	0.22	1.37	0.637032	0.937717	0.886071	0.54	1.46	0.139706	0.563237	0.482739	0.18	1.27	0.484543	0.750141	0.826732	0.48	1.41
UBE2V2	230411_at	0.665352	0.921233	0.86997	0.46	1.64	0.902557	0.986796	0.975945	0.66	1.44	0.522405	0.905289	0.797605	0.4	1.59	0.549426	0.790903	0.884595	0.59	1.32
ETNK1	224454_at	0.806311	0.930103	0.929841	0.52	1.66	0.950434	0.99376	0.989458	0.71	1.38	0.721802	0.905289	0.891224	0.47	1.68	0.823053	0.91642	1.04055	0.73	1.47
SHQ1	63009_at	0.503888	0.921233	1.35032	0.56	3.26	0.00553386	0.253324	1.81113	1.19	2.76	0.698877	0.905289	1.18148	0.51	2.75	0.0126008	0.134058	1.66939	1.12	2.5
MIPOL1	244246_at	0.671553	0.921233	1.06056	0.81	1.39	0.0921083	0.608233	1.22901	0.97	1.56	0.302593	0.783061	1.15266	0.88	1.51	0.00543402	0.0876774	1.43311	1.11	1.85
ARMC1	222550_at	0.603239	0.921233	0.794341	0.33	1.89	0.754952	0.973269	1.07661	0.68	1.71	0.59806	0.905289	0.78163	0.31	1.95	0.708478	0.864162	1.09877	0.67	1.8
SS18	202816_s_at	0.492636	0.921233	1.31847	0.6	2.9	0.476332	0.927534	1.14483	0.79	1.66	0.892115	0.914813	1.05865	0.46	2.41	0.34312	0.695911	1.18956	0.83	1.7
BICD1	1554020_at	0.882103	0.96536	0.95196	0.5	1.82	0.700066	0.964479	0.956316	0.76	1.2	0.681056	0.905289	0.85698	0.41	1.79	0.895073	0.960261	0.984278	0.78	1.25
USP15	244028_at	0.901124	0.966752	1.07957	0.32	3.61	0.564738	0.927534	1.18168	0.67	2.09	0.850924	0.905289	0.88596	0.25	3.13	0.910087	0.962882	0.965457	0.52	1.78
FGFR1OP2	243619_at	0.796157	0.921233	0.927154	0.52	1.65	0.237577	0.758267	0.757161	0.48	1.2	0.699204	0.905289	0.882856	0.47	1.66	0.321145	0.687142	0.789628	0.5	1.26
KRAS	204009_s_at	0.766824	0.921233	0.91692	0.52	1.63	0.516979	0.927534	0.883386	0.61	1.29	0.620104	0.905289	0.848917	0.44	1.62	0.664571	0.858099	0.917609	0.62	1.35
TM7SF3	222477_s_at	0.796157	0.921233	0.927154	0.52	1.65	0.728556	0.968878	0.942662	0.68	1.32	0.699204	0.905289	0.882856	0.47	1.66	0.987133	0.997551	1.003	0.7	1.44
MED21	209362_at	0.774473	0.921233	0.918632	0.51	1.64	0.116062	0.638347	1.27856	0.94	1.74	0.688696	0.905289	0.8782	0.47	1.66	0.0366797	0.246462	1.39806	1.02	1.91
PPFIBP1	1569464_at	0.725166	0.921233	0.898274	0.49	1.63	0.382551	0.872125	0.821761	0.53	1.28	0.636709	0.905289	0.853597	0.44	1.65	0.448992	0.732263	0.842324	0.54	1.31
USP15	209475_at	0.901124	0.966752	1.07957	0.32	3.61	0.824282	0.973269	0.949295	0.6	1.5	0.850924	0.905289	0.88596	0.25	3.13	0.966239	0.986428	0.990412	0.63	1.55
C12orf66	1554067_at	0.789363	0.921233	1.16525	0.38	3.58	0.537042	0.927534	0.886128	0.6	1.3	0.888085	0.914813	1.08657	0.34	3.45	0.955166	0.983433	0.989479	0.68	1.43
UBXN2B	238903_at	0.28126	0.921233	0.643483	0.29	1.43	0.666067	0.941795	0.909194	0.59	1.4	0.289901	0.780348	0.633957	0.27	1.47	0.932428	0.975834	1.01867	0.66	1.56
CAND1	1556318_s_at	0.560921	0.921233	1.17263	0.69	2.01	0.380645	0.872125	1.14972	0.84	1.57	0.815691	0.905289	1.06304	0.64	1.78	0.576289	0.81446	1.08867	0.81	1.47
PSPH	205194_at	0.984934	0.987987	1.00414	0.65	1.54	0.854965	0.973269	1.01956	0.83	1.25	0.893903	0.914813	0.970485	0.62	1.51	0.123162	0.457972	1.18139	0.96	1.46
SLC25A36	223698_at	0.255334	0.921233	1.91776	0.62	5.89	0.0416377	0.46941	1.43167	1.01	2.02	0.360976	0.850618	1.64344	0.57	4.77	0.125337	0.461579	1.29681	0.93	1.81
TM7SF3	226478_at	0.796157	0.921233	0.927154	0.52	1.65	0.524659	0.927534	0.909835	0.68	1.22	0.699204	0.905289	0.882856	0.47	1.66	0.809813	0.906896	0.96379	0.71	1.3
PNN	212037_at	0.446955	0.921233	1.17104	0.78	1.76	0.00977997	0.312144	1.63764	1.13	2.38	0.048492	0.394075	1.4888	1	2.21	0.00270526	0.0663134	1.82971	1.23	2.72
MON2	212754_s_at	0.901124	0.966752	1.07957	0.32	3.61	0.676853	0.941795	1.13244	0.63	2.03	0.850924	0.905289	0.88596	0.25	3.13	0.699344	0.863954	1.1163	0.64	1.95
FGFR1OP2	1556283_s_at	0.796157	0.921233	0.927154	0.52	1.65	0.0582502	0.565165	0.746398	0.55	1.01	0.699204	0.905289	0.882856	0.47	1.66	0.160479	0.520878	0.790524	0.57	1.1
UBE2V2	209096_at	0.665352	0.921233	0.86997	0.46	1.64	0.137805	0.665194	1.29434	0.92	1.82	0.522405	0.905289	0.797605	0.4	1.59	0.14415	0.492942	1.29545	0.92	1.83
GOLT1B	222552_at	0.856883	0.957409	0.950198	0.55	1.66	0.998829	0.998829	0.999692	0.66	1.51	0.842689	0.905289	0.942328	0.52	1.69	0.823103	0.91642	1.05051	0.68	1.62
INTS4	225169_at	0.134646	0.921233	2.15018	0.79	5.86	0.550143	0.927534	1.2084	0.65	2.25	0.0712086	0.432903	2.28679	0.93	5.62	0.308943	0.684216	1.38472	0.74	2.59
SHQ1	219083_at	0.503888	0.921233	1.35032	0.56	3.26	0.000555776	0.176514	2.02681	1.36	3.03	0.698877	0.905289	1.18148	0.51	2.75	0.00110194	0.0460205	1.91084	1.3	2.82
PPP4R2	226317_at	0.302535	0.921233	1.51145	0.69	3.31	0.178732	0.729156	1.33944	0.87	2.05	0.467903	0.905086	1.31976	0.62	2.79	0.521308	0.768133	1.15049	0.75	1.77
TBK1	218520_at	0.671242	0.921233	1.26628	0.43	3.77	0.169635	0.729156	1.47185	0.85	2.56	0.760332	0.905289	1.19063	0.39	3.65	0.377658	0.704073	1.27028	0.75	2.16
MRPS22	226257_x_at	0.160329	0.921233	2.27673	0.72	7.18	0.00118648	0.176514	2.50701	1.44	4.37	0.122357	0.551326	2.23577	0.81	6.2	0.000400728	0.0384379	2.63479	1.54	4.51
PNN	1567213_at	0.446955	0.921233	1.17104	0.78	1.76	0.485064	0.927534	1.1196	0.82	1.54	0.048492	0.394075	1.4888	1	2.21	0.15891	0.520192	1.27441	0.91	1.79
C14orf166	217768_at	0.91571	0.970495	1.05788	0.37	3	0.458648	0.917542	1.24772	0.69	2.24	0.212327	0.691852	1.91403	0.69	5.31	0.0210749	0.187714	2.175	1.12	4.21
MRPS22	219220_x_at	0.160329	0.921233	2.27673	0.72	7.18	0.00195461	0.187154	2.28244	1.35	3.85	0.122357	0.551326	2.23577	0.81	6.2	0.000597345	0.0384379	2.4346	1.46	4.05
FBXO33	226970_at	0.19618	0.921233	1.29073	0.88	1.9	0.452682	0.917542	0.880947	0.63	1.23	0.0135352	0.394075	1.60429	1.1	2.33	0.872481	0.946629	1.02951	0.72	1.47
C11orf30	222807_at	0.304798	0.921233	1.83367	0.58	5.84	0.0794721	0.608233	1.5974	0.95	2.7	0.215091	0.691852	1.88537	0.69	5.14	0.0340013	0.241393	1.70705	1.04	2.8
METTL1	204027_s_at	0.52929	0.921233	0.786641	0.37	1.66	0.939831	0.988888	0.982619	0.62	1.55	0.711528	0.905289	0.855644	0.37	1.95	0.44636	0.732263	1.19764	0.75	1.91
KLHL42	225732_at	0.725166	0.921233	0.898274	0.49	1.63	0.936202	0.988888	0.984852	0.68	1.43	0.636709	0.905289	0.853597	0.44	1.65	0.757123	0.884079	0.936919	0.62	1.42
TRIT1	218617_at	0.172862	0.921233	0.410317	0.11	1.48	0.255573	0.776862	0.806008	0.56	1.17	0.0795943	0.454994	0.3078	0.08	1.15	0.328569	0.69144	0.841185	0.59	1.19
FGFR1OP2	233898_s_at	0.796157	0.921233	0.927154	0.52	1.65	0.0733834	0.608233	0.754832	0.55	1.03	0.699204	0.905289	0.882856	0.47	1.66	0.265772	0.644246	0.832352	0.6	1.15
FRS2	226045_at	0.463445	0.921233	1.19165	0.75	1.9	0.269063	0.783645	1.18888	0.87	1.62	0.67302	0.905289	1.10081	0.7	1.72	0.640683	0.846423	1.07548	0.79	1.46
DYRK2	202969_at	0.496277	0.921233	1.1464	0.77	1.7	0.191537	0.729156	1.31652	0.87	1.99	0.788481	0.905289	1.05381	0.72	1.55	0.189064	0.569318	1.28983	0.88	1.89
STK3	204068_at	0.176326	0.921233	0.57169	0.25	1.29	0.80678	0.973269	0.956662	0.67	1.36	0.186312	0.649422	0.568046	0.25	1.31	0.502892	0.764316	0.88293	0.61	1.27
SS18	209954_x_at	0.492636	0.921233	1.31847	0.6	2.9	0.337177	0.844044	1.19892	0.83	1.74	0.892115	0.914813	1.05865	0.46	2.41	0.398937	0.70661	1.17191	0.81	1.69
CCT6A	201326_at	0.984934	0.987987	1.00414	0.65	1.54	0.351486	0.857447	1.19151	0.82	1.72	0.893903	0.914813	0.970485	0.62	1.51	0.191805	0.569467	1.26887	0.89	1.81
TMEM126B	221622_s_at	0.103022	0.921233	2.38963	0.84	6.81	0.163326	0.72737	1.48324	0.85	2.58	0.0576309	0.394075	2.51523	0.97	6.52	0.0342815	0.241393	1.78632	1.04	3.06
ERGIC2	226422_at	0.651256	0.921233	0.845701	0.41	1.75	0.128319	0.655281	0.708334	0.45	1.1	0.578003	0.905289	0.801445	0.37	1.75	0.238889	0.629376	0.760341	0.48	1.2
PYROXD1	219802_at	0.856883	0.957409	0.950198	0.55	1.66	0.778167	0.973269	0.956452	0.7	1.3	0.842689	0.905289	0.942328	0.52	1.69	0.44002	0.732263	0.879333	0.63	1.22
DDX27	215693_x_at	0.110131	0.921233	0.445399	0.17	1.2	0.53927	0.927534	0.843467	0.49	1.45	0.231893	0.691852	0.528459	0.19	1.5	0.991428	0.99818	1.00305	0.58	1.75
TMEM126A	223334_at	0.103022	0.921233	2.38963	0.84	6.81	0.219074	0.748257	1.35701	0.83	2.21	0.0576309	0.394075	2.51523	0.97	6.52	0.0522186	0.31256	1.56768	1	2.47
DYRK2	202971_s_at	0.496277	0.921233	1.1464	0.77	1.7	0.22691	0.749195	1.23616	0.88	1.74	0.788481	0.905289	1.05381	0.72	1.55	0.237971	0.629376	1.21457	0.88	1.68
YTHDF3	221749_at	0.26034	0.921233	0.619652	0.27	1.43	0.558083	0.927534	0.8551	0.51	1.44	0.276716	0.780348	0.616377	0.26	1.47	0.376033	0.704073	0.786861	0.46	1.34
LEMD3	218604_at	0.919869	0.970495	1.0539	0.38	2.93	0.333384	0.84004	1.27526	0.78	2.09	0.95536	0.95536	1.03055	0.36	2.96	0.471889	0.746687	1.19748	0.73	1.96
MDM2	217542_at	0.490129	0.921233	1.15707	0.76	1.75	0.265026	0.783645	1.20706	0.87	1.68	0.741987	0.905289	1.06897	0.72	1.59	0.672014	0.860807	1.07307	0.77	1.49
ZC3H15	201595_s_at	0.641436	0.921233	1.30744	0.42	4.04	0.614651	0.931996	1.13601	0.69	1.87	0.293394	0.780348	1.79375	0.6	5.33	0.270397	0.647263	1.34268	0.8	2.27
AASDHPPT	202169_s_at	0.322666	0.921233	2.26895	0.45	11.51	0.459724	0.917542	1.2132	0.73	2.03	0.0593482	0.394075	4.54363	0.94	21.91	0.129818	0.466183	1.45729	0.9	2.37
ZNF713	1560201_at	0.984934	0.987987	1.00414	0.65	1.54	0.167564	0.729156	1.35882	0.88	2.1	0.893903	0.914813	0.970485	0.62	1.51	0.112452	0.445511	1.40883	0.92	2.15
DYRK2	202968_s_at	0.496277	0.921233	1.1464	0.77	1.7	0.363779	0.864468	1.23427	0.78	1.94	0.788481	0.905289	1.05381	0.72	1.55	0.397442	0.70661	1.20158	0.79	1.84
CHD7	218829_s_at	0.297738	0.921233	0.633756	0.27	1.5	0.67066	0.941795	1.06099	0.81	1.39	0.352366	0.850618	0.65528	0.27	1.6	0.357122	0.704073	1.13616	0.87	1.49
TBC1D30	213913_s_at	0.595068	0.921233	1.32151	0.47	3.69	0.243033	0.760889	1.12078	0.93	1.36	0.730987	0.905289	1.19944	0.43	3.38	0.400351	0.70661	1.08382	0.9	1.31
COPS5	201652_at	0.587814	0.921233	0.796382	0.35	1.81	0.490656	0.927534	1.15109	0.77	1.72	0.646377	0.905289	0.815701	0.34	1.95	0.408085	0.707224	1.19549	0.78	1.83
KAT6A	202423_at	0.479141	0.921233	0.73187	0.31	1.74	0.648939	0.94041	0.907426	0.6	1.38	0.421422	0.886138	0.684919	0.27	1.72	0.53936	0.784249	0.876705	0.58	1.33
SCFD1	215548_s_at	0.64322	0.921233	1.19538	0.56	2.54	0.667549	0.941795	0.8979	0.55	1.47	0.0930165	0.516309	1.89061	0.9	3.98	0.414723	0.711417	1.23914	0.74	2.07
TBC1D30	213912_at	0.595068	0.921233	1.32151	0.47	3.69	0.18588	0.729156	1.15775	0.93	1.44	0.730987	0.905289	1.19944	0.43	3.38	0.473728	0.746687	1.08362	0.87	1.35
TRAPPC8	207305_s_at	0.72651	0.921233	0.829712	0.29	2.36	0.796074	0.973269	0.931218	0.54	1.6	0.705238	0.905289	0.809242	0.27	2.42	0.694508	0.863954	1.12215	0.63	1.99
C11orf30	219012_s_at	0.304798	0.921233	1.83367	0.58	5.84	0.0945935	0.611423	1.42267	0.94	2.15	0.215091	0.691852	1.88537	0.69	5.14	0.00754423	0.101325	1.67871	1.15	2.45
ALG8	203545_at	0.222258	0.921233	1.87836	0.68	5.17	0.282144	0.783645	1.32873	0.79	2.23	0.341303	0.837943	1.58941	0.61	4.13	0.0292155	0.241393	1.67312	1.05	2.66
PPFIA1	202066_at	0.275779	0.921233	1.73177	0.65	4.65	0.318443	0.82408	1.28466	0.79	2.1	0.218925	0.691852	1.78819	0.71	4.52	0.07124	0.373766	1.55157	0.96	2.5
C18orf8	221190_s_at	0.530596	0.921233	0.723172	0.26	1.99	0.244359	0.760889	0.749439	0.46	1.22	0.454515	0.905086	0.6819	0.25	1.86	0.631705	0.846423	0.886052	0.54	1.45
BUD13	224504_s_at	0.493106	0.921233	1.73165	0.36	8.32	0.0609132	0.565165	2.00702	0.97	4.16	0.113255	0.551326	3.18376	0.76	13.35	0.00672528	0.0990686	2.59401	1.3	5.17
FBXO25	225591_at	0.649382	0.921233	0.831661	0.38	1.84	0.655084	0.94041	0.916272	0.62	1.34	0.629337	0.905289	0.804686	0.33	1.94	0.696029	0.863954	0.920139	0.61	1.4
CCT6A	201327_s_at	0.984934	0.987987	1.00414	0.65	1.54	0.523893	0.927534	1.1284	0.78	1.64	0.893903	0.914813	0.970485	0.62	1.51	0.148183	0.502248	1.3044	0.91	1.87
DCTN2	200932_s_at	0.712811	0.921233	0.870905	0.42	1.82	0.632145	0.937717	1.14413	0.66	1.99	0.844825	0.905289	0.921705	0.41	2.09	0.570416	0.81446	1.19764	0.64	2.23
MRPS22	223448_x_at	0.160329	0.921233	2.27673	0.72	7.18	0.0031881	0.235564	2.2528	1.31	3.86	0.122357	0.551326	2.23577	0.81	6.2	0.00171833	0.0548434	2.3753	1.38	4.08
RRS1	209567_at	0.485069	0.921233	0.760435	0.35	1.64	0.215983	0.748257	0.804224	0.57	1.14	0.571344	0.905289	0.786297	0.34	1.81	0.510299	0.768133	0.887728	0.62	1.27
MRPS22	228059_x_at	0.160329	0.921233	2.27673	0.72	7.18	0.00744548	0.285162	2.26225	1.24	4.11	0.122357	0.551326	2.23577	0.81	6.2	0.00294341	0.0663134	2.40052	1.35	4.28
CFL2	224663_s_at	0.601205	0.921233	1.11235	0.75	1.66	0.796749	0.973269	0.961739	0.71	1.29	0.0344553	0.394075	1.47696	1.03	2.12	0.362241	0.704073	1.15984	0.84	1.6
BRMS1L	226580_at	0.587763	0.921233	1.10765	0.77	1.6	0.504947	0.927534	0.894877	0.65	1.24	0.120883	0.551326	1.33589	0.93	1.93	0.971384	0.986428	0.99387	0.71	1.39
KIAA1551	218614_at	0.916645	0.970495	0.966627	0.51	1.83	0.140681	0.665194	0.69817	0.43	1.13	0.712119	0.905289	0.874059	0.43	1.79	0.169417	0.532674	0.717717	0.45	1.15
STAU1	208948_s_at	0.110131	0.921233	0.445399	0.17	1.2	0.652539	0.94041	0.868895	0.47	1.6	0.231893	0.691852	0.528459	0.19	1.5	0.739588	0.880053	0.901073	0.49	1.67
CCT2	201947_s_at	0.537552	0.921233	1.20574	0.67	2.19	0.0134703	0.334077	1.60591	1.1	2.34	0.678331	0.905289	1.12861	0.64	2	0.0161677	0.158775	1.55681	1.09	2.23
TAF2	1554721_a_at	0.729552	0.921233	0.885148	0.44	1.77	0.778326	0.973269	0.924016	0.53	1.6	0.750397	0.905289	0.88402	0.41	1.89	0.92088	0.968948	0.970274	0.53	1.76
TM7SF3	217974_at	0.796157	0.921233	0.927154	0.52	1.65	0.324664	0.828976	0.852829	0.62	1.17	0.699204	0.905289	0.882856	0.47	1.66	0.381543	0.704073	0.857429	0.61	1.21
TBC1D15	218268_at	0.723165	0.921233	0.777924	0.19	3.12	0.610091	0.931996	1.15617	0.66	2.02	0.631934	0.905289	0.692341	0.15	3.12	0.685287	0.863954	1.12064	0.65	1.94
STAU1	207320_x_at	0.110131	0.921233	0.445399	0.17	1.2	0.608421	0.931996	0.850591	0.46	1.58	0.231893	0.691852	0.528459	0.19	1.5	0.617271	0.841334	0.852601	0.46	1.59
RB1CC1	202033_s_at	0.700951	0.921233	0.86073	0.4	1.85	0.431782	0.91366	1.18217	0.78	1.79	0.625123	0.905289	0.819224	0.37	1.82	0.734997	0.8797	1.07528	0.71	1.64
MTFR1	203208_s_at	0.603239	0.921233	0.794341	0.33	1.89	0.691514	0.956136	1.06049	0.79	1.42	0.59806	0.905289	0.78163	0.31	1.95	0.436601	0.730211	1.12327	0.84	1.51
UBXN2B	212934_at	0.28126	0.921233	0.643483	0.29	1.43	0.603785	0.931996	0.888283	0.57	1.39	0.289901	0.780348	0.633957	0.27	1.47	0.429568	0.727985	0.826022	0.51	1.33
C11orf73	230326_s_at	0.245409	0.921233	1.97438	0.63	6.22	0.841764	0.973269	1.06971	0.55	2.07	0.13817	0.562969	2.16452	0.78	6.01	0.657253	0.85608	1.16094	0.6	2.24
FAM96B	218074_at	0.0788319	0.921233	0.344924	0.11	1.13	0.100574	0.611423	0.620542	0.35	1.1	0.061735	0.394075	0.310349	0.09	1.06	0.0898098	0.399967	0.598168	0.33	1.08
NDUFB9	222992_s_at	0.400104	0.921233	0.725989	0.34	1.53	0.381969	0.872125	0.828403	0.54	1.26	0.450208	0.905086	0.742319	0.34	1.61	0.522006	0.768133	0.86765	0.56	1.34
BICD1	214806_at	0.882103	0.96536	0.95196	0.5	1.82	0.079421	0.608233	1.27242	0.97	1.67	0.681056	0.905289	0.85698	0.41	1.79	0.116767	0.451736	1.25119	0.95	1.66
PIK3CB	212688_at	0.0530247	0.921233	2.98788	0.99	9.06	0.00595277	0.253324	1.92986	1.21	3.08	0.0708139	0.432903	2.52349	0.92	6.89	0.0340183	0.241393	1.68932	1.04	2.74
DDX27	221780_s_at	0.110131	0.921233	0.445399	0.17	1.2	0.60662	0.931996	0.884851	0.56	1.41	0.231893	0.691852	0.528459	0.19	1.5	0.846824	0.934679	1.04993	0.64	1.72
ERICH1	227017_at	0.666269	0.921233	0.82628	0.35	1.97	0.49403	0.927534	1.13988	0.78	1.66	0.690904	0.905289	0.821956	0.31	2.16	0.265451	0.644246	1.25885	0.84	1.89
CAND1	208838_at	0.560921	0.921233	1.17263	0.69	2.01	0.0494293	0.525873	1.45572	1	2.12	0.815691	0.905289	1.06304	0.64	1.78	0.133401	0.466183	1.31362	0.92	1.88
SEC23A	212887_at	0.152959	0.921233	1.31665	0.9	1.92	0.575639	0.927534	1.10441	0.78	1.56	0.0125593	0.394075	1.60664	1.11	2.33	0.0804561	0.387486	1.40041	0.96	2.04
KIAA0146	212523_s_at	0.482633	0.921233	0.776989	0.38	1.57	0.917907	0.986796	1.01782	0.73	1.42	0.339502	0.837943	0.678653	0.31	1.5	0.997297	0.99818	0.999435	0.72	1.39
CABLES1	225532_at	0.539254	0.921233	0.733037	0.27	1.98	0.197118	0.732973	0.823376	0.61	1.11	0.46426	0.905086	0.692245	0.26	1.85	0.186381	0.569318	0.80712	0.59	1.11
DLAT	212568_s_at	0.751558	0.921233	1.30712	0.25	6.86	0.0616423	0.565165	1.51545	0.98	2.34	0.188214	0.649422	2.70542	0.61	11.91	0.00533088	0.0876774	1.90781	1.21	3.01
RYBP	201845_s_at	0.472557	0.921233	1.37652	0.58	3.29	0.441782	0.914608	1.25733	0.7	2.25	0.657341	0.905289	1.20765	0.52	2.78	0.32294	0.687145	1.3039	0.77	2.21
LRRC47	212904_at	0.563637	0.921233	0.715357	0.23	2.23	0.579415	0.927534	1.18856	0.65	2.19	0.478066	0.905289	0.629487	0.18	2.26	0.482128	0.750141	1.26468	0.66	2.43
RNF26	224947_at	0.474105	0.921233	1.74316	0.38	7.98	0.437845	0.914593	1.21221	0.75	1.97	0.0610274	0.394075	3.64252	0.94	14.09	0.0972648	0.409367	1.53672	0.92	2.55
KLHL42	225961_at	0.725166	0.921233	0.898274	0.49	1.63	0.308663	0.805205	0.870646	0.67	1.14	0.636709	0.905289	0.853597	0.44	1.65	0.381688	0.704073	0.879861	0.66	1.17
PARP2	204752_x_at	0.976181	0.987987	0.982486	0.31	3.13	0.420602	0.896929	1.20657	0.76	1.91	0.608172	0.905289	1.3506	0.43	4.26	0.0893139	0.399967	1.49061	0.94	2.36
TMEM126B	1554537_at	0.103022	0.921233	2.38963	0.84	6.81	0.253808	0.776862	1.4324	0.77	2.66	0.0576309	0.394075	2.51523	0.97	6.52	0.150681	0.506236	1.52666	0.86	2.72
GMFB	202544_at	0.462164	0.921233	1.44654	0.54	3.87	0.122364	0.638347	1.52643	0.89	2.61	0.105709	0.551326	2.23702	0.84	5.93	0.0344459	0.241393	1.84343	1.05	3.25
CAND1	243910_x_at	0.560921	0.921233	1.17263	0.69	2.01	0.156453	0.716618	1.33515	0.9	1.99	0.815691	0.905289	1.06304	0.64	1.78	0.304042	0.684216	1.2198	0.84	1.78
HYLS1	227687_at	0.322887	0.921233	2.06702	0.49	8.72	0.0425217	0.46941	1.40557	1.01	1.95	0.0410899	0.394075	3.81141	1.06	13.76	0.00132174	0.0460205	1.70532	1.23	2.36
RECQL	212918_at	0.856883	0.957409	0.950198	0.55	1.66	0.709933	0.966198	0.926263	0.62	1.39	0.842689	0.905289	0.942328	0.52	1.69	0.772327	0.88761	1.06311	0.7	1.61
ARMC1	218185_s_at	0.603239	0.921233	0.794341	0.33	1.89	0.366777	0.864468	1.20248	0.81	1.79	0.59806	0.905289	0.78163	0.31	1.95	0.37154	0.704073	1.21261	0.79	1.85
RAB21	203885_at	0.675244	0.921233	0.740538	0.18	3.02	0.286164	0.783645	1.36414	0.77	2.41	0.583586	0.905289	0.652882	0.14	3	0.602215	0.82967	1.16839	0.65	2.1
STK38L	212572_at	0.774473	0.921233	0.918632	0.51	1.64	0.713092	0.966198	1.07489	0.73	1.58	0.688696	0.905289	0.8782	0.47	1.66	0.343413	0.695911	1.21999	0.81	1.84
INTS4	1569253_at	0.134646	0.921233	2.15018	0.79	5.86	0.594896	0.931996	1.09312	0.79	1.52	0.0712086	0.432903	2.28679	0.93	5.62	0.484711	0.750141	1.12081	0.81	1.54
FOXA1	204667_at	0.647985	0.921233	1.06494	0.81	1.4	0.159376	0.718128	1.14707	0.95	1.39	0.263519	0.764603	1.1637	0.89	1.52	0.0305707	0.241393	1.24765	1.02	1.52
PARK7	200006_at	0.724046	0.921233	0.810488	0.25	2.6	0.534021	0.927534	1.25356	0.61	2.56	0.803453	0.905289	0.86041	0.26	2.81	0.391106	0.706573	1.38107	0.66	2.89
STAU1	213037_x_at	0.110131	0.921233	0.445399	0.17	1.2	0.507153	0.927534	0.807785	0.43	1.52	0.231893	0.691852	0.528459	0.19	1.5	0.485733	0.750141	0.796688	0.42	1.51
RAB21	226268_at	0.675244	0.921233	0.740538	0.18	3.02	0.849172	0.973269	1.03856	0.7	1.53	0.583586	0.905289	0.652882	0.14	3	0.995494	0.99818	1.00105	0.69	1.44
MON2	212755_at	0.901124	0.966752	1.07957	0.32	3.61	0.237379	0.758267	0.645441	0.31	1.33	0.850924	0.905289	0.88596	0.25	3.13	0.0621752	0.345455	0.489206	0.23	1.04
ZC3H15	201593_s_at	0.641436	0.921233	1.30744	0.42	4.04	0.726653	0.968878	1.08043	0.7	1.67	0.293394	0.780348	1.79375	0.6	5.33	0.205823	0.587929	1.33268	0.85	2.08
MTMR2	203212_s_at	0.72621	0.921233	1.38706	0.22	8.66	0.184856	0.729156	1.45354	0.84	2.53	0.46129	0.905086	2.0287	0.31	13.32	0.157549	0.520184	1.50399	0.85	2.65
POP4	202868_s_at	0.613518	0.921233	1.19823	0.59	2.42	0.0420952	0.46941	1.51079	1.01	2.25	0.645396	0.905289	1.18273	0.58	2.42	0.0525766	0.31256	1.4956	1	2.25
KIAA0146	228325_at	0.482633	0.921233	0.776989	0.38	1.57	0.849189	0.973269	1.02061	0.83	1.26	0.339502	0.837943	0.678653	0.31	1.5	0.882046	0.951616	0.982917	0.78	1.23
NDUFA13	220864_s_at	0.488563	0.921233	0.687796	0.24	1.98	0.959707	0.994424	1.01475	0.57	1.79	0.396087	0.855618	0.609188	0.19	1.91	0.754766	0.884023	1.10073	0.6	2.01
UQCRFS1	208909_at	0.811108	0.930103	1.09353	0.53	2.28	0.0428965	0.46941	1.53348	1.01	2.32	0.721698	0.905289	1.14385	0.55	2.4	0.0422956	0.274563	1.54646	1.02	2.36
COPB2	201098_at	0.160329	0.921233	2.27673	0.72	7.18	0.105823	0.630092	1.57047	0.91	2.71	0.122357	0.551326	2.23577	0.81	6.2	0.169677	0.532674	1.5437	0.83	2.87
R3HDM2	203831_at	0.148151	0.921233	0.444119	0.15	1.33	0.331206	0.84004	0.73977	0.4	1.36	0.144619	0.570845	0.408196	0.12	1.36	0.305917	0.684216	0.709932	0.37	1.37
LPCAT2	227889_at	0.0982416	0.921233	0.349718	0.1	1.22	0.851428	0.973269	0.976478	0.76	1.25	0.131474	0.562969	0.406932	0.13	1.31	0.99818	0.99818	1.0003	0.77	1.3
MBIP	218411_s_at	0.55838	0.921233	1.0734	0.85	1.36	0.414333	0.891514	0.898972	0.7	1.16	0.157418	0.608999	1.18887	0.94	1.51	0.518997	0.768133	0.920173	0.71	1.18
TMEM68	226483_at	0.59126	0.921233	0.792549	0.34	1.85	0.782107	0.973269	0.957313	0.7	1.3	0.570889	0.905289	0.775367	0.32	1.87	0.807949	0.906896	0.963313	0.71	1.3
TIMM8B	218357_s_at	0.751558	0.921233	1.30712	0.25	6.86	0.290123	0.788064	1.35906	0.77	2.4	0.188214	0.649422	2.70542	0.61	11.91	0.0184186	0.176358	2.07315	1.13	3.8
C2CD5	212943_at	0.809928	0.930103	0.93115	0.52	1.67	0.921302	0.986796	0.980331	0.66	1.45	0.844855	0.905289	0.941463	0.51	1.72	0.793193	0.901463	1.05661	0.7	1.59
ZNF644	222580_at	0.0308208	0.921233	5.102	1.16	22.39	0.0205091	0.349641	1.8791	1.1	3.2	0.015822	0.394075	6.09906	1.4	26.49	0.0201872	0.18448	1.90207	1.11	3.27
NOL9	1554082_a_at	0.425102	0.921233	0.633127	0.21	1.95	0.404336	0.888721	1.21312	0.77	1.91	0.390585	0.850618	0.566401	0.15	2.07	0.263528	0.644246	1.32552	0.81	2.17
ZNF202	204329_s_at	0.273382	0.921233	2.37509	0.51	11.17	0.0848532	0.608233	1.76448	0.92	3.37	0.0127433	0.394075	6.11457	1.47	25.42	0.0151299	0.152494	2.1943	1.16	4.14
RB1CC1	202034_x_at	0.700951	0.921233	0.86073	0.4	1.85	0.978413	0.994424	0.994806	0.68	1.45	0.625123	0.905289	0.819224	0.37	1.82	0.704948	0.863954	0.929181	0.64	1.36
CAND1	208839_s_at	0.560921	0.921233	1.17263	0.69	2.01	0.0192415	0.349641	1.57469	1.08	2.3	0.815691	0.905289	1.06304	0.64	1.78	0.0870259	0.396796	1.38783	0.95	2.02
TMEM68	227936_at	0.59126	0.921233	0.792549	0.34	1.85	0.820969	0.973269	1.02961	0.8	1.33	0.570889	0.905289	0.775367	0.32	1.87	0.640519	0.846423	1.06358	0.82	1.38
GOLT1B	218193_s_at	0.856883	0.957409	0.950198	0.55	1.66	0.731879	0.969929	1.05876	0.76	1.47	0.842689	0.905289	0.942328	0.52	1.69	0.303838	0.684216	1.19259	0.85	1.67
EGFR	210984_x_at	0.418269	0.921233	1.10034	0.87	1.39	0.677504	0.941795	0.93979	0.7	1.26	0.390843	0.850618	1.11186	0.87	1.42	0.608958	0.832967	0.924263	0.68	1.25
PFDN4	205361_s_at	0.426222	0.921233	0.649609	0.22	1.88	0.796831	0.973269	0.956301	0.68	1.34	0.525078	0.905289	0.696462	0.23	2.13	0.759998	0.884739	1.0558	0.75	1.5
HEATR5A	226510_at	0.506667	0.921233	1.27408	0.62	2.6	0.539127	0.927534	0.899314	0.64	1.26	0.0560638	0.394075	2.00275	0.98	4.08	0.474256	0.746687	1.14336	0.79	1.65
AP5M1	218139_s_at	0.325967	0.921233	1.59434	0.63	4.04	0.08852	0.608233	1.5381	0.94	2.52	0.0748633	0.434434	2.33834	0.92	5.95	0.00567581	0.0876774	2.07795	1.24	3.49
SLC25A21	220474_at	0.663275	0.921233	1.05448	0.83	1.34	0.406074	0.888721	1.06561	0.92	1.24	0.25416	0.74308	1.14896	0.91	1.46	0.186647	0.569318	1.11142	0.95	1.3
G2E3	223258_s_at	0.462687	0.921233	1.30853	0.64	2.68	0.758079	0.973269	1.04198	0.8	1.35	0.0473132	0.394075	2.05437	1.01	4.18	0.163857	0.527373	1.21726	0.92	1.61
PARP2	215773_x_at	0.976181	0.987987	0.982486	0.31	3.13	0.489777	0.927534	1.17826	0.74	1.88	0.608172	0.905289	1.3506	0.43	4.26	0.11804	0.452094	1.45126	0.91	2.32
MAU2	227465_at	0.461556	0.921233	0.66958	0.23	1.95	0.421533	0.896929	0.776539	0.42	1.44	0.370111	0.850618	0.590613	0.19	1.87	0.377411	0.704073	0.73267	0.37	1.46
CNOT2	233054_at	0.987987	0.987987	1.0086	0.33	3.08	0.9719	0.994424	1.00876	0.62	1.64	0.911054	0.920669	1.06958	0.33	3.48	0.789136	0.901463	1.06511	0.67	1.69
TBP	203135_at	0.940111	0.978431	0.946235	0.22	4	0.027125	0.398343	2.0749	1.09	3.96	0.555815	0.905289	1.57515	0.35	7.14	0.00975084	0.12047	2.38027	1.23	4.59
PSPH	244819_x_at	0.984934	0.987987	1.00414	0.65	1.54	0.793011	0.973269	1.04027	0.77	1.4	0.893903	0.914813	0.970485	0.62	1.51	0.597328	0.8289	1.08076	0.81	1.44
IPO8	225528_at	0.6779	0.921233	0.87616	0.47	1.64	0.855053	0.973269	1.05456	0.6	1.86	0.601862	0.905289	0.834624	0.42	1.65	0.719769	0.869626	1.11814	0.61	2.06
MAU2	212505_s_at	0.461556	0.921233	0.66958	0.23	1.95	0.0810536	0.608233	0.531509	0.26	1.08	0.370111	0.850618	0.590613	0.19	1.87	0.0997294	0.415178	0.535291	0.25	1.13
TMEM218	226073_at	0.349556	0.921233	1.99765	0.47	8.51	0.281478	0.783645	1.34406	0.78	2.3	0.0473927	0.394075	3.69963	1.02	13.48	0.0530454	0.31256	1.75906	0.99	3.12
CNOT2	222182_s_at	0.987987	0.987987	1.0086	0.33	3.08	0.864778	0.973617	1.04931	0.6	1.83	0.911054	0.920669	1.06958	0.33	3.48	0.607825	0.832967	0.860143	0.48	1.53
DLAT	213149_at	0.751558	0.921233	1.30712	0.25	6.86	0.0578877	0.565165	1.55388	0.99	2.45	0.188214	0.649422	2.70542	0.61	11.91	0.00567114	0.0876774	1.95395	1.22	3.14
FAM60A	220147_s_at	0.579234	0.921233	0.816247	0.4	1.67	0.246506	0.761384	1.17327	0.9	1.54	0.387247	0.850618	0.698854	0.31	1.57	0.436194	0.730211	1.1242	0.84	1.51
ERGIC2	218135_at	0.651256	0.921233	0.845701	0.41	1.75	0.187983	0.729156	0.842873	0.65	1.09	0.578003	0.905289	0.801445	0.37	1.75	0.353798	0.704073	0.880682	0.67	1.15
YWHAB	208743_s_at	0.0153013	0.921233	0.259748	0.09	0.77	0.080565	0.608233	0.611333	0.35	1.06	0.0520182	0.394075	0.326549	0.11	1.01	0.211805	0.592125	0.700593	0.4	1.22
RAB2A	208732_at	0.24326	0.921233	0.593861	0.25	1.43	0.172106	0.729156	0.74584	0.49	1.14	0.287984	0.780348	0.610777	0.25	1.52	0.07822	0.387486	0.664393	0.42	1.05
C12orf66	235026_at	0.789363	0.921233	1.16525	0.38	3.58	0.211831	0.748257	1.27294	0.87	1.86	0.888085	0.914813	1.08657	0.34	3.45	0.214282	0.594711	1.28448	0.87	1.91
MTERFD1	219363_s_at	0.246107	0.921233	0.610592	0.27	1.41	0.361704	0.864468	0.821477	0.54	1.25	0.226567	0.691852	0.578513	0.24	1.4	0.728858	0.877838	0.926651	0.6	1.43
MRPL15	218027_at	0.594022	0.921233	0.784741	0.32	1.91	0.411923	0.891514	1.15884	0.81	1.65	0.507967	0.905289	0.727679	0.28	1.87	0.444487	0.732263	1.14711	0.81	1.63
COX6C	201754_at	0.290477	0.921233	0.68375	0.34	1.38	0.403445	0.888721	0.804787	0.48	1.34	0.357494	0.850618	0.719661	0.36	1.45	0.523453	0.768133	0.845929	0.51	1.41
TPD52	201690_s_at	0.791889	0.921233	0.902681	0.42	1.93	0.801759	0.973269	1.04344	0.75	1.45	0.898093	0.914813	1.05335	0.48	2.33	0.412207	0.71115	1.15876	0.81	1.65
APEX1	210027_s_at	0.976181	0.987987	0.982486	0.31	3.13	0.978917	0.994424	1.00662	0.62	1.64	0.608172	0.905289	1.3506	0.43	4.26	0.4493	0.732263	1.22122	0.73	2.05
UTP23	227402_s_at	0.44709	0.921233	0.719609	0.31	1.68	0.564142	0.927534	0.867697	0.54	1.41	0.390884	0.850618	0.683447	0.29	1.63	0.540579	0.784249	0.852032	0.51	1.42
CWF19L2	228916_at	0.302042	0.921233	2.40539	0.45	12.74	0.607968	0.931996	1.13037	0.71	1.81	0.0476159	0.394075	4.8375	1.02	23.02	0.282588	0.659946	1.28605	0.81	2.03
FRS2	238486_at	0.463445	0.921233	1.19165	0.75	1.9	0.0114123	0.334077	1.8895	1.15	3.09	0.67302	0.905289	1.10081	0.7	1.72	0.062236	0.345455	1.60165	0.98	2.63
PAX9	231145_at	0.636822	0.921233	1.0574	0.84	1.33	0.6258	0.93476	0.967785	0.85	1.1	0.233026	0.691852	1.15204	0.91	1.45	0.901385	0.962882	1.00874	0.88	1.16
ATP5L	210453_x_at	0.474105	0.921233	1.74316	0.38	7.98	0.61596	0.931996	1.20989	0.57	2.55	0.0610274	0.394075	3.64252	0.94	14.09	0.109724	0.44236	1.86817	0.87	4.02
ACTR10	222230_s_at	0.325967	0.921233	1.59434	0.63	4.04	0.534843	0.927534	1.1857	0.69	2.03	0.0748633	0.434434	2.33834	0.92	5.95	0.246291	0.629376	1.40218	0.79	2.48
WRAP73	236381_s_at	0.251503	0.921233	0.535806	0.18	1.56	0.61363	0.931996	0.885487	0.55	1.42	0.225632	0.691852	0.453625	0.13	1.63	0.635283	0.846423	0.88753	0.54	1.45
PAF1	202093_s_at	0.865356	0.957894	0.939836	0.46	1.93	0.833331	0.973269	1.06527	0.59	1.92	0.948487	0.95097	0.975708	0.46	2.06	0.749874	0.88159	1.10008	0.61	1.98
TCEB1	202824_s_at	0.576319	0.921233	0.813025	0.39	1.68	0.86047	0.973617	1.03706	0.69	1.56	0.917225	0.924466	0.960874	0.45	2.04	0.431549	0.728119	1.18209	0.78	1.79
C7orf31	229146_at	0.28599	0.921233	1.35434	0.78	2.36	0.66046	0.941795	1.0927	0.74	1.62	0.500428	0.905289	1.20345	0.7	2.06	0.909882	0.962882	1.02298	0.69	1.52
TDRKH	223530_at	0.155425	0.921233	1.56518	0.84	2.9	0.136311	0.665194	1.23701	0.94	1.64	0.327864	0.826132	1.38149	0.72	2.64	0.238727	0.629376	1.18076	0.9	1.56
ATP5L	208746_x_at	0.474105	0.921233	1.74316	0.38	7.98	0.511676	0.927534	1.28445	0.61	2.71	0.0610274	0.394075	3.64252	0.94	14.09	0.0778119	0.387486	1.99471	0.93	4.3
STRN3	204496_at	0.419313	0.921233	1.33708	0.66	2.71	0.678683	0.941795	0.922015	0.63	1.35	0.0438599	0.394075	2.06021	1.02	4.16	0.700461	0.863954	1.07936	0.73	1.59
VPS72	202261_at	0.205827	0.921233	1.47433	0.81	2.69	0.0227603	0.363216	1.57044	1.06	2.32	0.283497	0.780348	1.40266	0.76	2.6	0.0829605	0.387486	1.41914	0.96	2.11
C19orf12	223983_s_at	0.676571	0.921233	1.16133	0.58	2.35	0.923382	0.986796	1.02252	0.65	1.61	0.686483	0.905289	1.15769	0.57	2.36	0.973551	0.986428	1.00823	0.62	1.64
OSBPL1A	208158_s_at	0.928043	0.97381	1.04878	0.37	2.95	0.271911	0.783645	0.831368	0.6	1.16	0.756486	0.905289	0.847913	0.3	2.41	0.731817	0.878639	0.944403	0.68	1.31
SLC25A36	201919_at	0.255334	0.921233	1.91776	0.62	5.89	0.220151	0.748257	1.41272	0.81	2.45	0.360976	0.850618	1.64344	0.57	4.77	0.290009	0.669117	1.35597	0.77	2.38
UQCRB	205849_s_at	0.22335	0.921233	0.592988	0.26	1.38	0.627241	0.93476	0.864863	0.48	1.55	0.203771	0.690658	0.559531	0.23	1.37	0.703345	0.863954	0.891277	0.49	1.61
PSMB1	214288_s_at	0.940111	0.978431	0.946235	0.22	4	0.603793	0.931996	1.21195	0.59	2.5	0.555815	0.905289	1.57515	0.35	7.14	0.132389	0.466183	1.76126	0.84	3.68
RNF139	209510_at	0.400104	0.921233	0.725989	0.34	1.53	0.490949	0.927534	0.837772	0.51	1.39	0.450208	0.905086	0.742319	0.34	1.61	0.259007	0.644153	0.746212	0.45	1.24
UQCRB	209066_x_at	0.22335	0.921233	0.592988	0.26	1.38	0.90355	0.986796	0.966777	0.56	1.67	0.203771	0.690658	0.559531	0.23	1.37	0.827336	0.918462	0.939517	0.54	1.65
ENY2	218482_at	0.504795	0.921233	0.734759	0.3	1.82	0.827216	0.973269	1.05969	0.63	1.78	0.610215	0.905289	0.788803	0.32	1.96	0.537636	0.784249	1.18079	0.7	2
PHF3	217952_x_at	0.00673296	0.921233	4.16677	1.48	11.7	0.0409684	0.46941	2.049	1.03	4.08	0.000199069	0.0762434	8.12938	2.7	24.52	0.00385792	0.0777675	2.96468	1.42	6.2
MRPL13	218049_s_at	0.742684	0.921233	0.890641	0.45	1.78	0.212694	0.748257	1.2525	0.88	1.78	0.767009	0.905289	0.891441	0.42	1.91	0.133891	0.466183	1.31506	0.92	1.88
PTPLB	212640_at	0.486442	0.921233	1.61188	0.42	6.18	0.0303968	0.398343	1.8071	1.06	3.09	0.634286	0.905289	1.38324	0.36	5.27	0.152462	0.507765	1.51701	0.86	2.68
DENND5B	243613_at	0.82583	0.944157	0.930067	0.49	1.77	0.147928	0.690932	1.42381	0.88	2.3	0.584395	0.905289	0.814782	0.39	1.7	0.0827144	0.387486	1.54357	0.95	2.52
TCEA1	216241_s_at	0.594022	0.921233	0.784741	0.32	1.91	0.869391	0.973617	1.04136	0.64	1.69	0.507967	0.905289	0.727679	0.28	1.87	0.93252	0.975834	0.978112	0.59	1.63
C11orf73	219979_s_at	0.245409	0.921233	1.97438	0.63	6.22	0.933608	0.988888	1.02071	0.63	1.65	0.13817	0.562969	2.16452	0.78	6.01	0.695037	0.863954	1.09836	0.69	1.76
CFL2	233496_s_at	0.601205	0.921233	1.11235	0.75	1.66	0.819812	0.973269	1.02947	0.8	1.32	0.0344553	0.394075	1.47696	1.03	2.12	0.25132	0.633259	1.16946	0.9	1.53
SOCS4	226178_at	0.462979	0.921233	1.43674	0.55	3.78	0.107361	0.630092	1.4883	0.92	2.41	0.10888	0.551326	2.19996	0.84	5.77	0.0111115	0.125168	1.91576	1.16	3.16
FKBP3	218003_s_at	0.741574	0.921233	1.18613	0.43	3.27	0.96849	0.994424	0.992275	0.68	1.46	0.132842	0.562969	2.10996	0.8	5.59	0.33912	0.695911	1.22692	0.81	1.87
PARP2	214086_s_at	0.976181	0.987987	0.982486	0.31	3.13	0.712444	0.966198	1.07943	0.72	1.62	0.608172	0.905289	1.3506	0.43	4.26	0.190268	0.569318	1.3233	0.87	2.01
GNS	212334_at	0.595068	0.921233	1.32151	0.47	3.69	0.194188	0.729156	0.7443	0.48	1.16	0.730987	0.905289	1.19944	0.43	3.38	0.360743	0.704073	0.814198	0.52	1.27
KIAA1429	223110_at	0.389875	0.921233	0.660261	0.26	1.7	0.96149	0.994424	1.01284	0.6	1.7	0.404723	0.861161	0.657743	0.25	1.76	0.956722	0.983433	0.98554	0.58	1.67
C11orf30	242847_at	0.304798	0.921233	1.83367	0.58	5.84	0.346298	0.850205	1.4414	0.67	3.08	0.215091	0.691852	1.88537	0.69	5.14	0.0819778	0.387486	1.93109	0.92	4.05
DCAF13	231784_s_at	0.447281	0.921233	0.716912	0.3	1.69	0.794874	0.973269	0.963268	0.73	1.28	0.466299	0.905086	0.717458	0.29	1.75	0.750339	0.88159	1.04877	0.78	1.41
TPD52	201689_s_at	0.791889	0.921233	0.902681	0.42	1.93	0.79626	0.973269	1.04029	0.77	1.4	0.898093	0.914813	1.05335	0.48	2.33	0.46866	0.746687	1.12439	0.82	1.54
PUF60	209899_s_at	0.754003	0.921233	0.872248	0.37	2.05	0.797441	0.973269	1.0625	0.67	1.69	0.441445	0.905086	0.699956	0.28	1.74	0.690875	0.863954	1.10029	0.69	1.76
POLR2K	202634_at	0.272732	0.921233	0.641865	0.29	1.42	0.981442	0.994424	1.00503	0.66	1.53	0.372074	0.850618	0.693748	0.31	1.55	0.740466	0.880053	1.07383	0.7	1.64
POGK	218229_s_at	0.219799	0.921233	1.77851	0.71	4.46	0.088366	0.608233	1.51245	0.94	2.43	0.815445	0.905289	1.153	0.35	3.81	0.268397	0.646517	1.33157	0.8	2.21
ARL5A	218150_at	0.711217	0.921233	0.707853	0.11	4.41	0.52261	0.927534	0.814325	0.43	1.53	0.725809	0.905289	0.68395	0.08	5.71	0.801438	0.906896	0.915565	0.46	1.82
XIST	224588_at	0.273136	0.921233	0.76695	0.48	1.23	0.445545	0.917439	0.978047	0.92	1.04	0.205716	0.691135	0.733328	0.45	1.19	0.247696	0.629376	0.965944	0.91	1.02
PRKDC	208694_at	0.665352	0.921233	0.86997	0.46	1.64	0.605164	0.931996	1.07993	0.81	1.45	0.522405	0.905289	0.797605	0.4	1.59	0.200104	0.585133	1.21603	0.9	1.64
USP2	229337_at	0.474105	0.921233	1.74316	0.38	7.98	0.725184	0.968878	1.08621	0.68	1.72	0.0610274	0.394075	3.64252	0.94	14.09	0.644951	0.848375	1.11136	0.71	1.74
CEBPD	213006_at	0.665352	0.921233	0.86997	0.46	1.64	0.80158	0.973269	1.02582	0.84	1.25	0.522405	0.905289	0.797605	0.4	1.59	0.879353	0.951391	0.98347	0.79	1.22
RAB2A	208734_x_at	0.24326	0.921233	0.593861	0.25	1.43	0.664187	0.941795	0.905296	0.58	1.42	0.287984	0.780348	0.610777	0.25	1.52	0.494955	0.758272	0.853816	0.54	1.34
ATP5L	207573_x_at	0.474105	0.921233	1.74316	0.38	7.98	0.564488	0.927534	1.25026	0.58	2.67	0.0610274	0.394075	3.64252	0.94	14.09	0.112832	0.445511	1.87958	0.86	4.1
G2E3	223255_at	0.462687	0.921233	1.30853	0.64	2.68	0.362527	0.864468	1.14401	0.86	1.53	0.0473132	0.394075	2.05437	1.01	4.18	0.0632638	0.346143	1.33934	0.98	1.82
PSMA3	201532_at	0.325967	0.921233	1.59434	0.63	4.04	0.491885	0.927534	1.16989	0.75	1.83	0.0748633	0.434434	2.33834	0.92	5.95	0.122045	0.457972	1.44267	0.91	2.3
MIPOL1	1552573_s_at	0.671553	0.921233	1.06056	0.81	1.39	0.0036903	0.235564	1.59847	1.16	2.19	0.302593	0.783061	1.15266	0.88	1.51	0.00021437	0.0384379	1.97226	1.38	2.83
TJAP1	47608_at	0.376101	0.921233	1.66306	0.54	5.13	0.639019	0.937717	1.20607	0.55	2.64	0.387881	0.850618	1.71682	0.5	5.85	0.519618	0.768133	1.28977	0.59	2.8
CDK4	202246_s_at	0.52929	0.921233	0.786641	0.37	1.66	0.853185	0.973269	1.04148	0.68	1.6	0.711528	0.905289	0.855644	0.37	1.95	0.620944	0.843339	1.13014	0.7	1.84
ERICH1	1563315_s_at	0.666269	0.921233	0.82628	0.35	1.97	0.224371	0.748257	0.635738	0.31	1.32	0.690904	0.905289	0.821956	0.31	2.16	0.355248	0.704073	0.687202	0.31	1.52
DLAT	211150_s_at	0.751558	0.921233	1.30712	0.25	6.86	0.00547915	0.253324	1.6654	1.16	2.39	0.188214	0.649422	2.70542	0.61	11.91	0.00129831	0.0460205	1.84928	1.27	2.69
FAM91A1	226294_x_at	0.464717	0.921233	0.760552	0.37	1.58	0.813053	0.973269	1.05289	0.69	1.61	0.509023	0.905289	0.772844	0.36	1.66	0.585297	0.819374	1.12702	0.73	1.73
CWC15	223067_at	0.70594	0.921233	1.39448	0.25	7.84	0.567472	0.927534	0.794943	0.36	1.75	0.473269	0.905289	1.91844	0.32	11.38	0.711482	0.865072	0.855009	0.37	1.96
MED17	221517_s_at	0.608745	0.921233	1.54411	0.29	8.15	0.0129687	0.334077	1.9652	1.15	3.35	0.278366	0.780348	2.49502	0.48	13.03	0.00767214	0.101325	2.08131	1.21	3.57
CCDC59	218936_s_at	0.92235	0.970495	1.09753	0.17	7.13	0.919117	0.986796	1.02554	0.63	1.67	0.818434	0.905289	1.25172	0.18	8.51	0.637305	0.846423	1.12805	0.68	1.86
G2E3	223256_at	0.462687	0.921233	1.30853	0.64	2.68	0.307646	0.805205	1.19216	0.85	1.67	0.0473132	0.394075	2.05437	1.01	4.18	0.0522845	0.31256	1.4096	1	1.99
SETDB1	203155_at	0.205827	0.921233	1.47433	0.81	2.69	0.209314	0.748257	1.34593	0.85	2.14	0.283497	0.780348	1.40266	0.76	2.6	0.382609	0.704073	1.23646	0.77	1.99
YTHDF1	221741_s_at	0.158075	0.921233	0.558116	0.25	1.25	0.87271	0.974484	0.960517	0.59	1.57	0.135544	0.562969	0.545899	0.25	1.21	0.301017	0.684216	0.773103	0.47	1.26
VCPIP1	234988_at	0.656633	0.921233	0.845258	0.4	1.77	0.273604	0.783645	0.789946	0.52	1.2	0.823415	0.905289	0.913113	0.41	2.03	0.665419	0.858099	0.911179	0.6	1.39
BRMS1L	224484_s_at	0.587763	0.921233	1.10765	0.77	1.6	0.985987	0.996393	1.00199	0.8	1.25	0.120883	0.551326	1.33589	0.93	1.93	0.385362	0.704073	1.10484	0.88	1.38
GPANK1	225472_at	0.546811	0.921233	1.53988	0.38	6.27	0.180712	0.729156	1.53212	0.82	2.86	0.492439	0.905289	1.76106	0.35	8.86	0.0954153	0.409367	1.79701	0.9	3.58
YARS2	218470_at	0.691887	0.921233	0.818665	0.3	2.2	0.636454	0.937717	1.1075	0.73	1.69	0.399884	0.855618	0.628205	0.21	1.85	0.646803	0.848375	1.1096	0.71	1.73
RDX	212397_at	0.399434	0.921233	1.9265	0.42	8.85	0.123336	0.638347	1.47749	0.9	2.43	0.0266795	0.394075	4.46351	1.19	16.76	0.00951718	0.12047	2.0508	1.19	3.53
MRPL9	209609_s_at	0.155425	0.921233	1.56518	0.84	2.9	0.0284915	0.398343	1.62745	1.05	2.52	0.327864	0.826132	1.38149	0.72	2.64	0.0218497	0.190191	1.67173	1.08	2.59
G2E3	223254_s_at	0.462687	0.921233	1.30853	0.64	2.68	0.846951	0.973269	1.02433	0.8	1.31	0.0473132	0.394075	2.05437	1.01	4.18	0.168673	0.532674	1.20316	0.92	1.57
DPM1	202673_at	0.13409	0.921233	0.429158	0.14	1.3	0.618603	0.931996	0.885824	0.55	1.43	0.39925	0.855618	0.611259	0.19	1.92	0.918576	0.968948	0.975035	0.6	1.58
LYPLA1	212449_s_at	0.594022	0.921233	0.784741	0.32	1.91	0.509312	0.927534	1.14271	0.77	1.7	0.507967	0.905289	0.727679	0.28	1.87	0.8085	0.906896	1.04975	0.71	1.55
TADA1	225455_at	0.219799	0.921233	1.77851	0.71	4.46	0.15717	0.716618	1.38716	0.88	2.18	0.815445	0.905289	1.153	0.35	3.81	0.387118	0.704073	1.24105	0.76	2.02
ALKBH5	234302_s_at	0.263196	0.921233	0.518206	0.16	1.64	0.549084	0.927534	0.826154	0.44	1.54	0.511588	0.905289	0.681268	0.22	2.14	0.905654	0.962882	0.962876	0.52	1.8
MAPK1IP1L	212644_s_at	0.462979	0.921233	1.43674	0.55	3.78	0.0140754	0.334077	1.93178	1.14	3.27	0.10888	0.551326	2.19996	0.84	5.77	0.00280195	0.0663134	2.45516	1.36	4.42
PUS3	221277_s_at	0.322887	0.921233	2.06702	0.49	8.72	0.218739	0.748257	1.48519	0.79	2.79	0.0410899	0.394075	3.81141	1.06	13.76	0.0405538	0.267795	2.01509	1.03	3.94
ANKRD49	219069_at	0.633836	0.921233	1.50113	0.28	7.99	0.921709	0.986796	0.961757	0.44	2.09	0.296891	0.783061	2.42499	0.46	12.81	0.640894	0.846423	0.83317	0.39	1.79
TAF2	209523_at	0.729552	0.921233	0.885148	0.44	1.77	0.813273	0.973269	1.04491	0.73	1.5	0.750397	0.905289	0.88402	0.41	1.89	0.346603	0.698679	1.19383	0.83	1.73
TBC1D15	230072_at	0.723165	0.921233	0.777924	0.19	3.12	0.782782	0.973269	0.930324	0.56	1.55	0.631934	0.905289	0.692341	0.15	3.12	0.428528	0.727985	0.797474	0.46	1.4
CES2	209667_at	0.0813624	0.921233	0.354868	0.11	1.14	0.0902711	0.608233	0.690719	0.45	1.06	0.0547469	0.394075	0.304933	0.09	1.02	0.0353702	0.241907	0.614249	0.39	0.97
PTS	209694_at	0.777066	0.921233	1.27227	0.24	6.74	0.57171	0.927534	1.11775	0.76	1.64	0.183898	0.649422	2.73291	0.62	12.04	0.275818	0.6535	1.26133	0.83	1.91
SPOPL	225659_at	0.542435	0.921233	1.61807	0.34	7.61	0.0909763	0.608233	1.49531	0.94	2.38	0.331391	0.82956	2.29156	0.43	12.21	0.226828	0.616222	1.36198	0.83	2.25
IMPAD1	224743_at	0.514108	0.921233	0.769039	0.35	1.69	0.306337	0.805205	0.818188	0.56	1.2	0.460177	0.905086	0.733325	0.32	1.67	0.200137	0.585133	0.765532	0.51	1.15
RUFY1	218243_at	0.912888	0.970495	1.06361	0.35	3.21	0.193033	0.729156	1.47788	0.82	2.66	0.423403	0.886138	0.635787	0.21	1.93	0.946239	0.981388	1.02181	0.55	1.91
RAB6A	201047_x_at	0.106558	0.921233	3.26412	0.78	13.73	0.274965	0.783645	1.49891	0.72	3.1	0.00638759	0.394075	6.21752	1.67	23.12	0.0564475	0.327566	2.11709	0.98	4.58
TMEM55B	225287_s_at	0.976181	0.987987	0.982486	0.31	3.13	0.0881025	0.608233	0.571367	0.3	1.09	0.608172	0.905289	1.3506	0.43	4.26	0.39663	0.70661	0.763441	0.41	1.43
TATDN1	223231_at	0.400104	0.921233	0.725989	0.34	1.53	0.868795	0.973617	0.970485	0.68	1.38	0.450208	0.905086	0.742319	0.34	1.61	0.688838	0.863954	1.0754	0.75	1.53
NAP1L1	1556121_at	0.528023	0.921233	1.67272	0.34	8.27	0.648936	0.94041	0.91995	0.64	1.32	0.620773	0.905289	1.53888	0.28	8.49	0.67775	0.863954	0.923693	0.64	1.34
LAPTM4B	208029_s_at	0.394308	0.921233	0.731674	0.36	1.5	0.768169	0.973269	0.960248	0.73	1.26	0.381104	0.850618	0.712795	0.33	1.52	0.659379	0.85608	0.937892	0.71	1.25
CSE1L	210766_s_at	0.110131	0.921233	0.445399	0.17	1.2	0.581222	0.927534	1.09447	0.79	1.51	0.231893	0.691852	0.528459	0.19	1.5	0.244291	0.629376	1.2251	0.87	1.72
SSBP4	229269_x_at	0.265938	0.921233	0.500989	0.15	1.69	0.531238	0.927534	0.85989	0.54	1.38	0.170653	0.640784	0.406141	0.11	1.47	0.742186	0.880053	0.918158	0.55	1.53
MTMR2	214649_s_at	0.72621	0.921233	1.38706	0.22	8.66	0.00138262	0.176514	1.80658	1.26	2.6	0.46129	0.905086	2.0287	0.31	13.32	0.000636517	0.0384379	1.92313	1.32	2.8
TERF1	203449_s_at	0.401537	0.921233	0.735407	0.36	1.51	0.749483	0.973269	1.07633	0.69	1.69	0.496358	0.905289	0.775546	0.37	1.61	0.515754	0.768133	1.16772	0.73	1.86
IFT46	218483_s_at	0.474105	0.921233	1.74316	0.38	7.98	0.309047	0.805205	1.37266	0.75	2.53	0.0610274	0.394075	3.64252	0.94	14.09	0.093946	0.409367	1.70148	0.91	3.17
SLC36A4	230874_at	0.496462	0.921233	1.82308	0.32	10.29	0.296069	0.792968	1.16341	0.88	1.55	0.170231	0.640784	3.12332	0.61	15.9	0.103647	0.426847	1.26617	0.95	1.68
TMX1	209476_at	0.776692	0.921233	1.147	0.44	2.96	0.341992	0.845156	1.24729	0.79	1.97	0.119374	0.551326	2.04262	0.83	5.02	0.0229947	0.195711	1.77838	1.08	2.92
LRR1	235113_at	0.78029	0.921233	0.870822	0.33	2.3	0.673405	0.941795	1.06419	0.8	1.42	0.309609	0.79584	1.64999	0.63	4.34	0.0797963	0.387486	1.30785	0.97	1.77
CHEK1	205394_at	0.322887	0.921233	2.06702	0.49	8.72	0.0209967	0.349641	1.24687	1.03	1.5	0.0410899	0.394075	3.81141	1.06	13.76	0.00070252	0.0384379	1.40915	1.16	1.72
ALKBH5	1553101_a_at	0.263196	0.921233	0.518206	0.16	1.64	0.7991	0.973269	1.07625	0.61	1.9	0.511588	0.905289	0.681268	0.22	2.14	0.517462	0.768133	1.20432	0.69	2.11
PFDN4	205362_s_at	0.426222	0.921233	0.649609	0.22	1.88	0.848962	0.973269	1.04003	0.69	1.56	0.525078	0.905289	0.696462	0.23	2.13	0.595012	0.82869	1.11418	0.75	1.66
ARNT	218221_at	0.205827	0.921233	1.47433	0.81	2.69	0.0999112	0.611423	1.53137	0.92	2.54	0.283497	0.780348	1.40266	0.76	2.6	0.22686	0.616222	1.38061	0.82	2.33
ANKRD27	221522_at	0.697524	0.921233	1.15182	0.56	2.35	0.224673	0.748257	1.26715	0.86	1.86	0.7527	0.905289	1.12941	0.53	2.41	0.315056	0.684216	1.22727	0.82	1.83
C8orf42	242387_at	0.748131	0.921233	0.88075	0.41	1.91	0.210346	0.748257	0.75045	0.48	1.18	0.794579	0.905289	0.892994	0.38	2.09	0.070344	0.373766	0.634915	0.39	1.04
ATP6V1H	221504_s_at	0.594022	0.921233	0.784741	0.32	1.91	0.864723	0.973617	1.04378	0.64	1.71	0.507967	0.905289	0.727679	0.28	1.87	0.864879	0.943729	1.04147	0.65	1.66
G2E3	223257_at	0.462687	0.921233	1.30853	0.64	2.68	0.591686	0.931996	1.07125	0.83	1.38	0.0473132	0.394075	2.05437	1.01	4.18	0.0753925	0.387486	1.27316	0.98	1.66
VDAC3	208846_s_at	0.665514	0.921233	0.837595	0.38	1.87	0.221563	0.748257	1.2923	0.86	1.95	0.762516	0.905289	0.873352	0.36	2.1	0.189789	0.569318	1.34807	0.86	2.11
XPOT	227117_at	0.671242	0.921233	1.26628	0.43	3.77	0.412744	0.891514	1.15914	0.81	1.65	0.760332	0.905289	1.19063	0.39	3.65	0.475696	0.746687	1.14512	0.79	1.66
EGFR	211607_x_at	0.418269	0.921233	1.10034	0.87	1.39	0.523226	0.927534	0.905865	0.67	1.23	0.390843	0.850618	1.11186	0.87	1.42	0.469645	0.746687	0.889839	0.65	1.22
RNF214	227114_at	0.493106	0.921233	1.73165	0.36	8.32	0.924742	0.986796	0.961856	0.43	2.16	0.113255	0.551326	3.18376	0.76	13.35	0.573079	0.81446	0.778366	0.33	1.86
NFIB	211467_s_at	0.223163	0.921233	1.79571	0.7	4.61	0.450789	0.917542	1.13432	0.82	1.57	0.109908	0.551326	1.99661	0.86	4.66	0.544035	0.786285	1.11011	0.79	1.56
FNTA	200090_at	0.832566	0.949026	0.891732	0.31	2.58	0.811866	0.973269	1.06992	0.61	1.87	0.607058	0.905289	0.740527	0.24	2.33	0.948077	0.981388	1.01861	0.58	1.77
PPHLN1	225073_at	0.455631	0.921233	0.521435	0.09	2.88	0.789301	0.973269	1.07836	0.62	1.88	0.689132	0.905289	0.689303	0.11	4.27	0.469384	0.746687	1.22719	0.7	2.14
C11orf57	222588_s_at	0.751558	0.921233	1.30712	0.25	6.86	0.139087	0.665194	1.66512	0.85	3.27	0.188214	0.649422	2.70542	0.61	11.91	0.0498332	0.31256	1.93031	1	3.72
PI4KB	206139_at	0.339141	0.921233	1.36229	0.72	2.57	0.264865	0.783645	1.39761	0.78	2.52	0.464778	0.905086	1.27628	0.66	2.45	0.263575	0.644246	1.40284	0.77	2.54
MTMR2	203211_s_at	0.72621	0.921233	1.38706	0.22	8.66	0.0148285	0.334077	1.64686	1.1	2.46	0.46129	0.905086	2.0287	0.31	13.32	0.00572307	0.0876774	1.81766	1.19	2.78
CHEK1	238075_at	0.322887	0.921233	2.06702	0.49	8.72	0.0312018	0.398343	1.29279	1.02	1.63	0.0410899	0.394075	3.81141	1.06	13.76	0.000426744	0.0384379	1.5579	1.22	1.99
STAU1	211505_s_at	0.110131	0.921233	0.445399	0.17	1.2	0.598177	0.931996	0.879677	0.55	1.42	0.231893	0.691852	0.528459	0.19	1.5	0.602165	0.82967	0.877847	0.54	1.43
FAM60A	223038_s_at	0.579234	0.921233	0.816247	0.4	1.67	0.24209	0.760889	1.1402	0.92	1.42	0.387247	0.850618	0.698854	0.31	1.57	0.318222	0.684713	1.12625	0.89	1.42
TMEM5	204808_s_at	0.849979	0.957409	0.886465	0.25	3.09	0.222388	0.748257	1.34027	0.84	2.15	0.75224	0.905289	0.811277	0.22	2.97	0.242627	0.629376	1.32343	0.83	2.12
CCHCR1	209698_at	0.691078	0.921233	1.33787	0.32	5.62	0.438404	0.914593	1.21317	0.74	1.98	0.650583	0.905289	1.46515	0.28	7.65	0.311804	0.684216	1.31282	0.77	2.22
MRPS28	219819_s_at	0.545997	0.921233	0.779423	0.35	1.75	0.839225	0.973269	0.965922	0.69	1.35	0.768335	0.905289	0.881593	0.38	2.04	0.806719	0.906896	1.04225	0.75	1.45
SSBP4	223226_x_at	0.265938	0.921233	0.500989	0.15	1.69	0.570596	0.927534	0.851046	0.49	1.49	0.170653	0.640784	0.406141	0.11	1.47	0.706051	0.863954	0.889157	0.48	1.64
RNMT	202683_s_at	0.658387	0.921233	1.33023	0.38	4.71	0.473421	0.927534	1.21569	0.71	2.07	0.638414	0.905289	1.34326	0.39	4.6	0.316204	0.684216	1.31425	0.77	2.24
METTL3	209265_s_at	0.505184	0.921233	0.633247	0.17	2.43	0.119418	0.638347	0.686904	0.43	1.1	0.812646	0.905289	1.17671	0.31	4.52	0.380688	0.704073	0.799381	0.48	1.32
CDC5L	209056_s_at	0.0417066	0.921233	3.29301	1.05	10.37	0.120152	0.638347	1.50822	0.9	2.53	0.0202843	0.394075	4.04326	1.24	13.15	0.121031	0.457972	1.49441	0.9	2.48
CHEK1	205393_s_at	0.322887	0.921233	2.06702	0.49	8.72	0.0203413	0.349641	1.25535	1.04	1.52	0.0410899	0.394075	3.81141	1.06	13.76	0.000688892	0.0384379	1.42338	1.16	1.75
CABLES1	225531_at	0.539254	0.921233	0.733037	0.27	1.98	0.133918	0.665194	0.781432	0.57	1.08	0.46426	0.905086	0.692245	0.26	1.85	0.0484516	0.309283	0.702723	0.5	1
NFRKB	213028_at	0.330137	0.921233	2.09446	0.47	9.27	0.560741	0.927534	1.2211	0.62	2.39	0.0896833	0.505128	3.38836	0.83	13.87	0.313298	0.684216	1.4105	0.72	2.75
ALG10	1552306_at	0.917103	0.970495	0.951815	0.38	2.41	0.52468	0.927534	1.09131	0.83	1.43	0.626791	0.905289	0.776153	0.28	2.16	0.206094	0.587929	1.19594	0.91	1.58
TWF1	201745_at	0.931825	0.975107	1.08061	0.18	6.38	0.231436	0.756407	1.30343	0.84	2.01	0.877823	0.914813	1.15959	0.18	7.66	0.105852	0.431291	1.46496	0.92	2.33
OSGEP	209450_at	0.976181	0.987987	0.982486	0.31	3.13	0.920912	0.986796	0.97393	0.58	1.64	0.608172	0.905289	1.3506	0.43	4.26	0.406764	0.707224	1.24686	0.74	2.1
GALNT10	207357_s_at	0.278183	0.921233	0.512073	0.15	1.72	0.439387	0.914593	0.903487	0.7	1.17	0.137681	0.562969	0.389861	0.11	1.35	0.335212	0.695911	0.878657	0.68	1.14
RAB2A	208731_at	0.24326	0.921233	0.593861	0.25	1.43	0.946626	0.993309	1.01631	0.63	1.63	0.287984	0.780348	0.610777	0.25	1.52	0.580345	0.817176	0.870802	0.53	1.42
DYRK1A	209033_s_at	0.634946	0.921233	0.705135	0.17	2.98	0.270701	0.783645	1.40921	0.77	2.59	0.379337	0.850618	0.511111	0.11	2.28	0.462785	0.746687	1.26817	0.67	2.39
GXYLT1	226868_at	0.324087	0.921233	0.471224	0.11	2.1	0.959163	0.994424	1.01069	0.67	1.52	0.489043	0.905289	0.567996	0.11	2.82	0.958931	0.983433	0.98909	0.65	1.5
IMPA1	203011_at	0.857419	0.957409	1.07647	0.48	2.41	0.192023	0.729156	1.28966	0.88	1.89	0.59866	0.905289	1.24445	0.55	2.81	0.0695698	0.373766	1.43756	0.97	2.13
AP3M2	203410_at	0.244297	0.921233	0.596149	0.25	1.42	0.28645	0.783645	1.27301	0.82	1.98	0.245481	0.723224	0.573147	0.22	1.47	0.248135	0.629376	1.30209	0.83	2.04
ARNTL2	220658_s_at	0.761178	0.921233	0.913299	0.51	1.64	0.48914	0.927534	1.07192	0.88	1.31	0.671067	0.905289	0.870109	0.46	1.65	0.130731	0.466183	1.17171	0.95	1.44
YEATS4	218911_at	0.463445	0.921233	1.19165	0.75	1.9	0.324545	0.828976	1.17522	0.85	1.62	0.67302	0.905289	1.10081	0.7	1.72	0.0970158	0.409367	1.29562	0.95	1.76
AARS2	231845_at	0.380887	0.921233	1.65001	0.54	5.06	0.119117	0.638347	1.53057	0.9	2.61	0.386407	0.850618	1.71669	0.51	5.83	0.0617919	0.345455	1.64253	0.98	2.76
ZBTB48	205025_at	0.425102	0.921233	0.633127	0.21	1.95	0.745287	0.973269	1.09315	0.64	1.87	0.390585	0.850618	0.566401	0.15	2.07	0.941786	0.980174	1.0223	0.57	1.85
NPAT	209798_at	0.328049	0.921233	2.34534	0.42	12.94	0.991231	0.998829	0.996473	0.53	1.87	0.0503119	0.394075	4.9054	1	24.12	0.551361	0.790903	1.19814	0.66	2.17
ARFGEF2	218098_at	0.0623086	0.921233	0.383263	0.14	1.05	0.28611	0.783645	0.779353	0.49	1.23	0.146065	0.570845	0.458949	0.16	1.31	0.769097	0.88761	0.930521	0.58	1.5
SS18L1	213140_s_at	0.11333	0.921233	0.501651	0.21	1.18	0.996351	0.998829	1.00088	0.69	1.46	0.143926	0.570845	0.527125	0.22	1.24	0.960324	0.983433	1.00982	0.69	1.48
HECTD1	224481_s_at	0.506667	0.921233	1.27408	0.62	2.6	0.567529	0.927534	1.15466	0.71	1.89	0.0560638	0.394075	2.00275	0.98	4.08	0.176763	0.550408	1.43027	0.85	2.4
NUBPL	220176_at	0.462367	0.921233	1.30465	0.64	2.65	0.0587833	0.565165	1.40218	0.99	1.99	0.0524502	0.394075	2.02055	0.99	4.11	0.00740307	0.101325	1.67275	1.15	2.44
USP15	210681_s_at	0.901124	0.966752	1.07957	0.32	3.61	0.479111	0.927534	1.20837	0.72	2.04	0.850924	0.905289	0.88596	0.25	3.13	0.276415	0.6535	1.34007	0.79	2.27
NAP1L1	208754_s_at	0.528023	0.921233	1.67272	0.34	8.27	0.89517	0.986796	0.973562	0.65	1.45	0.620773	0.905289	1.53888	0.28	8.49	0.909696	0.962882	0.976851	0.65	1.46
METTL17	218366_x_at	0.285852	0.921233	0.475034	0.12	1.86	0.13957	0.665194	0.675793	0.4	1.14	0.870531	0.914813	0.892065	0.23	3.52	0.208768	0.587929	0.711777	0.42	1.21
ABCF1	200045_at	0.600591	0.921233	1.46228	0.35	6.07	0.939716	0.988888	1.02195	0.58	1.79	0.529679	0.905289	1.69005	0.33	8.68	0.855862	0.94194	1.05419	0.6	1.86
SLU7	231718_at	0.769874	0.921233	1.21187	0.33	4.39	0.952246	0.99376	0.983329	0.57	1.7	0.946989	0.95097	0.95721	0.26	3.47	0.8592	0.942904	0.953658	0.56	1.61
RAB21	239329_at	0.675244	0.921233	0.740538	0.18	3.02	0.293512	0.791655	1.26283	0.82	1.95	0.583586	0.905289	0.652882	0.14	3	0.48769	0.750141	1.16457	0.76	1.79

## Sheet: S7C Squamous-ca
Suppl. Table 7C: Cox regression model for gene copy number and gene expression in the total NSCLC cohort (n=62) for the 626 high correlation probe sets. In the multivariate in Cox regression model the gene copy number and gene expression are adjusted for the variables age (< 70 versus ≥ 70 years), patient performance status (0 versus I-III) and tumor stage (I versus II-IV). The p-values were adju…
		CN (univariat)					GE (univariat)					CN (multivariat)					GE (multivariat)
genesymbol	probe set	p-value	adj p-value	HR	CI lower	CI upper	p-value	adj p-value	HR	CI lower	CI upper	p-value	adj p-value	HR	CI lower	CI upper	p-value	adj p-value	HR	CI lower	CI upper
PACS2	212778_at	0.389034	0.87784	0.853748	0.6	1.22	0.922215	0.993177	0.983645	0.71	1.37	0.604001	0.875242	0.907441	0.63	1.31	0.540715	0.95302	1.11453	0.79	1.58
CDCA4	218399_s_at	0.389034	0.87784	0.853748	0.6	1.22	0.997194	0.997194	0.999445	0.73	1.36	0.604001	0.875242	0.907441	0.63	1.31	0.704728	0.95302	1.06791	0.76	1.5
BTBD6	225389_at	0.389034	0.87784	0.853748	0.6	1.22	0.637402	0.993177	0.910356	0.62	1.35	0.604001	0.875242	0.907441	0.63	1.31	0.828824	0.969198	0.953028	0.62	1.47
MTA1	211783_s_at	0.389034	0.87784	0.853748	0.6	1.22	0.790158	0.993177	1.04276	0.77	1.42	0.604001	0.875242	0.907441	0.63	1.31	0.552686	0.95302	1.10915	0.79	1.56
PACS2	34406_at	0.389034	0.87784	0.853748	0.6	1.22	0.902577	0.993177	0.977163	0.68	1.41	0.604001	0.875242	0.907441	0.63	1.31	0.654547	0.95302	1.09399	0.74	1.62
JAG2	209784_s_at	0.389034	0.87784	0.853748	0.6	1.22	0.924907	0.993177	1.01357	0.77	1.34	0.604001	0.875242	0.907441	0.63	1.31	0.50778	0.95302	1.10722	0.82	1.5
VCP	208648_at	0.513311	0.934175	1.13406	0.78	1.65	0.778059	0.993177	1.06375	0.69	1.63	0.653006	0.904384	1.08997	0.75	1.59	0.726252	0.95302	1.07874	0.71	1.65
JAG2	32137_at	0.389034	0.87784	0.853748	0.6	1.22	0.824157	0.993177	1.03363	0.77	1.38	0.604001	0.875242	0.907441	0.63	1.31	0.401238	0.95302	1.14484	0.83	1.57
CDC37L1	219343_at	0.125462	0.872577	1.42667	0.91	2.25	0.149979	0.993177	1.37927	0.89	2.14	0.256455	0.769571	1.29678	0.83	2.03	0.101114	0.93455	1.40863	0.94	2.12
BRF1	1552399_a_at	0.389034	0.87784	0.853748	0.6	1.22	0.67141	0.993177	0.886032	0.51	1.55	0.604001	0.875242	0.907441	0.63	1.31	0.91793	0.986472	0.968621	0.53	1.78
NDUFS1	203039_s_at	0.894942	0.993768	1.04073	0.58	1.88	0.978757	0.993177	0.993348	0.61	1.62	0.714793	0.92872	1.12019	0.61	2.06	0.984832	0.99285	1.00507	0.6	1.69
KIAA1432	226221_at	0.11368	0.872577	1.43998	0.92	2.26	0.0898671	0.993177	1.55662	0.93	2.6	0.228244	0.769571	1.31351	0.84	2.05	0.0561709	0.93455	1.55737	0.99	2.45
CDC37L1	235787_at	0.125462	0.872577	1.42667	0.91	2.25	0.196226	0.993177	1.34553	0.86	2.11	0.256455	0.769571	1.29678	0.83	2.03	0.292131	0.937816	1.26425	0.82	1.96
ORC2	204853_at	0.807482	0.971765	0.894452	0.36	2.19	0.987494	0.993844	1.0039	0.62	1.63	0.80845	0.92872	0.884171	0.33	2.39	0.759331	0.95302	0.918518	0.53	1.58
FASTKD2	216996_s_at	0.978918	0.993768	1.00812	0.55	1.84	0.929312	0.993177	1.02261	0.62	1.68	0.830574	0.931917	1.07118	0.57	2.01	0.715714	0.95302	1.1061	0.64	1.9
CNOT2	217798_at	0.65907	0.966697	0.888369	0.53	1.5	0.949696	0.993177	0.983096	0.58	1.67	0.798831	0.92872	0.932611	0.55	1.59	0.988579	0.994235	1.00409	0.57	1.76
CNOT2	222182_s_at	0.65907	0.966697	0.888369	0.53	1.5	0.77964	0.993177	1.07281	0.66	1.76	0.798831	0.92872	0.932611	0.55	1.59	0.684577	0.95302	1.11609	0.66	1.9
KIAA1432	226222_at	0.11368	0.872577	1.43998	0.92	2.26	0.366694	0.993177	1.26717	0.76	2.12	0.228244	0.769571	1.31351	0.84	2.05	0.253307	0.93455	1.32004	0.82	2.13
FANCG	203564_at	0.513311	0.934175	1.13406	0.78	1.65	0.455027	0.993177	1.12175	0.83	1.52	0.653006	0.904384	1.08997	0.75	1.59	0.504707	0.95302	1.10776	0.82	1.5
PLGRKT	218992_at	0.117357	0.872577	1.43747	0.91	2.26	0.285361	0.993177	1.21775	0.85	1.75	0.242905	0.769571	1.30628	0.83	2.05	0.155427	0.93455	1.28424	0.91	1.81
PIGO	209998_at	0.513311	0.934175	1.13406	0.78	1.65	0.40686	0.993177	1.14589	0.83	1.58	0.653006	0.904384	1.08997	0.75	1.59	0.443639	0.95302	1.1338	0.82	1.56
PPAPDC2	227385_at	0.125462	0.872577	1.42667	0.91	2.25	0.538793	0.993177	1.16637	0.71	1.91	0.256455	0.769571	1.29678	0.83	2.03	0.652134	0.95302	1.11475	0.7	1.79
PACS2	1555824_a_at	0.389034	0.87784	0.853748	0.6	1.22	0.854358	0.993177	1.04321	0.66	1.64	0.604001	0.875242	0.907441	0.63	1.31	0.477617	0.95302	1.19848	0.73	1.98
BAG4	228189_at	0.41019	0.87784	0.85572	0.59	1.24	0.924632	0.993177	0.987157	0.76	1.29	0.754985	0.92872	0.940778	0.64	1.38	0.603133	0.95302	1.08291	0.8	1.46
FAM117B	226431_at	0.778591	0.971765	0.87644	0.35	2.2	0.118182	0.993177	0.774299	0.56	1.07	0.80601	0.92872	0.882238	0.32	2.4	0.0773257	0.93455	0.734198	0.52	1.03
RNF38	218528_s_at	0.252754	0.87784	1.28482	0.84	1.97	0.379667	0.993177	0.744743	0.39	1.44	0.311307	0.769571	1.24318	0.82	1.89	0.606323	0.95302	0.848364	0.45	1.59
KAT6A	226547_at	0.939323	0.993768	0.983472	0.64	1.51	0.669104	0.993177	1.09427	0.72	1.65	0.545452	0.84518	1.14875	0.73	1.8	0.22412	0.93455	1.31889	0.84	2.06
CDC37L1	228561_at	0.125462	0.872577	1.42667	0.91	2.25	0.353818	0.993177	1.23855	0.79	1.95	0.256455	0.769571	1.29678	0.83	2.03	0.410049	0.95302	1.22143	0.76	1.97
IKBKB	209342_s_at	0.979481	0.993768	1.00558	0.66	1.54	0.35624	0.993177	1.23443	0.79	1.93	0.520472	0.826944	1.15778	0.74	1.81	0.180165	0.93455	1.3922	0.86	2.26
LSM1	203534_at	0.41019	0.87784	0.85572	0.59	1.24	0.876909	0.993177	0.974754	0.71	1.35	0.754985	0.92872	0.940778	0.64	1.38	0.635962	0.95302	1.08858	0.77	1.55
SUMO1	211069_s_at	0.793192	0.971765	0.885205	0.36	2.2	0.7908	0.993177	0.914919	0.47	1.76	0.817282	0.92872	0.88906	0.33	2.41	0.527707	0.95302	0.793298	0.39	1.63
YEATS4	218911_at	0.426299	0.87784	1.15562	0.81	1.65	0.846531	0.993177	0.961942	0.65	1.42	0.460486	0.769571	1.13347	0.81	1.58	0.679621	0.95302	0.916856	0.61	1.38
VCP	208649_s_at	0.513311	0.934175	1.13406	0.78	1.65	0.812421	0.993177	1.05904	0.66	1.7	0.653006	0.904384	1.08997	0.75	1.59	0.554283	0.95302	1.14825	0.73	1.82
TESK1	204106_at	0.586118	0.940794	1.13393	0.72	1.78	0.358246	0.993177	1.27805	0.76	2.16	0.62351	0.89174	1.1149	0.72	1.72	0.222598	0.93455	1.36317	0.83	2.24
SUMO1	208761_s_at	0.793192	0.971765	0.885205	0.36	2.2	0.484581	0.993177	0.808239	0.44	1.47	0.817282	0.92872	0.88906	0.33	2.41	0.228107	0.93455	0.66787	0.35	1.29
STOML2	215416_s_at	0.513311	0.934175	1.13406	0.78	1.65	0.470613	0.993177	1.12875	0.81	1.57	0.653006	0.904384	1.08997	0.75	1.59	0.413916	0.95302	1.14536	0.83	1.59
NIF3L1	218133_s_at	0.807482	0.971765	0.894452	0.36	2.19	0.4083	0.993177	0.769099	0.41	1.43	0.80845	0.92872	0.884171	0.33	2.39	0.172594	0.93455	0.627702	0.32	1.23
FNTA	209471_s_at	0.400724	0.87784	1.20402	0.78	1.86	0.183833	0.993177	1.34409	0.87	2.08	0.0819822	0.769571	1.49939	0.95	2.37	0.0681164	0.93455	1.57248	0.97	2.56
UBAP2	221839_s_at	0.661039	0.966697	1.12329	0.67	1.89	0.246004	0.993177	1.22758	0.87	1.74	0.799345	0.92872	1.06999	0.64	1.8	0.286635	0.93455	1.20882	0.85	1.71
WRNIP1	222489_s_at	0.910081	0.993768	0.940251	0.32	2.74	0.873077	0.993177	1.05033	0.58	1.92	0.983799	0.983799	0.988574	0.33	3	0.873733	0.970039	1.04938	0.58	1.9
WDR12	218512_at	0.778591	0.971765	0.87644	0.35	2.2	0.660701	0.993177	0.901573	0.57	1.43	0.80601	0.92872	0.882238	0.32	2.4	0.726097	0.95302	0.916439	0.56	1.49
RNMT	202683_s_at	0.188899	0.872577	0.48646	0.17	1.43	0.506396	0.993177	0.828619	0.48	1.44	0.378229	0.769571	0.584216	0.18	1.93	0.604966	0.95302	0.850033	0.46	1.57
NUDT14	231914_at	0.389034	0.87784	0.853748	0.6	1.22	0.740381	0.993177	1.06103	0.75	1.51	0.604001	0.875242	0.907441	0.63	1.31	0.589961	0.95302	1.11479	0.75	1.66
TYW5	235181_at	0.766441	0.971765	0.881279	0.38	2.03	0.88515	0.993177	1.04516	0.57	1.9	0.782666	0.92872	0.882275	0.36	2.15	0.945846	0.990345	1.02295	0.53	1.97
ALS2	226291_at	0.793192	0.971765	0.885205	0.36	2.2	0.853627	0.993177	0.953972	0.58	1.57	0.817282	0.92872	0.88906	0.33	2.41	0.69157	0.95302	0.896491	0.52	1.54
RPP25L	225403_at	0.789876	0.971765	1.06984	0.65	1.76	0.929309	0.993177	1.02062	0.65	1.6	0.890496	0.941639	1.03595	0.63	1.71	0.765433	0.954504	1.07114	0.68	1.68
AK3	224151_s_at	0.125462	0.872577	1.42667	0.91	2.25	0.876659	0.993177	1.02927	0.71	1.48	0.256455	0.769571	1.29678	0.83	2.03	0.827029	0.969198	0.957141	0.65	1.42
UBE2R2	223014_at	0.576097	0.94069	1.15533	0.7	1.92	0.855328	0.993177	1.05242	0.61	1.82	0.720251	0.92872	1.09901	0.66	1.84	0.791889	0.96542	1.07397	0.63	1.82
DCAF12	224789_at	0.937076	0.993768	1.02178	0.6	1.74	0.635866	0.993177	0.889416	0.55	1.44	0.967817	0.974041	0.989068	0.58	1.69	0.720479	0.95302	0.916028	0.57	1.48
GALT	203179_at	0.789876	0.971765	1.06984	0.65	1.76	0.682762	0.993177	1.09471	0.71	1.69	0.890496	0.941639	1.03595	0.63	1.71	0.572454	0.95302	1.13122	0.74	1.74
CLTA	204050_s_at	0.252754	0.87784	1.28482	0.84	1.97	0.358383	0.993177	1.27222	0.76	2.13	0.311307	0.769571	1.24318	0.82	1.89	0.227325	0.93455	1.36385	0.82	2.26
ICA1L	1554205_s_at	0.778591	0.971765	0.87644	0.35	2.2	0.883283	0.993177	1.05913	0.49	2.28	0.80601	0.92872	0.882238	0.32	2.4	0.6531	0.95302	1.2023	0.54	2.68
KCTD18	226493_at	0.772786	0.971765	0.874421	0.35	2.17	0.355307	0.993177	0.791093	0.48	1.3	0.77248	0.92872	0.862832	0.32	2.35	0.119725	0.93455	0.648842	0.38	1.12
MPP4	1552489_s_at	0.779319	0.971765	0.876875	0.35	2.2	0.572079	0.993177	0.90163	0.63	1.29	0.806887	0.92872	0.882549	0.32	2.4	0.75906	0.95302	0.944	0.65	1.36
ASH2L	209517_s_at	0.195562	0.872577	0.758689	0.5	1.15	0.798795	0.993177	0.95742	0.69	1.34	0.41201	0.769571	0.837166	0.55	1.28	0.747428	0.95302	1.05916	0.75	1.5
NUP107	218768_at	0.0768562	0.872577	1.44388	0.96	2.17	0.181516	0.993177	1.36727	0.86	2.16	0.161647	0.769571	1.32837	0.89	1.98	0.329874	0.95302	1.2546	0.79	1.98
UBAP2	219192_at	0.661039	0.966697	1.12329	0.67	1.89	0.164431	0.993177	1.27103	0.91	1.78	0.799345	0.92872	1.06999	0.64	1.8	0.238419	0.93455	1.23245	0.87	1.74
MCCC1	218440_at	0.233829	0.87784	0.845545	0.64	1.11	0.0375442	0.993177	0.715572	0.52	0.98	0.188474	0.769571	0.81385	0.6	1.11	0.0229534	0.93455	0.670273	0.47	0.95
CLTA	216295_s_at	0.252754	0.87784	1.28482	0.84	1.97	0.34786	0.993177	1.29036	0.76	2.2	0.311307	0.769571	1.24318	0.82	1.89	0.252134	0.93455	1.35962	0.8	2.3
RGP1	203169_at	0.561756	0.940266	1.15221	0.71	1.86	0.57603	0.993177	1.13448	0.73	1.77	0.596951	0.875242	1.1303	0.72	1.78	0.730813	0.95302	1.08218	0.69	1.7
C2orf69	238974_at	0.766441	0.971765	0.881279	0.38	2.03	0.51718	0.993177	0.843378	0.5	1.41	0.782666	0.92872	0.882275	0.36	2.15	0.400087	0.95302	0.79562	0.47	1.36
C2orf47	219176_at	0.794585	0.971765	0.896422	0.39	2.04	0.54851	0.993177	0.821426	0.43	1.56	0.812875	0.92872	0.899328	0.37	2.17	0.512121	0.95302	0.793962	0.4	1.58
WHSC1L1	222544_s_at	0.41019	0.87784	0.85572	0.59	1.24	0.907319	0.993177	0.983508	0.74	1.3	0.754985	0.92872	0.940778	0.64	1.38	0.708132	0.95302	1.05601	0.79	1.4
SUMO1	208762_at	0.793192	0.971765	0.885205	0.36	2.2	0.664454	0.993177	0.892971	0.54	1.49	0.817282	0.92872	0.88906	0.33	2.41	0.435633	0.95302	0.798958	0.45	1.4
HINT2	224415_s_at	0.561756	0.940266	1.15221	0.71	1.86	0.606356	0.993177	1.10659	0.75	1.63	0.596951	0.875242	1.1303	0.72	1.78	0.533612	0.95302	1.12817	0.77	1.65
FNTA	200090_at	0.400724	0.87784	1.20402	0.78	1.86	0.0750609	0.993177	1.58722	0.95	2.64	0.0819822	0.769571	1.49939	0.95	2.37	0.0178914	0.93455	2.00381	1.13	3.56
RNF170	220985_s_at	0.559229	0.940266	1.14654	0.72	1.81	0.0941	0.993177	1.38857	0.95	2.04	0.148232	0.769571	1.42362	0.88	2.3	0.0295185	0.93455	1.62205	1.05	2.51
WHSC1L1	238496_at	0.41019	0.87784	0.85572	0.59	1.24	0.737962	0.993177	0.961456	0.76	1.21	0.754985	0.92872	0.940778	0.64	1.38	0.917386	0.986472	0.986838	0.77	1.27
TYW5	235686_at	0.766441	0.971765	0.881279	0.38	2.03	0.924566	0.993177	1.02797	0.58	1.82	0.782666	0.92872	0.882275	0.36	2.15	0.876379	0.970039	0.94936	0.49	1.83
WHSC1L1	224076_s_at	0.41019	0.87784	0.85572	0.59	1.24	0.585621	0.993177	0.923246	0.69	1.23	0.754985	0.92872	0.940778	0.64	1.38	0.974895	0.99285	0.995148	0.74	1.35
MDM2	225160_x_at	0.0768562	0.872577	1.44388	0.96	2.17	0.849242	0.993177	1.063	0.57	2	0.161647	0.769571	1.32837	0.89	1.98	0.799844	0.968477	1.07882	0.6	1.94
KIAA0391	202713_s_at	0.984633	0.995567	1.00771	0.46	2.2	0.677635	0.993177	1.10998	0.68	1.82	0.356304	0.769571	1.45039	0.66	3.2	0.1834	0.93455	1.46303	0.84	2.56
BMPR2	210214_s_at	0.778591	0.971765	0.87644	0.35	2.2	0.801502	0.993177	0.941782	0.59	1.5	0.80601	0.92872	0.882238	0.32	2.4	0.727228	0.95302	0.917427	0.57	1.49
SIGMAR1	201692_at	0.789876	0.971765	1.06984	0.65	1.76	0.875076	0.993177	1.02992	0.71	1.49	0.890496	0.941639	1.03595	0.63	1.71	0.616939	0.95302	1.09397	0.77	1.56
GOLGA7	217819_at	0.620877	0.966697	1.22881	0.54	2.78	0.596606	0.993177	1.18045	0.64	2.18	0.201831	0.769571	1.75085	0.74	4.14	0.296365	0.939258	1.38882	0.75	2.57
RALGAPA1	234923_at	0.978015	0.993768	1.01128	0.46	2.25	0.935629	0.993177	1.01572	0.7	1.48	0.380751	0.769571	1.43079	0.64	3.19	0.659172	0.95302	1.09812	0.72	1.66
DTD2	1553801_a_at	0.769072	0.971765	0.875739	0.36	2.12	0.968222	0.993177	1.00657	0.73	1.39	0.622343	0.89174	1.24966	0.51	3.03	0.885147	0.975532	1.02826	0.7	1.5
GEMIN2	205063_at	0.969539	0.993768	0.986117	0.48	2.02	0.551583	0.993177	1.10928	0.79	1.56	0.453655	0.769571	1.3123	0.64	2.67	0.295917	0.939258	1.22283	0.84	1.78
CREB3	209432_s_at	0.561756	0.940266	1.15221	0.71	1.86	0.562749	0.993177	1.16221	0.7	1.93	0.596951	0.875242	1.1303	0.72	1.78	0.449276	0.95302	1.20967	0.74	1.98
TMEM8B	207839_s_at	0.256561	0.87784	1.28376	0.83	1.98	0.0610124	0.993177	1.78573	0.97	3.28	0.326883	0.769571	1.23898	0.81	1.9	0.0447647	0.93455	1.83072	1.01	3.3
TMEM237	1553956_at	0.779319	0.971765	0.876875	0.35	2.2	0.929157	0.993177	1.01926	0.67	1.55	0.806887	0.92872	0.882549	0.32	2.4	0.903631	0.986472	0.972049	0.61	1.54
GEMIN2	211115_x_at	0.969539	0.993768	0.986117	0.48	2.02	0.53667	0.993177	1.1499	0.74	1.79	0.453655	0.769571	1.3123	0.64	2.67	0.191316	0.93455	1.37751	0.85	2.23
AK3	224655_at	0.125462	0.872577	1.42667	0.91	2.25	0.514893	0.993177	1.19164	0.7	2.02	0.256455	0.769571	1.29678	0.83	2.03	0.496894	0.95302	1.20037	0.71	2.03
FAM117B	1553220_at	0.778591	0.971765	0.87644	0.35	2.2	0.114237	0.993177	0.799685	0.61	1.06	0.80601	0.92872	0.882238	0.32	2.4	0.0905342	0.93455	0.774447	0.58	1.04
CLTA	200960_x_at	0.252754	0.87784	1.28482	0.84	1.97	0.353797	0.993177	1.32096	0.73	2.38	0.311307	0.769571	1.24318	0.82	1.89	0.224681	0.93455	1.42795	0.8	2.54
SGOL2	230165_at	0.833022	0.985769	0.90957	0.38	2.2	0.767592	0.993177	0.944549	0.65	1.38	0.832885	0.931917	0.900686	0.34	2.38	0.637841	0.95302	0.907286	0.61	1.36
BAG4	219624_at	0.41019	0.87784	0.85572	0.59	1.24	0.677941	0.993177	0.947636	0.74	1.22	0.754985	0.92872	0.940778	0.64	1.38	0.97424	0.99285	1.00461	0.76	1.33
ADSSL1	226325_at	0.754135	0.971765	0.909552	0.5	1.65	0.966548	0.993177	0.995539	0.81	1.23	0.858353	0.931917	1.059	0.56	1.99	0.920215	0.986472	1.01168	0.81	1.27
TPCN2	242554_at	0.0853479	0.872577	1.38187	0.96	2	0.0984911	0.993177	1.51241	0.93	2.47	0.13381	0.769571	1.32368	0.92	1.91	0.133604	0.93455	1.45375	0.89	2.37
INO80D	226555_at	0.894942	0.993768	1.04073	0.58	1.88	0.388387	0.993177	1.27	0.74	2.19	0.714793	0.92872	1.12019	0.61	2.06	0.371972	0.95302	1.28493	0.74	2.23
ORC2	235423_at	0.807482	0.971765	0.894452	0.36	2.19	0.900044	0.993177	1.03281	0.62	1.71	0.80845	0.92872	0.884171	0.33	2.39	0.745611	0.95302	0.912631	0.53	1.59
ERLIN2	221542_s_at	0.224631	0.872577	0.774617	0.51	1.17	0.83988	0.993177	0.972935	0.75	1.27	0.461062	0.769571	0.854149	0.56	1.3	0.875821	0.970039	1.02262	0.77	1.35
SLC35E3	218988_at	0.0768562	0.872577	1.44388	0.96	2.17	0.672455	0.993177	1.12713	0.65	1.96	0.161647	0.769571	1.32837	0.89	1.98	0.98492	0.99285	1.00511	0.59	1.71
COMMD1	226024_at	0.361845	0.87784	1.55993	0.6	4.06	0.0475372	0.993177	1.92997	1.01	3.7	0.705763	0.92872	1.20235	0.46	3.13	0.0513965	0.93455	1.80107	1	3.26
BAZ1A	217986_s_at	0.995567	0.995567	1.00223	0.46	2.2	0.680652	0.993177	1.10699	0.68	1.8	0.371964	0.769571	1.43619	0.65	3.18	0.306939	0.95302	1.32158	0.77	2.26
MRPS12	204331_s_at	0.661613	0.966697	0.86093	0.44	1.68	0.704964	0.993177	0.924056	0.61	1.39	0.393088	0.769571	0.736356	0.36	1.49	0.254879	0.93455	0.772788	0.5	1.2
USO1	201832_s_at	0.159873	0.872577	0.356307	0.08	1.5	0.244353	0.993177	0.669483	0.34	1.32	0.109789	0.769571	0.312104	0.07	1.3	0.262815	0.93455	0.689453	0.36	1.32
SIGMAR1	214484_s_at	0.789876	0.971765	1.06984	0.65	1.76	0.919842	0.993177	1.01583	0.75	1.38	0.890496	0.941639	1.03595	0.63	1.71	0.736433	0.95302	1.05117	0.79	1.41
GRHPR	214864_s_at	0.148095	0.872577	1.63865	0.84	3.2	0.0957719	0.993177	1.52851	0.93	2.52	0.151213	0.769571	1.64296	0.83	3.24	0.0522291	0.93455	1.61902	1	2.63
GEMIN2	211114_x_at	0.969539	0.993768	0.986117	0.48	2.02	0.584639	0.993177	1.13048	0.73	1.75	0.453655	0.769571	1.3123	0.64	2.67	0.249145	0.93455	1.32581	0.82	2.14
RAB21	203885_at	0.00143973	0.180254	2.71715	1.47	5.02	0.000504779	0.315992	2.68035	1.54	4.67	0.0119405	0.737849	2.28214	1.2	4.34	0.00131494	0.823153	2.35934	1.4	3.98
VAPA	225198_at	0.304868	0.87784	0.626279	0.26	1.53	0.977975	0.993177	1.00624	0.65	1.56	0.718433	0.92872	0.83238	0.31	2.26	0.478941	0.95302	1.19714	0.73	1.97
DCUN1D1	218583_s_at	0.233829	0.87784	0.845545	0.64	1.11	0.362828	0.993177	0.843344	0.58	1.22	0.188474	0.769571	0.81385	0.6	1.11	0.235331	0.93455	0.784608	0.53	1.17
C8orf40	225534_at	0.943014	0.993768	1.01534	0.67	1.54	0.693797	0.993177	1.08438	0.72	1.62	0.469355	0.769571	1.17531	0.76	1.82	0.44902	0.95302	1.18569	0.76	1.84
MRPL52	226241_s_at	0.941265	0.993768	1.03591	0.41	2.65	0.621668	0.993177	1.12787	0.7	1.82	0.347826	0.769571	1.58568	0.61	4.15	0.180904	0.93455	1.44514	0.84	2.48
EIF4EBP1	221539_at	0.195562	0.872577	0.758689	0.5	1.15	0.565399	0.993177	1.08135	0.83	1.41	0.41201	0.769571	0.837166	0.55	1.28	0.283074	0.93455	1.16957	0.88	1.56
BAZ1A	217985_s_at	0.995567	0.995567	1.00223	0.46	2.2	0.619015	0.993177	1.11375	0.73	1.7	0.371964	0.769571	1.43619	0.65	3.18	0.376836	0.95302	1.2255	0.78	1.92
ERLIN2	221543_s_at	0.224631	0.872577	0.774617	0.51	1.17	0.918197	0.993177	0.985422	0.74	1.3	0.461062	0.769571	0.854149	0.56	1.3	0.946049	0.990345	1.01032	0.75	1.36
RALBP1	202845_s_at	0.245259	0.87784	0.536821	0.19	1.53	0.874324	0.993177	0.96273	0.6	1.54	0.470519	0.769571	0.650788	0.2	2.09	0.827037	0.969198	1.05907	0.63	1.77
MED29	225708_at	0.58455	0.94069	0.83159	0.43	1.61	0.712952	0.993177	0.901288	0.52	1.57	0.350668	0.769571	0.719501	0.36	1.44	0.321198	0.95302	0.734396	0.4	1.35
GRHPR	201347_x_at	0.148095	0.872577	1.63865	0.84	3.2	0.16459	0.993177	1.41677	0.87	2.32	0.151213	0.769571	1.64296	0.83	3.24	0.117512	0.93455	1.46343	0.91	2.36
NUMA1	200747_s_at	0.530027	0.934639	0.714485	0.25	2.04	0.830018	0.993177	0.923645	0.45	1.91	0.817452	0.92872	0.875563	0.28	2.71	0.60856	0.95302	1.22833	0.56	2.7
NGDN	213794_s_at	0.902026	0.993768	1.06032	0.42	2.69	0.798597	0.993177	1.08371	0.58	2.01	0.308649	0.769571	1.64121	0.63	4.26	0.526203	0.95302	1.23936	0.64	2.41
NFKBIB	228388_at	0.661613	0.966697	0.86093	0.44	1.68	0.841336	0.993177	0.949886	0.57	1.57	0.393088	0.769571	0.736356	0.36	1.49	0.583496	0.95302	0.868413	0.52	1.44
PAF1	202093_s_at	0.58455	0.94069	0.83159	0.43	1.61	0.750804	0.993177	1.10742	0.59	2.08	0.350668	0.769571	0.719501	0.36	1.44	0.735693	0.95302	0.889846	0.45	1.75
SCFD1	215548_s_at	0.77632	0.971765	1.18174	0.37	3.74	0.429267	0.993177	1.2605	0.71	2.24	0.24853	0.769571	2.09473	0.6	7.35	0.17409	0.93455	1.52917	0.83	2.82
PROSC	209384_at	0.224631	0.872577	0.774617	0.51	1.17	0.946729	0.993177	0.989277	0.72	1.36	0.461062	0.769571	0.854149	0.56	1.3	0.623322	0.95302	1.08468	0.78	1.5
RUSC2	213066_at	0.611612	0.966697	1.12532	0.71	1.77	0.631773	0.993177	1.2392	0.52	2.98	0.643781	0.904384	1.10841	0.72	1.71	0.542667	0.95302	1.29943	0.56	3.02
SMU1	218393_s_at	0.338015	0.87784	1.40419	0.7	2.81	0.643068	0.993177	1.10611	0.72	1.69	0.351015	0.769571	1.37382	0.7	2.68	0.604539	0.95302	1.11995	0.73	1.72
FAM98C	227951_s_at	0.661613	0.966697	0.86093	0.44	1.68	0.705021	0.993177	0.921076	0.6	1.41	0.393088	0.769571	0.736356	0.36	1.49	0.382075	0.95302	0.813831	0.51	1.29
POLB	203616_at	0.979481	0.993768	1.00558	0.66	1.54	0.589522	0.993177	1.11587	0.75	1.66	0.520472	0.826944	1.15778	0.74	1.81	0.240015	0.93455	1.28587	0.85	1.96
SNX6	217789_at	0.995567	0.995567	1.00223	0.46	2.2	0.699652	0.993177	1.11924	0.63	1.98	0.371964	0.769571	1.43619	0.65	3.18	0.216215	0.93455	1.50655	0.79	2.88
EAPP	202623_at	0.995567	0.995567	1.00223	0.46	2.2	0.497488	0.993177	0.816875	0.46	1.47	0.371964	0.769571	1.43619	0.65	3.18	0.624421	0.95302	0.855245	0.46	1.6
GRHPR	216308_x_at	0.148095	0.872577	1.63865	0.84	3.2	0.153465	0.993177	1.44405	0.87	2.39	0.151213	0.769571	1.64296	0.83	3.24	0.0810118	0.93455	1.53833	0.95	2.5
PRMT5	1564520_s_at	0.941265	0.993768	1.03591	0.41	2.65	0.352398	0.993177	1.21277	0.81	1.82	0.347826	0.769571	1.58568	0.61	4.15	0.0769574	0.93455	1.52468	0.96	2.43
PROSC	214545_s_at	0.224631	0.872577	0.774617	0.51	1.17	0.923729	0.993177	0.98477	0.72	1.35	0.461062	0.769571	0.854149	0.56	1.3	0.84915	0.969198	1.03185	0.75	1.43
BRMS1L	224484_s_at	0.978015	0.993768	1.01128	0.46	2.25	0.890247	0.993177	0.979906	0.73	1.31	0.380751	0.769571	1.43079	0.64	3.19	0.867673	0.970039	1.02825	0.74	1.43
GEMIN2	210779_x_at	0.969539	0.993768	0.986117	0.48	2.02	0.806439	0.993177	1.05706	0.68	1.65	0.453655	0.769571	1.3123	0.64	2.67	0.394102	0.95302	1.22859	0.77	1.97
EID2	225936_at	0.516333	0.934175	0.797888	0.4	1.58	0.408076	0.993177	0.806547	0.48	1.34	0.304843	0.769571	0.688286	0.34	1.4	0.160134	0.93455	0.675434	0.39	1.17
VDAC3	208845_at	0.979481	0.993768	1.00558	0.66	1.54	0.195375	0.993177	1.39534	0.84	2.31	0.520472	0.826944	1.15778	0.74	1.81	0.0946283	0.93455	1.62101	0.92	2.86
COMMD8	218351_at	0.900883	0.993768	0.95167	0.44	2.08	0.62214	0.993177	0.877192	0.52	1.48	0.948977	0.964382	0.972738	0.42	2.27	0.813854	0.969198	0.937852	0.55	1.6
TOX4	201684_s_at	0.810012	0.971765	0.909262	0.42	1.97	0.907105	0.993177	1.03859	0.55	1.96	0.627291	0.89174	1.20891	0.56	2.6	0.437806	0.95302	1.30226	0.67	2.54
NUP153	202097_at	0.289681	0.87784	0.38437	0.07	2.26	0.791022	0.993177	0.929513	0.54	1.6	0.27236	0.769571	0.375914	0.07	2.16	0.542714	0.95302	0.836702	0.47	1.49
SNX6	222410_s_at	0.995567	0.995567	1.00223	0.46	2.2	0.914644	0.993177	0.968461	0.54	1.74	0.371964	0.769571	1.43619	0.65	3.18	0.614248	0.95302	1.18003	0.62	2.25
IFT74	61732_r_at	0.882067	0.993768	1.04918	0.56	1.98	0.335247	0.993177	0.787008	0.48	1.28	0.798782	0.92872	1.09249	0.55	2.16	0.507969	0.95302	0.840933	0.5	1.4
TBC1D15	218268_at	0.00143973	0.180254	2.71715	1.47	5.02	0.0206356	0.993177	2.31478	1.14	4.71	0.0119405	0.737849	2.28214	1.2	4.34	0.0618153	0.93455	1.94645	0.97	3.92
VDAC3	208846_s_at	0.979481	0.993768	1.00558	0.66	1.54	0.276197	0.993177	1.21943	0.85	1.74	0.520472	0.826944	1.15778	0.74	1.81	0.0979402	0.93455	1.40554	0.94	2.1
ZBTB5	203026_at	0.148095	0.872577	1.63865	0.84	3.2	0.584095	0.993177	1.14276	0.71	1.84	0.151213	0.769571	1.64296	0.83	3.24	0.494471	0.95302	1.17636	0.74	1.87
PNN	1567214_a_at	0.969539	0.993768	0.986117	0.48	2.02	0.848218	0.993177	0.950239	0.56	1.6	0.453655	0.769571	1.3123	0.64	2.67	0.952797	0.992431	0.983173	0.56	1.72
OPA3	229624_at	0.927382	0.993768	1.03832	0.46	2.33	0.621735	0.993177	1.25133	0.51	3.05	0.94884	0.964382	0.968872	0.37	2.55	0.6041	0.95302	1.29235	0.49	3.41
C2orf69	227973_at	0.766441	0.971765	0.881279	0.38	2.03	0.740116	0.993177	0.924715	0.58	1.47	0.782666	0.92872	0.882275	0.36	2.15	0.663922	0.95302	0.899775	0.56	1.45
ECH1	200789_at	0.661613	0.966697	0.86093	0.44	1.68	0.804625	0.993177	0.938463	0.57	1.55	0.393088	0.769571	0.736356	0.36	1.49	0.433726	0.95302	0.805634	0.47	1.38
SMURF1	215458_s_at	0.184591	0.872577	2.18871	0.69	6.96	0.302631	0.993177	1.23975	0.82	1.87	0.13755	0.769571	2.27358	0.77	6.72	0.159475	0.93455	1.34497	0.89	2.03
DDHD2	212690_at	0.41019	0.87784	0.85572	0.59	1.24	0.411849	0.993177	0.887316	0.67	1.18	0.754985	0.92872	0.940778	0.64	1.38	0.670969	0.95302	0.937377	0.7	1.26
EIF3K	236605_at	0.661613	0.966697	0.86093	0.44	1.68	0.423578	0.993177	0.740684	0.36	1.55	0.393088	0.769571	0.736356	0.36	1.49	0.307586	0.95302	0.694065	0.34	1.4
ICA1L	230454_at	0.778591	0.971765	0.87644	0.35	2.2	0.666167	0.993177	0.894516	0.54	1.48	0.80601	0.92872	0.882238	0.32	2.4	0.744298	0.95302	0.920194	0.56	1.52
BPHL	205750_at	0.910081	0.993768	0.940251	0.32	2.74	0.824904	0.993177	1.05365	0.66	1.67	0.983799	0.983799	0.988574	0.33	3	0.827737	0.969198	1.05708	0.64	1.74
NUDT2	218609_s_at	0.787764	0.971765	1.07328	0.64	1.8	0.641421	0.993177	0.915951	0.63	1.33	0.883293	0.941639	1.03953	0.62	1.74	0.782771	0.961703	0.951139	0.67	1.36
VPS4B	218171_at	0.595557	0.948648	0.797148	0.35	1.84	0.668561	0.993177	0.88345	0.5	1.56	0.957354	0.967318	0.975751	0.4	2.4	0.841772	0.969198	0.937266	0.5	1.77
GBA2	223921_s_at	0.561756	0.940266	1.15221	0.71	1.86	0.820901	0.993177	0.921867	0.46	1.86	0.596951	0.875242	1.1303	0.72	1.78	0.87007	0.970039	0.944769	0.48	1.87
RPP40	213427_at	0.764836	0.971765	0.84201	0.27	2.6	0.756441	0.993177	0.938967	0.63	1.4	0.851552	0.931917	0.895872	0.28	2.83	0.760678	0.95302	0.934425	0.6	1.45
LAMTOR1	223009_at	0.530027	0.934639	0.714485	0.25	2.04	0.609483	0.993177	0.843052	0.44	1.62	0.817452	0.92872	0.875563	0.28	2.71	0.793979	0.96542	0.91302	0.46	1.81
DCTN3	204246_s_at	0.789876	0.971765	1.06984	0.65	1.76	0.664416	0.993177	1.10404	0.71	1.73	0.890496	0.941639	1.03595	0.63	1.71	0.56494	0.95302	1.13288	0.74	1.73
HNRNPA3	211930_at	0.672608	0.967937	0.823122	0.33	2.03	0.406114	0.993177	0.848357	0.58	1.25	0.536123	0.839032	0.746329	0.3	1.89	0.111237	0.93455	0.722038	0.48	1.08
KAT6A	202423_at	0.939323	0.993768	0.983472	0.64	1.51	0.549551	0.993177	1.14368	0.74	1.78	0.545452	0.84518	1.14875	0.73	1.8	0.0708175	0.93455	1.5575	0.96	2.52
SPINT2	210715_s_at	0.661613	0.966697	0.86093	0.44	1.68	0.309951	0.993177	0.796123	0.51	1.24	0.393088	0.769571	0.736356	0.36	1.49	0.0730855	0.93455	0.642251	0.4	1.04
CCDC107	229063_s_at	0.603232	0.958435	1.12881	0.71	1.78	0.335016	0.993177	1.28841	0.77	2.16	0.66332	0.909794	1.10223	0.71	1.71	0.194605	0.93455	1.37893	0.85	2.24
GBA2	224627_at	0.561756	0.940266	1.15221	0.71	1.86	0.98013	0.993177	0.99314	0.58	1.71	0.596951	0.875242	1.1303	0.72	1.78	0.862408	0.970039	0.952907	0.55	1.64
ZNF430	206829_x_at	0.58068	0.94069	0.735484	0.25	2.19	0.761198	0.993177	0.937505	0.62	1.42	0.749241	0.92872	0.822127	0.25	2.73	0.944261	0.990345	1.01628	0.65	1.6
CEP170B	213242_x_at	0.754135	0.971765	0.909552	0.5	1.65	0.58777	0.993177	1.16629	0.67	2.03	0.858353	0.931917	1.059	0.56	1.99	0.564937	0.95302	1.19713	0.65	2.21
WHSC1L1	221248_s_at	0.41019	0.87784	0.85572	0.59	1.24	0.852663	0.993177	1.03174	0.74	1.43	0.754985	0.92872	0.940778	0.64	1.38	0.593734	0.95302	1.10028	0.77	1.56
ALS2	232184_at	0.793192	0.971765	0.885205	0.36	2.2	0.756013	0.993177	1.05729	0.74	1.5	0.817282	0.92872	0.88906	0.33	2.41	0.907146	0.986472	1.02425	0.68	1.53
TIMM50	224913_s_at	0.516333	0.934175	0.797888	0.4	1.58	0.981584	0.993177	1.0051	0.65	1.55	0.304843	0.769571	0.688286	0.34	1.4	0.650293	0.95302	0.90437	0.59	1.4
MORC3	213000_at	0.358129	0.87784	0.645628	0.25	1.64	0.829603	0.993177	0.950537	0.6	1.51	0.171348	0.769571	0.479215	0.17	1.37	0.514853	0.95302	0.847242	0.51	1.4
DSCR3	203635_at	0.371463	0.87784	0.655964	0.26	1.65	0.847015	0.993177	0.944319	0.53	1.69	0.170508	0.769571	0.47235	0.16	1.38	0.564373	0.95302	0.838903	0.46	1.52
TRAK2	202125_s_at	0.807482	0.971765	0.894452	0.36	2.19	0.540566	0.993177	0.85125	0.51	1.43	0.80845	0.92872	0.884171	0.33	2.39	0.834756	0.969198	0.942184	0.54	1.65
POLR2B	1555837_s_at	0.120235	0.872577	0.346488	0.09	1.32	0.138009	0.993177	0.665767	0.39	1.14	0.0961201	0.769571	0.314396	0.08	1.23	0.12032	0.93455	0.65179	0.38	1.12
UBAP1	221490_at	0.787764	0.971765	1.07328	0.64	1.8	0.549408	0.993177	1.16658	0.7	1.93	0.883293	0.941639	1.03953	0.62	1.74	0.2626	0.93455	1.3265	0.81	2.17
FAM126B	229460_at	0.807482	0.971765	0.894452	0.36	2.19	0.525903	0.993177	0.869683	0.56	1.34	0.80845	0.92872	0.884171	0.33	2.39	0.425105	0.95302	0.81784	0.5	1.34
PROSC	209385_s_at	0.224631	0.872577	0.774617	0.51	1.17	0.883192	0.993177	1.02421	0.74	1.41	0.461062	0.769571	0.854149	0.56	1.3	0.559416	0.95302	1.1025	0.79	1.53
ERMP1	222603_at	0.11368	0.872577	1.43998	0.92	2.26	0.0443406	0.993177	1.39238	1.01	1.92	0.228244	0.769571	1.31351	0.84	2.05	0.0260451	0.93455	1.42423	1.04	1.94
ARHGAP5	233849_s_at	0.719936	0.971765	0.847937	0.34	2.09	0.944403	0.993177	0.984272	0.63	1.54	0.680217	0.927703	1.20704	0.49	2.95	0.446226	0.95302	1.20768	0.74	1.96
BRF2	218954_s_at	0.224631	0.872577	0.774617	0.51	1.17	0.701017	0.993177	0.939202	0.68	1.29	0.461062	0.769571	0.854149	0.56	1.3	0.993685	0.996326	1.00138	0.71	1.41
ZNF24	212534_at	0.462222	0.90477	0.699749	0.27	1.81	0.883574	0.993177	0.957008	0.53	1.72	0.695579	0.92872	0.815248	0.29	2.27	0.732818	0.95302	1.11393	0.6	2.07
TRRAP	214908_s_at	0.184591	0.872577	2.18871	0.69	6.96	0.495285	0.993177	1.1458	0.77	1.69	0.13755	0.769571	2.27358	0.77	6.72	0.355678	0.95302	1.21254	0.81	1.83
WHSC1L1	218173_s_at	0.41019	0.87784	0.85572	0.59	1.24	0.578343	0.993177	0.925513	0.7	1.22	0.754985	0.92872	0.940778	0.64	1.38	0.8387	0.969198	0.970265	0.73	1.3
NOA1	223157_at	0.120235	0.872577	0.346488	0.09	1.32	0.172992	0.993177	0.685481	0.4	1.18	0.0961201	0.769571	0.314396	0.08	1.23	0.320078	0.95302	0.75906	0.44	1.31
NFX1	1553103_at	0.348851	0.87784	1.39503	0.7	2.8	0.754443	0.993177	1.0972	0.61	1.96	0.365091	0.769571	1.36309	0.7	2.66	0.527486	0.95302	1.21988	0.66	2.26
BLOC1S3	228244_at	0.721518	0.971765	0.844823	0.33	2.14	0.847306	0.993177	0.932984	0.46	1.89	0.564523	0.857747	0.71613	0.23	2.23	0.824308	0.969198	0.914488	0.42	2.01
UBE2R2	226954_at	0.576097	0.94069	1.15533	0.7	1.92	0.426548	0.993177	1.24302	0.73	2.13	0.720251	0.92872	1.09901	0.66	1.84	0.372032	0.95302	1.26607	0.75	2.13
MELK	204825_at	0.297946	0.87784	1.2641	0.81	1.97	0.131718	0.993177	1.34263	0.92	1.97	0.365639	0.769571	1.22057	0.79	1.88	0.130503	0.93455	1.34729	0.92	1.98
IFT74	219174_at	0.882067	0.993768	1.04918	0.56	1.98	0.233868	0.993177	0.822153	0.6	1.13	0.798782	0.92872	1.09249	0.55	2.16	0.3547	0.95302	0.850833	0.6	1.2
ANKRD12	212289_at	0.245259	0.87784	0.536821	0.19	1.53	0.333841	0.993177	0.769502	0.45	1.31	0.470519	0.769571	0.650788	0.2	2.09	0.995376	0.996326	0.998241	0.55	1.81
SIRT2	1558331_at	0.661613	0.966697	0.86093	0.44	1.68	0.955659	0.993177	0.988725	0.66	1.47	0.393088	0.769571	0.736356	0.36	1.49	0.458014	0.95302	0.837317	0.52	1.34
HOOK3	224359_s_at	0.400724	0.87784	1.20402	0.78	1.86	0.252542	0.993177	1.29392	0.83	2.01	0.0819822	0.769571	1.49939	0.95	2.37	0.0295561	0.93455	1.69614	1.05	2.73
USP47	223117_s_at	0.0259703	0.872577	4.49988	1.2	16.91	0.39704	0.993177	1.2878	0.72	2.31	0.0141441	0.737849	5.64144	1.42	22.47	0.316096	0.95302	1.35947	0.75	2.48
EIF3K	210501_x_at	0.661613	0.966697	0.86093	0.44	1.68	0.766148	0.993177	0.927356	0.56	1.52	0.393088	0.769571	0.736356	0.36	1.49	0.504548	0.95302	0.843181	0.51	1.39
SOX2-OT	231898_x_at	0.277242	0.87784	0.875247	0.69	1.11	0.0642049	0.993177	0.903925	0.81	1.01	0.257513	0.769571	0.85854	0.66	1.12	0.0305849	0.93455	0.879678	0.78	0.99
EIF3K	212716_s_at	0.661613	0.966697	0.86093	0.44	1.68	0.989856	0.994623	1.00365	0.57	1.76	0.393088	0.769571	0.736356	0.36	1.49	0.697503	0.95302	0.893188	0.51	1.58
OPA3	206357_at	0.927382	0.993768	1.03832	0.46	2.33	0.757924	0.993177	0.909304	0.5	1.66	0.94884	0.964382	0.968872	0.37	2.55	0.384461	0.95302	0.743845	0.38	1.45
TOX4	201683_x_at	0.810012	0.971765	0.909262	0.42	1.97	0.459374	0.993177	1.22925	0.71	2.12	0.627291	0.89174	1.20891	0.56	2.6	0.309235	0.95302	1.35176	0.76	2.42
PSMD8	200820_at	0.661613	0.966697	0.86093	0.44	1.68	0.863341	0.993177	1.04011	0.66	1.63	0.393088	0.769571	0.736356	0.36	1.49	0.683437	0.95302	0.908889	0.57	1.44
PRPF4B	202126_at	0.814979	0.971765	0.875795	0.29	2.66	0.333166	0.993177	0.715892	0.36	1.41	0.882894	0.941639	0.917348	0.29	2.89	0.187794	0.93455	0.604382	0.29	1.28
BAG1	202387_at	0.348851	0.87784	1.39503	0.7	2.8	0.704013	0.993177	1.09132	0.7	1.71	0.365091	0.769571	1.36309	0.7	2.66	0.400004	0.95302	1.21723	0.77	1.92
PNN	212036_s_at	0.969539	0.993768	0.986117	0.48	2.02	0.801537	0.993177	0.933736	0.55	1.59	0.453655	0.769571	1.3123	0.64	2.67	0.833376	0.969198	0.940231	0.53	1.67
POLR2B	201803_at	0.120235	0.872577	0.346488	0.09	1.32	0.143856	0.993177	0.625099	0.33	1.17	0.0961201	0.769571	0.314396	0.08	1.23	0.160508	0.93455	0.644327	0.35	1.19
SMU1	222618_at	0.338015	0.87784	1.40419	0.7	2.81	0.652756	0.993177	0.891845	0.54	1.47	0.351015	0.769571	1.37382	0.7	2.68	0.840265	0.969198	0.949264	0.57	1.58
TOMM5	225036_at	0.156968	0.872577	1.68489	0.82	3.47	0.460944	0.993177	1.1816	0.76	1.84	0.195496	0.769571	1.60891	0.78	3.31	0.477191	0.95302	1.18133	0.75	1.87
TOMM5	228053_s_at	0.156968	0.872577	1.68489	0.82	3.47	0.654389	0.993177	1.10707	0.71	1.73	0.195496	0.769571	1.60891	0.78	3.31	0.518072	0.95302	1.15749	0.74	1.8
UBE2M	203109_at	0.209846	0.872577	0.590314	0.26	1.35	0.765242	0.993177	0.947253	0.66	1.35	0.0779271	0.769571	0.465344	0.2	1.09	0.261171	0.93455	0.800966	0.54	1.18
GALT	232708_at	0.789876	0.971765	1.06984	0.65	1.76	0.862391	0.993177	0.938103	0.46	1.93	0.890496	0.941639	1.03595	0.63	1.71	0.86242	0.970039	0.93989	0.47	1.89
TWF1	201745_at	0.209597	0.872577	0.266438	0.03	2.1	0.20494	0.993177	0.696633	0.4	1.22	0.227468	0.769571	0.262466	0.03	2.3	0.198517	0.93455	0.70178	0.41	1.2
PSMG2	218467_at	0.188395	0.872577	0.487105	0.17	1.42	0.335516	0.993177	0.721321	0.37	1.4	0.375052	0.769571	0.58258	0.18	1.92	0.736607	0.95302	0.881175	0.42	1.84
RAD1	204460_s_at	0.401121	0.87784	0.686984	0.29	1.65	0.897557	0.993177	0.967842	0.59	1.59	0.290427	0.769571	0.637243	0.28	1.47	0.700842	0.95302	0.907564	0.55	1.49
AP3M2	203410_at	0.915937	0.993768	1.02262	0.68	1.55	0.157587	0.993177	1.30428	0.9	1.89	0.461501	0.769571	1.17951	0.76	1.83	0.109755	0.93455	1.39059	0.93	2.08
DNAJA1	200880_at	0.338015	0.87784	1.40419	0.7	2.81	0.199585	0.993177	1.3578	0.85	2.17	0.351015	0.769571	1.37382	0.7	2.68	0.0971825	0.93455	1.46493	0.93	2.3
CLPTM1L	226935_s_at	0.956873	0.993768	0.979477	0.46	2.08	0.742447	0.993177	0.905342	0.5	1.64	0.749303	0.92872	0.885416	0.42	1.87	0.554007	0.95302	0.840198	0.47	1.5
BRF2	218955_at	0.224631	0.872577	0.774617	0.51	1.17	0.780318	0.993177	0.949184	0.66	1.37	0.461062	0.769571	0.854149	0.56	1.3	0.836478	0.969198	1.04218	0.7	1.54
ZFC3H1	1553736_at	0.00143973	0.180254	2.71715	1.47	5.02	0.0439607	0.993177	1.52721	1.01	2.31	0.0119405	0.737849	2.28214	1.2	4.34	0.0331888	0.93455	1.54215	1.04	2.3
MBIP	218411_s_at	0.399049	0.87784	1.40714	0.64	3.11	0.677271	0.993177	1.10037	0.7	1.73	0.117633	0.769571	1.83575	0.86	3.93	0.406559	0.95302	1.22322	0.76	1.97
DTD2	227158_at	0.769072	0.971765	0.875739	0.36	2.12	0.61918	0.993177	1.11955	0.72	1.75	0.622343	0.89174	1.24966	0.51	3.03	0.444826	0.95302	1.21966	0.73	2.03
WDR20	227693_at	0.550053	0.940266	1.27254	0.58	2.8	0.982228	0.993177	0.995092	0.65	1.53	0.324245	0.769571	1.55262	0.65	3.72	0.751637	0.95302	1.07624	0.68	1.7
TRIP13	204033_at	0.937034	0.993768	0.969727	0.45	2.08	0.983658	0.993177	1.00343	0.72	1.39	0.711436	0.92872	0.867097	0.41	1.85	0.767934	0.955719	0.950315	0.68	1.33
FAM219A	225146_at	0.797333	0.971765	1.06729	0.65	1.75	0.520156	0.993177	1.18818	0.7	2.01	0.896081	0.944355	1.03401	0.63	1.71	0.556689	0.95302	1.17153	0.69	1.99
HNRNPL	221860_at	0.661613	0.966697	0.86093	0.44	1.68	0.963782	0.993177	1.00832	0.71	1.44	0.393088	0.769571	0.736356	0.36	1.49	0.669674	0.95302	0.925898	0.65	1.32
CLPTM1L	223020_at	0.956873	0.993768	0.979477	0.46	2.08	0.822993	0.993177	0.942016	0.56	1.59	0.749303	0.92872	0.885416	0.42	1.87	0.674552	0.95302	0.896778	0.54	1.49
USP14	226567_at	0.182622	0.872577	0.518705	0.2	1.36	0.35174	0.993177	0.804702	0.51	1.27	0.453255	0.769571	0.670639	0.24	1.91	0.402747	0.95302	0.810335	0.5	1.33
MRPL36	224331_s_at	0.686816	0.971765	0.848162	0.38	1.89	0.364966	0.993177	0.765046	0.43	1.37	0.485295	0.780962	0.752709	0.34	1.67	0.286418	0.93455	0.731078	0.41	1.3
HGSNAT	222491_at	0.400724	0.87784	1.20402	0.78	1.86	0.383952	0.993177	1.27359	0.74	2.2	0.0819822	0.769571	1.49939	0.95	2.37	0.194695	0.93455	1.46778	0.82	2.62
BCKDHA	202331_at	0.812513	0.971765	1.09742	0.51	2.37	0.447576	0.993177	1.21507	0.73	2.01	0.929705	0.959363	0.964353	0.43	2.16	0.637141	0.95302	1.13265	0.68	1.9
NOP58	223096_at	0.793192	0.971765	0.885205	0.36	2.2	0.881606	0.993177	1.04396	0.59	1.84	0.817282	0.92872	0.88906	0.33	2.41	0.843122	0.969198	0.93944	0.51	1.74
NOL8	218244_at	0.874103	0.993768	1.14038	0.22	5.79	0.440105	0.993177	1.30981	0.66	2.6	0.873131	0.941639	1.14561	0.22	6.08	0.528526	0.95302	1.2525	0.62	2.52
ZNF622	225152_at	0.378304	0.87784	0.682308	0.29	1.6	0.557405	0.993177	1.18408	0.67	2.08	0.257776	0.769571	0.616126	0.27	1.43	0.924028	0.986472	0.970665	0.53	1.79
PTPN2	213136_at	0.188395	0.872577	0.487105	0.17	1.42	0.358751	0.993177	0.74479	0.4	1.4	0.375052	0.769571	0.58258	0.18	1.92	0.732991	0.95302	0.885692	0.44	1.78
USP14	201671_x_at	0.182622	0.872577	0.518705	0.2	1.36	0.517556	0.993177	0.846977	0.51	1.4	0.453255	0.769571	0.670639	0.24	1.91	0.815307	0.969198	0.936819	0.54	1.62
DNAJC19	225359_at	0.468721	0.90842	0.876169	0.61	1.25	0.473662	0.993177	0.883034	0.63	1.24	0.386529	0.769571	0.842333	0.57	1.24	0.405585	0.95302	0.859188	0.6	1.23
EEF1E1	204905_s_at	0.409275	0.87784	0.501794	0.1	2.58	0.964621	0.993177	0.991201	0.67	1.46	0.278211	0.769571	0.402987	0.08	2.08	0.605945	0.95302	0.895709	0.59	1.36
PIGO	214991_s_at	0.513311	0.934175	1.13406	0.78	1.65	0.375643	0.993177	1.20684	0.8	1.83	0.653006	0.904384	1.08997	0.75	1.59	0.405123	0.95302	1.19638	0.78	1.82
GOLGA7	1554167_a_at	0.620877	0.966697	1.22881	0.54	2.78	0.790057	0.993177	1.06092	0.69	1.64	0.201831	0.769571	1.75085	0.74	4.14	0.575858	0.95302	1.13906	0.72	1.8
NFX1	202584_at	0.348851	0.87784	1.39503	0.7	2.8	0.641169	0.993177	1.13252	0.67	1.91	0.365091	0.769571	1.36309	0.7	2.66	0.268025	0.93455	1.31753	0.81	2.15
LETM2	1557415_s_at	0.440815	0.892583	0.865412	0.6	1.25	0.924288	0.993177	0.984983	0.72	1.35	0.800249	0.92872	0.952096	0.65	1.39	0.776061	0.961703	1.04875	0.76	1.46
RPS16	226130_at	0.58455	0.94069	0.83159	0.43	1.61	0.965149	0.993177	1.01481	0.52	1.96	0.350668	0.769571	0.719501	0.36	1.44	0.46102	0.95302	0.759776	0.37	1.58
CWC15	223067_at	0.490779	0.930994	1.69535	0.38	7.61	0.82659	0.993177	0.912701	0.4	2.07	0.862856	0.933789	1.14783	0.24	5.49	0.592904	0.95302	0.792879	0.34	1.86
BAG4	222909_s_at	0.41019	0.87784	0.85572	0.59	1.24	0.604803	0.993177	0.924611	0.69	1.24	0.754985	0.92872	0.940778	0.64	1.38	0.932894	0.986472	0.986416	0.72	1.36
FASTKD2	229135_at	0.978918	0.993768	1.00812	0.55	1.84	0.997163	0.997194	1.00104	0.56	1.78	0.830574	0.931917	1.07118	0.57	2.01	0.848174	0.969198	1.05995	0.58	1.92
NOL6	218199_s_at	0.348851	0.87784	1.39503	0.7	2.8	0.57685	0.993177	1.1895	0.65	2.19	0.365091	0.769571	1.36309	0.7	2.66	0.282285	0.93455	1.38111	0.77	2.49
SUPT5H	201480_s_at	0.516333	0.934175	0.797888	0.4	1.58	0.386616	0.993177	1.30505	0.71	2.38	0.304843	0.769571	0.688286	0.34	1.4	0.558225	0.95302	1.21327	0.64	2.32
EXOC1	222127_s_at	0.099888	0.872577	0.32965	0.09	1.24	0.460452	0.993177	0.78435	0.41	1.49	0.0697898	0.769571	0.287239	0.07	1.11	0.260667	0.93455	0.683163	0.35	1.33
ZNF271	211009_s_at	0.462222	0.90477	0.699749	0.27	1.81	0.525442	0.993177	0.857881	0.53	1.38	0.695579	0.92872	0.815248	0.29	2.27	0.970039	0.99285	1.01002	0.6	1.7
PSMC4	201252_at	0.664458	0.966697	0.867014	0.45	1.65	0.782649	0.993177	0.918271	0.5	1.68	0.444223	0.769571	0.771027	0.4	1.5	0.520307	0.95302	0.816564	0.44	1.51
LOC100506710	226635_at	0.0734094	0.872577	1.9015	0.94	3.84	0.582456	0.993177	1.14769	0.7	1.88	0.0812721	0.769571	1.87213	0.93	3.79	0.66377	0.95302	1.11989	0.67	1.87
LOC100506710	225635_s_at	0.0734094	0.872577	1.9015	0.94	3.84	0.317914	0.993177	1.35338	0.75	2.45	0.0812721	0.769571	1.87213	0.93	3.79	0.23678	0.93455	1.43239	0.79	2.6
NFX1	202585_s_at	0.348851	0.87784	1.39503	0.7	2.8	0.447035	0.993177	1.24328	0.71	2.18	0.365091	0.769571	1.36309	0.7	2.66	0.15743	0.93455	1.46639	0.86	2.49
NSUN2	223076_s_at	0.325398	0.87784	0.641331	0.26	1.55	0.663363	0.993177	0.888928	0.52	1.51	0.196761	0.769571	0.560131	0.23	1.35	0.353385	0.95302	0.777809	0.46	1.32
HN1L	212115_at	0.964568	0.993768	1.02975	0.28	3.75	0.655128	0.993177	0.867672	0.47	1.62	0.773283	0.92872	1.23007	0.3	5.03	0.74027	0.95302	0.893296	0.46	1.74
BTBD10	223174_at	0.287801	0.87784	2.27722	0.5	10.39	0.324517	0.993177	1.43806	0.7	2.96	0.158217	0.769571	3.02436	0.65	14.07	0.259374	0.93455	1.58025	0.71	3.5
AP4S1	210277_at	0.635827	0.966697	1.3071	0.43	3.96	0.562686	0.993177	1.14374	0.73	1.8	0.155829	0.769571	2.39463	0.72	8	0.338953	0.95302	1.26926	0.78	2.07
EXOSC3	227916_x_at	0.108234	0.872577	1.9408	0.86	4.36	0.307544	0.993177	1.25407	0.81	1.94	0.129723	0.769571	1.84684	0.84	4.08	0.276524	0.93455	1.28001	0.82	2
CCNK	225824_at	0.4207	0.87784	1.36612	0.64	2.92	0.296389	0.993177	1.30554	0.79	2.15	0.181935	0.769571	1.76813	0.77	4.08	0.155133	0.93455	1.49795	0.86	2.61
SNW1	201575_at	0.054233	0.872577	3.69136	0.98	13.95	0.103851	0.993177	1.86938	0.88	3.97	0.0267628	0.769571	5.31086	1.21	23.27	0.081512	0.93455	2.08432	0.91	4.76
C17orf80	223351_at	0.41246	0.87784	0.545738	0.13	2.32	0.630411	0.993177	0.865933	0.48	1.56	0.466174	0.769571	0.585846	0.14	2.47	0.727283	0.95302	0.903937	0.51	1.59
ZKSCAN5	203730_s_at	0.184591	0.872577	2.18871	0.69	6.96	0.0972616	0.993177	1.88585	0.89	3.99	0.13755	0.769571	2.27358	0.77	6.72	0.0645089	0.93455	1.99768	0.96	4.16
USP14	201672_s_at	0.182622	0.872577	0.518705	0.2	1.36	0.233153	0.993177	0.70395	0.4	1.25	0.453255	0.769571	0.670639	0.24	1.91	0.402981	0.95302	0.761792	0.4	1.44
C5orf22	203738_at	0.290207	0.87784	0.622239	0.26	1.5	0.841247	0.993177	0.952602	0.59	1.53	0.202853	0.769571	0.581072	0.25	1.34	0.665689	0.95302	0.903938	0.57	1.43
SRP72	208801_at	0.104626	0.872577	0.324585	0.08	1.26	0.595514	0.993177	0.844714	0.45	1.58	0.0747604	0.769571	0.281665	0.07	1.13	0.532341	0.95302	0.816439	0.43	1.54
DYRK1A	209033_s_at	0.371463	0.87784	0.655964	0.26	1.65	0.666324	0.993177	0.867417	0.45	1.66	0.170508	0.769571	0.47235	0.16	1.38	0.473019	0.95302	0.784346	0.4	1.52
RALBP1	226957_x_at	0.245259	0.87784	0.536821	0.19	1.53	0.716213	0.993177	0.905983	0.53	1.54	0.470519	0.769571	0.650788	0.2	2.09	0.909822	0.986472	1.03441	0.58	1.86
TOPORS	204071_s_at	0.465393	0.90477	1.39891	0.57	3.45	0.659834	0.993177	0.906483	0.59	1.4	0.427587	0.769571	1.42908	0.59	3.45	0.63557	0.95302	0.895721	0.57	1.41
PTPN2	213137_s_at	0.188395	0.872577	0.487105	0.17	1.42	0.382385	0.993177	0.780301	0.45	1.36	0.375052	0.769571	0.58258	0.18	1.92	0.878781	0.970224	0.952358	0.51	1.78
BAG1	211475_s_at	0.348851	0.87784	1.39503	0.7	2.8	0.797581	0.993177	1.05874	0.68	1.64	0.365091	0.769571	1.36309	0.7	2.66	0.518882	0.95302	1.15719	0.74	1.8
HECTD1	224481_s_at	0.635827	0.966697	1.3071	0.43	3.96	0.758449	0.993177	0.899763	0.46	1.76	0.155829	0.769571	2.39463	0.72	8	0.941122	0.990345	1.02852	0.49	2.17
SMURF2	205596_s_at	0.774598	0.971765	0.798615	0.17	3.72	0.914089	0.993177	0.970193	0.56	1.68	0.641319	0.904203	0.699717	0.16	3.14	0.708648	0.95302	0.898064	0.51	1.58
TMEM248	218008_at	0.126952	0.872577	0.325743	0.08	1.38	0.454273	0.993177	0.797607	0.44	1.44	0.111482	0.769571	0.306901	0.07	1.31	0.298519	0.939258	0.7239	0.39	1.33
DCAF7	224748_at	0.484475	0.921828	0.530687	0.09	3.14	0.656097	0.993177	0.852052	0.42	1.72	0.4294	0.769571	0.505951	0.09	2.74	0.588049	0.95302	0.821789	0.4	1.67
CCDC97	225257_at	0.812513	0.971765	1.09742	0.51	2.37	0.909444	0.993177	1.03536	0.57	1.88	0.929705	0.959363	0.964353	0.43	2.16	0.614341	0.95302	1.18216	0.62	2.27
ZNF576	219088_s_at	0.526467	0.934639	0.73791	0.29	1.89	0.364564	0.993177	0.766642	0.43	1.36	0.42026	0.769571	0.646182	0.22	1.87	0.204878	0.93455	0.647831	0.33	1.27
DYRK2	202969_at	0.128603	0.872577	1.43213	0.9	2.28	0.714518	0.993177	1.10658	0.64	1.9	0.213401	0.769571	1.3267	0.85	2.07	0.980927	0.99285	1.00629	0.6	1.68
YES1	202932_at	0.218529	0.872577	0.529816	0.19	1.46	0.827188	0.993177	1.05184	0.67	1.66	0.427089	0.769571	0.632655	0.2	1.96	0.361097	0.95302	1.27036	0.76	2.12
ABI2	207268_x_at	0.778591	0.971765	0.87644	0.35	2.2	0.231354	0.993177	1.41995	0.8	2.52	0.80601	0.92872	0.882238	0.32	2.4	0.194391	0.93455	1.53894	0.8	2.95
ZNF446	1554160_a_at	0.209846	0.872577	0.590314	0.26	1.35	0.253546	0.993177	0.609688	0.26	1.43	0.0779271	0.769571	0.465344	0.2	1.09	0.0697049	0.93455	0.419058	0.16	1.07
USP47	223701_s_at	0.0259703	0.872577	4.49988	1.2	16.91	0.453807	0.993177	1.20372	0.74	1.96	0.0141441	0.737849	5.64144	1.42	22.47	0.431144	0.95302	1.24319	0.72	2.14
EIF3K	221494_x_at	0.661613	0.966697	0.86093	0.44	1.68	0.791489	0.993177	0.936539	0.58	1.52	0.393088	0.769571	0.736356	0.36	1.49	0.521351	0.95302	0.852051	0.52	1.39
SEH1L	221931_s_at	0.188395	0.872577	0.487105	0.17	1.42	0.708237	0.993177	1.08592	0.71	1.67	0.375052	0.769571	0.58258	0.18	1.92	0.463112	0.95302	1.18655	0.75	1.87
SS18	202816_s_at	0.666059	0.966697	0.821894	0.34	2	0.78096	0.993177	1.06294	0.69	1.63	0.904822	0.947188	1.06026	0.41	2.77	0.858725	0.970039	1.04292	0.66	1.66
PUS7L	221025_x_at	0.209597	0.872577	0.266438	0.03	2.1	0.194711	0.993177	0.591128	0.27	1.31	0.227468	0.769571	0.262466	0.03	2.3	0.148558	0.93455	0.54178	0.24	1.24
HOOK3	226395_at	0.400724	0.87784	1.20402	0.78	1.86	0.188131	0.993177	1.35944	0.86	2.15	0.0819822	0.769571	1.49939	0.95	2.37	0.0673866	0.93455	1.59944	0.97	2.65
RAB2B	225074_at	0.810012	0.971765	0.909262	0.42	1.97	0.658121	0.993177	0.860753	0.44	1.67	0.627291	0.89174	1.20891	0.56	2.6	0.820616	0.969198	0.925318	0.47	1.81
TM2D2	224413_s_at	0.964399	0.993768	0.989365	0.62	1.58	0.186569	0.993177	1.30394	0.88	1.93	0.575034	0.867401	1.15145	0.7	1.89	0.123268	0.93455	1.38839	0.91	2.11
NFXL1	227220_at	0.873786	0.993768	1.06284	0.5	2.25	0.658129	0.993177	1.09228	0.74	1.61	0.893259	0.942968	1.05872	0.46	2.44	0.70533	0.95302	1.07859	0.73	1.6
ERMP1	218342_s_at	0.11368	0.872577	1.43998	0.92	2.26	0.0830173	0.993177	1.34551	0.96	1.88	0.228244	0.769571	1.31351	0.84	2.05	0.0438514	0.93455	1.39759	1.01	1.94
CCT5	208696_at	0.331441	0.87784	0.645314	0.27	1.56	0.833226	0.993177	1.05145	0.66	1.68	0.186803	0.769571	0.554438	0.23	1.33	0.921934	0.986472	0.977055	0.61	1.55
SFSWAP	202775_s_at	0.247823	0.87784	0.494175	0.15	1.63	0.642925	0.993177	0.862279	0.46	1.61	0.442457	0.769571	0.604486	0.17	2.18	0.923922	0.986472	1.03433	0.52	2.07
CAND1	208838_at	0.313539	0.87784	1.26646	0.8	2	0.591558	0.993177	1.13147	0.72	1.78	0.33315	0.769571	1.24106	0.8	1.92	0.732643	0.95302	1.08123	0.69	1.69
HOOK3	235114_x_at	0.400724	0.87784	1.20402	0.78	1.86	0.338195	0.993177	1.19505	0.83	1.72	0.0819822	0.769571	1.49939	0.95	2.37	0.108308	0.93455	1.40744	0.93	2.14
NNT	202784_s_at	0.210542	0.872577	0.570663	0.24	1.37	0.0474999	0.993177	0.650907	0.43	1	0.138481	0.769571	0.527748	0.23	1.23	0.0161806	0.93455	0.592136	0.39	0.91
ABCC5	226363_at	0.364914	0.87784	0.815221	0.52	1.27	0.573329	0.993177	0.933759	0.74	1.19	0.232994	0.769571	0.724851	0.43	1.23	0.27258	0.93455	0.864929	0.67	1.12
FBL	211623_s_at	0.664458	0.966697	0.867014	0.45	1.65	0.817806	0.993177	1.04384	0.72	1.5	0.444223	0.769571	0.771027	0.4	1.5	0.893151	0.980899	1.02419	0.72	1.45
TPCN2	229250_at	0.0853479	0.872577	1.38187	0.96	2	0.0262523	0.993177	1.85706	1.08	3.21	0.13381	0.769571	1.32368	0.92	1.91	0.0316256	0.93455	1.77305	1.05	2.99
PAIP1	213754_s_at	0.225609	0.872577	0.578398	0.24	1.4	0.737314	0.993177	0.907705	0.52	1.6	0.159341	0.769571	0.544829	0.23	1.27	0.326403	0.95302	0.745238	0.41	1.34
PPFIA1	202066_at	0.571727	0.94069	1.06299	0.86	1.31	0.177614	0.993177	1.2435	0.91	1.71	0.319818	0.769571	1.1155	0.9	1.38	0.102236	0.93455	1.32498	0.95	1.86
ZCCHC7	226496_at	0.148095	0.872577	1.63865	0.84	3.2	0.548774	0.993177	1.16314	0.71	1.91	0.151213	0.769571	1.64296	0.83	3.24	0.351131	0.95302	1.28107	0.76	2.16
NDUFB3	203371_s_at	0.807482	0.971765	0.894452	0.36	2.19	0.536252	0.993177	0.765723	0.33	1.78	0.80845	0.92872	0.884171	0.33	2.39	0.504516	0.95302	0.733679	0.3	1.82
VAPA	208780_x_at	0.304868	0.87784	0.626279	0.26	1.53	0.566942	0.993177	1.20806	0.63	2.31	0.718433	0.92872	0.83238	0.31	2.26	0.20309	0.93455	1.60787	0.77	3.34
RNF20	222683_at	0.380404	0.87784	2.09005	0.4	10.85	0.339748	0.993177	0.715298	0.36	1.42	0.35667	0.769571	2.22779	0.41	12.23	0.111646	0.93455	0.527612	0.24	1.16
SIVA1	203489_at	0.754135	0.971765	0.909552	0.5	1.65	0.907468	0.993177	1.03076	0.62	1.72	0.858353	0.931917	1.059	0.56	1.99	0.915291	0.986472	1.03189	0.58	1.84
CHMP7	212313_at	0.214958	0.872577	2.89312	0.54	15.51	0.121475	0.993177	1.82412	0.85	3.9	0.14855	0.769571	3.71663	0.63	22.06	0.0589181	0.93455	2.21231	0.97	5.04
C14orf119	223060_at	0.840564	0.985893	0.899254	0.32	2.53	0.744464	0.993177	1.11648	0.58	2.17	0.455835	0.769571	1.48244	0.53	4.17	0.500592	0.95302	1.26463	0.64	2.5
PCNT	203660_s_at	0.253728	0.87784	1.85313	0.64	5.35	0.588443	0.993177	0.828702	0.42	1.64	0.47084	0.769571	1.53951	0.48	4.97	0.437765	0.95302	0.761976	0.38	1.51
ZSCAN30	1562988_at	0.462222	0.90477	0.699749	0.27	1.81	0.581323	0.993177	0.816069	0.4	1.68	0.695579	0.92872	0.815248	0.29	2.27	0.622001	0.95302	0.815275	0.36	1.84
TRMT10B	235303_at	0.108234	0.872577	1.9408	0.86	4.36	0.0992774	0.993177	1.52441	0.92	2.52	0.129723	0.769571	1.84684	0.84	4.08	0.0763584	0.93455	1.5754	0.95	2.6
ERCC1	203720_s_at	0.721518	0.971765	0.844823	0.33	2.14	0.82001	0.993177	0.936558	0.53	1.65	0.564523	0.857747	0.71613	0.23	2.23	0.754492	0.95302	0.908637	0.5	1.66
ABI2	211793_s_at	0.778591	0.971765	0.87644	0.35	2.2	0.40182	0.993177	1.26986	0.73	2.22	0.80601	0.92872	0.882238	0.32	2.4	0.298582	0.939258	1.39037	0.75	2.59
RNF170	226104_at	0.559229	0.940266	1.14654	0.72	1.81	0.189556	0.993177	1.40544	0.85	2.34	0.148232	0.769571	1.42362	0.88	2.3	0.12524	0.93455	1.56508	0.88	2.77
LINC00667	215283_at	0.11779	0.872577	0.471554	0.18	1.21	0.0529589	0.993177	0.644139	0.41	1.01	0.332526	0.769571	0.595091	0.21	1.7	0.126663	0.93455	0.66997	0.4	1.12
PSMB5	208799_at	0.941265	0.993768	1.03591	0.41	2.65	0.738448	0.993177	1.12608	0.56	2.26	0.347826	0.769571	1.58568	0.61	4.15	0.669958	0.95302	1.18722	0.54	2.61
LEMD3	218604_at	0.790328	0.971765	1.09104	0.57	2.07	0.914342	0.993177	0.967025	0.52	1.78	0.645983	0.904384	1.15691	0.62	2.15	0.839545	0.969198	0.938342	0.51	1.74
G2E3	223258_s_at	0.91276	0.993768	1.0693	0.32	3.55	0.74278	0.993177	1.06866	0.72	1.59	0.336408	0.769571	1.88666	0.52	6.88	0.842182	0.969198	1.04527	0.68	1.62
VPS54	218423_x_at	0.484446	0.921828	1.62317	0.42	6.31	0.407173	0.993177	1.30275	0.7	2.43	0.855758	0.931917	1.13087	0.3	4.26	0.588595	0.95302	1.1852	0.64	2.19
DIP2A	227199_at	0.216001	0.872577	1.86106	0.7	4.98	0.31692	0.993177	1.23414	0.82	1.86	0.374241	0.769571	1.60385	0.57	4.55	0.517828	0.95302	1.15516	0.75	1.79
VPS54	233656_s_at	0.484446	0.921828	1.62317	0.42	6.31	0.57588	0.993177	1.17488	0.67	2.07	0.855758	0.931917	1.13087	0.3	4.26	0.772807	0.959875	1.086	0.62	1.9
METTL4	219698_s_at	0.0995478	0.872577	0.387697	0.13	1.2	0.310517	0.993177	0.734365	0.4	1.33	0.253912	0.769571	0.479524	0.14	1.69	0.615207	0.95302	0.850462	0.45	1.6
CAND1	207483_s_at	0.313539	0.87784	1.26646	0.8	2	0.505029	0.993177	1.20515	0.7	2.09	0.33315	0.769571	1.24106	0.8	1.92	0.571533	0.95302	1.16616	0.68	1.99
C5orf28	219029_at	0.24542	0.87784	0.590758	0.24	1.44	0.611005	0.993177	0.880733	0.54	1.44	0.169751	0.769571	0.551508	0.24	1.29	0.268669	0.93455	0.750639	0.45	1.25
BRIX1	219177_at	0.401121	0.87784	0.686984	0.29	1.65	0.963044	0.993177	1.01055	0.65	1.58	0.290427	0.769571	0.637243	0.28	1.47	0.744146	0.95302	0.929749	0.6	1.44
DYRK2	202970_at	0.128603	0.872577	1.43213	0.9	2.28	0.734612	0.993177	1.11878	0.58	2.14	0.213401	0.769571	1.3267	0.85	2.07	0.90074	0.986472	0.960305	0.51	1.81
CHAF1B	204775_at	0.358129	0.87784	0.645628	0.25	1.64	0.590246	0.993177	0.861492	0.5	1.48	0.171348	0.769571	0.479215	0.17	1.37	0.419466	0.95302	0.803157	0.47	1.37
DROSHA	218269_at	0.266182	0.87784	0.607196	0.25	1.46	0.786902	0.993177	0.931785	0.56	1.56	0.18402	0.769571	0.567117	0.25	1.31	0.589415	0.95302	0.873085	0.53	1.43
CHMP1B	218178_s_at	0.202227	0.872577	0.501877	0.17	1.45	0.545718	0.993177	0.848596	0.5	1.45	0.39839	0.769571	0.601269	0.18	1.96	0.401154	0.95302	0.775295	0.43	1.4
GTF2E1	205930_at	0.931962	0.993768	0.958871	0.37	2.51	0.97831	0.993177	1.00839	0.55	1.84	0.843591	0.931917	0.907228	0.34	2.39	0.745614	0.95302	0.901994	0.48	1.68
PEX7	205420_at	0.144766	0.872577	0.231001	0.03	1.66	0.136972	0.993177	0.697427	0.43	1.12	0.381782	0.769571	0.39101	0.05	3.21	0.221826	0.93455	0.736252	0.45	1.2
NEMF	1558675_s_at	0.142382	0.872577	3.61235	0.65	20.09	0.857967	0.993177	1.07123	0.5	2.28	0.0877285	0.769571	4.44437	0.8	24.63	0.703031	0.95302	1.15666	0.55	2.44
SMG9	223188_at	0.500069	0.931675	0.721235	0.28	1.86	0.638263	0.993177	0.78067	0.28	2.19	0.40497	0.769571	0.63728	0.22	1.84	0.873508	0.970039	0.915139	0.31	2.73
POLR1E	218997_at	0.148095	0.872577	1.63865	0.84	3.2	0.298447	0.993177	1.29014	0.8	2.09	0.151213	0.769571	1.64296	0.83	3.24	0.15661	0.93455	1.40881	0.88	2.26
C1D	200056_s_at	0.797677	0.971765	1.21176	0.28	5.26	0.722151	0.993177	0.882454	0.44	1.76	0.86368	0.933789	0.884983	0.22	3.57	0.575933	0.95302	0.828287	0.43	1.6
ZNF587	231820_x_at	0.442014	0.892583	1.40423	0.59	3.34	0.930768	0.993177	0.978644	0.6	1.59	0.628207	0.89174	1.25105	0.51	3.1	0.661666	0.95302	0.89349	0.54	1.48
PAIP1	209063_x_at	0.225609	0.872577	0.578398	0.24	1.4	0.672942	0.993177	0.878082	0.48	1.61	0.159341	0.769571	0.544829	0.23	1.27	0.284038	0.93455	0.705364	0.37	1.34
FRYL	212546_s_at	0.994575	0.995567	0.995565	0.28	3.59	0.31713	0.993177	1.25559	0.8	1.96	0.851392	0.931917	0.872307	0.21	3.64	0.195847	0.93455	1.3547	0.86	2.15
NEDD8	201840_at	0.976301	0.993768	1.01413	0.4	2.56	0.985525	0.99346	1.00671	0.49	2.07	0.370128	0.769571	1.54383	0.6	3.99	0.71698	0.95302	1.14867	0.54	2.43
NBEAL1	1554106_at	0.778591	0.971765	0.87644	0.35	2.2	0.471499	0.993177	0.845745	0.54	1.33	0.80601	0.92872	0.882238	0.32	2.4	0.393218	0.95302	0.797825	0.48	1.34
SRP72	208803_s_at	0.104626	0.872577	0.324585	0.08	1.26	0.778314	0.993177	0.929799	0.56	1.54	0.0747604	0.769571	0.281665	0.07	1.13	0.928997	0.986472	0.976129	0.57	1.66
LPAR2	206723_s_at	0.725479	0.971765	0.793474	0.22	2.89	0.734165	0.993177	1.11238	0.6	2.06	0.847491	0.931917	0.872897	0.22	3.49	0.813795	0.969198	1.08624	0.55	2.16
FBXO33	227521_at	0.969539	0.993768	0.986117	0.48	2.02	0.419146	0.993177	0.761296	0.39	1.48	0.453655	0.769571	1.3123	0.64	2.67	0.574289	0.95302	0.820828	0.41	1.63
LINC00526	229829_at	0.11779	0.872577	0.471554	0.18	1.21	0.0161138	0.993177	0.54599	0.33	0.89	0.332526	0.769571	0.595091	0.21	1.7	0.0115796	0.93455	0.507476	0.3	0.86
FBXO10	227222_at	0.156968	0.872577	1.68489	0.82	3.47	0.286877	0.993177	1.90156	0.58	6.21	0.195496	0.769571	1.60891	0.78	3.31	0.208185	0.93455	2.15294	0.65	7.11
ORMDL1	223187_s_at	0.55227	0.940266	0.600302	0.11	3.23	0.595722	0.993177	0.82164	0.4	1.7	0.558206	0.857747	0.59588	0.11	3.37	0.335174	0.95302	0.694849	0.33	1.46
ZNF271	236231_at	0.462222	0.90477	0.699749	0.27	1.81	0.584923	0.993177	0.887802	0.58	1.36	0.695579	0.92872	0.815248	0.29	2.27	0.975553	0.99285	1.00722	0.64	1.6
HECTD1	242349_at	0.635827	0.966697	1.3071	0.43	3.96	0.366201	0.993177	1.24435	0.77	2	0.155829	0.769571	2.39463	0.72	8	0.233392	0.93455	1.36484	0.82	2.28
HEATR6	218991_at	0.112309	0.872577	0.220053	0.03	1.43	0.954071	0.993177	0.976253	0.43	2.21	0.121485	0.769571	0.237048	0.04	1.47	0.95224	0.992431	0.976217	0.44	2.15
INPP5A	203006_at	0.212786	0.872577	2.133	0.65	7.02	0.238996	0.993177	1.47702	0.77	2.83	0.0958878	0.769571	2.97666	0.82	10.75	0.124964	0.93455	1.75731	0.86	3.61
NUP43	219007_at	0.190554	0.872577	0.255877	0.03	1.97	0.696739	0.993177	0.887949	0.49	1.61	0.431775	0.769571	0.423721	0.05	3.6	0.782604	0.961703	0.913909	0.48	1.73
NDUFB6	203613_s_at	0.465393	0.90477	1.39891	0.57	3.45	0.848847	0.993177	1.04662	0.66	1.67	0.427587	0.769571	1.42908	0.59	3.45	0.755626	0.95302	1.08523	0.65	1.82
LOC100129794	230307_at	0.383097	0.87784	1.41924	0.65	3.12	0.592313	0.993177	0.864676	0.51	1.47	0.104521	0.769571	1.86792	0.88	3.97	0.720169	0.95302	0.906676	0.53	1.55
SLAIN2	224844_at	0.885519	0.993768	1.05525	0.51	2.19	0.992349	0.99553	1.00267	0.58	1.73	0.958638	0.967318	1.02221	0.45	2.34	0.956261	0.99285	0.984181	0.56	1.74
NUMA1	235539_at	0.530027	0.934639	0.714485	0.25	2.04	0.445197	0.993177	1.29071	0.67	2.49	0.817452	0.92872	0.875563	0.28	2.71	0.314761	0.95302	1.43799	0.71	2.92
ERCC1	203719_at	0.721518	0.971765	0.844823	0.33	2.14	0.893222	0.993177	0.962176	0.55	1.69	0.564523	0.857747	0.71613	0.23	2.23	0.728205	0.95302	0.899567	0.5	1.63
TTI2	219124_at	0.286856	0.87784	1.61666	0.67	3.91	0.402823	0.993177	1.25329	0.74	2.13	0.112053	0.769571	2.20907	0.83	5.87	0.359101	0.95302	1.31765	0.73	2.38
PSMG4	228217_s_at	0.926605	0.993768	1.0486	0.38	2.88	0.708724	0.993177	0.92424	0.61	1.4	0.858971	0.931917	1.10085	0.38	3.18	0.572438	0.95302	0.8836	0.57	1.36
NADKD1	229299_at	0.426164	0.87784	0.700031	0.29	1.68	0.25485	0.993177	0.822425	0.59	1.15	0.304432	0.769571	0.6443	0.28	1.49	0.0976866	0.93455	0.743064	0.52	1.06
DNAJA1	200881_s_at	0.338015	0.87784	1.40419	0.7	2.81	0.350613	0.993177	1.23382	0.79	1.92	0.351015	0.769571	1.37382	0.7	2.68	0.134581	0.93455	1.39321	0.9	2.15
RAD1	235253_at	0.401121	0.87784	0.686984	0.29	1.65	0.615144	0.993177	0.895106	0.58	1.38	0.290427	0.769571	0.637243	0.28	1.47	0.315547	0.95302	0.800805	0.52	1.24
ENOSF1	217690_at	0.213243	0.872577	0.533798	0.2	1.43	0.603473	0.993177	0.876739	0.53	1.44	0.386688	0.769571	0.6169	0.21	1.84	0.848847	0.969198	0.951603	0.57	1.58
KLHL42	225963_at	0.670559	0.967937	1.24859	0.45	3.47	0.215513	0.993177	1.27958	0.87	1.89	0.335673	0.769571	1.74048	0.56	5.38	0.282636	0.93455	1.27704	0.82	2
CRAMP1L	225172_at	0.964568	0.993768	1.02975	0.28	3.75	0.915699	0.993177	0.961961	0.47	1.97	0.773283	0.92872	1.23007	0.3	5.03	0.708371	0.95302	0.855052	0.38	1.94
SUB1	224587_at	0.263058	0.87784	0.602673	0.25	1.46	0.556256	0.993177	0.884044	0.59	1.33	0.179761	0.769571	0.561096	0.24	1.31	0.27502	0.93455	0.793324	0.52	1.2
CHMP1B	218177_at	0.202227	0.872577	0.501877	0.17	1.45	0.716437	0.993177	0.898629	0.5	1.6	0.39839	0.769571	0.601269	0.18	1.96	0.565681	0.95302	0.828569	0.44	1.57
GSKIP	223239_at	0.549784	0.940266	1.26975	0.58	2.78	0.240023	0.993177	1.33626	0.82	2.17	0.277424	0.769571	1.60723	0.68	3.78	0.168322	0.93455	1.45211	0.85	2.47
CLTA	1560434_x_at	0.252754	0.87784	1.28482	0.84	1.97	0.977285	0.993177	0.993093	0.62	1.6	0.311307	0.769571	1.24318	0.82	1.89	0.920739	0.986472	1.02382	0.64	1.63
GLRX5	221932_s_at	0.493426	0.931675	1.30845	0.61	2.82	0.53734	0.993177	1.22942	0.64	2.37	0.214626	0.769571	1.70381	0.73	3.95	0.516555	0.95302	1.27912	0.61	2.69
APTX	218527_at	0.271933	0.87784	1.61189	0.69	3.78	0.567135	0.993177	1.15073	0.71	1.86	0.226972	0.769571	1.66812	0.73	3.83	0.402692	0.95302	1.24965	0.74	2.11
PPP2R5C	213305_s_at	0.550053	0.940266	1.27254	0.58	2.8	0.810265	0.993177	0.944913	0.59	1.5	0.324245	0.769571	1.55262	0.65	3.72	0.996326	0.996326	1.0012	0.6	1.67
FAR1	224866_at	0.265172	0.87784	2.38374	0.52	10.99	0.681447	0.993177	1.12478	0.64	1.97	0.158164	0.769571	3.05897	0.65	14.45	0.702683	0.95302	1.11583	0.64	1.96
SNRPD2	200826_at	0.927382	0.993768	1.03832	0.46	2.33	0.633342	0.993177	0.861625	0.47	1.59	0.94884	0.964382	0.968872	0.37	2.55	0.541168	0.95302	0.818787	0.43	1.55
TRAK2	202124_s_at	0.807482	0.971765	0.894452	0.36	2.19	0.659084	0.993177	1.09531	0.73	1.64	0.80845	0.92872	0.884171	0.33	2.39	0.507009	0.95302	1.16632	0.74	1.84
FTSJD2	212380_at	0.968759	0.993768	1.02781	0.26	4.06	0.791543	0.993177	0.908932	0.45	1.85	0.972856	0.977541	0.97695	0.25	3.74	0.630393	0.95302	0.836844	0.41	1.73
PRPSAP1	1556715_at	0.327997	0.87784	0.482866	0.11	2.08	0.127461	0.993177	0.669489	0.4	1.12	0.383844	0.769571	0.531719	0.13	2.2	0.0938692	0.93455	0.63133	0.37	1.08
PRKD2	38269_at	0.504726	0.934175	0.657888	0.19	2.25	0.242055	0.993177	0.633391	0.29	1.36	0.384255	0.769571	0.53221	0.13	2.2	0.258269	0.93455	0.579413	0.22	1.49
PPP2R5C	1554365_a_at	0.550053	0.940266	1.27254	0.58	2.8	0.879115	0.993177	0.965104	0.61	1.53	0.324245	0.769571	1.55262	0.65	3.72	0.93284	0.986472	1.02144	0.62	1.67
SKP2	210567_s_at	0.426164	0.87784	0.700031	0.29	1.68	0.582529	0.993177	0.928962	0.71	1.21	0.304432	0.769571	0.6443	0.28	1.49	0.430084	0.95302	0.901804	0.7	1.17
MAK16	211686_s_at	0.286856	0.87784	1.61666	0.67	3.91	0.350286	0.993177	1.2579	0.78	2.04	0.112053	0.769571	2.20907	0.83	5.87	0.254372	0.93455	1.35801	0.8	2.3
GPATCH1	219818_s_at	0.371793	0.87784	0.612754	0.21	1.8	0.261603	0.993177	0.647583	0.3	1.38	0.297073	0.769571	0.552477	0.18	1.69	0.177502	0.93455	0.57283	0.25	1.29
HDAC1	201209_at	0.0980835	0.872577	0.229834	0.04	1.31	0.290026	0.993177	0.722889	0.4	1.32	0.101684	0.769571	0.193764	0.03	1.38	0.189019	0.93455	0.629752	0.32	1.26
CDS2	212864_at	0.666334	0.966697	0.794001	0.28	2.27	0.727626	0.993177	0.89236	0.47	1.69	0.569963	0.863915	0.731022	0.25	2.15	0.724031	0.95302	0.894719	0.48	1.66
POLR2I	212955_s_at	0.435172	0.887353	0.651685	0.22	1.91	0.542316	0.993177	0.838665	0.48	1.48	0.354847	0.769571	0.596791	0.2	1.78	0.508453	0.95302	0.819989	0.46	1.48
USP47	221518_s_at	0.0259703	0.872577	4.49988	1.2	16.91	0.323756	0.993177	1.35694	0.74	2.49	0.0141441	0.737849	5.64144	1.42	22.47	0.373329	0.95302	1.31184	0.72	2.38
TOX4	201685_s_at	0.810012	0.971765	0.909262	0.42	1.97	0.809991	0.993177	1.08742	0.55	2.15	0.627291	0.89174	1.20891	0.56	2.6	0.494577	0.95302	1.27583	0.63	2.57
ZNF780B	242969_at	0.943358	0.993768	1.02644	0.5	2.11	0.661289	0.993177	1.09846	0.72	1.67	0.900206	0.945518	0.952123	0.44	2.05	0.876963	0.970039	1.03915	0.64	1.69
PAK4	203154_s_at	0.565957	0.94069	0.822745	0.42	1.6	0.778525	0.993177	0.909394	0.47	1.76	0.33918	0.769571	0.712281	0.36	1.43	0.67442	0.95302	0.866947	0.45	1.69
KIAA1432	223826_s_at	0.11368	0.872577	1.43998	0.92	2.26	0.157979	0.993177	1.38326	0.88	2.17	0.228244	0.769571	1.31351	0.84	2.05	0.152598	0.93455	1.39881	0.88	2.22
MIPOL1	1552572_a_at	0.65351	0.966697	1.14544	0.63	2.07	0.815757	0.993177	0.946974	0.6	1.5	0.233453	0.769571	1.43274	0.79	2.59	0.622328	0.95302	1.13334	0.69	1.86
MARK4	55065_at	0.721518	0.971765	0.844823	0.33	2.14	0.563434	0.993177	1.19846	0.65	2.21	0.564523	0.857747	0.71613	0.23	2.23	0.682257	0.95302	1.15734	0.57	2.33
MRPS30	227600_at	0.18078	0.872577	0.55218	0.23	1.32	0.810097	0.993177	0.951306	0.63	1.43	0.117792	0.769571	0.50962	0.22	1.19	0.400022	0.95302	0.841424	0.56	1.26
AKT2	225471_s_at	0.943358	0.993768	1.02644	0.5	2.11	0.541638	0.993177	0.821959	0.44	1.54	0.900206	0.945518	0.952123	0.44	2.05	0.3438	0.95302	0.708013	0.35	1.45
ZNF133	216960_s_at	0.844151	0.985893	0.903451	0.33	2.49	0.915747	0.993177	0.963797	0.49	1.91	0.532399	0.837391	0.709492	0.24	2.08	0.569737	0.95302	0.807208	0.39	1.69
AP4S1	210278_s_at	0.635827	0.966697	1.3071	0.43	3.96	0.388008	0.993177	1.18717	0.8	1.75	0.155829	0.769571	2.39463	0.72	8	0.27355	0.93455	1.25683	0.83	1.89
FBXO46	205310_at	0.927382	0.993768	1.03832	0.46	2.33	0.562424	0.993177	0.855861	0.51	1.45	0.94884	0.964382	0.968872	0.37	2.55	0.4006	0.95302	0.784927	0.45	1.38
MED10	223247_at	0.325398	0.87784	0.641331	0.26	1.55	0.863252	0.993177	1.04259	0.65	1.68	0.196761	0.769571	0.560131	0.23	1.35	0.847226	0.969198	0.954253	0.59	1.54
LOC100129250	78383_at	0.465393	0.90477	1.39891	0.57	3.45	0.372714	0.993177	0.796371	0.48	1.31	0.427587	0.769571	1.42908	0.59	3.45	0.283406	0.93455	0.752304	0.45	1.27
MTMR12	225232_at	0.331744	0.87784	0.647259	0.27	1.56	0.109004	0.993177	0.656133	0.39	1.1	0.22582	0.769571	0.596255	0.26	1.38	0.0460101	0.93455	0.596756	0.36	0.99
ALKBH1	205621_at	0.054233	0.872577	3.69136	0.98	13.95	0.541171	0.993177	1.25661	0.6	2.61	0.0267628	0.769571	5.31086	1.21	23.27	0.329901	0.95302	1.46515	0.68	3.16
ATG14	204568_at	0.0680237	0.872577	5.97658	0.88	40.78	0.247236	0.993177	1.47257	0.76	2.84	0.0221801	0.769571	9.37359	1.38	63.79	0.186008	0.93455	1.57319	0.8	3.08
FADD	202535_at	0.571727	0.94069	1.06299	0.86	1.31	0.119204	0.993177	1.28343	0.94	1.76	0.319818	0.769571	1.1155	0.9	1.38	0.0541553	0.93455	1.38328	0.99	1.92
KIAA0020	203712_at	0.406591	0.87784	1.61588	0.52	5.02	0.161418	0.993177	1.38715	0.88	2.19	0.371194	0.769571	1.69319	0.53	5.37	0.143015	0.93455	1.43675	0.88	2.33
CYP2R1	227109_at	0.178638	0.872577	2.70461	0.63	11.53	0.485908	0.993177	1.23548	0.68	2.24	0.0971346	0.769571	3.50401	0.8	15.42	0.397419	0.95302	1.30323	0.71	2.41
VKORC1L1	224881_at	0.368365	0.87784	0.599418	0.2	1.83	0.298878	0.993177	0.786915	0.5	1.24	0.207144	0.769571	0.459131	0.14	1.54	0.151081	0.93455	0.667809	0.38	1.16
PUS7L	229751_s_at	0.209597	0.872577	0.266438	0.03	2.1	0.235298	0.993177	0.716967	0.41	1.24	0.227468	0.769571	0.262466	0.03	2.3	0.197143	0.93455	0.692385	0.4	1.21
ZNF446	219900_s_at	0.209846	0.872577	0.590314	0.26	1.35	0.540574	0.993177	0.755382	0.31	1.86	0.0779271	0.769571	0.465344	0.2	1.09	0.209297	0.93455	0.532969	0.2	1.42
NDUFS6	203606_at	0.686816	0.971765	0.848162	0.38	1.89	0.800545	0.993177	0.93414	0.55	1.58	0.485295	0.780962	0.752709	0.34	1.67	0.743021	0.95302	0.917591	0.55	1.53
CSRP2BP	225432_s_at	0.844151	0.985893	0.903451	0.33	2.49	0.699151	0.993177	0.903845	0.54	1.51	0.532399	0.837391	0.709492	0.24	2.08	0.26733	0.93455	0.728699	0.42	1.27
WHAMM	228953_at	0.936333	0.993768	0.947306	0.25	3.58	0.609639	0.993177	1.15516	0.66	2.01	0.946352	0.964382	1.04779	0.27	4.08	0.58644	0.95302	1.16124	0.68	1.99
SMCHD1	212577_at	0.122871	0.872577	0.420524	0.14	1.26	0.32468	0.993177	0.792544	0.5	1.26	0.367708	0.769571	0.569317	0.17	1.94	0.626555	0.95302	0.883325	0.54	1.46
NIPBL	212469_at	0.422693	0.87784	0.697263	0.29	1.68	0.765392	0.993177	0.904163	0.47	1.75	0.295495	0.769571	0.637335	0.27	1.48	0.655296	0.95302	0.8642	0.46	1.64
NELFB	202757_at	0.969983	0.993768	1.02323	0.31	3.38	0.817247	0.993177	1.07685	0.57	2.02	0.819624	0.929502	1.1608	0.32	4.18	0.537473	0.95302	1.23162	0.64	2.39
RNF121	219021_at	0.530027	0.934639	0.714485	0.25	2.04	0.263417	0.993177	0.645195	0.3	1.39	0.817452	0.92872	0.875563	0.28	2.71	0.308081	0.95302	0.641268	0.27	1.51
CAND1	243910_x_at	0.313539	0.87784	1.26646	0.8	2	0.235131	0.993177	1.36226	0.82	2.27	0.33315	0.769571	1.24106	0.8	1.92	0.267812	0.93455	1.30622	0.81	2.1
SPIN1	222431_at	0.612035	0.966697	1.50955	0.31	7.41	0.860236	0.993177	1.07299	0.49	2.35	0.724425	0.92872	1.34702	0.26	7.06	0.663176	0.95302	0.823397	0.34	1.97
NUP54	218256_s_at	0.0754822	0.872577	0.282259	0.07	1.14	0.297209	0.993177	0.732949	0.41	1.31	0.0444538	0.769571	0.240728	0.06	0.97	0.196374	0.93455	0.678277	0.38	1.22
ANKRD27	221522_at	0.209609	0.872577	0.488594	0.16	1.5	0.775689	0.993177	0.935039	0.59	1.48	0.15919	0.769571	0.431291	0.13	1.39	0.645263	0.95302	0.8925	0.55	1.45
MTMR4	212277_at	0.303946	0.87784	0.379012	0.06	2.41	0.317222	0.993177	0.73707	0.41	1.34	0.301206	0.769571	0.389064	0.06	2.33	0.341181	0.95302	0.744016	0.4	1.37
MTMR4	214268_s_at	0.303946	0.87784	0.379012	0.06	2.41	0.495468	0.993177	0.807398	0.44	1.49	0.301206	0.769571	0.389064	0.06	2.33	0.341684	0.95302	0.743261	0.4	1.37
STRN3	204496_at	0.635827	0.966697	1.3071	0.43	3.96	0.6023	0.993177	1.15076	0.68	1.95	0.155829	0.769571	2.39463	0.72	8	0.482729	0.95302	1.21857	0.7	2.12
PAPD7	202466_at	0.325398	0.87784	0.641331	0.26	1.55	0.515889	0.993177	0.841188	0.5	1.42	0.196761	0.769571	0.560131	0.23	1.35	0.240598	0.93455	0.725003	0.42	1.24
SHB	1557458_s_at	0.189267	0.872577	1.68663	0.77	3.68	0.0244306	0.993177	1.50508	1.05	2.15	0.15062	0.769571	1.75453	0.82	3.78	0.044186	0.93455	1.42941	1.01	2.02
PRPF4B	202127_at	0.814979	0.971765	0.875795	0.29	2.66	0.811683	0.993177	0.949014	0.62	1.46	0.882894	0.941639	0.917348	0.29	2.89	0.600753	0.95302	0.888136	0.57	1.38
EXOSC3	233495_at	0.108234	0.872577	1.9408	0.86	4.36	0.559121	0.993177	1.24545	0.6	2.6	0.129723	0.769571	1.84684	0.84	4.08	0.553771	0.95302	1.24835	0.6	2.6
DEDD2	225434_at	0.872706	0.993768	0.917906	0.32	2.62	0.926489	0.993177	1.02521	0.6	1.74	0.663424	0.909794	0.776555	0.25	2.43	0.960911	0.99285	1.01427	0.58	1.79
ABT1	218405_at	0.154214	0.872577	0.253367	0.04	1.67	0.18903	0.993177	0.607894	0.29	1.28	0.172184	0.769571	0.271063	0.04	1.77	0.0814282	0.93455	0.483786	0.21	1.09
USP36	227093_at	0.345543	0.87784	0.506891	0.12	2.08	0.902211	0.993177	1.03555	0.59	1.81	0.439182	0.769571	0.58259	0.15	2.29	0.972132	0.99285	1.00967	0.59	1.73
PCMT1	208857_s_at	0.190554	0.872577	0.255877	0.03	1.97	0.534068	0.993177	0.813272	0.42	1.56	0.431775	0.769571	0.423721	0.05	3.6	0.719309	0.95302	0.884962	0.45	1.72
EXOSC3	223490_s_at	0.108234	0.872577	1.9408	0.86	4.36	0.470789	0.993177	1.15617	0.78	1.72	0.129723	0.769571	1.84684	0.84	4.08	0.537894	0.95302	1.13514	0.76	1.7
G2E3	223255_at	0.91276	0.993768	1.0693	0.32	3.55	0.626467	0.993177	1.11688	0.72	1.74	0.336408	0.769571	1.88666	0.52	6.88	0.624709	0.95302	1.12579	0.7	1.81
HLCS	209399_at	0.39047	0.87784	0.671014	0.27	1.67	0.739821	0.993177	0.863148	0.36	2.06	0.182389	0.769571	0.492108	0.17	1.4	0.574818	0.95302	0.790205	0.35	1.8
LINC00667	228160_at	0.11779	0.872577	0.471554	0.18	1.21	0.217879	0.993177	0.815883	0.59	1.13	0.332526	0.769571	0.595091	0.21	1.7	0.520181	0.95302	0.885079	0.61	1.28
SIM2	208157_at	0.39047	0.87784	0.671014	0.27	1.67	0.8788	0.993177	0.960298	0.57	1.62	0.182389	0.769571	0.492108	0.17	1.4	0.783709	0.961703	0.932451	0.57	1.54
CTR9	202060_at	0.0896585	0.872577	3.39058	0.83	13.89	0.173952	0.993177	1.66434	0.8	3.47	0.0538921	0.769571	4.1737	0.98	17.84	0.118518	0.93455	1.82413	0.86	3.88
FRYL	212548_s_at	0.994575	0.995567	0.995565	0.28	3.59	0.748369	0.993177	1.07669	0.69	1.69	0.851392	0.931917	0.872307	0.21	3.64	0.660865	0.95302	1.11095	0.69	1.78
COPB1	201358_s_at	0.178638	0.872577	2.70461	0.63	11.53	0.80254	0.993177	1.10234	0.51	2.37	0.0971346	0.769571	3.50401	0.8	15.42	0.981771	0.99285	0.990526	0.44	2.24
EXOSC5	218481_at	0.812513	0.971765	1.09742	0.51	2.37	0.469783	0.993177	1.15971	0.78	1.73	0.929705	0.959363	0.964353	0.43	2.16	0.85271	0.970039	1.04291	0.67	1.63
MAEA	207922_s_at	0.891591	0.993768	0.896061	0.18	4.34	0.574197	0.993177	0.823284	0.42	1.62	0.39827	0.769571	0.484423	0.09	2.6	0.283958	0.93455	0.684588	0.34	1.37
ZNF45	222028_at	0.500069	0.931675	0.721235	0.28	1.86	0.915868	0.993177	0.972146	0.58	1.64	0.40497	0.769571	0.63728	0.22	1.84	0.763623	0.954147	0.918068	0.53	1.6
DCTN6	203261_at	0.0731775	0.872577	3.46938	0.89	13.53	0.224727	0.993177	1.50548	0.78	2.91	0.0279023	0.769571	5.39969	1.2	24.28	0.185409	0.93455	1.62691	0.79	3.34
NOTCH2	202445_s_at	0.521346	0.934639	1.40996	0.49	4.03	0.959947	0.993177	1.0194	0.48	2.16	0.397278	0.769571	1.6061	0.54	4.81	0.796722	0.966565	1.10729	0.51	2.4
ZBED4	204799_at	0.338085	0.87784	1.99925	0.48	8.25	0.733846	0.993177	0.891739	0.46	1.73	0.151075	0.769571	2.7423	0.69	10.87	0.693224	0.95302	0.870448	0.44	1.73
DCAF10	230679_at	0.108234	0.872577	1.9408	0.86	4.36	0.294289	0.993177	1.22343	0.84	1.78	0.129723	0.769571	1.84684	0.84	4.08	0.395955	0.95302	1.17999	0.81	1.73
LYRM4	218561_s_at	0.852148	0.993379	0.903343	0.31	2.63	0.637694	0.993177	0.898877	0.58	1.4	0.854225	0.931917	0.899194	0.29	2.79	0.849183	0.969198	0.955478	0.6	1.53
TMEM161A	43977_at	0.772455	0.971765	0.827812	0.23	2.98	0.448432	0.993177	1.30244	0.66	2.58	0.876251	0.941639	0.896819	0.23	3.53	0.386994	0.95302	1.37656	0.67	2.84
TTC33	219421_at	0.370627	0.87784	0.669729	0.28	1.61	0.462385	0.993177	0.834356	0.51	1.35	0.252515	0.769571	0.611998	0.26	1.42	0.220214	0.93455	0.73372	0.45	1.2
CCDC115	224946_s_at	0.330946	0.87784	2.3092	0.43	12.48	0.934511	0.993177	1.02353	0.59	1.78	0.466314	0.769571	1.84456	0.36	9.58	0.821158	0.969198	0.938236	0.54	1.63
ANKRD12	212286_at	0.245259	0.87784	0.536821	0.19	1.53	0.368347	0.993177	0.797875	0.49	1.3	0.470519	0.769571	0.650788	0.2	2.09	0.702752	0.95302	0.898275	0.52	1.56
SKP2	203625_x_at	0.426164	0.87784	0.700031	0.29	1.68	0.7128	0.993177	0.934508	0.65	1.34	0.304432	0.769571	0.6443	0.28	1.49	0.312376	0.95302	0.826899	0.57	1.2
TGIF1	203313_s_at	0.086747	0.872577	0.381076	0.13	1.15	0.598687	0.993177	0.880404	0.55	1.41	0.205487	0.769571	0.456326	0.14	1.54	0.466645	0.95302	0.817193	0.47	1.41
ANKRD17	212211_at	0.0624432	0.872577	0.240338	0.05	1.08	0.255079	0.993177	0.691248	0.37	1.31	0.054413	0.769571	0.243855	0.06	1.03	0.473386	0.95302	0.796764	0.43	1.48
VTI1B	209452_s_at	0.0444013	0.872577	5.25033	1.04	26.45	0.228369	0.993177	1.6171	0.74	3.53	0.0160771	0.769571	7.62458	1.46	39.86	0.106425	0.93455	1.9392	0.87	4.33
CEP76	219311_at	0.188395	0.872577	0.487105	0.17	1.42	0.156649	0.993177	0.729578	0.47	1.13	0.375052	0.769571	0.58258	0.18	1.92	0.213474	0.93455	0.74006	0.46	1.19
MTRR	203199_s_at	0.241605	0.87784	0.5906	0.24	1.43	0.420568	0.993177	0.837513	0.54	1.29	0.123261	0.769571	0.498669	0.21	1.21	0.367065	0.95302	0.813932	0.52	1.27
YBX1	208628_s_at	0.180595	0.872577	0.278569	0.04	1.81	0.396205	0.993177	0.719796	0.34	1.54	0.219384	0.769571	0.275096	0.04	2.16	0.844965	0.969198	0.923623	0.42	2.05
MRPL18	217907_at	0.372679	0.87784	0.422971	0.06	2.8	0.717231	0.993177	0.877466	0.43	1.78	0.826624	0.931917	0.80084	0.11	5.84	0.8025	0.969198	0.908622	0.43	1.93
GOLPH3	217803_at	0.10305	0.872577	0.457073	0.18	1.17	0.243028	0.993177	0.692753	0.37	1.28	0.109183	0.769571	0.488218	0.2	1.17	0.117756	0.93455	0.603218	0.32	1.14
WDR70	219193_at	0.422693	0.87784	0.697263	0.29	1.68	0.84453	0.993177	0.941279	0.51	1.72	0.295495	0.769571	0.637335	0.27	1.48	0.541799	0.95302	0.831179	0.46	1.51
SNX5	222417_s_at	0.844151	0.985893	0.903451	0.33	2.49	0.904865	0.993177	1.03009	0.63	1.68	0.532399	0.837391	0.709492	0.24	2.08	0.927113	0.986472	1.02361	0.62	1.69
IFT140	204792_s_at	0.964568	0.993768	1.02975	0.28	3.75	0.669987	0.993177	0.878284	0.48	1.6	0.773283	0.92872	1.23007	0.3	5.03	0.780028	0.961703	1.08478	0.61	1.92
NNT	202783_at	0.210542	0.872577	0.570663	0.24	1.37	0.0267511	0.993177	0.590168	0.37	0.94	0.138481	0.769571	0.527748	0.23	1.23	0.00780427	0.93455	0.531099	0.33	0.85
PDCD5	227751_at	0.439784	0.892583	0.641258	0.21	1.98	0.53649	0.993177	0.896809	0.63	1.27	0.324382	0.769571	0.55622	0.17	1.79	0.27106	0.93455	0.818881	0.57	1.17
PEX7	211033_s_at	0.144766	0.872577	0.231001	0.03	1.66	0.331858	0.993177	0.750997	0.42	1.34	0.381782	0.769571	0.39101	0.05	3.21	0.489212	0.95302	0.809846	0.45	1.47
MRPL13	218049_s_at	0.429657	0.881853	1.46025	0.57	3.74	0.432787	0.993177	1.20225	0.76	1.9	0.556135	0.857747	1.3296	0.51	3.43	0.579107	0.95302	1.14446	0.71	1.84
PPP1R37	229262_at	0.721518	0.971765	0.844823	0.33	2.14	0.899472	0.993177	1.0394	0.57	1.89	0.564523	0.857747	0.71613	0.23	2.23	0.982198	0.99285	1.00815	0.49	2.06
ELP2	231713_s_at	0.279912	0.87784	0.513967	0.15	1.72	0.868172	0.993177	1.04236	0.64	1.7	0.445071	0.769571	0.601076	0.16	2.22	0.617079	0.95302	1.13704	0.69	1.88
SMG9	221335_x_at	0.500069	0.931675	0.721235	0.28	1.86	0.634986	0.993177	1.22399	0.53	2.82	0.40497	0.769571	0.63728	0.22	1.84	0.46762	0.95302	1.38718	0.57	3.35
SNW1	215424_s_at	0.054233	0.872577	3.69136	0.98	13.95	0.0707668	0.993177	1.96332	0.94	4.08	0.0267628	0.769571	5.31086	1.21	23.27	0.0605682	0.93455	2.20966	0.97	5.06
FAM173B	225670_at	0.295071	0.87784	0.620924	0.25	1.52	0.437252	0.993177	0.803541	0.46	1.4	0.163913	0.769571	0.53375	0.22	1.29	0.27626	0.93455	0.733219	0.42	1.28
SF3B5	221263_s_at	0.0931561	0.872577	0.183516	0.03	1.33	0.022254	0.993177	0.462809	0.24	0.9	0.246525	0.769571	0.279387	0.03	2.41	0.0572103	0.93455	0.52	0.27	1.02
C18orf21	223526_at	0.290196	0.87784	0.525092	0.16	1.73	0.657149	0.993177	0.891438	0.54	1.48	0.472297	0.769943	0.622649	0.17	2.27	0.733342	0.95302	1.09818	0.64	1.88
SRP72	208802_at	0.104626	0.872577	0.324585	0.08	1.26	0.653849	0.993177	0.881856	0.51	1.53	0.0747604	0.769571	0.281665	0.07	1.13	0.520265	0.95302	0.824036	0.46	1.49
NFKBIB	214448_x_at	0.661613	0.966697	0.86093	0.44	1.68	0.812482	0.993177	0.90754	0.41	2.02	0.393088	0.769571	0.736356	0.36	1.49	0.531418	0.95302	0.762543	0.33	1.78
COX18	227442_at	0.0624432	0.872577	0.240338	0.05	1.08	0.182396	0.993177	0.683438	0.39	1.2	0.054413	0.769571	0.243855	0.06	1.03	0.214717	0.93455	0.694087	0.39	1.24
KATNA1	205526_s_at	0.190554	0.872577	0.255877	0.03	1.97	0.378472	0.993177	0.737231	0.37	1.45	0.431775	0.769571	0.423721	0.05	3.6	0.329764	0.95302	0.709735	0.36	1.41
NDUFAF5	222894_x_at	0.839217	0.985893	0.898527	0.32	2.53	0.802497	0.993177	1.06509	0.65	1.75	0.543336	0.84518	0.707432	0.23	2.16	0.821531	0.969198	0.932622	0.51	1.71
NUP85	218014_at	0.265185	0.87784	0.438233	0.1	1.87	0.739082	0.993177	0.902827	0.49	1.65	0.305793	0.769571	0.480228	0.12	1.95	0.531019	0.95302	0.818081	0.44	1.53
PIGP	221689_s_at	0.371463	0.87784	0.655964	0.26	1.65	0.601927	0.993177	1.12789	0.72	1.77	0.170508	0.769571	0.47235	0.16	1.38	0.756377	0.95302	1.07561	0.68	1.7
DDX24	200694_s_at	0.0231571	0.872577	4.44601	1.23	16.12	0.0640953	0.993177	2.0552	0.96	4.41	0.0101459	0.737849	6.49332	1.56	27.03	0.0288366	0.93455	2.59279	1.1	6.09
AFG3L2	202486_at	0.188395	0.872577	0.487105	0.17	1.42	0.65157	0.993177	0.878601	0.5	1.54	0.375052	0.769571	0.58258	0.18	1.92	0.932694	0.986472	0.973819	0.53	1.8
ZNF839	221709_s_at	0.540987	0.940266	1.27519	0.58	2.78	0.259227	0.993177	1.41513	0.77	2.59	0.321168	0.769571	1.55036	0.65	3.69	0.137249	0.93455	1.691	0.85	3.38
LOC100129250	221979_at	0.465393	0.90477	1.39891	0.57	3.45	0.247845	0.993177	0.749058	0.46	1.22	0.427587	0.769571	1.42908	0.59	3.45	0.168218	0.93455	0.703036	0.43	1.16
TUBGCP2	202477_s_at	0.212786	0.872577	2.133	0.65	7.02	0.119373	0.993177	1.95687	0.84	4.55	0.0958878	0.769571	2.97666	0.82	10.75	0.0177813	0.93455	2.97526	1.21	7.33
MGC2752	230528_s_at	0.209846	0.872577	0.590314	0.26	1.35	0.577106	0.993177	1.09956	0.79	1.53	0.0779271	0.769571	0.465344	0.2	1.09	0.943249	0.990345	1.01342	0.7	1.46
RAD1	210216_x_at	0.401121	0.87784	0.686984	0.29	1.65	0.917754	0.993177	0.971851	0.57	1.67	0.290427	0.769571	0.637243	0.28	1.47	0.7478	0.95302	0.916237	0.54	1.56
SUB1	214512_s_at	0.263058	0.87784	0.602673	0.25	1.46	0.389549	0.993177	0.757678	0.4	1.43	0.179761	0.769571	0.561096	0.24	1.31	0.291106	0.937816	0.720274	0.39	1.32
GMPR2	217990_at	0.976301	0.993768	1.01413	0.4	2.56	0.956325	0.993177	1.01794	0.54	1.92	0.370128	0.769571	1.54383	0.6	3.99	0.807811	0.969198	1.08397	0.57	2.08
TARS	201263_at	0.227205	0.872577	0.574769	0.23	1.41	0.823276	0.993177	1.05702	0.65	1.72	0.154312	0.769571	0.536259	0.23	1.26	0.864823	0.970039	1.04217	0.65	1.68
MRPS30	218398_at	0.18078	0.872577	0.55218	0.23	1.32	0.398607	0.993177	0.806086	0.49	1.33	0.117792	0.769571	0.50962	0.22	1.19	0.17107	0.93455	0.698257	0.42	1.17
PPP4R1	201594_s_at	0.245259	0.87784	0.536821	0.19	1.53	0.344732	0.993177	1.23189	0.8	1.9	0.470519	0.769571	0.650788	0.2	2.09	0.102921	0.93455	1.49123	0.92	2.41
DYNC1H1	211928_at	0.550053	0.940266	1.27254	0.58	2.8	0.231389	0.993177	1.31609	0.84	2.06	0.324245	0.769571	1.55262	0.65	3.72	0.0682021	0.93455	1.58738	0.97	2.61
DYRK2	202968_s_at	0.128603	0.872577	1.43213	0.9	2.28	0.966759	0.993177	1.01317	0.55	1.87	0.213401	0.769571	1.3267	0.85	2.07	0.732007	0.95302	0.898596	0.49	1.66
U2AF1L4	226700_at	0.3986	0.87784	0.629987	0.22	1.84	0.930458	0.993177	1.03779	0.45	2.39	0.318173	0.769571	0.569186	0.19	1.72	0.717762	0.95302	0.841568	0.33	2.14
IRGQ	64488_at	0.526467	0.934639	0.73791	0.29	1.89	0.130573	0.993177	0.458825	0.17	1.26	0.42026	0.769571	0.646182	0.22	1.87	0.0957503	0.93455	0.41064	0.14	1.17
PPAPDC1B	223568_s_at	0.41019	0.87784	0.85572	0.59	1.24	0.257941	0.993177	0.838192	0.62	1.14	0.754985	0.92872	0.940778	0.64	1.38	0.334067	0.95302	0.855337	0.62	1.17
ZNF397	235271_s_at	0.462222	0.90477	0.699749	0.27	1.81	0.388227	0.993177	0.792277	0.47	1.34	0.695579	0.92872	0.815248	0.29	2.27	0.388441	0.95302	0.78254	0.45	1.37
MIPOL1	244246_at	0.65351	0.966697	1.14544	0.63	2.07	0.566769	0.993177	1.08796	0.82	1.45	0.233453	0.769571	1.43274	0.79	2.59	0.334527	0.95302	1.16856	0.85	1.6
SIN3B	39705_at	0.225976	0.872577	0.426356	0.11	1.69	0.862611	0.993177	0.934846	0.44	2.01	0.347545	0.769571	0.509469	0.12	2.08	0.785032	0.961703	0.891502	0.39	2.03
NCOA6	208979_at	0.41959	0.87784	1.71373	0.46	6.34	0.719045	0.993177	1.13407	0.57	2.25	0.664179	0.909794	1.3418	0.36	5.06	0.938351	0.990345	1.02929	0.5	2.14
AFG3L2	1557820_at	0.188395	0.872577	0.487105	0.17	1.42	0.837119	0.993177	0.945328	0.55	1.62	0.375052	0.769571	0.58258	0.18	1.92	0.872832	0.970039	1.0498	0.58	1.9
HEATR6	65493_at	0.112309	0.872577	0.220053	0.03	1.43	0.908694	0.993177	1.03861	0.54	1.98	0.121485	0.769571	0.237048	0.04	1.47	0.98947	0.994235	1.00452	0.51	1.96
UBAC1	202151_s_at	0.888389	0.993768	1.08845	0.33	3.56	0.94434	0.993177	1.02305	0.54	1.94	0.734933	0.92872	1.24496	0.35	4.43	0.718942	0.95302	0.884065	0.45	1.73
METTL16	226744_at	0.889062	0.993768	0.928302	0.33	2.64	0.514721	0.993177	0.810302	0.43	1.53	0.709533	0.92872	0.812529	0.27	2.42	0.320819	0.95302	0.709224	0.36	1.4
CEP95	225705_at	0.774598	0.971765	0.798615	0.17	3.72	0.619732	0.993177	0.864184	0.49	1.54	0.641319	0.904203	0.699717	0.16	3.14	0.453464	0.95302	0.803214	0.45	1.42
ADD1	208030_s_at	0.891591	0.993768	0.896061	0.18	4.34	0.743919	0.993177	0.857542	0.34	2.16	0.39827	0.769571	0.484423	0.09	2.6	0.612187	0.95302	0.783292	0.3	2.01
IRGQ	221877_at	0.526467	0.934639	0.73791	0.29	1.89	0.100597	0.993177	0.393335	0.13	1.2	0.42026	0.769571	0.646182	0.22	1.87	0.0774995	0.93455	0.350647	0.11	1.12
BAG5	202985_s_at	0.145651	0.872577	2.07245	0.78	5.53	0.261093	0.993177	1.36006	0.8	2.33	0.106515	0.769571	2.50006	0.82	7.61	0.267513	0.93455	1.41677	0.77	2.62
ZBTB42	229691_at	0.754135	0.971765	0.909552	0.5	1.65	0.558397	0.993177	0.881142	0.58	1.35	0.858353	0.931917	1.059	0.56	1.99	0.666437	0.95302	0.905648	0.58	1.42
TOMM70A	201519_at	0.872854	0.993768	1.08365	0.41	2.9	0.559598	0.993177	1.19719	0.65	2.19	0.846637	0.931917	0.906718	0.34	2.45	0.924347	0.986472	0.969952	0.52	1.82
SLAIN2	224843_at	0.885519	0.993768	1.05525	0.51	2.19	0.936458	0.993177	0.98082	0.61	1.58	0.958638	0.967318	1.02221	0.45	2.34	0.968009	0.99285	0.990156	0.61	1.61
SMU1	233946_at	0.338015	0.87784	1.40419	0.7	2.81	0.831831	0.993177	1.06311	0.6	1.87	0.351015	0.769571	1.37382	0.7	2.68	0.923167	0.986472	1.0285	0.58	1.82
SEC16A	215696_s_at	0.888389	0.993768	1.08845	0.33	3.56	0.934997	0.993177	1.03052	0.5	2.12	0.734933	0.92872	1.24496	0.35	4.43	0.959344	0.99285	1.01968	0.48	2.16
SPTLC1	202277_at	0.560663	0.940266	1.59389	0.33	7.66	0.27632	0.993177	1.54714	0.71	3.39	0.666869	0.911484	1.4314	0.28	7.33	0.719649	0.95302	1.17199	0.49	2.79
GART	212378_at	0.634634	0.966697	0.724502	0.19	2.74	0.433541	0.993177	1.17551	0.78	1.76	0.284588	0.769571	0.45679	0.11	1.92	0.665881	0.95302	1.0945	0.73	1.65
C9orf156	222195_s_at	0.582635	0.94069	1.59103	0.3	8.34	0.91851	0.993177	0.955665	0.4	2.28	0.59053	0.875242	1.57795	0.3	8.31	0.969048	0.99285	1.01716	0.43	2.4
LONP2	223098_s_at	0.0472656	0.872577	2.87652	1.01	8.17	0.0273777	0.993177	1.6684	1.06	2.63	0.0634384	0.769571	2.69877	0.95	7.7	0.0450307	0.93455	1.62015	1.01	2.6
PAIP1	210283_x_at	0.225609	0.872577	0.578398	0.24	1.4	0.534256	0.993177	0.826797	0.45	1.51	0.159341	0.769571	0.544829	0.23	1.27	0.209796	0.93455	0.667096	0.35	1.26
NADKD1	226946_at	0.426164	0.87784	0.700031	0.29	1.68	0.312214	0.993177	0.816886	0.55	1.21	0.304432	0.769571	0.6443	0.28	1.49	0.224024	0.93455	0.783449	0.53	1.16
BRMS1L	226580_at	0.978015	0.993768	1.01128	0.46	2.25	0.901737	0.993177	0.969553	0.59	1.58	0.380751	0.769571	1.43079	0.64	3.19	0.888364	0.977357	1.03984	0.6	1.79
YBX1	208627_s_at	0.180595	0.872577	0.278569	0.04	1.81	0.380277	0.993177	0.761468	0.41	1.4	0.219384	0.769571	0.275096	0.04	2.16	0.659106	0.95302	0.869451	0.47	1.62
IRGQ	1555833_a_at	0.526467	0.934639	0.73791	0.29	1.89	0.175581	0.993177	0.545496	0.23	1.31	0.42026	0.769571	0.646182	0.22	1.87	0.100402	0.93455	0.452377	0.18	1.17
CYP20A1	219565_at	0.778591	0.971765	0.87644	0.35	2.2	0.720032	0.993177	0.894539	0.49	1.65	0.80601	0.92872	0.882238	0.32	2.4	0.719935	0.95302	0.884917	0.45	1.73
TSEN54	241402_at	0.360008	0.87784	0.515128	0.12	2.13	0.833872	0.993177	0.938902	0.52	1.69	0.410659	0.769571	0.560958	0.14	2.22	0.958544	0.99285	0.985227	0.56	1.73
PPIL3	224364_s_at	0.807482	0.971765	0.894452	0.36	2.19	0.497331	0.993177	0.841961	0.51	1.38	0.80845	0.92872	0.884171	0.33	2.39	0.27253	0.93455	0.741751	0.44	1.26
TMEM19	226860_at	0.00143973	0.180254	2.71715	1.47	5.02	0.115061	0.993177	1.468	0.91	2.37	0.0119405	0.737849	2.28214	1.2	4.34	0.110622	0.93455	1.44901	0.92	2.29
SLAIN2	224853_at	0.885519	0.993768	1.05525	0.51	2.19	0.629969	0.993177	0.90247	0.59	1.37	0.958638	0.967318	1.02221	0.45	2.34	0.484909	0.95302	0.854211	0.55	1.33
TECPR2	204308_s_at	0.540987	0.940266	1.27519	0.58	2.78	0.436104	0.993177	1.22611	0.73	2.05	0.321168	0.769571	1.55036	0.65	3.69	0.224756	0.93455	1.40547	0.81	2.43
MED6	210104_at	0.035133	0.872577	6.37834	1.14	35.75	0.494026	0.993177	1.337	0.58	3.07	0.0126653	0.737849	9.5976	1.62	56.8	0.363065	0.95302	1.4833	0.63	3.47
PIK3R4	212740_at	0.277215	0.87784	0.569635	0.21	1.57	0.2072	0.993177	0.665607	0.35	1.25	0.335141	0.769571	0.603052	0.22	1.69	0.108878	0.93455	0.590949	0.31	1.12
ATAD2	222740_at	0.494274	0.931675	1.39916	0.53	3.67	0.352837	0.993177	1.18581	0.83	1.7	0.656747	0.907558	1.2511	0.47	3.36	0.648969	0.95302	1.09349	0.74	1.61
CCDC85C	219018_s_at	0.4207	0.87784	1.36612	0.64	2.92	0.575319	0.993177	1.24946	0.57	2.72	0.181935	0.769571	1.76813	0.77	4.08	0.574084	0.95302	1.29301	0.53	3.17
CLDND1	1554149_at	0.706325	0.971765	1.2243	0.43	3.51	0.397694	0.993177	1.22776	0.76	1.98	0.959592	0.967318	1.02733	0.36	2.92	0.914015	0.986472	1.02797	0.62	1.7
SIVA1	210792_x_at	0.754135	0.971765	0.909552	0.5	1.65	0.866005	0.993177	1.04988	0.6	1.85	0.858353	0.931917	1.059	0.56	1.99	0.931038	0.986472	1.02849	0.54	1.94
MCM4	222037_at	0.826481	0.98174	0.841374	0.18	3.94	0.604045	0.993177	0.901845	0.61	1.33	0.749666	0.92872	1.28296	0.28	5.93	0.420571	0.95302	0.850545	0.57	1.26
INIP	223559_s_at	0.553302	0.940266	1.68123	0.3	9.37	0.954041	0.993177	1.02292	0.47	2.21	0.572124	0.865096	1.65318	0.29	9.46	0.868212	0.970039	0.934155	0.42	2.09
DNAJC21	238337_s_at	0.401121	0.87784	0.686984	0.29	1.65	0.625757	0.993177	0.876092	0.51	1.49	0.290427	0.769571	0.637243	0.28	1.47	0.369361	0.95302	0.781083	0.46	1.34
NFKBIB	214062_x_at	0.661613	0.966697	0.86093	0.44	1.68	0.58804	0.993177	0.774233	0.31	1.95	0.393088	0.769571	0.736356	0.36	1.49	0.534908	0.95302	0.751188	0.3	1.85
PPAT	209433_s_at	0.104626	0.872577	0.324585	0.08	1.26	0.952306	0.993177	0.990418	0.72	1.36	0.0747604	0.769571	0.281665	0.07	1.13	0.729193	0.95302	1.05792	0.77	1.46
TSEN54	1558304_s_at	0.360008	0.87784	0.515128	0.12	2.13	0.311565	0.993177	0.653816	0.29	1.49	0.410659	0.769571	0.560958	0.14	2.22	0.227067	0.93455	0.602904	0.27	1.37
NUP155	206550_s_at	0.422693	0.87784	0.697263	0.29	1.68	0.535739	0.993177	1.12958	0.77	1.66	0.295495	0.769571	0.637335	0.27	1.48	0.693113	0.95302	1.07761	0.74	1.56
SEC23A	212887_at	0.969539	0.993768	0.986117	0.48	2.02	0.445193	0.993177	1.22601	0.73	2.07	0.453655	0.769571	1.3123	0.64	2.67	0.24161	0.93455	1.38632	0.8	2.4
MRPL52	221997_s_at	0.941265	0.993768	1.03591	0.41	2.65	0.656276	0.993177	1.16467	0.6	2.28	0.347826	0.769571	1.58568	0.61	4.15	0.237813	0.93455	1.53946	0.75	3.15
NFE2L2	1567013_at	0.672608	0.967937	0.823122	0.33	2.03	0.129393	0.993177	0.787027	0.58	1.07	0.536123	0.839032	0.746329	0.3	1.89	0.0454636	0.93455	0.729723	0.54	0.99
PPFIA1	210236_at	0.571727	0.94069	1.06299	0.86	1.31	0.267032	0.993177	1.13646	0.91	1.42	0.319818	0.769571	1.1155	0.9	1.38	0.166327	0.93455	1.18783	0.93	1.52
CCDC127	226515_at	0.70861	0.971765	0.859336	0.39	1.9	0.980631	0.993177	0.991427	0.49	1.99	0.477123	0.77579	0.752169	0.34	1.65	0.983393	0.99285	1.00766	0.49	2.07
MAP7	202890_at	0.166516	0.872577	0.281757	0.05	1.7	0.815212	0.993177	0.951712	0.63	1.44	0.465546	0.769571	0.472133	0.06	3.54	0.794236	0.96542	0.939187	0.59	1.5
VDAC3	208844_at	0.979481	0.993768	1.00558	0.66	1.54	0.287465	0.993177	1.22246	0.84	1.77	0.520472	0.826944	1.15778	0.74	1.81	0.224845	0.93455	1.28415	0.86	1.92
NADKD1	228594_at	0.426164	0.87784	0.700031	0.29	1.68	0.112929	0.993177	0.664965	0.4	1.1	0.304432	0.769571	0.6443	0.28	1.49	0.0570179	0.93455	0.607126	0.36	1.02
C5orf51	226159_at	0.291793	0.87784	0.620311	0.26	1.51	0.962401	0.993177	0.986046	0.55	1.77	0.192001	0.769571	0.566859	0.24	1.33	0.48032	0.95302	0.796027	0.42	1.5
EXOSC3	223489_x_at	0.108234	0.872577	1.9408	0.86	4.36	0.29599	0.993177	1.32995	0.78	2.27	0.129723	0.769571	1.84684	0.84	4.08	0.390446	0.95302	1.2659	0.74	2.17
NDUFA13	220864_s_at	0.725479	0.971765	0.793474	0.22	2.89	0.94202	0.993177	0.97247	0.46	2.06	0.847491	0.931917	0.872897	0.22	3.49	0.952578	0.992431	1.02473	0.46	2.29
TMEM19	229126_at	0.00143973	0.180254	2.71715	1.47	5.02	0.402985	0.993177	1.19456	0.79	1.81	0.0119405	0.737849	2.28214	1.2	4.34	0.474438	0.95302	1.1656	0.77	1.77
SUPT16H	217815_at	0.810012	0.971765	0.909262	0.42	1.97	0.698803	0.993177	1.11518	0.64	1.94	0.627291	0.89174	1.20891	0.56	2.6	0.492793	0.95302	1.23837	0.67	2.28
PTK2	241453_at	0.331829	0.87784	1.54544	0.64	3.72	0.304834	0.993177	1.1595	0.87	1.54	0.166775	0.769571	1.97887	0.75	5.21	0.454934	0.95302	1.13158	0.82	1.56
CCNI	208655_at	0.126701	0.872577	0.335236	0.08	1.36	0.28021	0.993177	0.623834	0.26	1.47	0.0765672	0.769571	0.284084	0.07	1.14	0.399417	0.95302	0.69628	0.3	1.62
DCAF10	226511_at	0.108234	0.872577	1.9408	0.86	4.36	0.133402	0.993177	1.42273	0.9	2.25	0.129723	0.769571	1.84684	0.84	4.08	0.0685666	0.93455	1.55504	0.97	2.5
DYRK2	202971_s_at	0.128603	0.872577	1.43213	0.9	2.28	0.134069	0.993177	1.40969	0.9	2.21	0.213401	0.769571	1.3267	0.85	2.07	0.359831	0.95302	1.24516	0.78	1.99
SUB1	224586_x_at	0.263058	0.87784	0.602673	0.25	1.46	0.219944	0.993177	0.514989	0.18	1.49	0.179761	0.769571	0.561096	0.24	1.31	0.146944	0.93455	0.466574	0.17	1.31
GEMIN7	222821_s_at	0.721518	0.971765	0.844823	0.33	2.14	0.916075	0.993177	1.04112	0.49	2.2	0.564523	0.857747	0.71613	0.23	2.23	0.859241	0.970039	1.07265	0.49	2.33
EXOSC3	227912_s_at	0.108234	0.872577	1.9408	0.86	4.36	0.18909	0.993177	1.38034	0.85	2.23	0.129723	0.769571	1.84684	0.84	4.08	0.14629	0.93455	1.43963	0.88	2.35
EML2	204398_s_at	0.927382	0.993768	1.03832	0.46	2.33	0.834719	0.993177	0.954121	0.61	1.48	0.94884	0.964382	0.968872	0.37	2.55	0.734131	0.95302	0.916769	0.56	1.51
ZBTB43	204182_s_at	0.865289	0.993768	1.15678	0.22	6.22	0.207728	0.993177	1.55572	0.78	3.09	0.843064	0.931917	1.18633	0.22	6.44	0.236589	0.93455	1.51566	0.76	3.02
MEGF8	214778_at	0.872706	0.993768	0.917906	0.32	2.62	0.653784	0.993177	1.10343	0.72	1.7	0.663424	0.909794	0.776555	0.25	2.43	0.717131	0.95302	1.09624	0.67	1.8
PSMD4	210460_s_at	0.758551	0.971765	0.800207	0.19	3.31	0.966184	0.993177	1.01407	0.53	1.93	0.685325	0.92872	0.740536	0.17	3.17	0.932425	0.986472	0.971608	0.5	1.89
THOC1	204064_at	0.182622	0.872577	0.518705	0.2	1.36	0.358231	0.993177	0.781961	0.46	1.32	0.453255	0.769571	0.670639	0.24	1.91	0.438867	0.95302	0.802092	0.46	1.4
PAK1IP1	218886_at	0.220214	0.872577	0.341181	0.06	1.9	0.316315	0.993177	0.791603	0.5	1.25	0.2	0.769571	0.332714	0.06	1.79	0.250569	0.93455	0.759182	0.47	1.21
DCAF7	221744_at	0.484475	0.921828	0.530687	0.09	3.14	0.591217	0.993177	0.812681	0.38	1.73	0.4294	0.769571	0.505951	0.09	2.74	0.619203	0.95302	0.825362	0.39	1.76
ATP13A1	218052_s_at	0.725479	0.971765	0.793474	0.22	2.89	0.601623	0.993177	1.16902	0.65	2.1	0.847491	0.931917	0.872897	0.22	3.49	0.170735	0.93455	1.54234	0.83	2.87
WDPCP	224180_x_at	0.484446	0.921828	1.62317	0.42	6.31	0.459834	0.993177	1.21788	0.72	2.05	0.855758	0.931917	1.13087	0.3	4.26	0.572857	0.95302	1.15227	0.7	1.89
ZNF410	202010_s_at	0.0179436	0.872577	7.63076	1.42	41.06	0.113953	0.993177	2.31483	0.82	6.55	0.00583888	0.737849	11.5701	2.03	65.97	0.241678	0.93455	1.90745	0.65	5.62
PEX3	203972_s_at	0.0931561	0.872577	0.183516	0.03	1.33	0.830441	0.993177	0.947699	0.58	1.55	0.246525	0.769571	0.279387	0.03	2.41	0.761198	0.95302	1.08793	0.63	1.87
STAU1	213037_x_at	0.584059	0.94069	1.43438	0.39	5.22	0.365016	0.993177	0.694022	0.31	1.53	0.80521	0.92872	1.18203	0.31	4.47	0.102579	0.93455	0.490023	0.21	1.15
FN3KRP	218210_at	0.575064	0.94069	0.671013	0.17	2.71	0.884632	0.993177	0.956354	0.52	1.75	0.599891	0.875242	0.686701	0.17	2.8	0.792621	0.96542	0.918593	0.49	1.73
DCAF10	219001_s_at	0.108234	0.872577	1.9408	0.86	4.36	0.0790326	0.993177	1.52003	0.95	2.43	0.129723	0.769571	1.84684	0.84	4.08	0.015964	0.93455	1.80928	1.12	2.93
CNOT2	233054_at	0.65907	0.966697	0.888369	0.53	1.5	0.243877	0.993177	1.3059	0.83	2.05	0.798831	0.92872	0.932611	0.55	1.59	0.257224	0.93455	1.29307	0.83	2.02
GINS4	211767_at	0.620877	0.966697	1.22881	0.54	2.78	0.273166	0.993177	1.2331	0.85	1.79	0.201831	0.769571	1.75085	0.74	4.14	0.0365398	0.93455	1.58832	1.03	2.45
NSFL1C	220248_x_at	0.592115	0.945571	0.753625	0.27	2.12	0.71948	0.993177	1.1136	0.62	2	0.481064	0.778155	0.679135	0.23	1.99	0.976963	0.99285	1.0095	0.53	1.92
APTX	222658_s_at	0.271933	0.87784	1.61189	0.69	3.78	0.731554	0.993177	1.09606	0.65	1.85	0.226972	0.769571	1.66812	0.73	3.83	0.526072	0.95302	1.20063	0.68	2.11
SHB	204656_at	0.189267	0.872577	1.68663	0.77	3.68	0.0185984	0.993177	1.72279	1.1	2.71	0.15062	0.769571	1.75453	0.82	3.78	0.0263822	0.93455	1.64841	1.06	2.56
FASTKD3	219200_at	0.241605	0.87784	0.5906	0.24	1.43	0.443631	0.993177	0.820275	0.49	1.36	0.123261	0.769571	0.498669	0.21	1.21	0.290034	0.937816	0.764961	0.47	1.26
NEK9	212299_at	0.0340914	0.872577	6.24527	1.15	33.99	0.153268	0.993177	1.67683	0.82	3.41	0.0130671	0.737849	9.26557	1.6	53.75	0.141713	0.93455	1.6678	0.84	3.3
ZNF45	207304_at	0.500069	0.931675	0.721235	0.28	1.86	0.969762	0.993177	1.0103	0.59	1.72	0.40497	0.769571	0.63728	0.22	1.84	0.98054	0.99285	1.00689	0.58	1.75
HERC2	217902_s_at	0.98635	0.995567	0.990572	0.33	2.93	0.63426	0.993177	1.13291	0.68	1.89	0.79437	0.92872	1.17092	0.36	3.84	0.683777	0.95302	1.12342	0.64	1.97
BPTF	209271_at	0.65332	0.966697	0.676309	0.12	3.73	0.316387	0.993177	0.628478	0.25	1.56	0.537618	0.839275	0.597278	0.12	3.08	0.264469	0.93455	0.599038	0.24	1.47
DDX42	201788_at	0.484475	0.921828	0.530687	0.09	3.14	0.880096	0.993177	0.941174	0.43	2.07	0.4294	0.769571	0.505951	0.09	2.74	0.528162	0.95302	0.776618	0.35	1.7
PTRH2	218732_at	0.112309	0.872577	0.220053	0.03	1.43	0.46049	0.993177	0.782054	0.41	1.5	0.121485	0.769571	0.237048	0.04	1.47	0.403088	0.95302	0.759414	0.4	1.45
SUB1	221727_at	0.263058	0.87784	0.602673	0.25	1.46	0.387926	0.993177	0.852421	0.59	1.22	0.179761	0.769571	0.561096	0.24	1.31	0.137754	0.93455	0.757184	0.52	1.09
NIPAL1	232158_x_at	0.920747	0.993768	1.03983	0.48	2.24	0.362185	0.993177	1.20161	0.81	1.78	0.925219	0.959363	1.04134	0.45	2.43	0.408606	0.95302	1.19089	0.79	1.8
RB1CC1	202034_x_at	0.451666	0.90477	1.79073	0.39	8.16	0.661323	0.993177	0.882579	0.5	1.54	0.245422	0.769571	2.4868	0.53	11.57	0.480478	0.95302	0.811518	0.45	1.45
RCHY1	214281_s_at	0.159873	0.872577	0.356307	0.08	1.5	0.31489	0.993177	0.774458	0.47	1.27	0.109789	0.769571	0.312104	0.07	1.3	0.236417	0.93455	0.734034	0.44	1.22
ANKRD40	227064_at	0.902287	0.993768	1.08692	0.29	4.11	0.607788	0.993177	1.25944	0.52	3.04	0.903133	0.947004	0.919795	0.24	3.54	0.650221	0.95302	1.21647	0.52	2.84
CTTN	214074_s_at	0.732492	0.971765	1.0477	0.8	1.37	0.230472	0.993177	1.17944	0.9	1.54	0.452268	0.769571	1.11058	0.84	1.46	0.1755	0.93455	1.21235	0.92	1.6
HEBP2	203430_at	0.144766	0.872577	0.231001	0.03	1.66	0.0360145	0.993177	0.485442	0.25	0.95	0.381782	0.769571	0.39101	0.05	3.21	0.0872239	0.93455	0.55518	0.28	1.09
ZNF148	203318_s_at	0.836178	0.985893	1.1059	0.43	2.87	0.227282	0.993177	1.36001	0.83	2.24	0.979096	0.982234	1.01295	0.39	2.65	0.535906	0.95302	1.18367	0.69	2.02
CCDC61	228472_at	0.290237	0.87784	0.510318	0.15	1.78	0.795973	0.993177	1.08613	0.58	2.03	0.207323	0.769571	0.378283	0.08	1.71	0.752707	0.95302	1.11875	0.56	2.25
ZCCHC17	223108_s_at	0.038962	0.872577	0.153416	0.03	0.91	0.0765745	0.993177	0.485922	0.22	1.08	0.036266	0.769571	0.116571	0.02	0.87	0.176916	0.93455	0.554385	0.24	1.31
MRE11A	205395_s_at	0.690972	0.971765	1.41161	0.26	7.72	0.55909	0.993177	1.1699	0.69	1.98	0.92291	0.959363	0.91673	0.16	5.33	0.877064	0.970039	0.956006	0.54	1.69
MRPS30	222275_at	0.18078	0.872577	0.55218	0.23	1.32	0.885978	0.993177	1.03022	0.69	1.55	0.117792	0.769571	0.50962	0.22	1.19	0.6251	0.95302	0.901549	0.59	1.37
FBXL12	220127_s_at	0.806823	0.971765	0.824138	0.17	3.88	0.87042	0.993177	1.07272	0.46	2.49	0.910068	0.951089	1.09662	0.22	5.43	0.779538	0.961703	1.13975	0.46	2.85
PPAPDC1B	226150_at	0.41019	0.87784	0.85572	0.59	1.24	0.331372	0.993177	0.872445	0.66	1.15	0.754985	0.92872	0.940778	0.64	1.38	0.493065	0.95302	0.902446	0.67	1.21
RARS2	225264_at	0.667114	0.966697	0.587007	0.05	6.65	0.73598	0.993177	0.866702	0.38	1.99	0.844005	0.931917	1.28092	0.11	15.08	0.843629	0.969198	0.918129	0.39	2.15
TSEN54	225879_at	0.360008	0.87784	0.515128	0.12	2.13	0.362581	0.993177	0.724937	0.36	1.45	0.410659	0.769571	0.560958	0.14	2.22	0.456983	0.95302	0.772025	0.39	1.53
COG1	227784_s_at	0.41246	0.87784	0.545738	0.13	2.32	0.980003	0.993177	0.989793	0.44	2.21	0.466174	0.769571	0.585846	0.14	2.47	0.97837	0.99285	1.01102	0.46	2.23
STAU1	207320_x_at	0.584059	0.94069	1.43438	0.39	5.22	0.283503	0.993177	0.661127	0.31	1.41	0.80521	0.92872	1.18203	0.31	4.47	0.0979502	0.93455	0.49743	0.22	1.14
NXT1	218708_at	0.936578	0.993768	1.04092	0.39	2.8	0.930443	0.993177	0.972484	0.52	1.82	0.79167	0.92872	0.868324	0.3	2.48	0.422694	0.95302	0.755675	0.38	1.5
CRK	202225_at	0.889062	0.993768	0.928302	0.33	2.64	0.637452	0.993177	0.869663	0.49	1.55	0.709533	0.92872	0.812529	0.27	2.42	0.461687	0.95302	0.789279	0.42	1.48
ZNF230	1557322_at	0.736389	0.971765	0.852042	0.34	2.16	0.480762	0.993177	1.22105	0.7	2.13	0.708311	0.92872	0.81822	0.29	2.34	0.559926	0.95302	1.21536	0.63	2.34
ZC3H15	201595_s_at	0.718513	0.971765	0.734823	0.14	3.92	0.457304	0.993177	0.748262	0.35	1.61	0.794854	0.92872	0.79774	0.15	4.38	0.339573	0.95302	0.671345	0.3	1.52
MAU2	212505_s_at	0.767441	0.971765	0.822746	0.23	3	0.914641	0.993177	0.957186	0.43	2.13	0.929211	0.959363	0.939322	0.24	3.74	0.819428	0.969198	0.90509	0.38	2.13
CHMP5	218085_at	0.348851	0.87784	1.39503	0.7	2.8	0.723057	0.993177	1.0929	0.67	1.79	0.365091	0.769571	1.36309	0.7	2.66	0.649803	0.95302	1.13727	0.65	1.98
ATP5SL	45828_at	0.812513	0.971765	1.09742	0.51	2.37	0.258207	0.993177	1.43237	0.77	2.67	0.929705	0.959363	0.964353	0.43	2.16	0.378723	0.95302	1.32714	0.71	2.49
TUBGCP6	225758_s_at	0.338085	0.87784	1.99925	0.48	8.25	0.938864	0.993177	0.974389	0.5	1.89	0.151075	0.769571	2.7423	0.69	10.87	0.587311	0.95302	0.832408	0.43	1.61
PAPOLA	222035_s_at	0.549784	0.940266	1.26975	0.58	2.78	0.183307	0.993177	1.35467	0.87	2.12	0.277424	0.769571	1.60723	0.68	3.78	0.148846	0.93455	1.42424	0.88	2.3
ZNF24	203247_s_at	0.462222	0.90477	0.699749	0.27	1.81	0.701385	0.993177	0.879309	0.46	1.7	0.695579	0.92872	0.815248	0.29	2.27	0.875405	0.970039	0.94391	0.46	1.94
NSFL1C	232520_s_at	0.592115	0.945571	0.753625	0.27	2.12	0.521851	0.993177	1.22604	0.66	2.29	0.481064	0.778155	0.679135	0.23	1.99	0.693025	0.95302	1.1481	0.58	2.28
ABI2	209856_x_at	0.778591	0.971765	0.87644	0.35	2.2	0.725721	0.993177	1.12259	0.59	2.14	0.80601	0.92872	0.882238	0.32	2.4	0.499478	0.95302	1.27169	0.63	2.55
LOC100508120	233063_s_at	0.931365	0.993768	0.955015	0.34	2.72	0.424024	0.993177	0.777028	0.42	1.44	0.930982	0.959363	0.951895	0.31	2.9	0.269111	0.93455	0.683158	0.35	1.34
C17orf85	222779_s_at	0.830335	0.98445	0.889954	0.31	2.59	0.905827	0.993177	0.959459	0.48	1.9	0.640941	0.904203	0.766925	0.25	2.34	0.486725	0.95302	0.74865	0.33	1.69
ZNF565	228305_at	0.435172	0.887353	0.651685	0.22	1.91	0.586807	0.993177	0.871889	0.53	1.43	0.354847	0.769571	0.596791	0.2	1.78	0.592924	0.95302	0.875765	0.54	1.42
LONP2	229663_at	0.0472656	0.872577	2.87652	1.01	8.17	0.0606699	0.993177	1.67959	0.98	2.89	0.0634384	0.769571	2.69877	0.95	7.7	0.119257	0.93455	1.54146	0.89	2.66
LINC00493	226236_at	0.844151	0.985893	0.903451	0.33	2.49	0.497042	0.993177	0.824526	0.47	1.44	0.532399	0.837391	0.709492	0.24	2.08	0.249125	0.93455	0.703729	0.39	1.28
PPP2R5C	1554364_at	0.550053	0.940266	1.27254	0.58	2.8	0.410509	0.993177	1.20398	0.77	1.87	0.324245	0.769571	1.55262	0.65	3.72	0.259821	0.93455	1.31138	0.82	2.1
IFT43	226195_at	0.0609766	0.872577	3.58207	0.94	13.61	0.0170023	0.993177	2.65776	1.19	5.93	0.0348906	0.769571	4.83767	1.12	20.93	0.0147592	0.93455	2.82565	1.23	6.51
C5orf22	1565939_at	0.290207	0.87784	0.622239	0.26	1.5	0.530107	0.993177	1.25574	0.62	2.56	0.202853	0.769571	0.581072	0.25	1.34	0.526257	0.95302	1.25333	0.62	2.52
DAP	201095_at	0.453412	0.90477	0.717293	0.3	1.71	0.441329	0.993177	0.815895	0.49	1.37	0.278141	0.769571	0.62177	0.26	1.47	0.441661	0.95302	0.80607	0.47	1.4
MTPAP	233873_x_at	0.977157	0.993768	0.97985	0.24	3.95	0.754825	0.993177	1.08379	0.65	1.8	0.842223	0.931917	1.16291	0.26	5.14	0.713844	0.95302	1.10843	0.64	1.92
ZNF696	220967_s_at	0.203249	0.872577	1.79179	0.73	4.4	0.681844	0.993177	1.12175	0.65	1.94	0.0989801	0.769571	2.28533	0.86	6.1	0.687671	0.95302	1.12241	0.64	1.97
UBE2V2	230411_at	0.826481	0.98174	0.841374	0.18	3.94	0.461942	0.993177	1.25321	0.69	2.29	0.749666	0.92872	1.28296	0.28	5.93	0.370337	0.95302	1.32561	0.72	2.46
BTBD1	217945_at	0.936333	0.993768	0.947306	0.25	3.58	0.517834	0.993177	1.24723	0.64	2.44	0.946352	0.964382	1.04779	0.27	4.08	0.399568	0.95302	1.35664	0.67	2.76
HKR1	231836_at	0.699468	0.971765	0.820475	0.3	2.24	0.946556	0.993177	1.01522	0.65	1.58	0.447158	0.769571	0.663517	0.23	1.91	0.692674	0.95302	0.913599	0.58	1.43
ATP6V1D	208898_at	0.0656896	0.872577	4.74946	0.9	24.96	0.191094	0.993177	1.70341	0.77	3.79	0.0258787	0.769571	6.81082	1.26	36.83	0.341758	0.95302	1.45768	0.67	3.17
DDX49	31807_at	0.772455	0.971765	0.827812	0.23	2.98	0.782305	0.993177	0.926508	0.54	1.59	0.876251	0.941639	0.896819	0.23	3.53	0.849984	0.969198	0.945972	0.53	1.68
C11orf73	230326_s_at	0.566346	0.94069	1.72421	0.27	11.1	0.890404	0.993177	0.940947	0.4	2.24	0.931778	0.959363	1.08836	0.16	7.56	0.58701	0.95302	0.775284	0.31	1.94
ZCCHC17	223107_s_at	0.038962	0.872577	0.153416	0.03	0.91	0.0556406	0.993177	0.457673	0.21	1.02	0.036266	0.769571	0.116571	0.02	0.87	0.120703	0.93455	0.510554	0.22	1.19
RAB12	236019_at	0.132647	0.872577	0.446166	0.16	1.28	0.614252	0.993177	0.880607	0.54	1.44	0.284764	0.769571	0.524713	0.16	1.71	0.626942	0.95302	0.874782	0.51	1.5
NDUFS1	229647_at	0.894942	0.993768	1.04073	0.58	1.88	0.768281	0.993177	1.06607	0.7	1.63	0.714793	0.92872	1.12019	0.61	2.06	0.837576	0.969198	1.04632	0.68	1.61
