# Supplementary material for: Integrative analysis of genome-wide gene copy number changes and gene expression in non-small cell lung cancer
Source: PLoS One. 2017 Nov 7;12(11):e0187246. doi: 10.1371/journal.pone.0187246 (PMC5675410; doi:10.1371/journal.pone.0187246)
Supplement: S9 Table — (A) CNV and gene expression data from 520 adenocarcinoma and 504 squamous cancer cases provided by the TCGA were retrieved from cBioPortal (http://www.cbioportal.org, Gao et al. Sci. Signal. 2013 & Cerami et al. Cancer Discov. 2012). (B) CNV and gene expression data from 520 adenocarcinoma cases provided by the TCGA were retrieved from cBioPortal (http://www.cbioportal.org, Gao et al. Sci. Signal. 2013 & Cerami et al. Cancer Discov. 2012). (C) CNV and gene expression data from 504 squamous cell cancer cases provided by the TCGA were retrieved from cBioPortal (http://www.cbioportal.org, Gao et al. Sci. Signal. 2013 & Cerami et al. Cancer Discov. 2012). (XLSX) [file pone.0187246.s013.xlsx]

## Sheet: S9A TCGA cBioportal AC and SCC
Suppl Table 9a: Analysis of highly correlating genes in an independent data set. CNV and gene expression data from 520 adenocarcinoma and 504 squamous cancer cases provided by the TCGA were retrieved from cBioPortal (http://www.cbioportal.org, Gao et al. Sci. Signal. 2013 & Cerami et al. Cancer Discov. 2012). The data for gene expression and gene copy numbers (putative categorized using GISTIC 2.…
Gene symbol	Spearman rho	p-value
ASH2L	0.814791	6.9062e-241		7% with rho > 0.7
ZNF639	0.803815	1.3142e-229		29% with rho > 0.6
FXR1	0.801486	2.6317e-227		63% with rho > 0.5
MFN1	0.799276	3.7745e-225
DCUN1D1	0.794537	1.2877e-220
ATP11B	0.774661	7.8354e-203
KPNA4	0.763504	1.2539e-193
DHX36	0.749084	1.8375e-182
GMPS	0.746574	1.3493e-180
LSM1	0.741845	3.8563e-177
TBL1XR1	0.739361	2.3512e-175
RSRC1	0.737436	5.504e-174
WHSC1L1	0.734956	3.0704e-172
WDR20	0.730449	4.0833e-169
B3GNT5	0.721225	6.485e-163
DNAJC19	0.719612	7.4204e-162
SRP54	0.716879	4.4327e-160
PROSC	0.716182	1.2489e-159
ZNF24	0.705417	7.4877e-153
SIAH2	0.705101	1.1716e-152
UBE2R2	0.704512	2.6946e-152
ERLIN2	0.697837	2.9188e-148
ABCC5	0.697625	3.9051e-148
MRPS22	0.695391	8.2413e-147
BRF2	0.695123	1.1847e-146
PDCD10	0.693201	1.593e-145
TM2D2	0.691536	1.4882e-144
TFDP2	0.689641	1.8585e-143
C3ORF17	0.685674	3.4454e-141
TRAPPC6B	0.684555	1.4807e-140
UMPS	0.682967	1.1594e-139
SCFD1	0.68217	3.2387e-139
CDC37L1	0.676879	2.7409e-136
FBXO25	0.675855	9.9417e-136
COPB2	0.675541	1.4739e-135
PIK3R4	0.675324	1.9344e-135
STRN3	0.675086	2.606e-135
DDHD2	0.673275	2.4956e-134
NGDN	0.672712	5.0232e-134
AP4S1	0.67203	1.1687e-133
ATR	0.66956	2.4421e-132
TRAPPC8	0.666036	1.7763e-130
C18ORF8	0.664549	1.0651e-129
GOLGA7	0.661435	4.3894e-128
BRMS1L	0.653559	4.3731e-124
VCP	0.651325	5.6683e-123
KIAA0391	0.650398	1.6304e-122
SS18	0.649191	6.4196e-122
ASTE1	0.646615	1.1706e-120
LONP2	0.644398	1.3926e-119
TIMMDC1	0.642049	1.8778e-118
RNF7	0.63862	8.0429e-117
PHC3	0.633996	1.1827e-114
VDAC3	0.633357	2.3398e-114
CLTA	0.631802	1.2258e-113
BAG4	0.629983	8.394e-113
GPATCH1	0.629276	1.7672e-112
PPFIA1	0.628526	3.887e-112
PAF1	0.62487	1.7534e-110
SLC25A36	0.624081	3.9609e-110
POLR2B	0.622147	2.8959e-109
STAU1	0.620299	1.9116e-108
POP4	0.618494	1.1936e-107
EXOC1	0.617918	2.1359e-107
GRHPR	0.61769	2.6867e-107
SF3A3	0.617089	4.9242e-107
INTS4	0.616433	9.5187e-107
ERICH1	0.616396	9.8813e-107
PIGO	0.614771	5.0234e-106
FKBP3	0.612693	3.9638e-105
ZBTB5	0.612494	4.8261e-105
ARHGAP5	0.610705	2.8187e-104
TBP	0.610563	3.243e-104
C14ORF166	0.609591	8.4138e-104
ANKRD27	0.609441	9.7431e-104
EAPP	0.60832	2.9127e-103
RNF38	0.607684	5.4132e-103
SNIP1	0.60734	7.5605e-103
KAT6A	0.607149	9.1023e-103
NUBPL	0.60703	1.0217e-102
VPS72	0.606824	1.2478e-102
PCMT1	0.606184	2.3193e-102
MEAF6	0.605756	3.5077e-102
PRMT5	0.60349	3.1066e-101
POLB	0.602718	6.4993e-101
GZF1	0.601076	3.1106e-100
PRUNE	0.599542	1.3304e-99
CMAS	0.59919	1.8557e-99
ACTR10	0.598929	2.3724e-99
PSMD8	0.598673	3.0202e-99
SETDB1	0.597514	8.9882e-99
WRNIP1	0.594438	1.5857e-97
LRRC58	0.593262	4.71396e-97
NFYC	0.592888	6.66256e-97
BTBD6	0.592652	8.27904e-97
SNX6	0.59207	1.41628e-96
USP14	0.591652	2.08052e-96
PLD1	0.590948	3.97118e-96
GEMIN2	0.588352	4.24427e-95
TXLNA	0.587837	6.7756e-95
STOML2	0.584616	1.23798e-93
BAZ1A	0.582794	6.31352e-93
AP3M2	0.581954	1.33382e-92
RNMT	0.581172	2.6693e-92
AK3	0.581079	2.89997e-92
G2E3	0.580711	4.01597e-92
CREB3	0.578656	2.45824e-91
DCTN3	0.578209	3.64009e-91
FNTA	0.577846	5.00259e-91
TRMT10C	0.5776	6.20519e-91
MRPS35	0.577536	6.56566e-91
RIC1	0.576556	1.5462e-90
CNOT2	0.576012	2.48319e-90
USP47	0.575492	3.90342e-90
SMIM19	0.574898	6.53989e-90
MCCC1	0.574826	6.95709e-90
EIF3K	0.574783	7.22209e-90
PLPP6	0.573813	1.67242e-89
DDX27	0.573154	2.95358e-89
EID2	0.572734	4.24118e-89
PPIE	0.571973	8.1598e-89
UBE2V2	0.571057	1.78915e-88
AASDHPPT	0.570845	2.14539e-88
TIMM50	0.570738	2.35127e-88
KRAS	0.569245	8.39414e-88
TESK1	0.568822	1.20307e-87
IFT74	0.568035	2.34624e-87
PSMG2	0.567412	3.97419e-87
ASUN	0.566914	6.04857e-87
YTHDF3	0.566431	9.09211e-87
PSMB1	0.564963	3.12226e-86
RBFA	0.56418	6.01138e-86
UQCRFS1	0.56356	1.00908e-85
TMEM68	0.559686	2.50271e-84
DCAF13	0.559189	3.76465e-84
GNL2	0.557745	1.22969e-83
PACS2	0.557316	1.74703e-83
MRPL9	0.557101	2.08132e-83
RALGAPA1	0.555137	1.02856e-82
FANCG	0.554838	1.31024e-82
CFAP20	0.553416	4.13466e-82
MIPOL1	0.551382	2.117e-81
HECTD1	0.548627	1.90117e-80
NUP107	0.548408	2.26047e-80
MAU2	0.548221	2.62266e-80
EXO5	0.547371	5.13441e-80
C1ORF50	0.546871	7.61689e-80
COPS5	0.545193	2.84894e-79
NOA1	0.544067	6.87775e-79
SIGMAR1	0.542569	2.20834e-78
DLAT	0.540906	8.01137e-78
FBXO33	0.538801	4.04739e-77
SIAH1	0.538376	5.60975e-77
CWC15	0.538162	6.60879e-77
UTP23	0.537172	1.40806e-76
UTP11L	0.536689	2.03506e-76
PLGRKT	0.536297	2.74088e-76
FOXJ3	0.53623	2.88626e-76
KBTBD2	0.534983	7.4323e-76
UBAP2	0.534731	8.99703e-76
PARK7	0.53285	3.71644e-75
SRP72	0.53105	1.4328e-74
MRPL18	0.530989	1.50012e-74
ECH1	0.530932	1.56556e-74
CLDND1	0.529602	4.22034e-74
FADD	0.528392	1.03561e-73
MRPS17	0.527728	1.69275e-73
TBK1	0.527716	1.70768e-73
CCT2	0.5276	1.86074e-73
SEC61G	0.527285	2.34834e-73
FGFR1OP2	0.526366	4.62394e-73
HINT2	0.526188	5.26946e-73
MTFR1	0.525528	8.55681e-73
ALG8	0.523852	2.91631e-72
C8ORF33	0.522936	5.68666e-72
MTA1	0.519227	8.3049e-71
EED	0.516046	8.06468e-70
STK3	0.515351	1.32119e-69
BRF1	0.514217	2.94807e-69
ARMC1	0.512009	1.39498e-68
GOLT1B	0.511655	1.78775e-68
CSNK2A2	0.511145	2.55423e-68
PPP2R3C	0.510613	3.70649e-68
VCPIP1	0.510328	4.52186e-68
C1ORF109	0.506131	8.277e-67
RB1CC1	0.505167	1.60384e-66
C8ORF76	0.504297	2.91072e-66
NOL9	0.500386	4.14588e-65
CDCA4	0.499947	5.57491e-65
GALT	0.49974	6.40821e-65
PRPF4B	0.499592	7.07845e-65
CCDC91	0.498301	1.68503e-64
RGP1	0.497048	3.89656e-64
MRPL15	0.496563	5.38342e-64
ZNF319	0.49605	7.57611e-64
EIF4EBP1	0.495072	1.4502e-63
KLHL42	0.494366	2.31416e-63
UBE2M	0.494352	2.33625e-63
USB1	0.494139	2.68998e-63
N4BP1	0.493991	2.96665e-63
LETM2	0.493144	5.18724e-63
RPP25L	0.491266	1.78031e-62
SEC23A	0.490462	3.01183e-62
ALS2	0.487076	2.71551e-61
PAPOLG	0.486744	3.36374e-61
NDUFS1	0.485367	8.15759e-61
PHF3	0.483885	2.10837e-60
MRPS12	0.483656	2.44015e-60
DTNBP1	0.483467	2.75308e-60
CAND1	0.481941	7.27346e-60
RAB3IP	0.479462	3.4852e-59
FAM96B	0.479378	3.67436e-59
CLOCK	0.478984	4.70902e-59
FAM177A1	0.477812	9.82063e-59
C2CD5	0.477344	1.31619e-58
TMEM126B	0.476009	3.02692e-58
LEMD3	0.475846	3.35177e-58
GMFB	0.474784	6.47952e-58
YEATS4	0.474705	6.80644e-58
FASTKD2	0.472418	2.79344e-57
ZC3H15	0.472014	3.58147e-57
PNO1	0.47141	5.18621e-57
ZMPSTE24	0.471119	6.20146e-57
CNOT1	0.469844	1.35127e-56
DCTN2	0.469801	1.387e-56
ATP1B3	0.469464	1.70342e-56
TMEM126A	0.466178	1.24716e-55
CYCS	0.465208	2.23536e-55
SLC25A21	0.463535	6.08691e-55
ORC2	0.462824	9.30481e-55
METTL1	0.461503	2.04094e-54
UBXN2B	0.46117	2.48601e-54
RRS1	0.461	2.7493e-54
CFL2	0.459169	8.10408e-54
PYROXD1	0.454719	1.09142e-52
C2ORF47	0.454635	1.14627e-52
MDM2	0.454087	1.57387e-52
GBAS	0.453726	1.94029e-52
LINC00667	0.453434	2.29657e-52
MED21	0.452696	3.51499e-52
NDUFB9	0.451894	5.57753e-52
NXT1	0.451868	5.65858e-52
TYW5	0.450793	1.04858e-51
NSMCE2	0.450481	1.25339e-51
SUMO1	0.449914	1.73298e-51
NUDT14	0.44637	1.29487e-50
CCT4	0.444784	3.16038e-50
RAB21	0.442659	1.03718e-49
ZNF691	0.441185	2.35269e-49
TPCN2	0.438543	1.01155e-48
TWF1	0.435651	4.91927e-48
C12ORF66	0.435335	5.84123e-48
LANCL2	0.434916	7.33608e-48
LPAR2	0.434877	7.49271e-48
ETNK1	0.434605	8.68339e-48
NIF3L1	0.431296	5.1732e-47
RP9P	0.42568	1.0226e-45
MDM1	0.425303	1.24726e-45
EGFR	0.422103	6.64723e-45
TBC1D15	0.421126	1.10384e-44
HEATR5A	0.42078	1.3208e-44
NDUFA13	0.416441	1.22802e-43
NDUFS5	0.413407	5.73003e-43
NAPB	0.412076	1.12059e-42
C14ORF80	0.408818	5.71213e-42
WDR12	0.405613	2.78614e-41
ATP5L	0.403845	6.62969e-41
FAM98C	0.403291	8.69338e-41
SLC35E3	0.401967	1.6559e-40
MBIP	0.399771	4.79268e-40
R3HDM2	0.39936	5.84024e-40
TRIT1	0.395815	3.18637e-39
FRS2	0.395144	4.38116e-39
C2ORF69	0.393129	1.13603e-38
TM7SF3	0.392354	1.63604e-38
VOPP1	0.389777	5.46308e-38
RAP1B	0.377972	1.1952e-35
C1D	0.377071	1.78671e-35
CCDC90B	0.372883	1.13973e-34
CHD7	0.360351	2.48478e-32
TMEM237	0.360322	2.51519e-32
AGPS	0.353396	4.45478e-31
CPSF6	0.340841	6.81578e-29
PPFIBP1	0.329315	5.66002e-27
BMPR2	0.326153	1.84156e-26
COMMD1	0.32098	1.2315e-25
PNN	0.315775	8.031e-25
ZNF697	0.31548	8.92036e-25
LYRM5	0.312441	2.61744e-24
FOXA1	0.308789	9.3858e-24
DYRK2	0.304677	3.87032e-23
PPP4R2	0.284657	2.78623e-20
FAM117B	0.260741	3.69071e-17
DNALI1	0.213325	7.37517e-12
ZNF713	0.189983	1.15923e-09
CST3	0.183941	3.88951e-09
NOD2	0.120767	0.000119389

## Sheet: S9B TCGA cBioportal AC
Suppl Table 9B: Analysis of highly correlating genes from adenocarcinomas in an independent data set. CNV and gene expression data from 520 adenocarcinoma cases provided by the TCGA were retrieved from cBioPortal (http://www.cbioportal.org, Gao et al. Sci. Signal. 2013 & Cerami et al. Cancer Discov. 2012). The data for gene expression and gene copy numbers (putative categorised using GISTIC 2.0) …
Gene symbol	Spearman rho	p-value		1% with rho > 0.7
PUF60	0.714157	4.88323e-81		14% with rho > 0.6
SRP54	0.708941	2.27597e-79		55% with rho > 0.5
FBXO25	0.680113	8.91112e-71
VDAC3	0.6678	2.11745e-67
TRAPPC6B	0.665641	7.96398e-67
BRMS1L	0.665282	9.91925e-67
YTHDF1	0.66275	4.61436e-66
RUFY1	0.661851	7.93497e-66
GOLGA7	0.64542	1.16052e-61
SS18	0.644922	1.53762e-61
CNOT2	0.642167	7.22612e-61
ENY2	0.641214	1.23e-60
SLU7	0.635638	2.65871e-59
STRN3	0.634459	5.04969e-59
SCFD1	0.632974	1.12878e-58
TERF1	0.63297	1.13176e-58
KIAA0391	0.623627	1.61621e-56
STAU1	0.623616	1.62547e-56
C19ORF12	0.621122	5.94084e-56
RAB2A	0.621094	6.02641e-56
YARS2	0.619155	1.63732e-55
DYRK1A	0.618979	1.79241e-55
GZF1	0.618861	1.90389e-55
BAZ1A	0.617207	4.43725e-55
DCAF13	0.616038	8.04491e-55
NFRKB	0.614557	1.70367e-54
CMAS	0.613878	2.40033e-54
TMEM68	0.612465	4.88401e-54
SETDB1	0.612266	5.39597e-54
C18ORF8	0.608961	2.79973e-53
KIAA1429	0.60773	5.14332e-53
SPIDR	0.606984	7.42934e-53
TRAPPC8	0.606655	8.73066e-53
INTS4	0.603242	4.62151e-52
COPS5	0.60221	7.6185e-52
FAM91A1	0.601955	8.62019e-52
POP4	0.599391	2.95746e-51
TCEB1	0.598295	4.99441e-51
MRPS35	0.597033	9.10328e-51
RALGAPA1	0.59703	9.1142e-51
RNF214	0.596341	1.26396e-50
MIPOL1	0.595582	1.80964e-50
TCEA1	0.595098	2.2737e-50
VPS72	0.593008	6.07244e-50
UTP23	0.590042	2.41709e-49
TBK1	0.589914	2.56479e-49
UBE2V2	0.589728	2.7952e-49
ERICH1	0.587421	8.09373e-49
FNTA	0.587148	9.1752e-49
IPO8	0.586682	1.13573e-48
DDX27	0.585776	1.71921e-48
C11ORF57	0.585252	2.18259e-48
GEMIN2	0.58262	7.20348e-48
MTERF3	0.582065	9.25054e-48
ERGIC2	0.581803	1.04123e-47
PPHLN1	0.580885	1.57275e-47
COPB2	0.580747	1.67388e-47
FKBP3	0.579972	2.36792e-47
DPM1	0.579675	2.70465e-47
ASUN	0.579125	3.45798e-47
YTHDF3	0.577992	5.72655e-47
MTFR1	0.576945	9.11176e-47
ALKBH5	0.575756	1.5409e-46
ATP6V1H	0.575457	1.75749e-46
ZNF202	0.574336	2.87722e-46
GOLT1B	0.57397	3.37826e-46
AP5M1	0.572999	5.1654e-46
CCT6A	0.571468	1.00664e-45
NUP107	0.571264	1.0999e-45
POLR2K	0.568874	3.09122e-45
RNMT	0.567626	5.28617e-45
APEX1	0.567392	5.84418e-45
SNX6	0.567318	6.03227e-45
TMEM55B	0.567065	6.72253e-45
TPD52	0.566566	8.32081e-45
STK3	0.565705	1.20153e-44
NUBPL	0.565603	1.25513e-44
TBP	0.565521	1.29936e-44
LRRC47	0.564654	1.87876e-44
AP3M2	0.564259	2.22108e-44
MRPL15	0.56396	2.52136e-44
PAF1	0.562445	4.78177e-44
FGFR1OP2	0.56175	6.40731e-44
C8ORF76	0.561178	8.14537e-44
TAF2	0.561116	8.35901e-44
EAPP	0.560695	9.97446e-44
UQCRFS1	0.559702	1.51095e-43
ARMC1	0.558261	2.75282e-43
FBXO33	0.557871	3.23598e-43
CCDC91	0.556882	4.87395e-43
MRPS22	0.55546	8.76305e-43
MRPL13	0.554373	1.36934e-42
PARP2	0.553178	2.23289e-42
ACTR10	0.552518	2.92339e-42
MRPS28	0.551486	4.44639e-42
IMPAD1	0.550377	6.96899e-42
KRAS	0.550096	7.80789e-42
KAT6A	0.550026	8.03173e-42
CCDC59	0.549474	1.00377e-41
BUD13	0.549311	1.07194e-41
PPP2R3C	0.54698	2.73218e-41
POGK	0.545971	4.08829e-41
FAM60A	0.545963	4.10116e-41
NDUFB9	0.544925	6.19763e-41
TATDN1	0.542788	1.44367e-40
ANKRD27	0.541519	2.3776e-40
G2E3	0.539575	5.08753e-40
TADA1	0.539346	5.56407e-40
CSE1L	0.538637	7.33287e-40
CDC5L	0.536683	1.56352e-39
CCT2	0.536157	1.9156e-39
ABCF1	0.535013	2.97462e-39
MRPS17	0.532511	7.74732e-39
ZNF644	0.532474	7.85751e-39
C14ORF166	0.532224	8.64002e-39
MED17	0.531187	1.28133e-38
CES2	0.530941	1.40665e-38
TMX1	0.530808	1.4795e-38
RRS1	0.529749	2.20805e-38
RAB6A	0.528762	3.20207e-38
PSPH	0.528229	3.91221e-38
TDRKH	0.525515	1.07918e-37
RNF139	0.524618	1.50603e-37
PSMB1	0.52291	2.83369e-37
RB1CC1	0.522362	3.46806e-37
TDRP	0.521965	4.01239e-37
LEMD3	0.521432	4.8821e-37
COX6C	0.521396	4.94607e-37
LAPTM4B	0.519651	9.36773e-37
USP15	0.517876	1.78742e-36
PPFIA1	0.517112	2.35682e-36
CWF19L2	0.516124	3.36873e-36
MAPK1IP1L	0.515769	3.82796e-36
NXT1	0.512534	1.22017e-35
MAU2	0.511865	1.5487e-35
AASDHPPT	0.511324	1.87688e-35
MRPL9	0.509728	3.30289e-35
DCTN2	0.508816	4.5553e-35
LYPLA1	0.507628	6.91602e-35
RAB21	0.507627	6.91875e-35
RECQL	0.507357	7.60536e-35
SOCS4	0.506843	9.1024e-35
RNF26	0.50393	2.50962e-34
CFL2	0.502785	3.72931e-34
HECTD1	0.502543	4.053e-34
TMEM5	0.502296	4.41418e-34
PHF3	0.501685	5.44758e-34
PYROXD1	0.499777	1.04764e-33
CAND1	0.499394	1.19404e-33
SEC61G	0.499128	1.30718e-33
ALG8	0.498841	1.4419e-33
C2CD5	0.49686	2.82543e-33
PUS3	0.496747	2.9349e-33
VCPIP1	0.495825	4.0071e-33
STK38L	0.4953	4.78396e-33
METTL1	0.494216	6.8846e-33
ARNT	0.494075	7.21998e-33
AARS2	0.492888	1.07394e-32
YWHAB	0.491439	1.7406e-32
NPAT	0.490067	2.74413e-32
PI4KB	0.488283	4.94376e-32
TJAP1	0.487605	6.17796e-32
YEATS4	0.486012	1.04077e-31
ETNK1	0.485106	1.39819e-31
IMPA1	0.484601	1.64801e-31
PRKDC	0.48136	4.69893e-31
XPOT	0.481304	4.78482e-31
UBXN2B	0.481255	4.86047e-31
KLHL42	0.480875	5.49158e-31
SS18L1	0.479779	7.80175e-31
PFDN4	0.47845	1.19261e-30
MDM2	0.476648	2.11361e-30
CDK4	0.476488	2.22297e-30
R3HDM2	0.474478	4.19023e-30
CWC15	0.473883	5.05157e-30
UQCRB	0.468799	2.4574e-29
EMSY	0.466182	5.48952e-29
MED21	0.465206	7.39587e-29
ARFGEF2	0.463243	1.34298e-28
SLC25A21	0.462157	1.86511e-28
PIK3CB	0.459838	3.74634e-28
MON2	0.459377	4.30057e-28
FAM177A1	0.450106	6.59886e-27
TWF1	0.448819	9.57656e-27
SHQ1	0.445502	2.48341e-26
MDM1	0.444259	3.53922e-26
SLC25A36	0.438701	1.69552e-25
CHD7	0.438482	1.80261e-25
NFIB	0.437568	2.32533e-25
SLC35E3	0.435007	4.72743e-25
C12ORF66	0.434643	5.22608e-25
METTL3	0.43425	5.82366e-25
TM7SF3	0.434079	6.10396e-25
EGFR	0.426936	4.2542e-24
PARK7	0.425517	6.22106e-24
TBC1D15	0.423784	9.87512e-24
FAM96B	0.422795	1.28384e-23
HEATR5A	0.420454	2.38096e-23
LRR1	0.420109	2.60656e-23
GMFB	0.409388	4.13624e-22
NAPB	0.409353	4.17276e-22
ANKRD49	0.407969	5.91937e-22
PSMA3	0.405146	1.20153e-21
OSGEP	0.404576	1.38516e-21
TMEM126B	0.404486	1.41661e-21
GPANK1	0.400091	4.19824e-21
ALG10	0.397784	7.37761e-21
FRS2	0.397073	8.77097e-21
GXYLT1	0.395886	1.16937e-20
DLAT	0.395745	1.20988e-20
PNN	0.393755	1.95473e-20
GALNT10	0.392078	2.92058e-20
SEC23A	0.391074	3.70999e-20
RDX	0.390384	4.37146e-20
OSBPL1A	0.390272	4.48914e-20
NOL9	0.389509	5.3788e-20
RAP1B	0.387269	9.1203e-20
METTL17	0.386796	1.01904e-19
GNS	0.386294	1.14648e-19
ARNTL2	0.383394	2.2527e-19
TMEM126A	0.381135	3.79514e-19
C11ORF73	0.378446	7.02336e-19
PAX9	0.378239	7.36197e-19
WRAP73	0.377626	8.46334e-19
FOXA1	0.374338	1.77878e-18
LANCL2	0.372941	2.43263e-18
VOPP1	0.369261	5.50925e-18
CPSF6	0.368213	6.93895e-18
NDUFA13	0.365306	1.31082e-17
NAP1L1	0.365166	1.35129e-17
DYRK2	0.363332	2.01134e-17
CCHCR1	0.362219	2.55717e-17
ZBTB48	0.347402	5.72217e-16
SLC36A4	0.345377	8.64161e-16
TRIT1	0.344782	9.7484e-16
HYLS1	0.344374	1.05878e-15
CABLES1	0.344127	1.11277e-15
SSBP4	0.34291	1.42208e-15
PPFIBP1	0.336829	4.76419e-15
RYBP	0.334425	7.6275e-15
ZC3H15	0.33119	1.42767e-14
IFT46	0.329339	2.03712e-14
ARL5A	0.326461	3.52277e-14
HACD2	0.320917	9.95463e-14
TIMM8B	0.314526	3.21164e-13
TMEM218	0.305892	1.49529e-12
ATP5L	0.303792	2.15744e-12
BICD1	0.301979	2.95351e-12
DENND5B	0.29107	1.86754e-11
MBIP	0.280781	9.90524e-11
MTMR2	0.278669	1.38346e-10
CHEK1	0.2769	1.82622e-10
SPOPL	0.274856	2.51084e-10
CEBPD	0.264743	1.16698e-09
PTHLH	0.254927	4.88106e-09
PPP4R2	0.24964	1.02945e-08
CCDC90B	0.242757	2.65223e-08
PTS	0.231632	1.15376e-07
ZNF713	0.217505	6.72434e-07
KIAA1551	0.210985	1.45944e-06
CST3	0.204284	3.15669e-06
C7ORF31	0.196899	7.17505e-06
LPCAT2	0.162592	0.000220189
USP2	0.125888	0.00433212
XIST	0.080575	0.0684987

## Sheet: S9C TCGA cBioportal SCC
Suppl Table 9C: Analysis of highly correlating genes from squamous cell cancer in an independent data set. CNV and gene expression data from 504 squamous cell cancer cases provided by the TCGA were retrieved from cBioPortal (http://www.cbioportal.org, Gao et al. Sci. Signal. 2013 & Cerami et al. Cancer Discov. 2012). The data for gene expression and gene copy numbers (putative categorised using G…
Gene symbol	Spearman rho	p-value
ASH2L	0.837053	5.25258e-132		9% with rho > 0.7
LSM1	0.800251	3.11178e-112		38% with rho > 0.6
SMU1	0.79559	5.01944e-110		73% with rho > 0.5
WHSC1L1	0.788585	8.17826e-107
WDR20	0.779687	6.62024e-103
TOX4	0.77902	1.2772e-102
VTI1B	0.778951	1.3663e-102
UBE2R2	0.777407	6.20283e-102
TOPORS	0.771885	1.25951e-99
PROSC	0.771025	2.84083e-99
VCP	0.761416	1.99726e-95
BRF2	0.754335	1.0491e-92
CCNK	0.751833	9.11792e-92
TM2D2	0.746147	1.12993e-89
DCAF12	0.744834	3.3742e-89
CHMP7	0.7429	1.67223e-88
NFX1	0.742051	3.36001e-88
SNW1	0.741039	7.68943e-88
ERLIN2	0.734428	1.56803e-85
MED29	0.726588	7.0066e-83
ZNF24	0.726482	7.59778e-83
ALKBH1	0.723104	9.85796e-82
DCAF10	0.721957	2.33244e-81
BAG4	0.720957	4.92636e-81
SCFD1	0.717893	4.7723e-80
BAG5	0.716721	1.12891e-79
PPFIA1	0.715457	2.84085e-79
CLTA	0.712599	2.24934e-78
POLR2B	0.712041	3.35796e-78
ZNF271P	0.707677	7.47852e-77
CDC37L1	0.707523	8.33842e-77
PLPP5	0.705171	4.33283e-76
MED6	0.704835	5.47257e-76
ZCCHC7	0.704758	5.77631e-76
PIGO	0.704146	8.83632e-76
GRHPR	0.702672	2.45036e-75
AKT2	0.701507	5.46367e-75
NELFB	0.701178	6.84671e-75
TOMM70A	0.701039	7.53316e-75
STRN3	0.700878	8.40904e-75
NGDN	0.700496	1.09213e-74
DDHD2	0.697368	9.14227e-74
UBAP1	0.691151	5.75052e-72
FADD	0.69036	9.66716e-72
EXOSC3	0.690064	1.17338e-71
TTI2	0.69004	1.19251e-71
FANCG	0.689849	1.35147e-71
EXOC1	0.688521	3.21304e-71
AP4S1	0.68811	4.19805e-71
BTBD6	0.687966	4.61061e-71
DCTN6	0.685432	2.37e-70
DCTN3	0.68358	7.75617e-70
POLR1E	0.683186	9.97227e-70
RNF38	0.682523	1.51992e-69
MAK16	0.682066	2.03184e-69
STOML2	0.681101	3.74196e-69
CCDC97	0.679274	1.18162e-68
DNAJC21	0.678967	1.43148e-68
DNAJA1	0.678578	1.82649e-68
PPP2R5C	0.678345	2.11282e-68
PUM3	0.67781	2.95111e-68
APTX	0.676428	6.9662e-68
GOLGA7	0.674049	3.02327e-67
PAF1	0.672989	5.78896e-67
HINT2	0.670865	2.11156e-66
GBA2	0.669773	4.08816e-66
DYRK1A	0.669295	5.45611e-66
USO1	0.668963	6.66504e-66
MTPAP	0.666855	2.35833e-65
KIAA0391	0.665668	4.78203e-65
TESK1	0.665184	6.37412e-65
TRMO	0.664879	7.6383e-65
EIF4EBP1	0.664207	1.13674e-64
NOL8	0.662734	2.70833e-64
MAEA	0.662564	2.99258e-64
DCUN1D1	0.662515	3.08082e-64
CLPTM1L	0.662458	3.18618e-64
CREB3	0.661569	5.36254e-64
SMIM19	0.661258	6.43201e-64
SUPT5H	0.660109	1.25718e-63
KAT6A	0.66003	1.31601e-63
ZBTB5	0.658786	2.70855e-63
RNF121	0.657676	5.14252e-63
DDX24	0.657392	6.05791e-63
USP47	0.656246	1.16976e-62
LONP2	0.655525	1.76769e-62
SUPT16H	0.655387	1.91238e-62
ANKRD27	0.655276	2.03772e-62
TRMT10B	0.654163	3.84335e-62
BTBD1	0.653199	6.64284e-62
GLRX5	0.652712	8.75288e-62
HOOK3	0.652235	1.14586e-61
SS18	0.651614	1.62635e-61
SIGMAR1	0.650777	2.60396e-61
GPATCH1	0.650186	3.62748e-61
ADD1	0.649874	4.31849e-61
NDUFB6	0.64952	5.26436e-61
CTR9	0.649126	6.56187e-61
ATP6V1D	0.64809	1.16829e-60
PTPN2	0.647175	1.94005e-60
C5ORF22	0.646804	2.38317e-60
ZNF148	0.645042	6.29302e-60
PRMT5	0.644636	7.86605e-60
ATG14	0.644384	9.03037e-60
NEDD8	0.643655	1.34573e-59
GINS4	0.643297	1.63714e-59
CHMP5	0.643062	1.86107e-59
RIC1	0.643059	1.86424e-59
GMPR2	0.642937	1.99227e-59
CDCA4	0.642815	2.12886e-59
USP14	0.641757	3.78391e-59
ELP2	0.639914	1.02575e-58
AK3	0.637815	3.165e-58
PIK3R4	0.637666	3.42807e-58
PLGRKT	0.636759	5.56191e-58
UBAP2	0.635926	8.66186e-58
ARHGAP5	0.635277	1.22233e-57
NSUN2	0.632994	4.07806e-57
EAPP	0.632931	4.2148e-57
PAIP1	0.632106	6.49829e-57
EID2	0.631523	8.81601e-57
PSMC4	0.63137	9.54731e-57
NOA1	0.630341	1.63251e-56
MELK	0.630165	1.78942e-56
NSFL1C	0.629955	1.99556e-56
PSMD8	0.629881	2.07345e-56
NUP54	0.628803	3.62665e-56
RAD1	0.62808	5.27007e-56
POLB	0.627847	5.94301e-56
PSMB5	0.627704	6.39488e-56
CCT5	0.627007	9.15423e-56
VPS4B	0.624334	3.59372e-55
PRPSAP1	0.623264	6.18899e-55
DNAJC19	0.622956	7.23672e-55
WDR70	0.622873	7.54666e-55
SEH1L	0.621691	1.37087e-54
SRP72	0.621191	1.76354e-54
AFG3L2	0.620639	2.32792e-54
BRMS1L	0.620333	2.71469e-54
UBE2M	0.62006	3.11261e-54
NOL6	0.619588	3.94406e-54
ABCC5	0.618884	5.60591e-54
C14ORF119	0.617639	1.04224e-53
ATP5SL	0.61751	1.1109e-53
METTL4	0.617492	1.12111e-53
RNF20	0.616575	1.76628e-53
RPP25L	0.616274	2.0498e-53
CTTN	0.616109	2.22392e-53
GALT	0.615906	2.45888e-53
PSMG2	0.614381	5.21033e-53
WRNIP1	0.613703	7.26657e-53
PCMT1	0.613571	7.75258e-53
YBX1	0.610953	2.77706e-52
IFT74	0.610916	2.82769e-52
COX18	0.610898	2.8518e-52
SPIN1	0.610835	2.94103e-52
G2E3	0.608836	7.72579e-52
UBAC1	0.608647	8.46225e-52
STAU1	0.608611	8.60976e-52
ZNF397	0.608059	1.12247e-51
EIF3K	0.607819	1.2594e-51
TUBGCP2	0.607602	1.39735e-51
YES1	0.606914	1.94321e-51
TIMM50	0.604555	5.9752e-51
DROSHA	0.604445	6.29506e-51
ECH1	0.601965	2.02926e-50
PAK1IP1	0.601881	2.11111e-50
BRIX1	0.600876	3.38207e-50
ZNF622	0.600749	3.58878e-50
VDAC3	0.600466	4.09737e-50
SPTLC1	0.600364	4.29722e-50
DSCR3	0.600293	4.4418e-50
C17ORF80	0.60017	4.70396e-50
SNX6	0.599421	6.67027e-50
C18ORF21	0.597932	1.3323e-49
AP3M2	0.597222	1.84967e-49
PLPP6	0.59684	2.20697e-49
ZNF565	0.596056	3.16735e-49
KATNA1	0.594795	5.65122e-49
PSMD4	0.59379	8.95135e-49
TOMM5	0.593269	1.13537e-48
PAK4	0.593189	1.17717e-48
LETM2	0.591399	2.65405e-48
COPB1	0.590952	3.24987e-48
SMCHD1	0.590732	3.58882e-48
GOLPH3	0.590035	4.91605e-48
RNMT	0.589206	7.13839e-48
CWC15	0.589043	7.67883e-48
CCDC127	0.588638	9.20886e-48
C5ORF51	0.588561	9.53565e-48
CEP76	0.588414	1.01853e-47
ZBTB43	0.588091	1.17686e-47
ZNF576	0.588002	1.22464e-47
ZC3H15	0.587286	1.68633e-47
HLCS	0.587149	1.79283e-47
SIRT2	0.58694	1.96758e-47
ZNF45	0.585962	3.04151e-47
NUP85	0.584052	7.0855e-47
SPINT2	0.583526	8.93345e-47
POLR2I	0.582306	1.52781e-46
ANKRD40	0.581466	2.20721e-46
INIP	0.581091	2.60005e-46
FAM219A	0.581076	2.61757e-46
VAPA	0.580502	3.36199e-46
CCDC85C	0.578059	9.70991e-46
GEMIN2	0.577629	1.16941e-45
GART	0.576939	1.57441e-45
FBXO33	0.576803	1.66915e-45
RNF170	0.575952	2.40707e-45
PTK2	0.575932	2.42715e-45
HECTD1	0.575448	2.98747e-45
TMEM248	0.57517	3.36523e-45
FNTA	0.574108	5.29793e-45
MTMR12	0.572703	9.62924e-45
IKBKB	0.572412	1.08941e-44
RAB2B	0.570827	2.12957e-44
GTF2E1	0.570412	2.53712e-44
NEMF	0.570265	2.69915e-44
PAPOLA	0.570252	2.71343e-44
FASTKD3	0.569632	3.52192e-44
MRPS30	0.569552	3.6422e-44
FBXO10	0.569372	3.92769e-44
MORC3	0.568753	5.09111e-44
ZBED4	0.566189	1.4831e-43
PACS2	0.565958	1.63223e-43
TSEN54	0.565238	2.19912e-43
MRPL52	0.565114	2.31514e-43
NIPBL	0.565113	2.31528e-43
SEC23A	0.564227	3.33872e-43
RARS2	0.562625	6.45034e-43
FN3KRP	0.561883	8.74284e-43
MAU2	0.561842	8.8888e-43
MRE11A	0.561445	1.04558e-42
EEF1E1	0.561021	1.24345e-42
ALS2	0.560814	1.35265e-42
CSRP2BP	0.560654	1.44372e-42
PEX3	0.560291	1.67353e-42
RAB12	0.559946	1.92578e-42
MCCC1	0.559898	1.96335e-42
DTD2	0.559608	2.20916e-42
BAG1	0.559508	2.30018e-42
C11ORF73	0.559387	2.41636e-42
CRK	0.558134	4.01172e-42
PRKD2	0.55804	4.16777e-42
MBIP	0.557941	4.33716e-42
SIVA1	0.557476	5.23296e-42
DDX49	0.557433	5.32327e-42
OPA3	0.556968	6.42049e-42
RCHY1	0.556896	6.60836e-42
NDUFS1	0.556264	8.51939e-42
FBXL12	0.556026	9.37062e-42
UBE2V2	0.555713	1.06243e-41
MED10	0.554631	1.63759e-41
RGP1	0.554327	1.84821e-41
MTA1	0.552987	3.14992e-41
TARS	0.552358	4.04241e-41
WHAMM	0.55174	5.16242e-41
NFXL1	0.551163	6.4834e-41
ANKRD17	0.550969	6.99926e-41
ERCC1	0.550803	7.47144e-41
MRPS12	0.550349	8.93468e-41
TECPR2	0.550242	9.31798e-41
ZKSCAN5	0.550215	9.41526e-41
HN1L	0.549852	1.08621e-40
CMTR1	0.549667	1.1677e-40
NUP43	0.549536	1.22951e-40
BRF1	0.549344	1.32568e-40
TMEM161A	0.54919	1.40818e-40
FBL	0.548906	1.57358e-40
NUP155	0.547992	2.2495e-40
ZCCHC17	0.547647	2.5731e-40
ZBTB42	0.546577	3.90186e-40
RALBP1	0.545291	6.42472e-40
PDCD5	0.544595	8.40608e-40
INPP5A	0.543142	1.47012e-39
ZNF230	0.543137	1.473e-39
VKORC1L1	0.54184	2.4216e-39
SMG9	0.540335	4.29802e-39
VPS54	0.539706	5.45874e-39
NEK9	0.538291	9.3283e-39
ZNF410	0.537711	1.16108e-38
GSKIP	0.537592	1.21435e-38
MRPL18	0.535976	2.22874e-38
NDUFS6	0.535054	3.14664e-38
ATAD2	0.53485	3.39584e-38
NFKBIB	0.534341	4.10683e-38
THOC1	0.533617	5.37668e-38
BAZ1A	0.532963	6.85626e-38
METTL16	0.532907	6.99895e-38
GEMIN7	0.529779	2.22083e-37
CHMP1B	0.529445	2.51062e-37
ABT1	0.527702	4.74841e-37
LAMTOR1	0.526507	7.33471e-37
NUDT14	0.524861	1.33158e-36
ZSCAN30	0.524837	1.34303e-36
BTBD10	0.524759	1.38119e-36
CLDND1	0.522534	3.07518e-36
NIF3L1	0.522169	3.50465e-36
COG1	0.522164	3.51192e-36
FASTKD2	0.521957	3.78138e-36
ATP13A1	0.521176	4.99792e-36
ZNF587	0.520815	5.68531e-36
PPAT	0.51968	8.51181e-36
C5ORF28	0.518817	1.15599e-35
FAM173B	0.518485	1.29996e-35
PAPD7	0.518332	1.37229e-35
IRGQ	0.518045	1.51872e-35
NCBP3	0.517532	1.82004e-35
SNX5	0.516774	2.37703e-35
CCNI	0.516664	2.47049e-35
NUDT2	0.516378	2.73102e-35
PRPF4B	0.516021	3.09567e-35
NUP153	0.515798	3.34732e-35
PTRH2	0.515389	3.86373e-35
SUMO1	0.515325	3.95061e-35
BLOC1S3	0.514885	4.60863e-35
MTRR	0.514642	5.01698e-35
HEATR6	0.512654	1.00189e-34
LINC00667	0.512206	1.1704e-34
NUP107	0.512191	1.17637e-34
TMEM8B	0.511607	1.43952e-34
ORC2	0.510784	1.91256e-34
HDAC1	0.510223	2.32049e-34
MTMR4	0.509245	3.24677e-34
DAP	0.508667	3.95755e-34
TYW5	0.507223	6.481e-34
MRPL36	0.506257	9.00142e-34
TPCN2	0.506112	9.45515e-34
DEDD2	0.504523	1.61904e-33
SLAIN2	0.503576	2.22856e-33
FAR1	0.502574	3.12057e-33
PEX7	0.502421	3.28493e-33
USP36	0.499893	7.64041e-33
U2AF1L4	0.499533	8.61055e-33
DCAF7	0.499495	8.72135e-33
CNOT2	0.498708	1.13193e-32
C2ORF47	0.497806	1.52569e-32
ZNF446	0.497272	1.8192e-32
WDR12	0.497147	1.89584e-32
SEC16A	0.495748	3.00345e-32
BPHL	0.494677	4.26393e-32
RALGAPA1	0.494257	4.89168e-32
ZNF780B	0.493689	5.88628e-32
FBXO46	0.49367	5.92443e-32
BCKDHA	0.49347	6.32321e-32
CEP170B	0.493079	7.18062e-32
SUB1	0.49143	1.22548e-31
ZNF133	0.491375	1.24747e-31
KLHL42	0.490111	1.87551e-31
RB1CC1	0.48951	2.2757e-31
TRIP13	0.489148	2.5558e-31
COMMD8	0.488519	3.12767e-31
NADK2	0.486777	5.45487e-31
MARK4	0.48634	6.26772e-31
CYP20A1	0.484249	1.21606e-30
DIP2A	0.483744	1.42594e-30
SMURF2	0.483315	1.63255e-30
MCM4	0.483016	1.79354e-30
RPS16	0.479676	5.0982e-30
MIPOL1	0.479098	6.10207e-30
CDS2	0.478321	7.76248e-30
ZNF839	0.478162	8.15556e-30
PCNT	0.475096	2.09633e-29
NCOA6	0.47485	2.26027e-29
HERC2	0.473262	3.67184e-29
HKR1	0.472998	3.97808e-29
INO80D	0.472409	4.75937e-29
ANKRD12	0.466931	2.47495e-28
C2ORF69	0.46651	2.80571e-28
SGOL2	0.465168	4.1807e-28
DYNC1H1	0.465168	4.18077e-28
FAM98C	0.464826	4.6271e-28
SMURF1	0.464404	5.2426e-28
EXOSC5	0.462198	1.00435e-27
NNT	0.462197	1.00465e-27
TTC33	0.461065	1.4e-27
CAND1	0.460095	1.85858e-27
YEATS4	0.459233	2.38859e-27
PSMG4	0.458727	2.76721e-27
HGSNAT	0.458282	3.14842e-27
LPAR2	0.457415	4.04708e-27
ABI2	0.45505	7.99539e-27
TGIF1	0.453866	1.12216e-26
CHAF1B	0.451379	2.27676e-26
NDUFA13	0.45109	2.47087e-26
SF3B5	0.450303	3.08621e-26
IFT43	0.44632	9.43205e-26
HNRNPL	0.446089	1.00594e-25
MDM2	0.444342	1.63395e-25
SNRPD2	0.443652	1.97741e-25
MRPL13	0.44192	3.18582e-25
KCTD18	0.436728	1.30945e-24
NDUFB3	0.435815	1.67517e-24
TMEM237	0.43459	2.32709e-24
ZNF696	0.434023	2.70898e-24
FAM126B	0.432118	4.50158e-24
ORMDL1	0.43119	5.75968e-24
ENOSF1	0.431157	5.81054e-24
ADSSL1	0.430867	6.2739e-24
LEMD3	0.426024	2.23794e-23
CCDC61	0.425824	2.3571e-23
SIN3B	0.42541	2.6253e-23
C1D	0.423039	4.85052e-23
NDUFAF5	0.422805	5.15243e-23
ZNF430	0.422113	6.15611e-23
CEP95	0.421314	7.55847e-23
TWF1	0.420763	8.70473e-23
LINC00493	0.418186	1.67842e-22
RUSC2	0.417654	1.92079e-22
SKP2	0.417471	2.01201e-22
RPP40	0.416537	2.54728e-22
FRYL	0.415958	2.94793e-22
TBC1D15	0.414587	4.16036e-22
PUS7L	0.414044	4.76635e-22
NOP58	0.413988	4.83304e-22
BMPR2	0.413732	5.15288e-22
ERMP1	0.409239	1.57078e-21
SHB	0.408673	1.80516e-21
HNRNPA3	0.403724	6.03033e-21
JAG2	0.403591	6.22657e-21
CRAMP1	0.39973	1.57292e-20
LYRM4	0.396476	3.40206e-20
WDPCP	0.395422	4.36041e-20
PIGP	0.390013	1.53584e-19
SFSWAP	0.389039	1.92192e-19
NXT1	0.383914	6.17957e-19
NUMA1	0.382779	7.98208e-19
PPP4R1	0.377545	2.56428e-18
NBEAL1	0.376583	3.17015e-18
TRAK2	0.375208	4.28876e-18
HEBP2	0.375085	4.40546e-18
DDX42	0.370041	1.31749e-17
RAB21	0.36387	4.90375e-17
MAP7	0.362786	6.16015e-17
SLC35E3	0.362522	6.5107e-17
PPIL3	0.358265	1.57929e-16
BPTF	0.355071	3.04315e-16
NFE2L2	0.352715	4.91476e-16
CYP2R1	0.350942	7.03021e-16
LINC00526	0.350209	8.14675e-16
COMMD1	0.346014	1.87904e-15
CCDC115	0.34538	2.12977e-15
IFT140	0.330222	3.91164e-14
EML2	0.32677	7.42332e-14
TRRAP	0.323841	1.27028e-13
TUBGCP6	0.29474	1.93958e-11
FAM117B	0.291697	3.17931e-11
NIPAL1	0.277365	3.01351e-10
DYRK2	0.242497	4.25437e-08
ZFC3H1	0.228939	2.40569e-07
PNN	0.216377	1.09156e-06
TMEM19	0.210977	2.0354e-06
ICA1L	0.201526	5.82835e-06
NOTCH2	0.195336	1.13081e-05
MPP4	0.180852	4.92282e-05
SIM2	0.175189	8.4908e-05
